# Supplementary material for: Transcriptomic analysis reveals impact of gE/gI/TK deletions on host response to PRV infection
Source: Virol J. 2023 Dec 19;20:303. doi: 10.1186/s12985-023-02265-y (PMC10731697; doi:10.1186/s12985-023-02265-y)
Supplement: Supplementary file 6 — Supplementary Material 6: SD2017vsPK15_all_GOenrich Supplementary [file 12985_2023_2265_MOESM6_ESM.xls]

Category	GOID	Description	GeneRatio	BgRatio	pvalue	padj	geneID	geneName	Count	Up	Up_Gene_id	Down	Down_Gene_id
BP	GO:0098813	nuclear chromosome segregation	50/1419	184/10877	1.98077833029074e-07	0.000865005896837967	ENSSSCG00000007351/ENSSSCG00000011213/ENSSSCG00000005403/ENSSSCG00000010625/ENSSSCG00000011731/ENSSSCG00000031821/ENSSSCG00000000693/ENSSSCG00000004466/ENSSSCG00000007954/ENSSSCG00000035746/ENSSSCG00000012642/ENSSSCG00000023112/ENSSSCG00000006105/ENSSSCG00000014969/ENSSSCG00000012434/ENSSSCG00000017308/ENSSSCG00000016092/ENSSSCG00000005255/ENSSSCG00000017473/ENSSSCG00000016842/ENSSSCG00000010357/…	FAM83D/TOP2B/SMC2/SMC3/SMC4/HASPIN/NCAPD2/TTK/SLX4/ECT2/STAG2/PDS5A/GEM/-/ATRX/CDC27/SGO2/SMC5/TOP2A/NIPBL/WAPL/KIF14/VPS4B/SPICE1/-/SYCE1/KPNB1/PIBF1/POGZ/CENPE/TPR/CDC14B/ESCO1/ABRAXAS2/SMC1A/CENPF/ATM/CENPC/HECW2/PDS5B/ERCC4/CCNB1IP1/UBE2B/FANCM/CENPQ/CCNE2/KIF18A/SLF1/CEP57L1/HFM1	50	13	ENSSSCG00000007351/ENSSSCG00000031821/ENSSSCG00000000693/ENSSSCG00000007954/ENSSSCG00000010912/ENSSSCG00000024663/ENSSSCG00000017514/ENSSSCG00000006622/ENSSSCG00000027557/ENSSSCG00000010737/ENSSSCG00000012325/ENSSSCG00000016068/ENSSSCG00000007881	37	ENSSSCG00000011213/ENSSSCG00000005403/ENSSSCG00000010625/ENSSSCG00000011731/ENSSSCG00000004466/ENSSSCG00000035746/ENSSSCG00000012642/ENSSSCG00000023112/ENSSSCG00000006105/ENSSSCG00000014969/ENSSSCG00000012434/ENSSSCG00000017308/ENSSSCG00000016092/ENSSSCG00000005255/ENSSSCG00000017473/ENSSSCG00000016842/ENSSSCG00000010357/ENSSSCG00000004893/ENSSSCG00000011917/ENSSSCG00000010779/ENSSSCG00000024722/…
BP	GO:0007059	chromosome segregation	56/1419	225/10877	8.84366206466057e-07	0.00193101361181864	ENSSSCG00000007351/ENSSSCG00000011213/ENSSSCG00000005403/ENSSSCG00000012252/ENSSSCG00000010625/ENSSSCG00000008614/ENSSSCG00000011731/ENSSSCG00000031821/ENSSSCG00000000693/ENSSSCG00000004466/ENSSSCG00000010471/ENSSSCG00000007954/ENSSSCG00000035746/ENSSSCG00000012642/ENSSSCG00000009670/ENSSSCG00000023112/ENSSSCG00000006105/ENSSSCG00000014969/ENSSSCG00000012434/ENSSSCG00000017308/ENSSSCG00000016092/…	FAM83D/TOP2B/SMC2/DDX3X/SMC3/SMC6/SMC4/HASPIN/NCAPD2/TTK/KIF11/SLX4/ECT2/STAG2/ESCO2/PDS5A/GEM/-/ATRX/CDC27/SGO2/SMC5/TOP2A/NIPBL/WAPL/KIF14/VPS4B/SPICE1/-/SYCE1/KPNB1/PIBF1/POGZ/CENPE/TPR/CDC14B/ESCO1/ABRAXAS2/PUM1/SMC1A/CENPF/ATM/SPC25/CENPC/HECW2/PDS5B/ERCC4/CCNB1IP1/UBE2B/FANCM/CENPQ/CCNE2/KIF18A/SLF1/CEP57L1/HFM1	56	14	ENSSSCG00000007351/ENSSSCG00000031821/ENSSSCG00000000693/ENSSSCG00000007954/ENSSSCG00000010912/ENSSSCG00000024663/ENSSSCG00000017514/ENSSSCG00000006622/ENSSSCG00000027557/ENSSSCG00000010737/ENSSSCG00000003591/ENSSSCG00000012325/ENSSSCG00000016068/ENSSSCG00000007881	42	ENSSSCG00000011213/ENSSSCG00000005403/ENSSSCG00000012252/ENSSSCG00000010625/ENSSSCG00000008614/ENSSSCG00000011731/ENSSSCG00000004466/ENSSSCG00000010471/ENSSSCG00000035746/ENSSSCG00000012642/ENSSSCG00000009670/ENSSSCG00000023112/ENSSSCG00000006105/ENSSSCG00000014969/ENSSSCG00000012434/ENSSSCG00000017308/ENSSSCG00000016092/ENSSSCG00000005255/ENSSSCG00000017473/ENSSSCG00000016842/ENSSSCG00000010357/…
BP	GO:1903047	mitotic cell cycle process	88/1419	428/10877	6.40415003554867e-06	0.00932230773508035	ENSSSCG00000011213/ENSSSCG00000005403/ENSSSCG00000012252/ENSSSCG00000010625/ENSSSCG00000016291/ENSSSCG00000016346/ENSSSCG00000038185/ENSSSCG00000003928/ENSSSCG00000009083/ENSSSCG00000006127/ENSSSCG00000027251/ENSSSCG00000011731/ENSSSCG00000016925/ENSSSCG00000031821/ENSSSCG00000012307/ENSSSCG00000000693/ENSSSCG00000004466/ENSSSCG00000021966/ENSSSCG00000015874/ENSSSCG00000010471/ENSSSCG00000005267/…	TOP2B/SMC2/DDX3X/SMC3/GIGYF2/MAD2L1BP/EREG/PLK3/SPRY1/NBN/CDC7/SMC4/PLK2/HASPIN/CCNB3/NCAPD2/TTK/TOPBP1/ACVR1/KIF11/ANXA1/ECT2/RGCC/STAG2/NAE1/PKD2/PDS5A/DTL/INTS13/-/ATRX/KIF20B/CDC27/KNTC1/SMC5/TOP2A/NPAT/CDKN1A/NIPBL/REEP3/WAPL/PLCB1/KIF14/VPS4B/SPICE1/USP8/-/KPNB1/PIBF1/CHEK1/CUL4B/ATAD5/CLASP1/ANKRD17/POGZ/CENPE/USP47/DNA2/TPR/CDC14B/PRKDC/EIF4E/ABRAXAS2/EGFR/SIN3A/ACVR1B/SPTBN1/SMC1A/CENPF/…	88	28	ENSSSCG00000016291/ENSSSCG00000016346/ENSSSCG00000009083/ENSSSCG00000027251/ENSSSCG00000016925/ENSSSCG00000031821/ENSSSCG00000012307/ENSSSCG00000000693/ENSSSCG00000015874/ENSSSCG00000009217/ENSSSCG00000015600/ENSSSCG00000010912/ENSSSCG00000024663/ENSSSCG00000017514/ENSSSCG00000039157/ENSSSCG00000024592/ENSSSCG00000006622/ENSSSCG00000027557/ENSSSCG00000006274/ENSSSCG00000010737/ENSSSCG00000022126/…	60	ENSSSCG00000011213/ENSSSCG00000005403/ENSSSCG00000012252/ENSSSCG00000010625/ENSSSCG00000038185/ENSSSCG00000003928/ENSSSCG00000006127/ENSSSCG00000011731/ENSSSCG00000004466/ENSSSCG00000021966/ENSSSCG00000010471/ENSSSCG00000005267/ENSSSCG00000035746/ENSSSCG00000009434/ENSSSCG00000012642/ENSSSCG00000035639/ENSSSCG00000023112/ENSSSCG00000030443/ENSSSCG00000014969/ENSSSCG00000012434/ENSSSCG00000010457/…
BP	GO:0000819	sister chromatid segregation	35/1419	129/10877	1.35770397882703e-05	0.0148227331888441	ENSSSCG00000011213/ENSSSCG00000005403/ENSSSCG00000010625/ENSSSCG00000011731/ENSSSCG00000031821/ENSSSCG00000000693/ENSSSCG00000004466/ENSSSCG00000012642/ENSSSCG00000023112/ENSSSCG00000014969/ENSSSCG00000012434/ENSSSCG00000017308/ENSSSCG00000016092/ENSSSCG00000005255/ENSSSCG00000017473/ENSSSCG00000016842/ENSSSCG00000010357/ENSSSCG00000010912/ENSSSCG00000004893/ENSSSCG00000011917/ENSSSCG00000017514/…	TOP2B/SMC2/SMC3/SMC4/HASPIN/NCAPD2/TTK/STAG2/PDS5A/-/ATRX/CDC27/SGO2/SMC5/TOP2A/NIPBL/WAPL/KIF14/VPS4B/-/KPNB1/PIBF1/POGZ/CENPE/TPR/CDC14B/ESCO1/SMC1A/ATM/CENPC/HECW2/PDS5B/KIF18A/SLF1/CEP57L1	35	8	ENSSSCG00000031821/ENSSSCG00000000693/ENSSSCG00000010912/ENSSSCG00000017514/ENSSSCG00000006622/ENSSSCG00000027557/ENSSSCG00000012325/ENSSSCG00000016068	27	ENSSSCG00000011213/ENSSSCG00000005403/ENSSSCG00000010625/ENSSSCG00000011731/ENSSSCG00000004466/ENSSSCG00000012642/ENSSSCG00000023112/ENSSSCG00000014969/ENSSSCG00000012434/ENSSSCG00000017308/ENSSSCG00000016092/ENSSSCG00000005255/ENSSSCG00000017473/ENSSSCG00000016842/ENSSSCG00000010357/ENSSSCG00000004893/ENSSSCG00000011917/ENSSSCG00000024722/ENSSSCG00000023296/ENSSSCG00000015576/ENSSSCG00000003700/…
BP	GO:0007064	mitotic sister chromatid cohesion	11/1419	22/10877	3.18303328259062e-05	0.0278006126901464	ENSSSCG00000031821/ENSSSCG00000023112/ENSSSCG00000012434/ENSSSCG00000005255/ENSSSCG00000016842/ENSSSCG00000010357/ENSSSCG00000011917/ENSSSCG00000006622/ENSSSCG00000012325/ENSSSCG00000009345/ENSSSCG00000014163	HASPIN/PDS5A/ATRX/SMC5/NIPBL/WAPL/-/POGZ/SMC1A/PDS5B/SLF1	11	3	ENSSSCG00000031821/ENSSSCG00000006622/ENSSSCG00000012325	8	ENSSSCG00000023112/ENSSSCG00000012434/ENSSSCG00000005255/ENSSSCG00000016842/ENSSSCG00000010357/ENSSSCG00000011917/ENSSSCG00000009345/ENSSSCG00000014163
BP	GO:0000280	nuclear division	62/1419	292/10877	5.58466214337565e-05	0.0406470326335357	ENSSSCG00000011213/ENSSSCG00000005403/ENSSSCG00000023303/ENSSSCG00000010625/ENSSSCG00000016346/ENSSSCG00000038185/ENSSSCG00000011731/ENSSSCG00000016925/ENSSSCG00000031821/ENSSSCG00000000693/ENSSSCG00000004466/ENSSSCG00000010471/ENSSSCG00000007954/ENSSSCG00000009434/ENSSSCG00000012642/ENSSSCG00000023112/ENSSSCG00000030443/ENSSSCG00000014969/ENSSSCG00000012434/ENSSSCG00000010457/ENSSSCG00000017308/…	TOP2B/SMC2/FIGNL1/SMC3/MAD2L1BP/EREG/SMC4/PLK2/HASPIN/NCAPD2/TTK/KIF11/SLX4/RGCC/STAG2/PDS5A/INTS13/-/ATRX/KIF20B/CDC27/SGO2/SMC5/TOP2A/NIPBL/WAPL/MARF1/PLCB1/KIF14/VPS4B/SPICE1/-/SYCE1/KPNB1/PIBF1/CLASP1/GPR3/POGZ/CENPE/WNT5A/TPR/CDC14B/ABRAXAS2/CYP26B1/SMC1A/ATM/SPC25/CENPC/HECW2/CEP126/PDS5B/ERCC4/CCNB1IP1/UBE2B/GNAI1/MND1/FANCM/CCNE2/KIF18A/SLF1/CEP57L1/HFM1	62	19	ENSSSCG00000023303/ENSSSCG00000016346/ENSSSCG00000016925/ENSSSCG00000031821/ENSSSCG00000000693/ENSSSCG00000007954/ENSSSCG00000029168/ENSSSCG00000010912/ENSSSCG00000024663/ENSSSCG00000017514/ENSSSCG00000039157/ENSSSCG00000006622/ENSSSCG00000035859/ENSSSCG00000027557/ENSSSCG00000010737/ENSSSCG00000008311/ENSSSCG00000012325/ENSSSCG00000016068/ENSSSCG00000007881	43	ENSSSCG00000011213/ENSSSCG00000005403/ENSSSCG00000010625/ENSSSCG00000038185/ENSSSCG00000011731/ENSSSCG00000004466/ENSSSCG00000010471/ENSSSCG00000009434/ENSSSCG00000012642/ENSSSCG00000023112/ENSSSCG00000030443/ENSSSCG00000014969/ENSSSCG00000012434/ENSSSCG00000010457/ENSSSCG00000017308/ENSSSCG00000016092/ENSSSCG00000005255/ENSSSCG00000017473/ENSSSCG00000016842/ENSSSCG00000010357/ENSSSCG00000007056/…
BP	GO:0070536	protein K63-linked deubiquitination	10/1419	20/10877	7.37027341899807e-05	0.0459799771725208	ENSSSCG00000027594/ENSSSCG00000006663/ENSSSCG00000011765/ENSSSCG00000004154/ENSSSCG00000004639/ENSSSCG00000010737/ENSSSCG00000012305/ENSSSCG00000015659/ENSSSCG00000024623/ENSSSCG00000022774	USP16/OTUD7B/USP13/TNFAIP3/USP8/ABRAXAS2/USP27X/YOD1/USP25/NOP53	10	4	ENSSSCG00000006663/ENSSSCG00000011765/ENSSSCG00000010737/ENSSSCG00000012305	6	ENSSSCG00000027594/ENSSSCG00000004154/ENSSSCG00000004639/ENSSSCG00000015659/ENSSSCG00000024623/ENSSSCG00000022774
BP	GO:0048285	organelle fission	66/1419	323/10877	0.000110402936556659	0.0549874180925799	ENSSSCG00000011213/ENSSSCG00000005403/ENSSSCG00000023303/ENSSSCG00000010625/ENSSSCG00000016346/ENSSSCG00000038185/ENSSSCG00000011731/ENSSSCG00000016925/ENSSSCG00000031821/ENSSSCG00000000693/ENSSSCG00000004466/ENSSSCG00000011822/ENSSSCG00000010471/ENSSSCG00000007954/ENSSSCG00000009434/ENSSSCG00000012642/ENSSSCG00000023112/ENSSSCG00000030443/ENSSSCG00000014969/ENSSSCG00000012434/ENSSSCG00000010457/…	TOP2B/SMC2/FIGNL1/SMC3/MAD2L1BP/EREG/SMC4/PLK2/HASPIN/NCAPD2/TTK/OPA1/KIF11/SLX4/RGCC/STAG2/PDS5A/INTS13/-/ATRX/KIF20B/CDC27/SGO2/SMC5/TOP2A/NIPBL/WAPL/MARF1/PLCB1/KIF14/VPS4B/SPICE1/SLC25A46/-/SYCE1/KPNB1/PIBF1/CLASP1/GPR3/POGZ/CENPE/WNT5A/TPR/CDC14B/ABRAXAS2/CYP26B1/SMC1A/MX2/ATM/SPC25/ACOT8/CENPC/HECW2/CEP126/PDS5B/ERCC4/CCNB1IP1/UBE2B/GNAI1/MND1/FANCM/CCNE2/KIF18A/SLF1/CEP57L1/HFM1	66	20	ENSSSCG00000023303/ENSSSCG00000016346/ENSSSCG00000016925/ENSSSCG00000031821/ENSSSCG00000000693/ENSSSCG00000007954/ENSSSCG00000029168/ENSSSCG00000010912/ENSSSCG00000024663/ENSSSCG00000017514/ENSSSCG00000039157/ENSSSCG00000006622/ENSSSCG00000035859/ENSSSCG00000027557/ENSSSCG00000010737/ENSSSCG00000008311/ENSSSCG00000012325/ENSSSCG00000012076/ENSSSCG00000016068/ENSSSCG00000007881	46	ENSSSCG00000011213/ENSSSCG00000005403/ENSSSCG00000010625/ENSSSCG00000038185/ENSSSCG00000011731/ENSSSCG00000004466/ENSSSCG00000011822/ENSSSCG00000010471/ENSSSCG00000009434/ENSSSCG00000012642/ENSSSCG00000023112/ENSSSCG00000030443/ENSSSCG00000014969/ENSSSCG00000012434/ENSSSCG00000010457/ENSSSCG00000017308/ENSSSCG00000016092/ENSSSCG00000005255/ENSSSCG00000017473/ENSSSCG00000016842/ENSSSCG00000010357/…
BP	GO:0043902	positive regulation of multi-organism process	31/1419	120/10877	0.00011332419574839	0.0549874180925799	ENSSSCG00000012252/ENSSSCG00000010625/ENSSSCG00000013125/ENSSSCG00000006983/ENSSSCG00000005305/ENSSSCG00000017473/ENSSSCG00000007056/ENSSSCG00000004893/ENSSSCG00000000272/ENSSSCG00000038443/ENSSSCG00000017268/ENSSSCG00000028536/ENSSSCG00000012727/ENSSSCG00000024592/ENSSSCG00000031493/ENSSSCG00000014211/ENSSSCG00000011363/ENSSSCG00000014177/ENSSSCG00000036568/ENSSSCG00000003591/ENSSSCG00000000233/…	DDX3X/SMC3/OSBP/CNOT7/UNC13B/TOP2A/PLCB1/VPS4B/SP1/ZNF639/PRKCA/LHFPL2/FMR1/ANKRD17/CYBA/YTHDC2/PRKAR2A/CHD1/MVB12A/PUM1/ACVR1B/LGALS1/BAD/LY96/SASH1/EP300/-/LARP1/APOE/ZP3/CD180	31	13	ENSSSCG00000013125/ENSSSCG00000005305/ENSSSCG00000000272/ENSSSCG00000017268/ENSSSCG00000028536/ENSSSCG00000024592/ENSSSCG00000011363/ENSSSCG00000003591/ENSSSCG00000000233/ENSSSCG00000033175/ENSSSCG00000000068/ENSSSCG00000017069/ENSSSCG00000016957	18	ENSSSCG00000012252/ENSSSCG00000010625/ENSSSCG00000006983/ENSSSCG00000017473/ENSSSCG00000007056/ENSSSCG00000004893/ENSSSCG00000038443/ENSSSCG00000012727/ENSSSCG00000031493/ENSSSCG00000014211/ENSSSCG00000014177/ENSSSCG00000036568/ENSSSCG00000033854/ENSSSCG00000013033/ENSSSCG00000006175/ENSSSCG00000010214/ENSSSCG00000003088/ENSSSCG00000007691
BP	GO:0070243	regulation of thymocyte apoptotic process	7/1419	11/10877	0.000129506071086423	0.0565553012434411	ENSSSCG00000006530/ENSSSCG00000003112/ENSSSCG00000005096/ENSSSCG00000002917/ENSSSCG00000035859/ENSSSCG00000008099/ENSSSCG00000021255	EFNA1/-/HIF1A/NFKBID/WNT5A/ZC3H8/ADA	7	1	ENSSSCG00000035859	6	ENSSSCG00000006530/ENSSSCG00000003112/ENSSSCG00000005096/ENSSSCG00000002917/ENSSSCG00000008099/ENSSSCG00000021255
BP	GO:2000108	positive regulation of leukocyte apoptotic process	9/1419	18/10877	0.000171347944376496	0.0669487685177055	ENSSSCG00000005385/ENSSSCG00000003112/ENSSSCG00000017705/ENSSSCG00000005267/ENSSSCG00000002917/ENSSSCG00000035859/ENSSSCG00000008099/ENSSSCG00000010235/ENSSSCG00000037319	NR4A3/-/CCL5/ANXA1/NFKBID/WNT5A/ZC3H8/SIRT1/PDCD1	9	1	ENSSSCG00000035859	8	ENSSSCG00000005385/ENSSSCG00000003112/ENSSSCG00000017705/ENSSSCG00000005267/ENSSSCG00000002917/ENSSSCG00000008099/ENSSSCG00000010235/ENSSSCG00000037319
BP	GO:0000070	mitotic sister chromatid segregation	28/1419	107/10877	0.000188615183081357	0.0669487685177055	ENSSSCG00000005403/ENSSSCG00000011731/ENSSSCG00000031821/ENSSSCG00000000693/ENSSSCG00000023112/ENSSSCG00000014969/ENSSSCG00000012434/ENSSSCG00000017308/ENSSSCG00000005255/ENSSSCG00000016842/ENSSSCG00000010357/ENSSSCG00000010912/ENSSSCG00000004893/ENSSSCG00000011917/ENSSSCG00000017514/ENSSSCG00000024722/ENSSSCG00000006622/ENSSSCG00000023296/ENSSSCG00000015576/ENSSSCG00000027557/ENSSSCG00000012325/…	SMC2/SMC4/HASPIN/NCAPD2/PDS5A/-/ATRX/CDC27/SMC5/NIPBL/WAPL/KIF14/VPS4B/-/KPNB1/PIBF1/POGZ/CENPE/TPR/CDC14B/SMC1A/ATM/CENPC/HECW2/PDS5B/KIF18A/SLF1/CEP57L1	28	8	ENSSSCG00000031821/ENSSSCG00000000693/ENSSSCG00000010912/ENSSSCG00000017514/ENSSSCG00000006622/ENSSSCG00000027557/ENSSSCG00000012325/ENSSSCG00000016068	20	ENSSSCG00000005403/ENSSSCG00000011731/ENSSSCG00000023112/ENSSSCG00000014969/ENSSSCG00000012434/ENSSSCG00000017308/ENSSSCG00000005255/ENSSSCG00000016842/ENSSSCG00000010357/ENSSSCG00000004893/ENSSSCG00000011917/ENSSSCG00000024722/ENSSSCG00000023296/ENSSSCG00000015576/ENSSSCG00000025606/ENSSSCG00000008921/ENSSSCG00000009345/ENSSSCG00000013332/ENSSSCG00000014163/ENSSSCG00000004391
BP	GO:0007062	sister chromatid cohesion	15/1419	43/10877	0.000211740001078362	0.0669487685177055	ENSSSCG00000010625/ENSSSCG00000031821/ENSSSCG00000012642/ENSSSCG00000023112/ENSSSCG00000012434/ENSSSCG00000016092/ENSSSCG00000005255/ENSSSCG00000016842/ENSSSCG00000010357/ENSSSCG00000011917/ENSSSCG00000006622/ENSSSCG00000003700/ENSSSCG00000012325/ENSSSCG00000009345/ENSSSCG00000014163	SMC3/HASPIN/STAG2/PDS5A/ATRX/SGO2/SMC5/NIPBL/WAPL/-/POGZ/ESCO1/SMC1A/PDS5B/SLF1	15	3	ENSSSCG00000031821/ENSSSCG00000006622/ENSSSCG00000012325	12	ENSSSCG00000010625/ENSSSCG00000012642/ENSSSCG00000023112/ENSSSCG00000012434/ENSSSCG00000016092/ENSSSCG00000005255/ENSSSCG00000016842/ENSSSCG00000010357/ENSSSCG00000011917/ENSSSCG00000003700/ENSSSCG00000009345/ENSSSCG00000014163
BP	GO:0006325	chromatin organization	88/1419	469/10877	0.000214628522841281	0.0669487685177055	ENSSSCG00000009047/ENSSSCG00000015288/ENSSSCG00000027594/ENSSSCG00000024253/ENSSSCG00000002344/ENSSSCG00000031821/ENSSSCG00000011417/ENSSSCG00000017744/ENSSSCG00000023724/ENSSSCG00000008080/ENSSSCG00000010928/ENSSSCG00000001958/ENSSSCG00000012434/ENSSSCG00000027115/ENSSSCG00000031159/ENSSSCG00000010189/ENSSSCG00000016842/ENSSSCG00000017310/ENSSSCG00000011081/ENSSSCG00000011340/ENSSSCG00000002526/…	SMARCA5/RBBP5/USP16/CTCF/RIOX1/HASPIN/DCAF1/SUZ12/ZBTB1/PHF2/KDM5B/BAZ1A/ATRX/-/BEND3/NUP133/NIPBL/KANSL1/-/SMARCC1/RCOR1/HAT1/USP15/-/ASXL1/TBL1XR1/EYA3/TSPYL4/PRKCA/CHEK1/CUL4B/SMARCA1/FMR1/JMJD1C/MIER1/TRIP12/EPC2/HDAC2/SART3/KMT2A/TET3/HIST1H2BB/TPR/BAZ1B/ARID4A/CHD1/USP27X/RIF1/-/HUWE1/ATAD2B/NCOA3/KAT6A/SETD5/KDM3B/-/PER1/TRRAP/SIN3A/YEATS2/PAXBP1/SIRT1/ATM/-/CHD7/ELK4/CREBBP/JARID2/WDHD1/E…	88	47	ENSSSCG00000015288/ENSSSCG00000024253/ENSSSCG00000002344/ENSSSCG00000031821/ENSSSCG00000011417/ENSSSCG00000008080/ENSSSCG00000010928/ENSSSCG00000027115/ENSSSCG00000031159/ENSSSCG00000010189/ENSSSCG00000017310/ENSSSCG00000011340/ENSSSCG00000002526/ENSSSCG00000007248/ENSSSCG00000003580/ENSSSCG00000004439/ENSSSCG00000017268/ENSSSCG00000024373/ENSSSCG00000009946/ENSSSCG00000023324/ENSSSCG00000008292/…	41	ENSSSCG00000009047/ENSSSCG00000027594/ENSSSCG00000017744/ENSSSCG00000023724/ENSSSCG00000001958/ENSSSCG00000012434/ENSSSCG00000016842/ENSSSCG00000011081/ENSSSCG00000015952/ENSSSCG00000000457/ENSSSCG00000011917/ENSSSCG00000011760/ENSSSCG00000015215/ENSSSCG00000029478/ENSSSCG00000012649/ENSSSCG00000012727/ENSSSCG00000010226/ENSSSCG00000030423/ENSSSCG00000027211/ENSSSCG00000004432/ENSSSCG00000031122/…
BP	GO:0016569	covalent chromatin modification	68/1419	349/10877	0.000373896200712001	0.108853647233954	ENSSSCG00000009047/ENSSSCG00000015288/ENSSSCG00000027594/ENSSSCG00000024253/ENSSSCG00000002344/ENSSSCG00000031821/ENSSSCG00000011417/ENSSSCG00000017744/ENSSSCG00000008080/ENSSSCG00000010928/ENSSSCG00000012434/ENSSSCG00000027115/ENSSSCG00000031159/ENSSSCG00000016842/ENSSSCG00000017310/ENSSSCG00000011081/ENSSSCG00000002526/ENSSSCG00000015952/ENSSSCG00000000457/ENSSSCG00000011917/ENSSSCG00000007248/…	SMARCA5/RBBP5/USP16/CTCF/RIOX1/HASPIN/DCAF1/SUZ12/PHF2/KDM5B/ATRX/-/BEND3/NIPBL/KANSL1/-/RCOR1/HAT1/USP15/-/ASXL1/TBL1XR1/EYA3/PRKCA/CHEK1/CUL4B/SMARCA1/FMR1/JMJD1C/MIER1/TRIP12/EPC2/HDAC2/SART3/KMT2A/TET3/BAZ1B/ARID4A/USP27X/RIF1/HUWE1/NCOA3/KAT6A/SETD5/KDM3B/PER1/TRRAP/SIN3A/YEATS2/PAXBP1/SIRT1/ATM/ELK4/CREBBP/JARID2/EP300/-/-/EP400/SETD1B/UBE2B/EZH1/HDAC4/BRMS1L/-/-/HCFC1/JAK2	68	39	ENSSSCG00000015288/ENSSSCG00000024253/ENSSSCG00000002344/ENSSSCG00000031821/ENSSSCG00000011417/ENSSSCG00000008080/ENSSSCG00000010928/ENSSSCG00000027115/ENSSSCG00000031159/ENSSSCG00000017310/ENSSSCG00000002526/ENSSSCG00000007248/ENSSSCG00000003580/ENSSSCG00000017268/ENSSSCG00000024373/ENSSSCG00000009946/ENSSSCG00000023324/ENSSSCG00000008292/ENSSSCG00000027342/ENSSSCG00000012305/ENSSSCG00000012328/…	29	ENSSSCG00000009047/ENSSSCG00000027594/ENSSSCG00000017744/ENSSSCG00000012434/ENSSSCG00000016842/ENSSSCG00000011081/ENSSSCG00000015952/ENSSSCG00000000457/ENSSSCG00000011917/ENSSSCG00000011760/ENSSSCG00000015215/ENSSSCG00000029478/ENSSSCG00000012649/ENSSSCG00000012727/ENSSSCG00000010226/ENSSSCG00000030423/ENSSSCG00000027211/ENSSSCG00000004432/ENSSSCG00000005073/ENSSSCG00000016395/ENSSSCG00000017983/…
BP	GO:0016570	histone modification	66/1419	338/10877	0.000426043300533221	0.115750107517425	ENSSSCG00000015288/ENSSSCG00000027594/ENSSSCG00000024253/ENSSSCG00000002344/ENSSSCG00000031821/ENSSSCG00000011417/ENSSSCG00000017744/ENSSSCG00000008080/ENSSSCG00000010928/ENSSSCG00000012434/ENSSSCG00000027115/ENSSSCG00000031159/ENSSSCG00000016842/ENSSSCG00000017310/ENSSSCG00000011081/ENSSSCG00000002526/ENSSSCG00000015952/ENSSSCG00000000457/ENSSSCG00000011917/ENSSSCG00000007248/ENSSSCG00000011760/…	RBBP5/USP16/CTCF/RIOX1/HASPIN/DCAF1/SUZ12/PHF2/KDM5B/ATRX/-/BEND3/NIPBL/KANSL1/-/RCOR1/HAT1/USP15/-/ASXL1/TBL1XR1/EYA3/PRKCA/CHEK1/CUL4B/FMR1/JMJD1C/MIER1/TRIP12/EPC2/HDAC2/SART3/KMT2A/TET3/BAZ1B/ARID4A/USP27X/RIF1/HUWE1/NCOA3/KAT6A/SETD5/KDM3B/PER1/TRRAP/SIN3A/YEATS2/PAXBP1/SIRT1/ATM/ELK4/CREBBP/JARID2/EP300/-/-/EP400/SETD1B/UBE2B/EZH1/HDAC4/BRMS1L/-/-/HCFC1/JAK2	66	39	ENSSSCG00000015288/ENSSSCG00000024253/ENSSSCG00000002344/ENSSSCG00000031821/ENSSSCG00000011417/ENSSSCG00000008080/ENSSSCG00000010928/ENSSSCG00000027115/ENSSSCG00000031159/ENSSSCG00000017310/ENSSSCG00000002526/ENSSSCG00000007248/ENSSSCG00000003580/ENSSSCG00000017268/ENSSSCG00000024373/ENSSSCG00000009946/ENSSSCG00000023324/ENSSSCG00000008292/ENSSSCG00000027342/ENSSSCG00000012305/ENSSSCG00000012328/…	27	ENSSSCG00000027594/ENSSSCG00000017744/ENSSSCG00000012434/ENSSSCG00000016842/ENSSSCG00000011081/ENSSSCG00000015952/ENSSSCG00000000457/ENSSSCG00000011917/ENSSSCG00000011760/ENSSSCG00000015215/ENSSSCG00000029478/ENSSSCG00000012727/ENSSSCG00000010226/ENSSSCG00000030423/ENSSSCG00000027211/ENSSSCG00000004432/ENSSSCG00000005073/ENSSSCG00000016395/ENSSSCG00000017983/ENSSSCG00000012037/ENSSSCG00000010235/…
BP	GO:0006281	DNA repair	62/1419	314/10877	0.000464512873323707	0.115750107517425	ENSSSCG00000024419/ENSSSCG00000023303/ENSSSCG00000008614/ENSSSCG00000021822/ENSSSCG00000006127/ENSSSCG00000004358/ENSSSCG00000003820/ENSSSCG00000027251/ENSSSCG00000008788/ENSSSCG00000025703/ENSSSCG00000007954/ENSSSCG00000009670/ENSSSCG00000023112/ENSSSCG00000023724/ENSSSCG00000015600/ENSSSCG00000008346/ENSSSCG00000002298/ENSSSCG00000005255/ENSSSCG00000027709/ENSSSCG00000022190/ENSSSCG00000037216/…	-/FIGNL1/SMC6/RNF169/NBN/ASCC3/USP1/CDC7/RFC1/REV3L/SLX4/ESCO2/PDS5A/ZBTB1/DTL/APLF/ZFYVE26/SMC5/PARP9/UBE2V2/PPP4R2/MSH6/MARF1/KLHL15/ATR/EYA3/POLE2/RAD52/CHEK1/CUL4B/TRIP12/USP47/PMS1/DNA2/POLI/PRKDC/RECQL/RIF1/HUWE1/VCAN/POLA1/TRRAP/EGFR/-/SMC1A/MCM8/SIRT1/-/ATM/NOP53/FANCC/-/PDS5B/ERCC4/SFR1/UBE2B/CXorf57/GGN/MND1/RRM2B/UVSSA/SLF1	62	22	ENSSSCG00000023303/ENSSSCG00000021822/ENSSSCG00000027251/ENSSSCG00000007954/ENSSSCG00000015600/ENSSSCG00000002298/ENSSSCG00000027709/ENSSSCG00000020931/ENSSSCG00000029168/ENSSSCG00000003580/ENSSSCG00000000754/ENSSSCG00000024373/ENSSSCG00000006274/ENSSSCG00000012328/ENSSSCG00000022240/ENSSSCG00000007606/ENSSSCG00000022126/ENSSSCG00000012325/ENSSSCG00000033654/ENSSSCG00000007881/ENSSSCG00000002957/…	40	ENSSSCG00000024419/ENSSSCG00000008614/ENSSSCG00000006127/ENSSSCG00000004358/ENSSSCG00000003820/ENSSSCG00000008788/ENSSSCG00000025703/ENSSSCG00000009670/ENSSSCG00000023112/ENSSSCG00000023724/ENSSSCG00000008346/ENSSSCG00000005255/ENSSSCG00000022190/ENSSSCG00000037216/ENSSSCG00000027652/ENSSSCG00000011679/ENSSSCG00000005008/ENSSSCG00000015215/ENSSSCG00000029478/ENSSSCG00000013402/ENSSSCG00000016045/…
BP	GO:0070232	regulation of T cell apoptotic process	10/1419	24/10877	0.00047710142782543	0.115750107517425	ENSSSCG00000006530/ENSSSCG00000003112/ENSSSCG00000005096/ENSSSCG00000017705/ENSSSCG00000005240/ENSSSCG00000002917/ENSSSCG00000035859/ENSSSCG00000008099/ENSSSCG00000037319/ENSSSCG00000021255	EFNA1/-/HIF1A/CCL5/DOCK8/NFKBID/WNT5A/ZC3H8/PDCD1/ADA	10	2	ENSSSCG00000005240/ENSSSCG00000035859	8	ENSSSCG00000006530/ENSSSCG00000003112/ENSSSCG00000005096/ENSSSCG00000017705/ENSSSCG00000002917/ENSSSCG00000008099/ENSSSCG00000037319/ENSSSCG00000021255
BP	GO:0007067	mitotic nuclear division	43/1419	200/10877	0.000559325691125348	0.128556594376021	ENSSSCG00000005403/ENSSSCG00000010625/ENSSSCG00000016346/ENSSSCG00000038185/ENSSSCG00000011731/ENSSSCG00000016925/ENSSSCG00000031821/ENSSSCG00000000693/ENSSSCG00000010471/ENSSSCG00000009434/ENSSSCG00000012642/ENSSSCG00000023112/ENSSSCG00000030443/ENSSSCG00000014969/ENSSSCG00000012434/ENSSSCG00000010457/ENSSSCG00000017308/ENSSSCG00000005255/ENSSSCG00000016842/ENSSSCG00000010357/ENSSSCG00000010912/…	SMC2/SMC3/MAD2L1BP/EREG/SMC4/PLK2/HASPIN/NCAPD2/KIF11/RGCC/STAG2/PDS5A/INTS13/-/ATRX/KIF20B/CDC27/SMC5/NIPBL/WAPL/KIF14/VPS4B/SPICE1/-/KPNB1/PIBF1/CLASP1/POGZ/CENPE/TPR/CDC14B/ABRAXAS2/SMC1A/ATM/SPC25/CENPC/HECW2/CEP126/PDS5B/GNAI1/KIF18A/SLF1/CEP57L1	43	13	ENSSSCG00000016346/ENSSSCG00000016925/ENSSSCG00000031821/ENSSSCG00000000693/ENSSSCG00000010912/ENSSSCG00000024663/ENSSSCG00000017514/ENSSSCG00000039157/ENSSSCG00000006622/ENSSSCG00000027557/ENSSSCG00000010737/ENSSSCG00000012325/ENSSSCG00000016068	30	ENSSSCG00000005403/ENSSSCG00000010625/ENSSSCG00000038185/ENSSSCG00000011731/ENSSSCG00000010471/ENSSSCG00000009434/ENSSSCG00000012642/ENSSSCG00000023112/ENSSSCG00000030443/ENSSSCG00000014969/ENSSSCG00000012434/ENSSSCG00000010457/ENSSSCG00000017308/ENSSSCG00000005255/ENSSSCG00000016842/ENSSSCG00000010357/ENSSSCG00000004893/ENSSSCG00000011917/ENSSSCG00000024722/ENSSSCG00000023296/ENSSSCG00000015576/…
BP	GO:0000226	microtubule cytoskeleton organization	71/1419	375/10877	0.000657679257119743	0.143604265792096	ENSSSCG00000011407/ENSSSCG00000006496/ENSSSCG00000010625/ENSSSCG00000003928/ENSSSCG00000009083/ENSSSCG00000009793/ENSSSCG00000014934/ENSSSCG00000016925/ENSSSCG00000015310/ENSSSCG00000006994/ENSSSCG00000012110/ENSSSCG00000010606/ENSSSCG00000024351/ENSSSCG00000010471/ENSSSCG00000009077/ENSSSCG00000008406/ENSSSCG00000012642/ENSSSCG00000030443/ENSSSCG00000028821/ENSSSCG00000014969/ENSSSCG00000027074/…	RASSF1/LMNA/SMC3/PLK3/SPRY1/CLIP1/CHORDC1/PLK2/AKAP9/PCM1/MID1/SLK/MET/KIF11/HSPA4L/CCDC88A/STAG2/INTS13/SASS6/-/FER/HAUS6/ATRX/KIF24/SENP6/TPGS1/XPO1/KIF3A/VPS4B/SPICE1/KIAA0753/GCC2/KPNB1/PIBF1/TMEM67/CLASP1/CEP250/CENPE/STARD9/TPR/CDC14B/ABRAXAS2/CAMSAP2/CCSER2/NAV3/CEP135/-/CEP350/SMC1A/MTCL1/TRIM36/NEURL1/SPC25/-/CCDC39/-/BNIP2/RASSF7/-/DEUP1/CEP126/UBE2B/GNAI1/PIH1D3/-/NAV1/CCP110/CEP120/NC…	71	23	ENSSSCG00000009083/ENSSSCG00000016925/ENSSSCG00000012110/ENSSSCG00000010984/ENSSSCG00000024663/ENSSSCG00000017890/ENSSSCG00000017514/ENSSSCG00000039157/ENSSSCG00000021138/ENSSSCG00000022039/ENSSSCG00000027557/ENSSSCG00000010737/ENSSSCG00000027314/ENSSSCG00000029249/ENSSSCG00000037530/ENSSSCG00000012325/ENSSSCG00000003684/ENSSSCG00000010603/ENSSSCG00000002440/ENSSSCG00000015814/ENSSSCG00000010915/…	48	ENSSSCG00000011407/ENSSSCG00000006496/ENSSSCG00000010625/ENSSSCG00000003928/ENSSSCG00000009793/ENSSSCG00000014934/ENSSSCG00000015310/ENSSSCG00000006994/ENSSSCG00000010606/ENSSSCG00000024351/ENSSSCG00000010471/ENSSSCG00000009077/ENSSSCG00000008406/ENSSSCG00000012642/ENSSSCG00000030443/ENSSSCG00000028821/ENSSSCG00000014969/ENSSSCG00000027074/ENSSSCG00000005173/ENSSSCG00000012434/ENSSSCG00000020702/…
BP	GO:0048511	rhythmic process	32/1419	138/10877	0.000722729215302883	0.150293261106081	ENSSSCG00000009592/ENSSSCG00000010224/ENSSSCG00000008540/ENSSSCG00000010563/ENSSSCG00000024596/ENSSSCG00000035037/ENSSSCG00000012026/ENSSSCG00000017473/ENSSSCG00000039756/ENSSSCG00000004387/ENSSSCG00000009472/ENSSSCG00000006194/ENSSSCG00000014336/ENSSSCG00000000006/ENSSSCG00000023324/ENSSSCG00000014920/ENSSSCG00000006274/ENSSSCG00000017983/ENSSSCG00000001880/ENSSSCG00000010235/ENSSSCG00000023307/…	NFIL3/EGR2/PPP1CB/BTRC/NOCT/-/ADAMTS1/TOP2A/FOXC1/FOXO3/FBXL3/NCOA2/EGR1/PPARA/KMT2A/FZD4/PRKDC/PER1/SIN3A/SIRT1/FBXW11/ATM/MAGEL2/TAF4/EP300/VGF/PHLPP1/TNFRSF11A/ASS1/RAI1/ZP3/HES7	32	19	ENSSSCG00000010224/ENSSSCG00000010563/ENSSSCG00000012026/ENSSSCG00000039756/ENSSSCG00000004387/ENSSSCG00000006194/ENSSSCG00000014336/ENSSSCG00000000006/ENSSSCG00000023324/ENSSSCG00000014920/ENSSSCG00000006274/ENSSSCG00000001880/ENSSSCG00000023307/ENSSSCG00000004835/ENSSSCG00000024694/ENSSSCG00000000068/ENSSSCG00000004896/ENSSSCG00000004898/ENSSSCG00000038164	13	ENSSSCG00000009592/ENSSSCG00000008540/ENSSSCG00000024596/ENSSSCG00000035037/ENSSSCG00000017473/ENSSSCG00000009472/ENSSSCG00000017983/ENSSSCG00000010235/ENSSSCG00000025606/ENSSSCG00000039053/ENSSSCG00000005701/ENSSSCG00000007691/ENSSSCG00000017982
BP	GO:0006310	DNA recombination	34/1419	152/10877	0.000990218075293261	0.196558287945712	ENSSSCG00000011213/ENSSSCG00000024419/ENSSSCG00000023303/ENSSSCG00000008614/ENSSSCG00000006127/ENSSSCG00000027251/ENSSSCG00000013410/ENSSSCG00000011417/ENSSSCG00000007954/ENSSSCG00000011848/ENSSSCG00000008346/ENSSSCG00000002298/ENSSSCG00000005255/ENSSSCG00000017473/ENSSSCG00000037216/ENSSSCG00000020931/ENSSSCG00000027652/ENSSSCG00000000754/ENSSSCG00000035954/ENSSSCG00000006274/ENSSSCG00000000580/…	TOP2B/-/FIGNL1/SMC6/NBN/CDC7/SWAP70/DCAF1/SLX4/TFRC/APLF/ZFYVE26/SMC5/TOP2A/PPP4R2/MSH6/KLHL15/RAD52/ATAD5/PRKDC/RECQL/RIF1/VCAN/-/MCM8/ATM/ERCC4/CCNB1IP1/SFR1/UBE2B/CXorf57/MND1/FANCM/HFM1	34	10	ENSSSCG00000023303/ENSSSCG00000027251/ENSSSCG00000013410/ENSSSCG00000011417/ENSSSCG00000007954/ENSSSCG00000002298/ENSSSCG00000020931/ENSSSCG00000000754/ENSSSCG00000006274/ENSSSCG00000007881	24	ENSSSCG00000011213/ENSSSCG00000024419/ENSSSCG00000008614/ENSSSCG00000006127/ENSSSCG00000011848/ENSSSCG00000008346/ENSSSCG00000005255/ENSSSCG00000017473/ENSSSCG00000037216/ENSSSCG00000027652/ENSSSCG00000035954/ENSSSCG00000000580/ENSSSCG00000016395/ENSSSCG00000014136/ENSSSCG00000023886/ENSSSCG00000007047/ENSSSCG00000025606/ENSSSCG00000002144/ENSSSCG00000010608/ENSSSCG00000038953/ENSSSCG00000012549/…
BP	GO:0000712	resolution of meiotic recombination intermediates	6/1419	11/10877	0.00125430053281168	0.210674247184178	ENSSSCG00000011213/ENSSSCG00000007954/ENSSSCG00000017473/ENSSSCG00000007881/ENSSSCG00000005000/ENSSSCG00000006912	TOP2B/SLX4/TOP2A/ERCC4/FANCM/HFM1	6	2	ENSSSCG00000007954/ENSSSCG00000007881	4	ENSSSCG00000011213/ENSSSCG00000017473/ENSSSCG00000005000/ENSSSCG00000006912
BP	GO:0032148	activation of protein kinase B activity	6/1419	11/10877	0.00125430053281168	0.210674247184178	ENSSSCG00000027503/ENSSSCG00000008406/ENSSSCG00000037719/ENSSSCG00000035859/ENSSSCG00000031538/ENSSSCG00000008122	OSBPL8/CCDC88A/PDPK1/WNT5A/ANG/ADRA2B	6	3	ENSSSCG00000037719/ENSSSCG00000035859/ENSSSCG00000008122	3	ENSSSCG00000027503/ENSSSCG00000008406/ENSSSCG00000031538
BP	GO:0045117	azole transport	6/1419	11/10877	0.00125430053281168	0.210674247184178	ENSSSCG00000006290/ENSSSCG00000021968/ENSSSCG00000036828/ENSSSCG00000038735/ENSSSCG00000029615/ENSSSCG00000022820	SLC19A2/SLC19A3/SNX4/SNAP23/VAMP7/VAMP8	6	1	ENSSSCG00000021968	5	ENSSSCG00000006290/ENSSSCG00000036828/ENSSSCG00000038735/ENSSSCG00000029615/ENSSSCG00000022820
BP	GO:2001224	positive regulation of neuron migration	6/1419	11/10877	0.00125430053281168	0.210674247184178	ENSSSCG00000010457/ENSSSCG00000016842/ENSSSCG00000015398/ENSSSCG00000014224/ENSSSCG00000004551/ENSSSCG00000005524	KIF20B/NIPBL/SEMA3A/SEMA6A/ZNF609/DAB2IP	6	3	ENSSSCG00000014224/ENSSSCG00000004551/ENSSSCG00000005524	3	ENSSSCG00000010457/ENSSSCG00000016842/ENSSSCG00000015398
BP	GO:0010389	regulation of G2/M transition of mitotic cell cycle	16/1419	55/10877	0.00130414060546494	0.210932667557977	ENSSSCG00000006127/ENSSSCG00000027251/ENSSSCG00000012307/ENSSSCG00000021966/ENSSSCG00000035639/ENSSSCG00000015600/ENSSSCG00000010912/ENSSSCG00000004893/ENSSSCG00000013402/ENSSSCG00000001880/ENSSSCG00000015581/ENSSSCG00000025606/ENSSSCG00000022774/ENSSSCG00000040355/ENSSSCG00000036892/ENSSSCG00000022227	NBN/CDC7/CCNB3/TOPBP1/NAE1/DTL/KIF14/VPS4B/USP47/SIN3A/CENPF/ATM/NOP53/TICRR/GPR132/BRD4	16	7	ENSSSCG00000027251/ENSSSCG00000012307/ENSSSCG00000015600/ENSSSCG00000010912/ENSSSCG00000001880/ENSSSCG00000040355/ENSSSCG00000022227	9	ENSSSCG00000006127/ENSSSCG00000021966/ENSSSCG00000035639/ENSSSCG00000004893/ENSSSCG00000013402/ENSSSCG00000015581/ENSSSCG00000025606/ENSSSCG00000022774/ENSSSCG00000036892
BP	GO:0051307	meiotic chromosome separation	7/1419	15/10877	0.00156765332374469	0.227576548646075	ENSSSCG00000011213/ENSSSCG00000004466/ENSSSCG00000007954/ENSSSCG00000017473/ENSSSCG00000007881/ENSSSCG00000005000/ENSSSCG00000006912	TOP2B/TTK/SLX4/TOP2A/ERCC4/FANCM/HFM1	7	2	ENSSSCG00000007954/ENSSSCG00000007881	5	ENSSSCG00000011213/ENSSSCG00000004466/ENSSSCG00000017473/ENSSSCG00000005000/ENSSSCG00000006912
BP	GO:0070242	thymocyte apoptotic process	7/1419	15/10877	0.00156765332374469	0.227576548646075	ENSSSCG00000006530/ENSSSCG00000003112/ENSSSCG00000005096/ENSSSCG00000002917/ENSSSCG00000035859/ENSSSCG00000008099/ENSSSCG00000021255	EFNA1/-/HIF1A/NFKBID/WNT5A/ZC3H8/ADA	7	1	ENSSSCG00000035859	6	ENSSSCG00000006530/ENSSSCG00000003112/ENSSSCG00000005096/ENSSSCG00000002917/ENSSSCG00000008099/ENSSSCG00000021255
BP	GO:0048844	artery morphogenesis	14/1419	46/10877	0.00159677578502028	0.227576548646075	ENSSSCG00000005382/ENSSSCG00000004755/ENSSSCG00000009217/ENSSSCG00000010360/ENSSSCG00000009142/ENSSSCG00000039756/ENSSSCG00000011867/ENSSSCG00000040746/ENSSSCG00000022155/ENSSSCG00000011496/ENSSSCG00000006231/ENSSSCG00000003088/ENSSSCG00000010329/ENSSSCG00000016707	TGFBR1/DLL4/PKD2/BMPR1A/SEC24B/FOXC1/MYLK/LRP2/RBPJ/ADAMTS9/CHD7/APOE/ZMIZ1/HOXA1	14	9	ENSSSCG00000009217/ENSSSCG00000009142/ENSSSCG00000039756/ENSSSCG00000011867/ENSSSCG00000040746/ENSSSCG00000011496/ENSSSCG00000006231/ENSSSCG00000010329/ENSSSCG00000016707	5	ENSSSCG00000005382/ENSSSCG00000004755/ENSSSCG00000010360/ENSSSCG00000022155/ENSSSCG00000003088
BP	GO:0060828	regulation of canonical Wnt signaling pathway	29/1419	127/10877	0.00161549645249103	0.227576548646075	ENSSSCG00000012252/ENSSSCG00000040751/ENSSSCG00000012361/ENSSSCG00000010563/ENSSSCG00000036381/ENSSSCG00000030957/ENSSSCG00000025028/ENSSSCG00000013174/ENSSSCG00000016140/ENSSSCG00000034491/ENSSSCG00000004387/ENSSSCG00000030820/ENSSSCG00000014336/ENSSSCG00000035859/ENSSSCG00000009474/ENSSSCG00000015507/ENSSSCG00000009007/ENSSSCG00000008382/ENSSSCG00000022155/ENSSSCG00000011313/ENSSSCG00000009971/…	DDX3X/DDIT3/AMER1/BTRC/RBMS3/NFKB1/-/CTNND1/FZD5/PRICKLE1/FOXO3/STK4/EGR1/WNT5A/SCEL/TNN/TMEM131L/USP34/RBPJ/LIMD1/ZNRF3/FAM53B/DAB2IP/NRARP/RNF146/PRKN/APOE/TCF7L2/CTHRC1	29	18	ENSSSCG00000012361/ENSSSCG00000010563/ENSSSCG00000030957/ENSSSCG00000013174/ENSSSCG00000016140/ENSSSCG00000034491/ENSSSCG00000004387/ENSSSCG00000030820/ENSSSCG00000014336/ENSSSCG00000035859/ENSSSCG00000015507/ENSSSCG00000009007/ENSSSCG00000011313/ENSSSCG00000009971/ENSSSCG00000010732/ENSSSCG00000005524/ENSSSCG00000004032/ENSSSCG00000010638	11	ENSSSCG00000012252/ENSSSCG00000040751/ENSSSCG00000036381/ENSSSCG00000025028/ENSSSCG00000009474/ENSSSCG00000008382/ENSSSCG00000022155/ENSSSCG00000005844/ENSSSCG00000004217/ENSSSCG00000003088/ENSSSCG00000006051
BP	GO:0080135	regulation of cellular response to stress	71/1419	388/10877	0.0017056386713327	0.232766377428435	ENSSSCG00000022689/ENSSSCG00000005385/ENSSSCG00000005096/ENSSSCG00000004163/ENSSSCG00000013312/ENSSSCG00000031882/ENSSSCG00000040663/ENSSSCG00000023303/ENSSSCG00000033228/ENSSSCG00000032613/ENSSSCG00000021822/ENSSSCG00000003155/ENSSSCG00000003820/ENSSSCG00000014934/ENSSSCG00000015541/ENSSSCG00000015801/ENSSSCG00000011822/ENSSSCG00000004222/ENSSSCG00000012110/ENSSSCG00000024351/ENSSSCG00000011765/…	GADD45B/NR4A3/HIF1A/BCLAF1/HIPK3/PNPT1/HERPUD1/FIGNL1/SPAG9/SNAI1/RNF169/PPP1R15A/USP1/CHORDC1/IER5/TLR3/OPA1/NCOA7/MID1/MET/USP13/BMPR1A/VPS13C/GADD45G/CTGF/KLF4/TMEM33/ZNF277/PARP9/PPP4R2/FZD5/SKIL/OXR1/PLCB1/PBK/KLHL15/ATR/EYA3/RAD52/PDCD10/FMR1/TRIP12/USP47/NME5/MAP3K4/WNT5A/FZD4/RIF1/SPRED2/NOD2/EIF2AK2/EGFR/SVIP/SIRT1/USP25/RPL26/NOL3/ATM/BAD/SASH1/LRIG2/HIPK2/DAB2IP/FAS/ERCC4/PRKN/CXorf57/…	71	26	ENSSSCG00000023303/ENSSSCG00000021822/ENSSSCG00000012110/ENSSSCG00000011765/ENSSSCG00000004192/ENSSSCG00000027709/ENSSSCG00000016140/ENSSSCG00000003580/ENSSSCG00000000754/ENSSSCG00000024373/ENSSSCG00000004037/ENSSSCG00000035859/ENSSSCG00000014920/ENSSSCG00000008357/ENSSSCG00000038073/ENSSSCG00000022126/ENSSSCG00000033175/ENSSSCG00000034581/ENSSSCG00000026733/ENSSSCG00000005524/ENSSSCG00000010448/…	45	ENSSSCG00000022689/ENSSSCG00000005385/ENSSSCG00000005096/ENSSSCG00000004163/ENSSSCG00000013312/ENSSSCG00000031882/ENSSSCG00000040663/ENSSSCG00000033228/ENSSSCG00000032613/ENSSSCG00000003155/ENSSSCG00000003820/ENSSSCG00000014934/ENSSSCG00000015541/ENSSSCG00000015801/ENSSSCG00000011822/ENSSSCG00000004222/ENSSSCG00000024351/ENSSSCG00000010360/ENSSSCG00000036431/ENSSSCG00000035249/ENSSSCG00000005437/…
BP	GO:0010564	regulation of cell cycle process	69/1419	376/10877	0.00182570056683796	0.241601041678224	ENSSSCG00000007351/ENSSSCG00000012252/ENSSSCG00000010625/ENSSSCG00000016291/ENSSSCG00000016346/ENSSSCG00000038185/ENSSSCG00000003928/ENSSSCG00000006127/ENSSSCG00000014934/ENSSSCG00000027251/ENSSSCG00000016925/ENSSSCG00000012307/ENSSSCG00000004466/ENSSSCG00000021966/ENSSSCG00000010471/ENSSSCG00000005267/ENSSSCG00000035746/ENSSSCG00000009434/ENSSSCG00000012642/ENSSSCG00000035639/ENSSSCG00000009217/…	FAM83D/DDX3X/SMC3/GIGYF2/MAD2L1BP/EREG/PLK3/NBN/CHORDC1/CDC7/PLK2/CCNB3/TTK/TOPBP1/KIF11/ANXA1/ECT2/RGCC/STAG2/NAE1/PKD2/DTL/PIK3C3/ATRX/KIF20B/CDC27/SENP6/SMC5/CDKN1A/WAPL/PLCB1/XPO1/KIF14/VPS4B/SPICE1/PIK3R4/CUL4B/TMEM67/ATAD5/GPR3/ANKRD17/HMGN5/CENPE/USP47/WNT5A/ATP2B4/TPR/CDC14B/PRKDC/POU4F1/PRKAR2A/EGFR/SIN3A/SMC1A/CENPF/RPL26/ATM/NOP53/TICRR/-/HECW2/DAB2IP/UBE2B/GNAI1/CCP110/CEP120/GPR132/S…	69	25	ENSSSCG00000007351/ENSSSCG00000016291/ENSSSCG00000016346/ENSSSCG00000027251/ENSSSCG00000016925/ENSSSCG00000012307/ENSSSCG00000009217/ENSSSCG00000015600/ENSSSCG00000010912/ENSSSCG00000024663/ENSSSCG00000029094/ENSSSCG00000024592/ENSSSCG00000035859/ENSSSCG00000015273/ENSSSCG00000027557/ENSSSCG00000006274/ENSSSCG00000025334/ENSSSCG00000011363/ENSSSCG00000022126/ENSSSCG00000001880/ENSSSCG00000012325/…	44	ENSSSCG00000012252/ENSSSCG00000010625/ENSSSCG00000038185/ENSSSCG00000003928/ENSSSCG00000006127/ENSSSCG00000014934/ENSSSCG00000004466/ENSSSCG00000021966/ENSSSCG00000010471/ENSSSCG00000005267/ENSSSCG00000035746/ENSSSCG00000009434/ENSSSCG00000012642/ENSSSCG00000035639/ENSSSCG00000003749/ENSSSCG00000012434/ENSSSCG00000010457/ENSSSCG00000017308/ENSSSCG00000020702/ENSSSCG00000005255/ENSSSCG00000001565/…
BP	GO:0022613	ribonucleoprotein complex biogenesis	58/1419	306/10877	0.00192229230280996	0.246249925684604	ENSSSCG00000006727/ENSSSCG00000012252/ENSSSCG00000016911/ENSSSCG00000011395/ENSSSCG00000006033/ENSSSCG00000000806/ENSSSCG00000022225/ENSSSCG00000017033/ENSSSCG00000009043/ENSSSCG00000024596/ENSSSCG00000006983/ENSSSCG00000006504/ENSSSCG00000008990/ENSSSCG00000017066/ENSSSCG00000008974/ENSSSCG00000028225/ENSSSCG00000001024/ENSSSCG00000034572/ENSSSCG00000021466/ENSSSCG00000028228/ENSSSCG00000011679/…	WDR3/DDX3X/SKIV2L2/RBM5/EIF3E/SCAF11/NOP58/SLU7/ABCE1/NOCT/CNOT7/KHDC4/MRPL1/GEMIN5/-/DICER1/RIOK1/MPHOSPH6/BMT2/XPO1/ATR/PRPF39/NMD3/NOA1/RPS21/SART3/EMG1/RPS27/MDN1/RPS15/RPS10/HEATR1/RPS16/-/LIMD1/PTBP2/-/RPL35/SRSF10/-/RPL26/NOL8/-/DDX52/NOL3/ATM/SNRPD2/NOP53/RPS19/-/LSM3/EXOSC4/WDR36/EXOSC8/-/C9orf72/DIS3L/ATXN2	58	13	ENSSSCG00000006727/ENSSSCG00000011395/ENSSSCG00000006504/ENSSSCG00000017066/ENSSSCG00000028225/ENSSSCG00000001024/ENSSSCG00000025792/ENSSSCG00000009946/ENSSSCG00000004328/ENSSSCG00000010145/ENSSSCG00000011313/ENSSSCG00000004941/ENSSSCG00000009834	45	ENSSSCG00000012252/ENSSSCG00000016911/ENSSSCG00000006033/ENSSSCG00000000806/ENSSSCG00000022225/ENSSSCG00000017033/ENSSSCG00000009043/ENSSSCG00000024596/ENSSSCG00000006983/ENSSSCG00000008990/ENSSSCG00000008974/ENSSSCG00000034572/ENSSSCG00000021466/ENSSSCG00000028228/ENSSSCG00000011679/ENSSSCG00000004997/ENSSSCG00000022952/ENSSSCG00000002529/ENSSSCG00000026812/ENSSSCG00000031838/ENSSSCG00000033169/…
BP	GO:0006302	double-strand break repair	33/1419	152/10877	0.00197360828920567	0.246249925684604	ENSSSCG00000024419/ENSSSCG00000023303/ENSSSCG00000008614/ENSSSCG00000021822/ENSSSCG00000006127/ENSSSCG00000027251/ENSSSCG00000007954/ENSSSCG00000009670/ENSSSCG00000008346/ENSSSCG00000002298/ENSSSCG00000005255/ENSSSCG00000027709/ENSSSCG00000022190/ENSSSCG00000037216/ENSSSCG00000029168/ENSSSCG00000027652/ENSSSCG00000003580/ENSSSCG00000000754/ENSSSCG00000024373/ENSSSCG00000010240/ENSSSCG00000006274/…	-/FIGNL1/SMC6/RNF169/NBN/CDC7/SLX4/ESCO2/APLF/ZFYVE26/SMC5/PARP9/UBE2V2/PPP4R2/MARF1/KLHL15/EYA3/RAD52/TRIP12/DNA2/PRKDC/RECQL/RIF1/VCAN/POLA1/MCM8/ATM/ERCC4/SFR1/CXorf57/GGN/MND1/SLF1	33	14	ENSSSCG00000023303/ENSSSCG00000021822/ENSSSCG00000027251/ENSSSCG00000007954/ENSSSCG00000002298/ENSSSCG00000027709/ENSSSCG00000029168/ENSSSCG00000003580/ENSSSCG00000000754/ENSSSCG00000024373/ENSSSCG00000006274/ENSSSCG00000022240/ENSSSCG00000007881/ENSSSCG00000002957	19	ENSSSCG00000024419/ENSSSCG00000008614/ENSSSCG00000006127/ENSSSCG00000009670/ENSSSCG00000008346/ENSSSCG00000005255/ENSSSCG00000022190/ENSSSCG00000037216/ENSSSCG00000027652/ENSSSCG00000010240/ENSSSCG00000000580/ENSSSCG00000016395/ENSSSCG00000014136/ENSSSCG00000007047/ENSSSCG00000025606/ENSSSCG00000010608/ENSSSCG00000012549/ENSSSCG00000009009/ENSSSCG00000014163
BP	GO:0007346	regulation of mitotic cell cycle	65/1419	352/10877	0.00208644028411713	0.252666883720842	ENSSSCG00000011213/ENSSSCG00000012252/ENSSSCG00000031882/ENSSSCG00000010625/ENSSSCG00000016291/ENSSSCG00000016346/ENSSSCG00000038185/ENSSSCG00000006127/ENSSSCG00000027251/ENSSSCG00000016925/ENSSSCG00000012307/ENSSSCG00000004466/ENSSSCG00000021966/ENSSSCG00000010606/ENSSSCG00000010471/ENSSSCG00000005267/ENSSSCG00000009434/ENSSSCG00000012642/ENSSSCG00000035639/ENSSSCG00000009217/ENSSSCG00000015600/…	TOP2B/DDX3X/PNPT1/SMC3/GIGYF2/MAD2L1BP/EREG/NBN/CDC7/PLK2/CCNB3/TTK/TOPBP1/SLK/KIF11/ANXA1/RGCC/STAG2/NAE1/PKD2/DTL/INTS13/ATRX/KIF20B/CDC27/KNTC1/-/SMC5/TOP2A/CDKN1A/FOXC1/PLCB1/KIF14/VPS4B/PTPN3/STK4/PRKCA/CHEK1/CUL4B/MAP3K14/ATAD5/ANKRD17/CENPE/USP47/TPR/CDC14B/PRKDC/EIF4E/MAP3K8/MAP4K1/EGFR/SIN3A/SMC1A/CENPF/SIRT1/RPL26/ATM/NOP53/TICRR/-/HECW2/GNAI1/GPR132/SLF1/BRD4	65	21	ENSSSCG00000016291/ENSSSCG00000016346/ENSSSCG00000027251/ENSSSCG00000016925/ENSSSCG00000012307/ENSSSCG00000009217/ENSSSCG00000015600/ENSSSCG00000039756/ENSSSCG00000010912/ENSSSCG00000005449/ENSSSCG00000030820/ENSSSCG00000017268/ENSSSCG00000024592/ENSSSCG00000027557/ENSSSCG00000006274/ENSSSCG00000022126/ENSSSCG00000001880/ENSSSCG00000012325/ENSSSCG00000040355/ENSSSCG00000016068/ENSSSCG00000022227	44	ENSSSCG00000011213/ENSSSCG00000012252/ENSSSCG00000031882/ENSSSCG00000010625/ENSSSCG00000038185/ENSSSCG00000006127/ENSSSCG00000004466/ENSSSCG00000021966/ENSSSCG00000010606/ENSSSCG00000010471/ENSSSCG00000005267/ENSSSCG00000009434/ENSSSCG00000012642/ENSSSCG00000035639/ENSSSCG00000030443/ENSSSCG00000012434/ENSSSCG00000010457/ENSSSCG00000017308/ENSSSCG00000039546/ENSSSCG00000035037/ENSSSCG00000005255/…
BP	GO:0007099	centriole replication	9/1419	24/10877	0.00221577948192309	0.252666883720842	ENSSSCG00000016925/ENSSSCG00000009077/ENSSSCG00000028821/ENSSSCG00000004893/ENSSSCG00000024663/ENSSSCG00000017890/ENSSSCG00000022283/ENSSSCG00000014943/ENSSSCG00000023829	PLK2/HSPA4L/SASS6/VPS4B/SPICE1/KIAA0753/CEP135/DEUP1/CCP110	9	3	ENSSSCG00000016925/ENSSSCG00000024663/ENSSSCG00000017890	6	ENSSSCG00000009077/ENSSSCG00000028821/ENSSSCG00000004893/ENSSSCG00000022283/ENSSSCG00000014943/ENSSSCG00000023829
BP	GO:0070230	positive regulation of lymphocyte apoptotic process	6/1419	12/10877	0.00223282823819443	0.252666883720842	ENSSSCG00000003112/ENSSSCG00000017705/ENSSSCG00000002917/ENSSSCG00000035859/ENSSSCG00000008099/ENSSSCG00000037319	-/CCL5/NFKBID/WNT5A/ZC3H8/PDCD1	6	1	ENSSSCG00000035859	5	ENSSSCG00000003112/ENSSSCG00000017705/ENSSSCG00000002917/ENSSSCG00000008099/ENSSSCG00000037319
BP	GO:0009792	embryo development ending in birth or egg hatching	78/1419	438/10877	0.0022564709102617	0.252666883720842	ENSSSCG00000030165/ENSSSCG00000010922/ENSSSCG00000005096/ENSSSCG00000004595/ENSSSCG00000032613/ENSSSCG00000006127/ENSSSCG00000006646/ENSSSCG00000005382/ENSSSCG00000007520/ENSSSCG00000015874/ENSSSCG00000002254/ENSSSCG00000015590/ENSSSCG00000021597/ENSSSCG00000009217/ENSSSCG00000010360/ENSSSCG00000006725/ENSSSCG00000010457/ENSSSCG00000012583/ENSSSCG00000003532/ENSSSCG00000029385/ENSSSCG00000010189/…	MAFF/ELF3/HIF1A/ADAM10/SNAI1/NBN/ARNT/TGFBR1/GNAS/ACVR1/NR2F2/FLVCR1/PHLDA2/PKD2/BMPR1A/TBX15/KIF20B/ACSL4/LUZP1/LIAS/NUP133/ARHGAP35/SEC24B/FOXC1/FZD5/NIPBL/SEMA3C/SKIL/-/KIF3A/PRICKLE1/STK4/SALL2/CHEK1/KRT8/HOXD4/FOSL1/WNT5A/HOXD3/EMG1/CENPU/PRKDC/GPR161/MBTD1/LRP2/RBPJ/EGFR/SIN3A/ACVR1B/KIAA1217/HEG1/ATM/GJB5/SF3B6/CHD7/-/BNIP2/EP300/SHROOM3/ARID1A/IRX5/NRARP/KIDINS220/ADA/CCNB1IP1/TANC2/UBE2B…	78	38	ENSSSCG00000006646/ENSSSCG00000007520/ENSSSCG00000015874/ENSSSCG00000002254/ENSSSCG00000015590/ENSSSCG00000009217/ENSSSCG00000006725/ENSSSCG00000003532/ENSSSCG00000010189/ENSSSCG00000003107/ENSSSCG00000009142/ENSSSCG00000039756/ENSSSCG00000016140/ENSSSCG00000034491/ENSSSCG00000030820/ENSSSCG00000022705/ENSSSCG00000015984/ENSSSCG00000035859/ENSSSCG00000015985/ENSSSCG00000006274/ENSSSCG00000006302/…	40	ENSSSCG00000030165/ENSSSCG00000010922/ENSSSCG00000005096/ENSSSCG00000004595/ENSSSCG00000032613/ENSSSCG00000006127/ENSSSCG00000005382/ENSSSCG00000021597/ENSSSCG00000010360/ENSSSCG00000010457/ENSSSCG00000012583/ENSSSCG00000029385/ENSSSCG00000016842/ENSSSCG00000023784/ENSSSCG00000011746/ENSSSCG00000011081/ENSSSCG00000014283/ENSSSCG00000015215/ENSSSCG00000000252/ENSSSCG00000012967/ENSSSCG00000026812/…
BP	GO:0002684	positive regulation of immune system process	84/1419	480/10877	0.00259729300408018	0.283077343300881	ENSSSCG00000001952/ENSSSCG00000027529/ENSSSCG00000005385/ENSSSCG00000005096/ENSSSCG00000016916/ENSSSCG00000014277/ENSSSCG00000004595/ENSSSCG00000038185/ENSSSCG00000017705/ENSSSCG00000012713/ENSSSCG00000015801/ENSSSCG00000002383/ENSSSCG00000007520/ENSSSCG00000016929/ENSSSCG00000036828/ENSSSCG00000016254/ENSSSCG00000005240/ENSSSCG00000013410/ENSSSCG00000003582/ENSSSCG00000012131/ENSSSCG00000016954/…	NFKBIA/BIRC3/NR4A3/HIF1A/IL6ST/IRF1/ADAM10/EREG/CCL5/ATP11C/TLR3/FOS/GNAS/PDE4D/SNX4/CCL20/DOCK8/SWAP70/SMPDL3B/MOSPD2/ERBIN/ELF1/ANXA1/RGCC/TFRC/ZBTB1/FER/PARP9/PTPRJ/CCR7/CDKN1A/FOXC1/ANO6/FZD5/PPP2R3C/MSH6/-/TNFAIP3/VAMP7/FOXO3/AP1G1/PDPK1/ISG15/SLC39A10/CXCL8/ATAD5/-/ANKRD17/CYBA/SEMA7A/WNT5A/ATXN1L/CSF1/PRKDC/POU4F1/RIF1/CXCL2/STX7/EFNB3/NOD2/SIN3A/POLR3G/PUM1/ACVR1B/LGALS1/AQP3/SIRT1/CD320/…	84	30	ENSSSCG00000002383/ENSSSCG00000007520/ENSSSCG00000005240/ENSSSCG00000013410/ENSSSCG00000009440/ENSSSCG00000027709/ENSSSCG00000023709/ENSSSCG00000039756/ENSSSCG00000000804/ENSSSCG00000016140/ENSSSCG00000020931/ENSSSCG00000004387/ENSSSCG00000002740/ENSSSCG00000037719/ENSSSCG00000024592/ENSSSCG00000035859/ENSSSCG00000038917/ENSSSCG00000006274/ENSSSCG00000025334/ENSSSCG00000017948/ENSSSCG00000038073/…	54	ENSSSCG00000001952/ENSSSCG00000027529/ENSSSCG00000005385/ENSSSCG00000005096/ENSSSCG00000016916/ENSSSCG00000014277/ENSSSCG00000004595/ENSSSCG00000038185/ENSSSCG00000017705/ENSSSCG00000012713/ENSSSCG00000015801/ENSSSCG00000016929/ENSSSCG00000036828/ENSSSCG00000016254/ENSSSCG00000003582/ENSSSCG00000012131/ENSSSCG00000016954/ENSSSCG00000005267/ENSSSCG00000009434/ENSSSCG00000011848/ENSSSCG00000023724/…
BP	GO:0043009	chordate embryonic development	77/1419	434/10877	0.00265769889519948	0.283077343300881	ENSSSCG00000030165/ENSSSCG00000010922/ENSSSCG00000005096/ENSSSCG00000004595/ENSSSCG00000032613/ENSSSCG00000006127/ENSSSCG00000006646/ENSSSCG00000005382/ENSSSCG00000007520/ENSSSCG00000015874/ENSSSCG00000002254/ENSSSCG00000015590/ENSSSCG00000021597/ENSSSCG00000009217/ENSSSCG00000010360/ENSSSCG00000006725/ENSSSCG00000010457/ENSSSCG00000003532/ENSSSCG00000029385/ENSSSCG00000010189/ENSSSCG00000003107/…	MAFF/ELF3/HIF1A/ADAM10/SNAI1/NBN/ARNT/TGFBR1/GNAS/ACVR1/NR2F2/FLVCR1/PHLDA2/PKD2/BMPR1A/TBX15/KIF20B/LUZP1/LIAS/NUP133/ARHGAP35/SEC24B/FOXC1/FZD5/NIPBL/SEMA3C/SKIL/-/KIF3A/PRICKLE1/STK4/SALL2/CHEK1/KRT8/HOXD4/FOSL1/WNT5A/HOXD3/EMG1/CENPU/PRKDC/GPR161/MBTD1/LRP2/RBPJ/EGFR/SIN3A/ACVR1B/KIAA1217/HEG1/ATM/GJB5/SF3B6/CHD7/-/BNIP2/EP300/SHROOM3/ARID1A/IRX5/NRARP/KIDINS220/ADA/CCNB1IP1/TANC2/UBE2B/MED21…	77	38	ENSSSCG00000006646/ENSSSCG00000007520/ENSSSCG00000015874/ENSSSCG00000002254/ENSSSCG00000015590/ENSSSCG00000009217/ENSSSCG00000006725/ENSSSCG00000003532/ENSSSCG00000010189/ENSSSCG00000003107/ENSSSCG00000009142/ENSSSCG00000039756/ENSSSCG00000016140/ENSSSCG00000034491/ENSSSCG00000030820/ENSSSCG00000022705/ENSSSCG00000015984/ENSSSCG00000035859/ENSSSCG00000015985/ENSSSCG00000006274/ENSSSCG00000006302/…	39	ENSSSCG00000030165/ENSSSCG00000010922/ENSSSCG00000005096/ENSSSCG00000004595/ENSSSCG00000032613/ENSSSCG00000006127/ENSSSCG00000005382/ENSSSCG00000021597/ENSSSCG00000010360/ENSSSCG00000010457/ENSSSCG00000029385/ENSSSCG00000016842/ENSSSCG00000023784/ENSSSCG00000011746/ENSSSCG00000011081/ENSSSCG00000014283/ENSSSCG00000015215/ENSSSCG00000000252/ENSSSCG00000012967/ENSSSCG00000026812/ENSSSCG00000015785/…
BP	GO:0045132	meiotic chromosome segregation	17/1419	64/10877	0.0027646674009338	0.287459584282807	ENSSSCG00000011213/ENSSSCG00000005403/ENSSSCG00000011731/ENSSSCG00000004466/ENSSSCG00000007954/ENSSSCG00000016092/ENSSSCG00000017473/ENSSSCG00000010357/ENSSSCG00000010779/ENSSSCG00000025606/ENSSSCG00000008921/ENSSSCG00000007881/ENSSSCG00000002144/ENSSSCG00000038953/ENSSSCG00000005000/ENSSSCG00000006095/ENSSSCG00000006912	TOP2B/SMC2/SMC4/TTK/SLX4/SGO2/TOP2A/WAPL/SYCE1/ATM/CENPC/ERCC4/CCNB1IP1/UBE2B/FANCM/CCNE2/HFM1	17	2	ENSSSCG00000007954/ENSSSCG00000007881	15	ENSSSCG00000011213/ENSSSCG00000005403/ENSSSCG00000011731/ENSSSCG00000004466/ENSSSCG00000016092/ENSSSCG00000017473/ENSSSCG00000010357/ENSSSCG00000010779/ENSSSCG00000025606/ENSSSCG00000008921/ENSSSCG00000002144/ENSSSCG00000038953/ENSSSCG00000005000/ENSSSCG00000006095/ENSSSCG00000006912
BP	GO:0098534	centriole assembly	9/1419	25/10877	0.00306672525603853	0.311450911467913	ENSSSCG00000016925/ENSSSCG00000009077/ENSSSCG00000028821/ENSSSCG00000004893/ENSSSCG00000024663/ENSSSCG00000017890/ENSSSCG00000022283/ENSSSCG00000014943/ENSSSCG00000023829	PLK2/HSPA4L/SASS6/VPS4B/SPICE1/KIAA0753/CEP135/DEUP1/CCP110	9	3	ENSSSCG00000016925/ENSSSCG00000024663/ENSSSCG00000017890	6	ENSSSCG00000009077/ENSSSCG00000028821/ENSSSCG00000004893/ENSSSCG00000022283/ENSSSCG00000014943/ENSSSCG00000023829
BP	GO:0003222	ventricular trabecula myocardium morphogenesis	6/1419	13/10877	0.00369214749998303	0.327810931253008	ENSSSCG00000005382/ENSSSCG00000004755/ENSSSCG00000010360/ENSSSCG00000022155/ENSSSCG00000011859/ENSSSCG00000006231	TGFBR1/DLL4/BMPR1A/RBPJ/HEG1/CHD7	6	2	ENSSSCG00000011859/ENSSSCG00000006231	4	ENSSSCG00000005382/ENSSSCG00000004755/ENSSSCG00000010360/ENSSSCG00000022155
BP	GO:2000106	regulation of leukocyte apoptotic process	14/1419	50/10877	0.0037811019999561	0.327810931253008	ENSSSCG00000006530/ENSSSCG00000005385/ENSSSCG00000003112/ENSSSCG00000005096/ENSSSCG00000017705/ENSSSCG00000005240/ENSSSCG00000005267/ENSSSCG00000002917/ENSSSCG00000031954/ENSSSCG00000035859/ENSSSCG00000008099/ENSSSCG00000010235/ENSSSCG00000037319/ENSSSCG00000021255	EFNA1/NR4A3/-/HIF1A/CCL5/DOCK8/ANXA1/NFKBID/SLC39A10/WNT5A/ZC3H8/SIRT1/PDCD1/ADA	14	2	ENSSSCG00000005240/ENSSSCG00000035859	12	ENSSSCG00000006530/ENSSSCG00000005385/ENSSSCG00000003112/ENSSSCG00000005096/ENSSSCG00000017705/ENSSSCG00000005267/ENSSSCG00000002917/ENSSSCG00000031954/ENSSSCG00000008099/ENSSSCG00000010235/ENSSSCG00000037319/ENSSSCG00000021255
BP	GO:0045833	negative regulation of lipid metabolic process	13/1419	45/10877	0.0038575426336977	0.327810931253008	ENSSSCG00000011853/ENSSSCG00000032613/ENSSSCG00000030957/ENSSSCG00000035037/ENSSSCG00000024722/ENSSSCG00000016044/ENSSSCG00000033766/ENSSSCG00000010235/ENSSSCG00000005524/ENSSSCG00000038700/ENSSSCG00000034090/ENSSSCG00000003088/ENSSSCG00000024644	RUBCN/SNAI1/NFKB1/-/PIBF1/-/ETFBKMT/SIRT1/DAB2IP/FMC1/CRTC3/APOE/CIDEA	13	5	ENSSSCG00000011853/ENSSSCG00000030957/ENSSSCG00000033766/ENSSSCG00000005524/ENSSSCG00000034090	8	ENSSSCG00000032613/ENSSSCG00000035037/ENSSSCG00000024722/ENSSSCG00000016044/ENSSSCG00000010235/ENSSSCG00000038700/ENSSSCG00000003088/ENSSSCG00000024644
BP	GO:0000086	G2/M transition of mitotic cell cycle	19/1419	77/10877	0.00397375172171244	0.327810931253008	ENSSSCG00000006127/ENSSSCG00000027251/ENSSSCG00000012307/ENSSSCG00000021966/ENSSSCG00000035639/ENSSSCG00000015600/ENSSSCG00000001565/ENSSSCG00000007056/ENSSSCG00000010912/ENSSSCG00000004893/ENSSSCG00000015215/ENSSSCG00000013402/ENSSSCG00000001880/ENSSSCG00000015581/ENSSSCG00000025606/ENSSSCG00000022774/ENSSSCG00000040355/ENSSSCG00000036892/ENSSSCG00000022227	NBN/CDC7/CCNB3/TOPBP1/NAE1/DTL/CDKN1A/PLCB1/KIF14/VPS4B/CHEK1/USP47/SIN3A/CENPF/ATM/NOP53/TICRR/GPR132/BRD4	19	7	ENSSSCG00000027251/ENSSSCG00000012307/ENSSSCG00000015600/ENSSSCG00000010912/ENSSSCG00000001880/ENSSSCG00000040355/ENSSSCG00000022227	12	ENSSSCG00000006127/ENSSSCG00000021966/ENSSSCG00000035639/ENSSSCG00000001565/ENSSSCG00000007056/ENSSSCG00000004893/ENSSSCG00000015215/ENSSSCG00000013402/ENSSSCG00000015581/ENSSSCG00000025606/ENSSSCG00000022774/ENSSSCG00000036892
BP	GO:0060840	artery development	16/1419	61/10877	0.0041654878366983	0.327810931253008	ENSSSCG00000005382/ENSSSCG00000004755/ENSSSCG00000009217/ENSSSCG00000010360/ENSSSCG00000003532/ENSSSCG00000009142/ENSSSCG00000039756/ENSSSCG00000034491/ENSSSCG00000011867/ENSSSCG00000040746/ENSSSCG00000022155/ENSSSCG00000011496/ENSSSCG00000006231/ENSSSCG00000003088/ENSSSCG00000010329/ENSSSCG00000016707	TGFBR1/DLL4/PKD2/BMPR1A/LUZP1/SEC24B/FOXC1/PRICKLE1/MYLK/LRP2/RBPJ/ADAMTS9/CHD7/APOE/ZMIZ1/HOXA1	16	11	ENSSSCG00000009217/ENSSSCG00000003532/ENSSSCG00000009142/ENSSSCG00000039756/ENSSSCG00000034491/ENSSSCG00000011867/ENSSSCG00000040746/ENSSSCG00000011496/ENSSSCG00000006231/ENSSSCG00000010329/ENSSSCG00000016707	5	ENSSSCG00000005382/ENSSSCG00000004755/ENSSSCG00000010360/ENSSSCG00000022155/ENSSSCG00000003088
BP	GO:0043900	regulation of multi-organism process	47/1419	246/10877	0.00420227380436836	0.327810931253008	ENSSSCG00000012252/ENSSSCG00000010625/ENSSSCG00000013125/ENSSSCG00000017705/ENSSSCG00000006983/ENSSSCG00000005305/ENSSSCG00000017473/ENSSSCG00000027709/ENSSSCG00000031498/ENSSSCG00000004154/ENSSSCG00000007056/ENSSSCG00000004893/ENSSSCG00000000272/ENSSSCG00000009055/ENSSSCG00000038443/ENSSSCG00000017268/ENSSSCG00000028536/ENSSSCG00000008953/ENSSSCG00000012727/ENSSSCG00000003576/ENSSSCG00000024592/…	DDX3X/SMC3/OSBP/CCL5/CNOT7/UNC13B/TOP2A/PARP9/PPP2R3C/TNFAIP3/PLCB1/VPS4B/SP1/ELMOD2/ZNF639/PRKCA/LHFPL2/CXCL8/FMR1/GPR3/ANKRD17/CYBA/YTHDC2/PRKAR2A/CHD1/EIF2AK2/SIN3A/MVB12A/PUM1/ACVR1B/LGALS1/C19orf66/BAD/LY96/NOP53/SASH1/EP300/-/LARP1/ADA/RNF216/PRKN/IFIT5/APOE/BPIFA1/ZP3/CD180	47	17	ENSSSCG00000013125/ENSSSCG00000005305/ENSSSCG00000027709/ENSSSCG00000000272/ENSSSCG00000017268/ENSSSCG00000028536/ENSSSCG00000024592/ENSSSCG00000011363/ENSSSCG00000001880/ENSSSCG00000003591/ENSSSCG00000000233/ENSSSCG00000033175/ENSSSCG00000000068/ENSSSCG00000017069/ENSSSCG00000021285/ENSSSCG00000004032/ENSSSCG00000016957	30	ENSSSCG00000012252/ENSSSCG00000010625/ENSSSCG00000017705/ENSSSCG00000006983/ENSSSCG00000017473/ENSSSCG00000031498/ENSSSCG00000004154/ENSSSCG00000007056/ENSSSCG00000004893/ENSSSCG00000009055/ENSSSCG00000038443/ENSSSCG00000008953/ENSSSCG00000012727/ENSSSCG00000003576/ENSSSCG00000031493/ENSSSCG00000014211/ENSSSCG00000014177/ENSSSCG00000008496/ENSSSCG00000036568/ENSSSCG00000033854/ENSSSCG00000013664/…
BP	GO:0009607	response to biotic stimulus	77/1419	442/10877	0.00432270661564531	0.327810931253008	ENSSSCG00000001952/ENSSSCG00000006084/ENSSSCG00000012252/ENSSSCG00000035355/ENSSSCG00000014277/ENSSSCG00000017705/ENSSSCG00000031262/ENSSSCG00000031888/ENSSSCG00000015801/ENSSSCG00000011510/ENSSSCG00000040751/ENSSSCG00000016929/ENSSSCG00000036381/ENSSSCG00000016954/ENSSSCG00000030957/ENSSSCG00000007954/ENSSSCG00000024916/ENSSSCG00000024596/ENSSSCG00000006983/ENSSSCG00000015782/ENSSSCG00000027074/…	NFKBIA/MTDH/DDX3X/F2R/IRF1/CCL5/TXNIP/DDIT4/TLR3/TMF1/DDIT3/PDE4D/RBMS3/ERBIN/NFKB1/SLX4/DHX36/NOCT/CNOT7/IRF2/FER/UNC13B/LIAS/PARP9/PTGFR/CCR7/FZD5/PPP2R3C/TNFAIP3/ELMOD2/SERINC5/ISG15/-/PRKCA/MAP3K14/CXCL8/KRT8/-/FMR1/IFI44L/ANKRD17/CYBA/WNT5A/-/S100A12/CXCL2/PRKD1/RBPJ/CHUK/NOD2/MAPK11/PDCD4/EIF2AK2/SIN3A/PUM1/SMC1A/C19orf66/MX2/RPS15A/GSDME/BAD/LY96/NOP53/SASH1/RPS19/EXOSC4/PLAC8/DAB2IP/DROSH…	77	27	ENSSSCG00000035355/ENSSSCG00000031262/ENSSSCG00000030957/ENSSSCG00000007954/ENSSSCG00000015782/ENSSSCG00000005305/ENSSSCG00000027709/ENSSSCG00000016140/ENSSSCG00000014119/ENSSSCG00000002749/ENSSSCG00000017268/ENSSSCG00000024592/ENSSSCG00000035859/ENSSSCG00000001975/ENSSSCG00000038073/ENSSSCG00000001880/ENSSSCG00000003591/ENSSSCG00000012325/ENSSSCG00000012076/ENSSSCG00000016716/ENSSSCG00000033175/…	50	ENSSSCG00000001952/ENSSSCG00000006084/ENSSSCG00000012252/ENSSSCG00000014277/ENSSSCG00000017705/ENSSSCG00000031888/ENSSSCG00000015801/ENSSSCG00000011510/ENSSSCG00000040751/ENSSSCG00000016929/ENSSSCG00000036381/ENSSSCG00000016954/ENSSSCG00000024916/ENSSSCG00000024596/ENSSSCG00000006983/ENSSSCG00000027074/ENSSSCG00000029385/ENSSSCG00000039548/ENSSSCG00000017466/ENSSSCG00000031498/ENSSSCG00000004154/…
BP	GO:0070646	protein modification by small protein removal	24/1419	106/10877	0.00438768863080012	0.327810931253008	ENSSSCG00000027594/ENSSSCG00000006663/ENSSSCG00000003820/ENSSSCG00000023174/ENSSSCG00000011765/ENSSSCG00000010802/ENSSSCG00000004652/ENSSSCG00000020702/ENSSSCG00000004154/ENSSSCG00000004639/ENSSSCG00000000457/ENSSSCG00000007248/ENSSSCG00000013402/ENSSSCG00000009946/ENSSSCG00000010737/ENSSSCG00000012305/ENSSSCG00000008382/ENSSSCG00000002446/ENSSSCG00000007606/ENSSSCG00000015659/ENSSSCG00000024623/…	USP16/OTUD7B/USP1/USP53/USP13/UCHL5/COPS2/SENP6/TNFAIP3/USP8/USP15/ASXL1/USP47/SART3/ABRAXAS2/USP27X/USP34/-/TRRAP/YOD1/USP25/NOP53/JOSD2/USPL1	24	7	ENSSSCG00000006663/ENSSSCG00000011765/ENSSSCG00000007248/ENSSSCG00000009946/ENSSSCG00000010737/ENSSSCG00000012305/ENSSSCG00000007606	17	ENSSSCG00000027594/ENSSSCG00000003820/ENSSSCG00000023174/ENSSSCG00000010802/ENSSSCG00000004652/ENSSSCG00000020702/ENSSSCG00000004154/ENSSSCG00000004639/ENSSSCG00000000457/ENSSSCG00000013402/ENSSSCG00000008382/ENSSSCG00000002446/ENSSSCG00000015659/ENSSSCG00000024623/ENSSSCG00000022774/ENSSSCG00000003217/ENSSSCG00000028065
BP	GO:0044772	mitotic cell cycle phase transition	45/1419	234/10877	0.00443206616783237	0.327810931253008	ENSSSCG00000012252/ENSSSCG00000016291/ENSSSCG00000016346/ENSSSCG00000003928/ENSSSCG00000006127/ENSSSCG00000027251/ENSSSCG00000016925/ENSSSCG00000012307/ENSSSCG00000021966/ENSSSCG00000015874/ENSSSCG00000005267/ENSSSCG00000009434/ENSSSCG00000035639/ENSSSCG00000009217/ENSSSCG00000015600/ENSSSCG00000017308/ENSSSCG00000026959/ENSSSCG00000001565/ENSSSCG00000007056/ENSSSCG00000010912/ENSSSCG00000004893/…	DDX3X/GIGYF2/MAD2L1BP/PLK3/NBN/CDC7/PLK2/CCNB3/TOPBP1/ACVR1/ANXA1/RGCC/NAE1/PKD2/DTL/CDC27/NPAT/CDKN1A/PLCB1/KIF14/VPS4B/CHEK1/CUL4B/ATAD5/CLASP1/ANKRD17/CENPE/USP47/TPR/CDC14B/PRKDC/EIF4E/EGFR/SIN3A/ACVR1B/CENPF/RPL26/ATM/NOP53/TICRR/-/HECW2/GPR132/CCNE2/BRD4	45	19	ENSSSCG00000016291/ENSSSCG00000016346/ENSSSCG00000027251/ENSSSCG00000016925/ENSSSCG00000012307/ENSSSCG00000015874/ENSSSCG00000009217/ENSSSCG00000015600/ENSSSCG00000010912/ENSSSCG00000039157/ENSSSCG00000024592/ENSSSCG00000027557/ENSSSCG00000006274/ENSSSCG00000022126/ENSSSCG00000001880/ENSSSCG00000000233/ENSSSCG00000040355/ENSSSCG00000016068/ENSSSCG00000022227	26	ENSSSCG00000012252/ENSSSCG00000003928/ENSSSCG00000006127/ENSSSCG00000021966/ENSSSCG00000005267/ENSSSCG00000009434/ENSSSCG00000035639/ENSSSCG00000017308/ENSSSCG00000026959/ENSSSCG00000001565/ENSSSCG00000007056/ENSSSCG00000004893/ENSSSCG00000015215/ENSSSCG00000029478/ENSSSCG00000035954/ENSSSCG00000023296/ENSSSCG00000013402/ENSSSCG00000015576/ENSSSCG00000028420/ENSSSCG00000015581/ENSSSCG00000028850/…
BP	GO:0060271	cilium assembly	40/1419	203/10877	0.00457892692225653	0.327810931253008	ENSSSCG00000006994/ENSSSCG00000011733/ENSSSCG00000009818/ENSSSCG00000008406/ENSSSCG00000004601/ENSSSCG00000010984/ENSSSCG00000003107/ENSSSCG00000036434/ENSSSCG00000014283/ENSSSCG00000024722/ENSSSCG00000006108/ENSSSCG00000021138/ENSSSCG00000015931/ENSSSCG00000038383/ENSSSCG00000027997/ENSSSCG00000010651/ENSSSCG00000004166/ENSSSCG00000004289/ENSSSCG00000027557/ENSSSCG00000000926/ENSSSCG00000029943/…	PCM1/-/IFT81/CCDC88A/MNS1/KIF24/ARHGAP35/TPGS1/KIF3A/PIBF1/TMEM67/CEP250/BBS5/DYNC2LI1/NME5/ABLIM1/AHI1/CEP162/CDC14B/CEP290/SCLT1/B9D2/CEP83/IFT74/CEP135/CEP89/NEURL1/CCDC39/CEP126/UBE2B/PIH1D3/ASAP1/-/INTU/CCP110/GORAB/CEP120/IQUB/JHY/TBC1D32	40	9	ENSSSCG00000010984/ENSSSCG00000003107/ENSSSCG00000021138/ENSSSCG00000010651/ENSSSCG00000027557/ENSSSCG00000025152/ENSSSCG00000010603/ENSSSCG00000028759/ENSSSCG00000015138	31	ENSSSCG00000006994/ENSSSCG00000011733/ENSSSCG00000009818/ENSSSCG00000008406/ENSSSCG00000004601/ENSSSCG00000036434/ENSSSCG00000014283/ENSSSCG00000024722/ENSSSCG00000006108/ENSSSCG00000015931/ENSSSCG00000038383/ENSSSCG00000027997/ENSSSCG00000004166/ENSSSCG00000004289/ENSSSCG00000000926/ENSSSCG00000029943/ENSSSCG00000003013/ENSSSCG00000024563/ENSSSCG00000005124/ENSSSCG00000022283/ENSSSCG00000011768/…
BP	GO:1901990	regulation of mitotic cell cycle phase transition	34/1419	166/10877	0.00459461121055326	0.327810931253008	ENSSSCG00000012252/ENSSSCG00000016291/ENSSSCG00000016346/ENSSSCG00000006127/ENSSSCG00000027251/ENSSSCG00000012307/ENSSSCG00000021966/ENSSSCG00000005267/ENSSSCG00000009434/ENSSSCG00000035639/ENSSSCG00000009217/ENSSSCG00000015600/ENSSSCG00000001565/ENSSSCG00000007056/ENSSSCG00000010912/ENSSSCG00000004893/ENSSSCG00000029478/ENSSSCG00000035954/ENSSSCG00000024592/ENSSSCG00000023296/ENSSSCG00000013402/…	DDX3X/GIGYF2/MAD2L1BP/NBN/CDC7/CCNB3/TOPBP1/ANXA1/RGCC/NAE1/PKD2/DTL/CDKN1A/PLCB1/KIF14/VPS4B/CUL4B/ATAD5/ANKRD17/CENPE/USP47/TPR/CDC14B/PRKDC/EGFR/SIN3A/CENPF/RPL26/ATM/NOP53/TICRR/HECW2/GPR132/BRD4	34	15	ENSSSCG00000016291/ENSSSCG00000016346/ENSSSCG00000027251/ENSSSCG00000012307/ENSSSCG00000009217/ENSSSCG00000015600/ENSSSCG00000010912/ENSSSCG00000024592/ENSSSCG00000027557/ENSSSCG00000006274/ENSSSCG00000022126/ENSSSCG00000001880/ENSSSCG00000040355/ENSSSCG00000016068/ENSSSCG00000022227	19	ENSSSCG00000012252/ENSSSCG00000006127/ENSSSCG00000021966/ENSSSCG00000005267/ENSSSCG00000009434/ENSSSCG00000035639/ENSSSCG00000001565/ENSSSCG00000007056/ENSSSCG00000004893/ENSSSCG00000029478/ENSSSCG00000035954/ENSSSCG00000023296/ENSSSCG00000013402/ENSSSCG00000015576/ENSSSCG00000015581/ENSSSCG00000028850/ENSSSCG00000025606/ENSSSCG00000022774/ENSSSCG00000036892
BP	GO:0048524	positive regulation of viral process	17/1419	67/10877	0.00462287372826188	0.327810931253008	ENSSSCG00000012252/ENSSSCG00000010625/ENSSSCG00000006983/ENSSSCG00000017473/ENSSSCG00000004893/ENSSSCG00000000272/ENSSSCG00000038443/ENSSSCG00000012727/ENSSSCG00000024592/ENSSSCG00000014211/ENSSSCG00000014177/ENSSSCG00000036568/ENSSSCG00000003591/ENSSSCG00000033854/ENSSSCG00000000068/ENSSSCG00000017069/ENSSSCG00000003088	DDX3X/SMC3/CNOT7/TOP2A/VPS4B/SP1/ZNF639/FMR1/ANKRD17/YTHDC2/CHD1/MVB12A/PUM1/LGALS1/EP300/LARP1/APOE	17	5	ENSSSCG00000000272/ENSSSCG00000024592/ENSSSCG00000003591/ENSSSCG00000000068/ENSSSCG00000017069	12	ENSSSCG00000012252/ENSSSCG00000010625/ENSSSCG00000006983/ENSSSCG00000017473/ENSSSCG00000004893/ENSSSCG00000038443/ENSSSCG00000012727/ENSSSCG00000014211/ENSSSCG00000014177/ENSSSCG00000036568/ENSSSCG00000033854/ENSSSCG00000003088
BP	GO:0090090	negative regulation of canonical Wnt signaling pathway	17/1419	67/10877	0.00462287372826188	0.327810931253008	ENSSSCG00000040751/ENSSSCG00000036381/ENSSSCG00000013174/ENSSSCG00000034491/ENSSSCG00000004387/ENSSSCG00000030820/ENSSSCG00000014336/ENSSSCG00000035859/ENSSSCG00000015507/ENSSSCG00000009007/ENSSSCG00000011313/ENSSSCG00000009971/ENSSSCG00000005524/ENSSSCG00000004032/ENSSSCG00000003088/ENSSSCG00000010638/ENSSSCG00000006051	DDIT3/RBMS3/CTNND1/PRICKLE1/FOXO3/STK4/EGR1/WNT5A/TNN/TMEM131L/LIMD1/ZNRF3/DAB2IP/PRKN/APOE/TCF7L2/CTHRC1	17	13	ENSSSCG00000013174/ENSSSCG00000034491/ENSSSCG00000004387/ENSSSCG00000030820/ENSSSCG00000014336/ENSSSCG00000035859/ENSSSCG00000015507/ENSSSCG00000009007/ENSSSCG00000011313/ENSSSCG00000009971/ENSSSCG00000005524/ENSSSCG00000004032/ENSSSCG00000010638	4	ENSSSCG00000040751/ENSSSCG00000036381/ENSSSCG00000003088/ENSSSCG00000006051
BP	GO:1905515	non-motile cilium assembly	12/1419	41/10877	0.0048184352051557	0.327810931253008	ENSSSCG00000006994/ENSSSCG00000011733/ENSSSCG00000014283/ENSSSCG00000024722/ENSSSCG00000021138/ENSSSCG00000005124/ENSSSCG00000022283/ENSSSCG00000025152/ENSSSCG00000014979/ENSSSCG00000009079/ENSSSCG00000006280/ENSSSCG00000004242	PCM1/-/KIF3A/PIBF1/CEP250/IFT74/CEP135/CEP89/CEP126/INTU/GORAB/TBC1D32	12	2	ENSSSCG00000021138/ENSSSCG00000025152	10	ENSSSCG00000006994/ENSSSCG00000011733/ENSSSCG00000014283/ENSSSCG00000024722/ENSSSCG00000005124/ENSSSCG00000022283/ENSSSCG00000014979/ENSSSCG00000009079/ENSSSCG00000006280/ENSSSCG00000004242
BP	GO:0002279	mast cell activation involved in immune response	8/1419	22/10877	0.00483474600772205	0.327810931253008	ENSSSCG00000005385/ENSSSCG00000036828/ENSSSCG00000038735/ENSSSCG00000027074/ENSSSCG00000029615/ENSSSCG00000037719/ENSSSCG00000022820/ENSSSCG00000000634	NR4A3/SNX4/SNAP23/FER/VAMP7/PDPK1/VAMP8/STYK1	8	2	ENSSSCG00000037719/ENSSSCG00000000634	6	ENSSSCG00000005385/ENSSSCG00000036828/ENSSSCG00000038735/ENSSSCG00000027074/ENSSSCG00000029615/ENSSSCG00000022820
BP	GO:0043303	mast cell degranulation	8/1419	22/10877	0.00483474600772205	0.327810931253008	ENSSSCG00000005385/ENSSSCG00000036828/ENSSSCG00000038735/ENSSSCG00000027074/ENSSSCG00000029615/ENSSSCG00000037719/ENSSSCG00000022820/ENSSSCG00000000634	NR4A3/SNX4/SNAP23/FER/VAMP7/PDPK1/VAMP8/STYK1	8	2	ENSSSCG00000037719/ENSSSCG00000000634	6	ENSSSCG00000005385/ENSSSCG00000036828/ENSSSCG00000038735/ENSSSCG00000027074/ENSSSCG00000029615/ENSSSCG00000022820
BP	GO:1902749	regulation of cell cycle G2/M phase transition	16/1419	62/10877	0.00494989059549488	0.327810931253008	ENSSSCG00000006127/ENSSSCG00000027251/ENSSSCG00000012307/ENSSSCG00000021966/ENSSSCG00000035639/ENSSSCG00000015600/ENSSSCG00000010912/ENSSSCG00000004893/ENSSSCG00000013402/ENSSSCG00000001880/ENSSSCG00000015581/ENSSSCG00000025606/ENSSSCG00000022774/ENSSSCG00000040355/ENSSSCG00000036892/ENSSSCG00000022227	NBN/CDC7/CCNB3/TOPBP1/NAE1/DTL/KIF14/VPS4B/USP47/SIN3A/CENPF/ATM/NOP53/TICRR/GPR132/BRD4	16	7	ENSSSCG00000027251/ENSSSCG00000012307/ENSSSCG00000015600/ENSSSCG00000010912/ENSSSCG00000001880/ENSSSCG00000040355/ENSSSCG00000022227	9	ENSSSCG00000006127/ENSSSCG00000021966/ENSSSCG00000035639/ENSSSCG00000004893/ENSSSCG00000013402/ENSSSCG00000015581/ENSSSCG00000025606/ENSSSCG00000022774/ENSSSCG00000036892
BP	GO:0009791	post-embryonic development	18/1419	73/10877	0.00502209027598623	0.327810931253008	ENSSSCG00000011264/ENSSSCG00000016291/ENSSSCG00000003776/ENSSSCG00000005382/ENSSSCG00000027646/ENSSSCG00000007520/ENSSSCG00000005575/ENSSSCG00000010928/ENSSSCG00000005437/ENSSSCG00000012055/ENSSSCG00000012434/ENSSSCG00000016140/ENSSSCG00000023784/ENSSSCG00000023324/ENSSSCG00000020671/ENSSSCG00000011859/ENSSSCG00000007738/ENSSSCG00000025606	CSRNP1/GIGYF2/ACADM/TGFBR1/TIPARP/GNAS/RC3H2/KDM5B/KLF4/MORC3/ATRX/FZD5/SEMA3C/KMT2A/SLC18A2/HEG1/-/ATM	18	6	ENSSSCG00000016291/ENSSSCG00000007520/ENSSSCG00000010928/ENSSSCG00000016140/ENSSSCG00000023324/ENSSSCG00000011859	12	ENSSSCG00000011264/ENSSSCG00000003776/ENSSSCG00000005382/ENSSSCG00000027646/ENSSSCG00000005575/ENSSSCG00000005437/ENSSSCG00000012055/ENSSSCG00000012434/ENSSSCG00000023784/ENSSSCG00000020671/ENSSSCG00000007738/ENSSSCG00000025606
BP	GO:0060070	canonical Wnt signaling pathway	34/1419	167/10877	0.00506589663805281	0.327810931253008	ENSSSCG00000012252/ENSSSCG00000037653/ENSSSCG00000040751/ENSSSCG00000012361/ENSSSCG00000010563/ENSSSCG00000036381/ENSSSCG00000030957/ENSSSCG00000025028/ENSSSCG00000005437/ENSSSCG00000013174/ENSSSCG00000016140/ENSSSCG00000034491/ENSSSCG00000004387/ENSSSCG00000030820/ENSSSCG00000011760/ENSSSCG00000014336/ENSSSCG00000035859/ENSSSCG00000014920/ENSSSCG00000009474/ENSSSCG00000015507/ENSSSCG00000009007/…	DDX3X/RAB5A/DDIT3/AMER1/BTRC/RBMS3/NFKB1/-/KLF4/CTNND1/FZD5/PRICKLE1/FOXO3/STK4/TBL1XR1/EGR1/WNT5A/FZD4/SCEL/TNN/TMEM131L/USP34/RBPJ/LIMD1/ZNRF3/FAM53B/DAB2IP/NRARP/RNF146/UBE2B/PRKN/APOE/TCF7L2/CTHRC1	34	19	ENSSSCG00000012361/ENSSSCG00000010563/ENSSSCG00000030957/ENSSSCG00000013174/ENSSSCG00000016140/ENSSSCG00000034491/ENSSSCG00000004387/ENSSSCG00000030820/ENSSSCG00000014336/ENSSSCG00000035859/ENSSSCG00000014920/ENSSSCG00000015507/ENSSSCG00000009007/ENSSSCG00000011313/ENSSSCG00000009971/ENSSSCG00000010732/ENSSSCG00000005524/ENSSSCG00000004032/ENSSSCG00000010638	15	ENSSSCG00000012252/ENSSSCG00000037653/ENSSSCG00000040751/ENSSSCG00000036381/ENSSSCG00000025028/ENSSSCG00000005437/ENSSSCG00000011760/ENSSSCG00000009474/ENSSSCG00000008382/ENSSSCG00000022155/ENSSSCG00000005844/ENSSSCG00000004217/ENSSSCG00000038953/ENSSSCG00000003088/ENSSSCG00000006051
BP	GO:0016458	gene silencing	25/1419	113/10877	0.00507534806232877	0.327810931253008	ENSSSCG00000009047/ENSSSCG00000016291/ENSSSCG00000011769/ENSSSCG00000006983/ENSSSCG00000008080/ENSSSCG00000031159/ENSSSCG00000028225/ENSSSCG00000015952/ENSSSCG00000034373/ENSSSCG00000012727/ENSSSCG00000030423/ENSSSCG00000004432/ENSSSCG00000000078/ENSSSCG00000016395/ENSSSCG00000036080/ENSSSCG00000008591/ENSSSCG00000022126/ENSSSCG00000001880/ENSSSCG00000003591/ENSSSCG00000011313/ENSSSCG00000010235/…	SMARCA5/GIGYF2/FXR1/CNOT7/PHF2/BEND3/DICER1/HAT1/TNRC6C/FMR1/MIER1/HDAC2/TNRC6B/RIF1/-/ATAD2B/EGFR/SIN3A/PUM1/LIMD1/SIRT1/ARID1A/DROSHA/UBE2B/NCOR1	25	13	ENSSSCG00000016291/ENSSSCG00000008080/ENSSSCG00000031159/ENSSSCG00000028225/ENSSSCG00000034373/ENSSSCG00000000078/ENSSSCG00000022126/ENSSSCG00000001880/ENSSSCG00000003591/ENSSSCG00000011313/ENSSSCG00000003559/ENSSSCG00000016809/ENSSSCG00000018039	12	ENSSSCG00000009047/ENSSSCG00000011769/ENSSSCG00000006983/ENSSSCG00000015952/ENSSSCG00000012727/ENSSSCG00000030423/ENSSSCG00000004432/ENSSSCG00000016395/ENSSSCG00000036080/ENSSSCG00000008591/ENSSSCG00000010235/ENSSSCG00000038953
BP	GO:0040029	regulation of gene expression, epigenetic	30/1419	143/10877	0.00522919249890974	0.327810931253008	ENSSSCG00000009047/ENSSSCG00000016291/ENSSSCG00000024253/ENSSSCG00000011769/ENSSSCG00000008080/ENSSSCG00000029030/ENSSSCG00000031159/ENSSSCG00000028225/ENSSSCG00000015952/ENSSSCG00000034373/ENSSSCG00000015215/ENSSSCG00000012727/ENSSSCG00000030423/ENSSSCG00000004432/ENSSSCG00000000078/ENSSSCG00000005073/ENSSSCG00000016395/ENSSSCG00000036080/ENSSSCG00000008591/ENSSSCG00000022126/ENSSSCG00000001880/…	SMARCA5/GIGYF2/CTCF/FXR1/PHF2/SMCHD1/BEND3/DICER1/HAT1/TNRC6C/CHEK1/FMR1/MIER1/HDAC2/TNRC6B/ARID4A/RIF1/-/ATAD2B/EGFR/SIN3A/PUM1/LIMD1/SIRT1/EP300/ARID1A/DROSHA/UBE2B/HDAC4/NCOR1	30	16	ENSSSCG00000016291/ENSSSCG00000024253/ENSSSCG00000008080/ENSSSCG00000031159/ENSSSCG00000028225/ENSSSCG00000034373/ENSSSCG00000000078/ENSSSCG00000022126/ENSSSCG00000001880/ENSSSCG00000003591/ENSSSCG00000011313/ENSSSCG00000000068/ENSSSCG00000003559/ENSSSCG00000016809/ENSSSCG00000024777/ENSSSCG00000018039	14	ENSSSCG00000009047/ENSSSCG00000011769/ENSSSCG00000029030/ENSSSCG00000015952/ENSSSCG00000015215/ENSSSCG00000012727/ENSSSCG00000030423/ENSSSCG00000004432/ENSSSCG00000005073/ENSSSCG00000016395/ENSSSCG00000036080/ENSSSCG00000008591/ENSSSCG00000010235/ENSSSCG00000038953
BP	GO:0030216	keratinocyte differentiation	15/1419	57/10877	0.00526555603885614	0.327810931253008	ENSSSCG00000031262/ENSSSCG00000034012/ENSSSCG00000038994/ENSSSCG00000005267/ENSSSCG00000021893/ENSSSCG00000039756/ENSSSCG00000030820/ENSSSCG00000035859/ENSSSCG00000009474/ENSSSCG00000007458/ENSSSCG00000022155/ENSSSCG00000008311/ENSSSCG00000005124/ENSSSCG00000009079/ENSSSCG00000024587	TXNIP/CASP3/CLIC4/ANXA1/ROCK1/FOXC1/STK4/WNT5A/SCEL/NCOA3/RBPJ/CYP26B1/IFT74/INTU/DNASE1L2	15	7	ENSSSCG00000031262/ENSSSCG00000039756/ENSSSCG00000030820/ENSSSCG00000035859/ENSSSCG00000007458/ENSSSCG00000008311/ENSSSCG00000024587	8	ENSSSCG00000034012/ENSSSCG00000038994/ENSSSCG00000005267/ENSSSCG00000021893/ENSSSCG00000009474/ENSSSCG00000022155/ENSSSCG00000005124/ENSSSCG00000009079
BP	GO:1901987	regulation of cell cycle phase transition	37/1419	186/10877	0.00531109402695564	0.327810931253008	ENSSSCG00000007351/ENSSSCG00000012252/ENSSSCG00000016291/ENSSSCG00000016346/ENSSSCG00000006127/ENSSSCG00000027251/ENSSSCG00000012307/ENSSSCG00000004466/ENSSSCG00000021966/ENSSSCG00000005267/ENSSSCG00000009434/ENSSSCG00000035639/ENSSSCG00000009217/ENSSSCG00000015600/ENSSSCG00000001565/ENSSSCG00000007056/ENSSSCG00000010912/ENSSSCG00000004893/ENSSSCG00000029478/ENSSSCG00000035954/ENSSSCG00000024592/…	FAM83D/DDX3X/GIGYF2/MAD2L1BP/NBN/CDC7/CCNB3/TTK/TOPBP1/ANXA1/RGCC/NAE1/PKD2/DTL/CDKN1A/PLCB1/KIF14/VPS4B/CUL4B/ATAD5/ANKRD17/CENPE/USP47/ATP2B4/TPR/CDC14B/PRKDC/EGFR/SIN3A/CENPF/RPL26/ATM/NOP53/TICRR/HECW2/GPR132/BRD4	37	17	ENSSSCG00000007351/ENSSSCG00000016291/ENSSSCG00000016346/ENSSSCG00000027251/ENSSSCG00000012307/ENSSSCG00000009217/ENSSSCG00000015600/ENSSSCG00000010912/ENSSSCG00000024592/ENSSSCG00000015273/ENSSSCG00000027557/ENSSSCG00000006274/ENSSSCG00000022126/ENSSSCG00000001880/ENSSSCG00000040355/ENSSSCG00000016068/ENSSSCG00000022227	20	ENSSSCG00000012252/ENSSSCG00000006127/ENSSSCG00000004466/ENSSSCG00000021966/ENSSSCG00000005267/ENSSSCG00000009434/ENSSSCG00000035639/ENSSSCG00000001565/ENSSSCG00000007056/ENSSSCG00000004893/ENSSSCG00000029478/ENSSSCG00000035954/ENSSSCG00000023296/ENSSSCG00000013402/ENSSSCG00000015576/ENSSSCG00000015581/ENSSSCG00000028850/ENSSSCG00000025606/ENSSSCG00000022774/ENSSSCG00000036892
BP	GO:0014808	release of sequestered calcium ion into cytosol by sarcoplasmic reticulum	5/1419	10/10877	0.00535588805242936	0.327810931253008	ENSSSCG00000016929/ENSSSCG00000009125/ENSSSCG00000040125/ENSSSCG00000006231/ENSSSCG00000006390	PDE4D/ANK2/NOL3/CHD7/CASQ1	5	2	ENSSSCG00000009125/ENSSSCG00000006231	3	ENSSSCG00000016929/ENSSSCG00000040125/ENSSSCG00000006390
BP	GO:0036092	phosphatidylinositol-3-phosphate biosynthetic process	5/1419	10/10877	0.00535588805242936	0.327810931253008	ENSSSCG00000003749/ENSSSCG00000030413/ENSSSCG00000025406/ENSSSCG00000008190/ENSSSCG00000025606	PIK3C3/PIK3CA/PIK3C2A/INPP4A/ATM	5	1	ENSSSCG00000008190	4	ENSSSCG00000003749/ENSSSCG00000030413/ENSSSCG00000025406/ENSSSCG00000025606
BP	GO:0090201	negative regulation of release of cytochrome c from mitochondria	5/1419	10/10877	0.00535588805242936	0.327810931253008	ENSSSCG00000006496/ENSSSCG00000011822/ENSSSCG00000040125/ENSSSCG00000004032/ENSSSCG00000007163	LMNA/OPA1/NOL3/PRKN/AVP	5	1	ENSSSCG00000004032	4	ENSSSCG00000006496/ENSSSCG00000011822/ENSSSCG00000040125/ENSSSCG00000007163
BP	GO:1903514	calcium ion transport from endoplasmic reticulum to cytosol	5/1419	10/10877	0.00535588805242936	0.327810931253008	ENSSSCG00000016929/ENSSSCG00000009125/ENSSSCG00000040125/ENSSSCG00000006231/ENSSSCG00000006390	PDE4D/ANK2/NOL3/CHD7/CASQ1	5	2	ENSSSCG00000009125/ENSSSCG00000006231	3	ENSSSCG00000016929/ENSSSCG00000040125/ENSSSCG00000006390
BP	GO:0034655	nucleobase-containing compound catabolic process	35/1419	174/10877	0.005495460267902	0.327810931253008	ENSSSCG00000006752/ENSSSCG00000024411/ENSSSCG00000016911/ENSSSCG00000031882/ENSSSCG00000008452/ENSSSCG00000006033/ENSSSCG00000016929/ENSSSCG00000006078/ENSSSCG00000021586/ENSSSCG00000024596/ENSSSCG00000006983/ENSSSCG00000028225/ENSSSCG00000021354/ENSSSCG00000034373/ENSSSCG00000014187/ENSSSCG00000026568/ENSSSCG00000012727/ENSSSCG00000010240/ENSSSCG00000000078/ENSSSCG00000030388/ENSSSCG00000011117/…	CSDE1/-/SKIV2L2/PNPT1/LRPPRC/EIF3E/PDE4D/POP1/ZHX2/NOCT/CNOT7/DICER1/CNOT4/TNRC6C/NUDT12/DNPH1/FMR1/DNA2/TNRC6B/UPP1/-/ATM/TATDN1/RNASEH2C/NT5C/LSM3/EXOSC4/EXOSC8/-/DROSHA/ADA/PDE4B/DNASE1L2/CIDEA/DIS3L	35	10	ENSSSCG00000024411/ENSSSCG00000006078/ENSSSCG00000021586/ENSSSCG00000028225/ENSSSCG00000021354/ENSSSCG00000034373/ENSSSCG00000000078/ENSSSCG00000016809/ENSSSCG00000024587/ENSSSCG00000004941	25	ENSSSCG00000006752/ENSSSCG00000016911/ENSSSCG00000031882/ENSSSCG00000008452/ENSSSCG00000006033/ENSSSCG00000016929/ENSSSCG00000024596/ENSSSCG00000006983/ENSSSCG00000014187/ENSSSCG00000026568/ENSSSCG00000012727/ENSSSCG00000010240/ENSSSCG00000030388/ENSSSCG00000011117/ENSSSCG00000025606/ENSSSCG00000030603/ENSSSCG00000012979/ENSSSCG00000028210/ENSSSCG00000011601/ENSSSCG00000005925/ENSSSCG00000009358/…
BP	GO:0010596	negative regulation of endothelial cell migration	9/1419	27/10877	0.00552386998244859	0.327810931253008	ENSSSCG00000009348/ENSSSCG00000004755/ENSSSCG00000002254/ENSSSCG00000009434/ENSSSCG00000005437/ENSSSCG00000011739/ENSSSCG00000011496/ENSSSCG00000005524/ENSSSCG00000003088	STARD13/DLL4/NR2F2/RGCC/KLF4/PDCD10/ADAMTS9/DAB2IP/APOE	9	4	ENSSSCG00000009348/ENSSSCG00000002254/ENSSSCG00000011496/ENSSSCG00000005524	5	ENSSSCG00000004755/ENSSSCG00000009434/ENSSSCG00000005437/ENSSSCG00000011739/ENSSSCG00000003088
BP	GO:0043467	regulation of generation of precursor metabolites and energy	14/1419	52/10877	0.00555484518267061	0.327810931253008	ENSSSCG00000005096/ENSSSCG00000031882/ENSSSCG00000031888/ENSSSCG00000021597/ENSSSCG00000025729/ENSSSCG00000025792/ENSSSCG00000030413/ENSSSCG00000022797/ENSSSCG00000000006/ENSSSCG00000030668/ENSSSCG00000022774/ENSSSCG00000024777/ENSSSCG00000018039/ENSSSCG00000002648	HIF1A/PNPT1/DDIT4/PHLDA2/IRS1/NOA1/PIK3CA/PPP1R3B/PPARA/UQCC2/NOP53/HDAC4/NCOR1/CBFA2T3	14	7	ENSSSCG00000025729/ENSSSCG00000025792/ENSSSCG00000022797/ENSSSCG00000000006/ENSSSCG00000024777/ENSSSCG00000018039/ENSSSCG00000002648	7	ENSSSCG00000005096/ENSSSCG00000031882/ENSSSCG00000031888/ENSSSCG00000021597/ENSSSCG00000030413/ENSSSCG00000030668/ENSSSCG00000022774
BP	GO:0045778	positive regulation of ossification	14/1419	52/10877	0.00555484518267061	0.327810931253008	ENSSSCG00000016916/ENSSSCG00000032566/ENSSSCG00000007520/ENSSSCG00000015874/ENSSSCG00000010360/ENSSSCG00000015485/ENSSSCG00000000804/ENSSSCG00000016842/ENSSSCG00000040575/ENSSSCG00000014319/ENSSSCG00000035859/ENSSSCG00000001975/ENSSSCG00000014256/ENSSSCG00000006051	IL6ST/ZHX3/GNAS/ACVR1/BMPR1A/SUCO/ANO6/NIPBL/ISG15/SMAD5/WNT5A/PRKD1/FBN2/CTHRC1	14	7	ENSSSCG00000032566/ENSSSCG00000007520/ENSSSCG00000015874/ENSSSCG00000000804/ENSSSCG00000035859/ENSSSCG00000001975/ENSSSCG00000014256	7	ENSSSCG00000016916/ENSSSCG00000010360/ENSSSCG00000015485/ENSSSCG00000016842/ENSSSCG00000040575/ENSSSCG00000014319/ENSSSCG00000006051
BP	GO:0070231	T cell apoptotic process	10/1419	32/10877	0.00588745279194768	0.328071606978783	ENSSSCG00000006530/ENSSSCG00000003112/ENSSSCG00000005096/ENSSSCG00000017705/ENSSSCG00000005240/ENSSSCG00000002917/ENSSSCG00000035859/ENSSSCG00000008099/ENSSSCG00000037319/ENSSSCG00000021255	EFNA1/-/HIF1A/CCL5/DOCK8/NFKBID/WNT5A/ZC3H8/PDCD1/ADA	10	2	ENSSSCG00000005240/ENSSSCG00000035859	8	ENSSSCG00000006530/ENSSSCG00000003112/ENSSSCG00000005096/ENSSSCG00000017705/ENSSSCG00000002917/ENSSSCG00000008099/ENSSSCG00000037319/ENSSSCG00000021255
BP	GO:0072698	protein localization to microtubule cytoskeleton	10/1419	32/10877	0.00588745279194768	0.328071606978783	ENSSSCG00000007351/ENSSSCG00000006994/ENSSSCG00000004466/ENSSSCG00000012110/ENSSSCG00000010457/ENSSSCG00000017890/ENSSSCG00000024722/ENSSSCG00000021138/ENSSSCG00000011882/ENSSSCG00000001782	FAM83D/PCM1/TTK/MID1/KIF20B/KIAA0753/PIBF1/CEP250/GOLGB1/ABHD17C	10	5	ENSSSCG00000007351/ENSSSCG00000012110/ENSSSCG00000017890/ENSSSCG00000021138/ENSSSCG00000001782	5	ENSSSCG00000006994/ENSSSCG00000004466/ENSSSCG00000010457/ENSSSCG00000024722/ENSSSCG00000011882
BP	GO:0003229	ventricular cardiac muscle tissue development	11/1419	37/10877	0.0060100134092747	0.328071606978783	ENSSSCG00000005382/ENSSSCG00000004755/ENSSSCG00000010360/ENSSSCG00000039756/ENSSSCG00000025334/ENSSSCG00000040746/ENSSSCG00000022155/ENSSSCG00000011496/ENSSSCG00000011859/ENSSSCG00000006231/ENSSSCG00000011441	TGFBR1/DLL4/BMPR1A/FOXC1/POU4F1/LRP2/RBPJ/ADAMTS9/HEG1/CHD7/TNNC1	11	6	ENSSSCG00000039756/ENSSSCG00000025334/ENSSSCG00000040746/ENSSSCG00000011496/ENSSSCG00000011859/ENSSSCG00000006231	5	ENSSSCG00000005382/ENSSSCG00000004755/ENSSSCG00000010360/ENSSSCG00000022155/ENSSSCG00000011441
BP	GO:0051279	regulation of release of sequestered calcium ion into cytosol	11/1419	37/10877	0.0060100134092747	0.328071606978783	ENSSSCG00000035355/ENSSSCG00000016929/ENSSSCG00000009217/ENSSSCG00000037719/ENSSSCG00000031493/ENSSSCG00000009125/ENSSSCG00000001975/ENSSSCG00000011681/ENSSSCG00000006231/ENSSSCG00000015136/ENSSSCG00000006390	F2R/PDE4D/PKD2/PDPK1/CYBA/ANK2/PRKD1/TRPC1/CHD7/UBASH3B/CASQ1	11	7	ENSSSCG00000035355/ENSSSCG00000009217/ENSSSCG00000037719/ENSSSCG00000009125/ENSSSCG00000001975/ENSSSCG00000006231/ENSSSCG00000015136	4	ENSSSCG00000016929/ENSSSCG00000031493/ENSSSCG00000011681/ENSSSCG00000006390
BP	GO:0070228	regulation of lymphocyte apoptotic process	11/1419	37/10877	0.0060100134092747	0.328071606978783	ENSSSCG00000006530/ENSSSCG00000003112/ENSSSCG00000005096/ENSSSCG00000017705/ENSSSCG00000005240/ENSSSCG00000002917/ENSSSCG00000031954/ENSSSCG00000035859/ENSSSCG00000008099/ENSSSCG00000037319/ENSSSCG00000021255	EFNA1/-/HIF1A/CCL5/DOCK8/NFKBID/SLC39A10/WNT5A/ZC3H8/PDCD1/ADA	11	2	ENSSSCG00000005240/ENSSSCG00000035859	9	ENSSSCG00000006530/ENSSSCG00000003112/ENSSSCG00000005096/ENSSSCG00000017705/ENSSSCG00000002917/ENSSSCG00000031954/ENSSSCG00000008099/ENSSSCG00000037319/ENSSSCG00000021255
BP	GO:1903578	regulation of ATP metabolic process	11/1419	37/10877	0.0060100134092747	0.328071606978783	ENSSSCG00000005096/ENSSSCG00000031888/ENSSSCG00000031159/ENSSSCG00000000006/ENSSSCG00000027072/ENSSSCG00000000033/ENSSSCG00000010235/ENSSSCG00000030668/ENSSSCG00000024777/ENSSSCG00000018039/ENSSSCG00000002648	HIF1A/DDIT4/BEND3/PPARA/ATPIF1/TSPO/SIRT1/UQCC2/HDAC4/NCOR1/CBFA2T3	11	5	ENSSSCG00000031159/ENSSSCG00000000006/ENSSSCG00000024777/ENSSSCG00000018039/ENSSSCG00000002648	6	ENSSSCG00000005096/ENSSSCG00000031888/ENSSSCG00000027072/ENSSSCG00000000033/ENSSSCG00000010235/ENSSSCG00000030668
BP	GO:0051707	response to other organism	71/1419	408/10877	0.00614690825177222	0.331401831302337	ENSSSCG00000001952/ENSSSCG00000006084/ENSSSCG00000012252/ENSSSCG00000035355/ENSSSCG00000014277/ENSSSCG00000017705/ENSSSCG00000031888/ENSSSCG00000015801/ENSSSCG00000011510/ENSSSCG00000016929/ENSSSCG00000016954/ENSSSCG00000030957/ENSSSCG00000024916/ENSSSCG00000024596/ENSSSCG00000006983/ENSSSCG00000015782/ENSSSCG00000027074/ENSSSCG00000005305/ENSSSCG00000029385/ENSSSCG00000027709/ENSSSCG00000039548/…	NFKBIA/MTDH/DDX3X/F2R/IRF1/CCL5/DDIT4/TLR3/TMF1/PDE4D/ERBIN/NFKB1/DHX36/NOCT/CNOT7/IRF2/FER/UNC13B/LIAS/PARP9/PTGFR/CCR7/FZD5/PPP2R3C/TNFAIP3/ELMOD2/SERINC5/ISG15/-/PRKCA/MAP3K14/CXCL8/KRT8/-/FMR1/IFI44L/ANKRD17/CYBA/WNT5A/-/S100A12/CXCL2/PRKD1/RBPJ/CHUK/NOD2/MAPK11/PDCD4/EIF2AK2/SIN3A/PUM1/C19orf66/MX2/RPS15A/GSDME/BAD/LY96/NOP53/SASH1/RPS19/EXOSC4/PLAC8/DAB2IP/DROSHA/PALM3/RNF216/IFIT5/PDE4B/TN…	71	24	ENSSSCG00000035355/ENSSSCG00000030957/ENSSSCG00000015782/ENSSSCG00000005305/ENSSSCG00000027709/ENSSSCG00000016140/ENSSSCG00000014119/ENSSSCG00000002749/ENSSSCG00000017268/ENSSSCG00000024592/ENSSSCG00000035859/ENSSSCG00000001975/ENSSSCG00000038073/ENSSSCG00000001880/ENSSSCG00000003591/ENSSSCG00000012076/ENSSSCG00000016716/ENSSSCG00000033175/ENSSSCG00000005524/ENSSSCG00000016809/ENSSSCG00000013767/…	47	ENSSSCG00000001952/ENSSSCG00000006084/ENSSSCG00000012252/ENSSSCG00000014277/ENSSSCG00000017705/ENSSSCG00000031888/ENSSSCG00000015801/ENSSSCG00000011510/ENSSSCG00000016929/ENSSSCG00000016954/ENSSSCG00000024916/ENSSSCG00000024596/ENSSSCG00000006983/ENSSSCG00000027074/ENSSSCG00000029385/ENSSSCG00000039548/ENSSSCG00000017466/ENSSSCG00000031498/ENSSSCG00000004154/ENSSSCG00000009055/ENSSSCG00000040575/…
BP	GO:0030278	regulation of ossification	25/1419	115/10877	0.00642399917512876	0.333292298512922	ENSSSCG00000010224/ENSSSCG00000005096/ENSSSCG00000016916/ENSSSCG00000032566/ENSSSCG00000002344/ENSSSCG00000007520/ENSSSCG00000015874/ENSSSCG00000024596/ENSSSCG00000010360/ENSSSCG00000015485/ENSSSCG00000000804/ENSSSCG00000016842/ENSSSCG00000004825/ENSSSCG00000040575/ENSSSCG00000014319/ENSSSCG00000035859/ENSSSCG00000037449/ENSSSCG00000015507/ENSSSCG00000001975/ENSSSCG00000022155/ENSSSCG00000011313/…	EGR2/HIF1A/IL6ST/ZHX3/RIOX1/GNAS/ACVR1/NOCT/BMPR1A/SUCO/ANO6/NIPBL/CHSY1/ISG15/SMAD5/WNT5A/CSF1/TNN/PRKD1/RBPJ/LIMD1/FBN2/HDAC4/INTU/CTHRC1	25	13	ENSSSCG00000010224/ENSSSCG00000032566/ENSSSCG00000002344/ENSSSCG00000007520/ENSSSCG00000015874/ENSSSCG00000000804/ENSSSCG00000004825/ENSSSCG00000035859/ENSSSCG00000015507/ENSSSCG00000001975/ENSSSCG00000011313/ENSSSCG00000014256/ENSSSCG00000024777	12	ENSSSCG00000005096/ENSSSCG00000016916/ENSSSCG00000024596/ENSSSCG00000010360/ENSSSCG00000015485/ENSSSCG00000016842/ENSSSCG00000040575/ENSSSCG00000014319/ENSSSCG00000037449/ENSSSCG00000022155/ENSSSCG00000009079/ENSSSCG00000006051
BP	GO:0032103	positive regulation of response to external stimulus	30/1419	145/10877	0.00642958580259912	0.333292298512922	ENSSSCG00000001952/ENSSSCG00000004595/ENSSSCG00000017705/ENSSSCG00000015801/ENSSSCG00000036828/ENSSSCG00000013410/ENSSSCG00000012131/ENSSSCG00000024351/ENSSSCG00000005305/ENSSSCG00000017466/ENSSSCG00000000804/ENSSSCG00000029615/ENSSSCG00000017268/ENSSSCG00000008953/ENSSSCG00000008954/ENSSSCG00000024592/ENSSSCG00000031493/ENSSSCG00000035859/ENSSSCG00000037449/ENSSSCG00000008959/ENSSSCG00000038073/…	NFKBIA/ADAM10/CCL5/TLR3/SNX4/SWAP70/MOSPD2/MET/UNC13B/CCR7/ANO6/VAMP7/PRKCA/CXCL8/-/ANKRD17/CYBA/WNT5A/CSF1/CXCL2/NOD2/PDCD4/PUM1/LY96/SASH1/RPS19/VAMP8/TNFRSF11A/ZP3/CD180	30	11	ENSSSCG00000013410/ENSSSCG00000005305/ENSSSCG00000000804/ENSSSCG00000017268/ENSSSCG00000024592/ENSSSCG00000035859/ENSSSCG00000038073/ENSSSCG00000003591/ENSSSCG00000033175/ENSSSCG00000004898/ENSSSCG00000016957	19	ENSSSCG00000001952/ENSSSCG00000004595/ENSSSCG00000017705/ENSSSCG00000015801/ENSSSCG00000036828/ENSSSCG00000012131/ENSSSCG00000024351/ENSSSCG00000017466/ENSSSCG00000029615/ENSSSCG00000008953/ENSSSCG00000008954/ENSSSCG00000031493/ENSSSCG00000037449/ENSSSCG00000008959/ENSSSCG00000010627/ENSSSCG00000006175/ENSSSCG00000003042/ENSSSCG00000022820/ENSSSCG00000007691
BP	GO:1903046	meiotic cell cycle process	29/1419	139/10877	0.00646999953068471	0.333292298512922	ENSSSCG00000011213/ENSSSCG00000005403/ENSSSCG00000023303/ENSSSCG00000011731/ENSSSCG00000000693/ENSSSCG00000004466/ENSSSCG00000007954/ENSSSCG00000012434/ENSSSCG00000016092/ENSSSCG00000017473/ENSSSCG00000010357/ENSSSCG00000029168/ENSSSCG00000007056/ENSSSCG00000010779/ENSSSCG00000003576/ENSSSCG00000035859/ENSSSCG00000011363/ENSSSCG00000008311/ENSSSCG00000025606/ENSSSCG00000008921/ENSSSCG00000010214/…	TOP2B/SMC2/FIGNL1/SMC4/NCAPD2/TTK/SLX4/ATRX/SGO2/TOP2A/WAPL/MARF1/PLCB1/SYCE1/GPR3/WNT5A/PRKAR2A/CYP26B1/ATM/CENPC/-/ERCC4/CCNB1IP1/UBE2B/MND1/FANCM/CCNE2/KIF18A/HFM1	29	8	ENSSSCG00000023303/ENSSSCG00000000693/ENSSSCG00000007954/ENSSSCG00000029168/ENSSSCG00000035859/ENSSSCG00000011363/ENSSSCG00000008311/ENSSSCG00000007881	21	ENSSSCG00000011213/ENSSSCG00000005403/ENSSSCG00000011731/ENSSSCG00000004466/ENSSSCG00000012434/ENSSSCG00000016092/ENSSSCG00000017473/ENSSSCG00000010357/ENSSSCG00000007056/ENSSSCG00000010779/ENSSSCG00000003576/ENSSSCG00000025606/ENSSSCG00000008921/ENSSSCG00000010214/ENSSSCG00000002144/ENSSSCG00000038953/ENSSSCG00000009009/ENSSSCG00000005000/ENSSSCG00000006095/ENSSSCG00000013332/ENSSSCG00000006912
BP	GO:0044770	cell cycle phase transition	48/1419	258/10877	0.00648725563856156	0.333292298512922	ENSSSCG00000007351/ENSSSCG00000012252/ENSSSCG00000016291/ENSSSCG00000016346/ENSSSCG00000003928/ENSSSCG00000006127/ENSSSCG00000027251/ENSSSCG00000016925/ENSSSCG00000012307/ENSSSCG00000004466/ENSSSCG00000021966/ENSSSCG00000015874/ENSSSCG00000005267/ENSSSCG00000009434/ENSSSCG00000035639/ENSSSCG00000009217/ENSSSCG00000015600/ENSSSCG00000017308/ENSSSCG00000026959/ENSSSCG00000001565/ENSSSCG00000007056/…	FAM83D/DDX3X/GIGYF2/MAD2L1BP/PLK3/NBN/CDC7/PLK2/CCNB3/TTK/TOPBP1/ACVR1/ANXA1/RGCC/NAE1/PKD2/DTL/CDC27/NPAT/CDKN1A/PLCB1/KIF14/VPS4B/CHEK1/CUL4B/ATAD5/CLASP1/ANKRD17/CENPE/USP47/ATP2B4/TPR/CDC14B/PRKDC/EIF4E/EGFR/SIN3A/ACVR1B/CENPF/RPL26/ATM/NOP53/TICRR/-/HECW2/GPR132/CCNE2/BRD4	48	21	ENSSSCG00000007351/ENSSSCG00000016291/ENSSSCG00000016346/ENSSSCG00000027251/ENSSSCG00000016925/ENSSSCG00000012307/ENSSSCG00000015874/ENSSSCG00000009217/ENSSSCG00000015600/ENSSSCG00000010912/ENSSSCG00000039157/ENSSSCG00000024592/ENSSSCG00000015273/ENSSSCG00000027557/ENSSSCG00000006274/ENSSSCG00000022126/ENSSSCG00000001880/ENSSSCG00000000233/ENSSSCG00000040355/ENSSSCG00000016068/ENSSSCG00000022227	27	ENSSSCG00000012252/ENSSSCG00000003928/ENSSSCG00000006127/ENSSSCG00000004466/ENSSSCG00000021966/ENSSSCG00000005267/ENSSSCG00000009434/ENSSSCG00000035639/ENSSSCG00000017308/ENSSSCG00000026959/ENSSSCG00000001565/ENSSSCG00000007056/ENSSSCG00000004893/ENSSSCG00000015215/ENSSSCG00000029478/ENSSSCG00000035954/ENSSSCG00000023296/ENSSSCG00000013402/ENSSSCG00000015576/ENSSSCG00000028420/ENSSSCG00000015581/…
BP	GO:0050871	positive regulation of B cell activation	14/1419	53/10877	0.00666356919722145	0.338369845165885	ENSSSCG00000012713/ENSSSCG00000011848/ENSSSCG00000001565/ENSSSCG00000031498/ENSSSCG00000020931/ENSSSCG00000011081/ENSSSCG00000031954/ENSSSCG00000035954/ENSSSCG00000016395/ENSSSCG00000038073/ENSSSCG00000032833/ENSSSCG00000013033/ENSSSCG00000007477/ENSSSCG00000021255	ATP11C/TFRC/CDKN1A/PPP2R3C/MSH6/-/SLC39A10/ATAD5/RIF1/NOD2/CD320/BAD/NFATC2/ADA	14	3	ENSSSCG00000020931/ENSSSCG00000038073/ENSSSCG00000007477	11	ENSSSCG00000012713/ENSSSCG00000011848/ENSSSCG00000001565/ENSSSCG00000031498/ENSSSCG00000011081/ENSSSCG00000031954/ENSSSCG00000035954/ENSSSCG00000016395/ENSSSCG00000032833/ENSSSCG00000013033/ENSSSCG00000021255
BP	GO:0007052	mitotic spindle organization	18/1419	75/10877	0.00677888622779436	0.340268921342275	ENSSSCG00000010625/ENSSSCG00000016925/ENSSSCG00000010471/ENSSSCG00000012642/ENSSSCG00000030443/ENSSSCG00000004893/ENSSSCG00000024663/ENSSSCG00000017514/ENSSSCG00000024722/ENSSSCG00000039157/ENSSSCG00000023296/ENSSSCG00000015576/ENSSSCG00000027557/ENSSSCG00000010737/ENSSSCG00000012325/ENSSSCG00000015924/ENSSSCG00000014979/ENSSSCG00000015407	SMC3/PLK2/KIF11/STAG2/INTS13/VPS4B/SPICE1/KPNB1/PIBF1/CLASP1/CENPE/TPR/CDC14B/ABRAXAS2/SMC1A/SPC25/CEP126/GNAI1	18	7	ENSSSCG00000016925/ENSSSCG00000024663/ENSSSCG00000017514/ENSSSCG00000039157/ENSSSCG00000027557/ENSSSCG00000010737/ENSSSCG00000012325	11	ENSSSCG00000010625/ENSSSCG00000010471/ENSSSCG00000012642/ENSSSCG00000030443/ENSSSCG00000004893/ENSSSCG00000024722/ENSSSCG00000023296/ENSSSCG00000015576/ENSSSCG00000015924/ENSSSCG00000014979/ENSSSCG00000015407
BP	GO:0043207	response to external biotic stimulus	71/1419	410/10877	0.00690830287843018	0.342077742110246	ENSSSCG00000001952/ENSSSCG00000006084/ENSSSCG00000012252/ENSSSCG00000035355/ENSSSCG00000014277/ENSSSCG00000017705/ENSSSCG00000031888/ENSSSCG00000015801/ENSSSCG00000011510/ENSSSCG00000016929/ENSSSCG00000016954/ENSSSCG00000030957/ENSSSCG00000024916/ENSSSCG00000024596/ENSSSCG00000006983/ENSSSCG00000015782/ENSSSCG00000027074/ENSSSCG00000005305/ENSSSCG00000029385/ENSSSCG00000027709/ENSSSCG00000039548/…	NFKBIA/MTDH/DDX3X/F2R/IRF1/CCL5/DDIT4/TLR3/TMF1/PDE4D/ERBIN/NFKB1/DHX36/NOCT/CNOT7/IRF2/FER/UNC13B/LIAS/PARP9/PTGFR/CCR7/FZD5/PPP2R3C/TNFAIP3/ELMOD2/SERINC5/ISG15/-/PRKCA/MAP3K14/CXCL8/KRT8/-/FMR1/IFI44L/ANKRD17/CYBA/WNT5A/-/S100A12/CXCL2/PRKD1/RBPJ/CHUK/NOD2/MAPK11/PDCD4/EIF2AK2/SIN3A/PUM1/C19orf66/MX2/RPS15A/GSDME/BAD/LY96/NOP53/SASH1/RPS19/EXOSC4/PLAC8/DAB2IP/DROSHA/PALM3/RNF216/IFIT5/PDE4B/TN…	71	24	ENSSSCG00000035355/ENSSSCG00000030957/ENSSSCG00000015782/ENSSSCG00000005305/ENSSSCG00000027709/ENSSSCG00000016140/ENSSSCG00000014119/ENSSSCG00000002749/ENSSSCG00000017268/ENSSSCG00000024592/ENSSSCG00000035859/ENSSSCG00000001975/ENSSSCG00000038073/ENSSSCG00000001880/ENSSSCG00000003591/ENSSSCG00000012076/ENSSSCG00000016716/ENSSSCG00000033175/ENSSSCG00000005524/ENSSSCG00000016809/ENSSSCG00000013767/…	47	ENSSSCG00000001952/ENSSSCG00000006084/ENSSSCG00000012252/ENSSSCG00000014277/ENSSSCG00000017705/ENSSSCG00000031888/ENSSSCG00000015801/ENSSSCG00000011510/ENSSSCG00000016929/ENSSSCG00000016954/ENSSSCG00000024916/ENSSSCG00000024596/ENSSSCG00000006983/ENSSSCG00000027074/ENSSSCG00000029385/ENSSSCG00000039548/ENSSSCG00000017466/ENSSSCG00000031498/ENSSSCG00000004154/ENSSSCG00000009055/ENSSSCG00000040575/…
BP	GO:0071479	cellular response to ionizing radiation	13/1419	48/10877	0.00702188669415569	0.342077742110246	ENSSSCG00000003112/ENSSSCG00000023303/ENSSSCG00000015602/ENSSSCG00000035746/ENSSSCG00000001565/ENSSSCG00000016842/ENSSSCG00000011679/ENSSSCG00000014336/ENSSSCG00000006954/ENSSSCG00000010235/ENSSSCG00000028850/ENSSSCG00000024019/ENSSSCG00000025606	-/FIGNL1/INTS7/ECT2/CDKN1A/NIPBL/ATR/EGR1/EEF1D/SIRT1/RPL26/-/ATM	13	3	ENSSSCG00000023303/ENSSSCG00000015602/ENSSSCG00000014336	10	ENSSSCG00000003112/ENSSSCG00000035746/ENSSSCG00000001565/ENSSSCG00000016842/ENSSSCG00000011679/ENSSSCG00000006954/ENSSSCG00000010235/ENSSSCG00000028850/ENSSSCG00000024019/ENSSSCG00000025606
BP	GO:0006412	translation	69/1419	397/10877	0.00704991911837008	0.342077742110246	ENSSSCG00000027594/ENSSSCG00000012252/ENSSSCG00000008452/ENSSSCG00000016907/ENSSSCG00000016291/ENSSSCG00000003155/ENSSSCG00000011769/ENSSSCG00000004169/ENSSSCG00000006033/ENSSSCG00000008180/ENSSSCG00000010949/ENSSSCG00000036381/ENSSSCG00000011162/ENSSSCG00000038410/ENSSSCG00000009043/ENSSSCG00000006983/ENSSSCG00000010030/ENSSSCG00000008990/ENSSSCG00000011803/ENSSSCG00000017066/ENSSSCG00000028516/…	USP16/DDX3X/LRPPRC/DHX29/GIGYF2/PPP1R15A/FXR1/HBS1L/EIF3E/EIF5B/DAPK1/RBMS3/LARP4B/CPEB2/ABCE1/CNOT7/EIF4ENIF1/MRPL1/EIF4A2/GEMIN5/LARP4/CDKAL1/FOXO3/MARS2/TNRC6C/UHMK1/NOA1/FMR1/RPS21/TNRC6B/TPR/EIF4E/-/SECISBP2L/PER1/RPS9/RPS15/EIF2AK2/EGFR/RPLP2/RPS16/-/PUM1/LIMD1/EEF1D/-/RPL35/RPS3A/MRPS12/FDXACB1/-/RPL34/-/RPL26/NEURL1/ATM/UQCC2/-/RPS26/-/RPS19/-/LARP1/-/-/RPL9/MRPS34/TRMT10C/NCOR1	69	17	ENSSSCG00000016291/ENSSSCG00000010949/ENSSSCG00000011162/ENSSSCG00000010030/ENSSSCG00000017066/ENSSSCG00000004387/ENSSSCG00000034494/ENSSSCG00000034373/ENSSSCG00000025792/ENSSSCG00000000078/ENSSSCG00000022126/ENSSSCG00000003591/ENSSSCG00000011313/ENSSSCG00000021871/ENSSSCG00000010603/ENSSSCG00000017069/ENSSSCG00000018039	52	ENSSSCG00000027594/ENSSSCG00000012252/ENSSSCG00000008452/ENSSSCG00000016907/ENSSSCG00000003155/ENSSSCG00000011769/ENSSSCG00000004169/ENSSSCG00000006033/ENSSSCG00000008180/ENSSSCG00000036381/ENSSSCG00000038410/ENSSSCG00000009043/ENSSSCG00000006983/ENSSSCG00000008990/ENSSSCG00000011803/ENSSSCG00000028516/ENSSSCG00000001080/ENSSSCG00000006342/ENSSSCG00000012727/ENSSSCG00000002529/ENSSSCG00000015576/…
BP	GO:0007126	meiotic nuclear division	25/1419	116/10877	0.00720198790899886	0.34561627690767	ENSSSCG00000011213/ENSSSCG00000005403/ENSSSCG00000023303/ENSSSCG00000011731/ENSSSCG00000004466/ENSSSCG00000007954/ENSSSCG00000016092/ENSSSCG00000017473/ENSSSCG00000010357/ENSSSCG00000029168/ENSSSCG00000007056/ENSSSCG00000010779/ENSSSCG00000003576/ENSSSCG00000035859/ENSSSCG00000008311/ENSSSCG00000025606/ENSSSCG00000008921/ENSSSCG00000007881/ENSSSCG00000002144/ENSSSCG00000038953/ENSSSCG00000009009/…	TOP2B/SMC2/FIGNL1/SMC4/TTK/SLX4/SGO2/TOP2A/WAPL/MARF1/PLCB1/SYCE1/GPR3/WNT5A/CYP26B1/ATM/CENPC/ERCC4/CCNB1IP1/UBE2B/MND1/FANCM/CCNE2/KIF18A/HFM1	25	6	ENSSSCG00000023303/ENSSSCG00000007954/ENSSSCG00000029168/ENSSSCG00000035859/ENSSSCG00000008311/ENSSSCG00000007881	19	ENSSSCG00000011213/ENSSSCG00000005403/ENSSSCG00000011731/ENSSSCG00000004466/ENSSSCG00000016092/ENSSSCG00000017473/ENSSSCG00000010357/ENSSSCG00000007056/ENSSSCG00000010779/ENSSSCG00000003576/ENSSSCG00000025606/ENSSSCG00000008921/ENSSSCG00000002144/ENSSSCG00000038953/ENSSSCG00000009009/ENSSSCG00000005000/ENSSSCG00000006095/ENSSSCG00000013332/ENSSSCG00000006912
BP	GO:0016579	protein deubiquitination	21/1419	93/10877	0.00764123542103267	0.362709511778801	ENSSSCG00000027594/ENSSSCG00000006663/ENSSSCG00000003820/ENSSSCG00000023174/ENSSSCG00000011765/ENSSSCG00000010802/ENSSSCG00000004154/ENSSSCG00000004639/ENSSSCG00000000457/ENSSSCG00000007248/ENSSSCG00000013402/ENSSSCG00000009946/ENSSSCG00000010737/ENSSSCG00000012305/ENSSSCG00000008382/ENSSSCG00000002446/ENSSSCG00000007606/ENSSSCG00000015659/ENSSSCG00000024623/ENSSSCG00000022774/ENSSSCG00000003217	USP16/OTUD7B/USP1/USP53/USP13/UCHL5/TNFAIP3/USP8/USP15/ASXL1/USP47/SART3/ABRAXAS2/USP27X/USP34/-/TRRAP/YOD1/USP25/NOP53/JOSD2	21	7	ENSSSCG00000006663/ENSSSCG00000011765/ENSSSCG00000007248/ENSSSCG00000009946/ENSSSCG00000010737/ENSSSCG00000012305/ENSSSCG00000007606	14	ENSSSCG00000027594/ENSSSCG00000003820/ENSSSCG00000023174/ENSSSCG00000010802/ENSSSCG00000004154/ENSSSCG00000004639/ENSSSCG00000000457/ENSSSCG00000013402/ENSSSCG00000008382/ENSSSCG00000002446/ENSSSCG00000015659/ENSSSCG00000024623/ENSSSCG00000022774/ENSSSCG00000003217
BP	GO:0050864	regulation of B cell activation	18/1419	76/10877	0.00782770838010625	0.363655345701319	ENSSSCG00000012713/ENSSSCG00000034012/ENSSSCG00000011848/ENSSSCG00000008346/ENSSSCG00000001565/ENSSSCG00000031498/ENSSSCG00000020931/ENSSSCG00000011081/ENSSSCG00000004154/ENSSSCG00000031954/ENSSSCG00000035954/ENSSSCG00000016395/ENSSSCG00000038073/ENSSSCG00000025606/ENSSSCG00000032833/ENSSSCG00000013033/ENSSSCG00000007477/ENSSSCG00000021255	ATP11C/CASP3/TFRC/APLF/CDKN1A/PPP2R3C/MSH6/-/TNFAIP3/SLC39A10/ATAD5/RIF1/NOD2/ATM/CD320/BAD/NFATC2/ADA	18	3	ENSSSCG00000020931/ENSSSCG00000038073/ENSSSCG00000007477	15	ENSSSCG00000012713/ENSSSCG00000034012/ENSSSCG00000011848/ENSSSCG00000008346/ENSSSCG00000001565/ENSSSCG00000031498/ENSSSCG00000011081/ENSSSCG00000004154/ENSSSCG00000031954/ENSSSCG00000035954/ENSSSCG00000016395/ENSSSCG00000025606/ENSSSCG00000032833/ENSSSCG00000013033/ENSSSCG00000021255
BP	GO:1902850	microtubule cytoskeleton organization involved in mitosis	18/1419	76/10877	0.00782770838010625	0.363655345701319	ENSSSCG00000010625/ENSSSCG00000016925/ENSSSCG00000010471/ENSSSCG00000012642/ENSSSCG00000030443/ENSSSCG00000004893/ENSSSCG00000024663/ENSSSCG00000017514/ENSSSCG00000024722/ENSSSCG00000039157/ENSSSCG00000023296/ENSSSCG00000015576/ENSSSCG00000027557/ENSSSCG00000010737/ENSSSCG00000012325/ENSSSCG00000015924/ENSSSCG00000014979/ENSSSCG00000015407	SMC3/PLK2/KIF11/STAG2/INTS13/VPS4B/SPICE1/KPNB1/PIBF1/CLASP1/CENPE/TPR/CDC14B/ABRAXAS2/SMC1A/SPC25/CEP126/GNAI1	18	7	ENSSSCG00000016925/ENSSSCG00000024663/ENSSSCG00000017514/ENSSSCG00000039157/ENSSSCG00000027557/ENSSSCG00000010737/ENSSSCG00000012325	11	ENSSSCG00000010625/ENSSSCG00000010471/ENSSSCG00000012642/ENSSSCG00000030443/ENSSSCG00000004893/ENSSSCG00000024722/ENSSSCG00000023296/ENSSSCG00000015576/ENSSSCG00000015924/ENSSSCG00000014979/ENSSSCG00000015407
BP	GO:0043632	modification-dependent macromolecule catabolic process	69/1419	399/10877	0.00792018741920112	0.364078510101592	ENSSSCG00000016653/ENSSSCG00000027594/ENSSSCG00000017043/ENSSSCG00000031882/ENSSSCG00000040663/ENSSSCG00000001488/ENSSSCG00000006663/ENSSSCG00000003928/ENSSSCG00000006066/ENSSSCG00000003820/ENSSSCG00000008740/ENSSSCG00000040751/ENSSSCG00000004339/ENSSSCG00000010563/ENSSSCG00000029198/ENSSSCG00000016017/ENSSSCG00000011765/ENSSSCG00000004717/ENSSSCG00000032332/ENSSSCG00000002370/ENSSSCG00000010802/…	DNAJB9/USP16/RNF145/PNPT1/HERPUD1/GCLC/OTUD7B/PLK3/RNF19A/USP1/FBXL5/DDIT3/UFL1/BTRC/CUL5/DNAJC10/USP13/UBR1/SOCS4/AREL1/UCHL5/DTL/UBE2H/MTM1/RNF111/TNFAIP3/PBK/KLHL15/PRICKLE1/KIF14/VPS4B/SMARCC1/USP8/FBXL3/USP15/TOPORS/TBL1XR1/ISG15/CUL4B/TMEM67/PSMC6/UBXN2B/TRIP12/USP47/SPOPL/CBL/USP27X/PSMA3/USP34/HUWE1/-/UBR4/-/SVIP/ZNRF3/YOD1/SIRT1/FBXW11/USP25/KCTD21/NOP53/UBA6/EXOSC8/RNF146/UBE2B/RNF216/P…	69	26	ENSSSCG00000017043/ENSSSCG00000001488/ENSSSCG00000006663/ENSSSCG00000008740/ENSSSCG00000010563/ENSSSCG00000011765/ENSSSCG00000002370/ENSSSCG00000015600/ENSSSCG00000016564/ENSSSCG00000012742/ENSSSCG00000004589/ENSSSCG00000034491/ENSSSCG00000010912/ENSSSCG00000011340/ENSSSCG00000006239/ENSSSCG00000024373/ENSSSCG00000015115/ENSSSCG00000012305/ENSSSCG00000012328/ENSSSCG00000003488/ENSSSCG00000009971/…	43	ENSSSCG00000016653/ENSSSCG00000027594/ENSSSCG00000031882/ENSSSCG00000040663/ENSSSCG00000003928/ENSSSCG00000006066/ENSSSCG00000003820/ENSSSCG00000040751/ENSSSCG00000004339/ENSSSCG00000029198/ENSSSCG00000016017/ENSSSCG00000004717/ENSSSCG00000032332/ENSSSCG00000010802/ENSSSCG00000004154/ENSSSCG00000009671/ENSSSCG00000027652/ENSSSCG00000004893/ENSSSCG00000004639/ENSSSCG00000009472/ENSSSCG00000000457/…
BP	GO:0006109	regulation of carbohydrate metabolic process	19/1419	82/10877	0.00817676990396128	0.370162192686786	ENSSSCG00000005096/ENSSSCG00000008398/ENSSSCG00000031888/ENSSSCG00000003776/ENSSSCG00000030957/ENSSSCG00000021597/ENSSSCG00000025729/ENSSSCG00000035037/ENSSSCG00000006194/ENSSSCG00000022797/ENSSSCG00000000006/ENSSSCG00000012181/ENSSSCG00000010235/ENSSSCG00000013033/ENSSSCG00000009794/ENSSSCG00000004032/ENSSSCG00000024777/ENSSSCG00000018039/ENSSSCG00000002648	HIF1A/PPP4R3B/DDIT4/ACADM/NFKB1/PHLDA2/IRS1/-/NCOA2/PPP1R3B/PPARA/PDK3/SIRT1/BAD/MLXIP/PRKN/HDAC4/NCOR1/CBFA2T3	19	11	ENSSSCG00000030957/ENSSSCG00000025729/ENSSSCG00000006194/ENSSSCG00000022797/ENSSSCG00000000006/ENSSSCG00000012181/ENSSSCG00000009794/ENSSSCG00000004032/ENSSSCG00000024777/ENSSSCG00000018039/ENSSSCG00000002648	8	ENSSSCG00000005096/ENSSSCG00000008398/ENSSSCG00000031888/ENSSSCG00000003776/ENSSSCG00000021597/ENSSSCG00000035037/ENSSSCG00000010235/ENSSSCG00000013033
BP	GO:0030031	cell projection assembly	57/1419	320/10877	0.00822205923760437	0.370162192686786	ENSSSCG00000037653/ENSSSCG00000016019/ENSSSCG00000005235/ENSSSCG00000006994/ENSSSCG00000005382/ENSSSCG00000011733/ENSSSCG00000009818/ENSSSCG00000008406/ENSSSCG00000036723/ENSSSCG00000021893/ENSSSCG00000027074/ENSSSCG00000004601/ENSSSCG00000010984/ENSSSCG00000003107/ENSSSCG00000036434/ENSSSCG00000000804/ENSSSCG00000014283/ENSSSCG00000009943/ENSSSCG00000024722/ENSSSCG00000006108/ENSSSCG00000021138/…	RAB5A/NCKAP1/KANK1/PCM1/TGFBR1/-/IFT81/CCDC88A/EMP1/ROCK1/FER/MNS1/KIF24/ARHGAP35/TPGS1/ANO6/KIF3A/SSH1/PIBF1/TMEM67/CEP250/FMR1/BBS5/DYNC2LI1/NME5/ABLIM1/AHI1/CEP162/CDC14B/CEP290/SCLT1/MYLK/B9D2/TSGA10/CEP83/IFT74/CEP135/RHOQ/CEP89/CDC42EP5/NEURL1/CCDC39/MYO10/RHOD/VCL/CEP126/UBE2B/PIH1D3/ASAP1/-/INTU/CCP110/GORAB/CEP120/IQUB/JHY/TBC1D32	57	15	ENSSSCG00000005235/ENSSSCG00000010984/ENSSSCG00000003107/ENSSSCG00000000804/ENSSSCG00000009943/ENSSSCG00000021138/ENSSSCG00000010651/ENSSSCG00000027557/ENSSSCG00000011867/ENSSSCG00000025152/ENSSSCG00000010603/ENSSSCG00000016794/ENSSSCG00000010313/ENSSSCG00000028759/ENSSSCG00000015138	42	ENSSSCG00000037653/ENSSSCG00000016019/ENSSSCG00000006994/ENSSSCG00000005382/ENSSSCG00000011733/ENSSSCG00000009818/ENSSSCG00000008406/ENSSSCG00000036723/ENSSSCG00000021893/ENSSSCG00000027074/ENSSSCG00000004601/ENSSSCG00000036434/ENSSSCG00000014283/ENSSSCG00000024722/ENSSSCG00000006108/ENSSSCG00000012727/ENSSSCG00000015931/ENSSSCG00000038383/ENSSSCG00000027997/ENSSSCG00000004166/ENSSSCG00000004289/…
BP	GO:0051321	meiotic cell cycle	31/1419	154/10877	0.00852701314756052	0.37199537579386	ENSSSCG00000011213/ENSSSCG00000005403/ENSSSCG00000023303/ENSSSCG00000010625/ENSSSCG00000011731/ENSSSCG00000000693/ENSSSCG00000004466/ENSSSCG00000007954/ENSSSCG00000012434/ENSSSCG00000016092/ENSSSCG00000017473/ENSSSCG00000010357/ENSSSCG00000029168/ENSSSCG00000007056/ENSSSCG00000010779/ENSSSCG00000003576/ENSSSCG00000035859/ENSSSCG00000011363/ENSSSCG00000008311/ENSSSCG00000012325/ENSSSCG00000025606/…	TOP2B/SMC2/FIGNL1/SMC3/SMC4/NCAPD2/TTK/SLX4/ATRX/SGO2/TOP2A/WAPL/MARF1/PLCB1/SYCE1/GPR3/WNT5A/PRKAR2A/CYP26B1/SMC1A/ATM/CENPC/-/ERCC4/CCNB1IP1/UBE2B/MND1/FANCM/CCNE2/KIF18A/HFM1	31	9	ENSSSCG00000023303/ENSSSCG00000000693/ENSSSCG00000007954/ENSSSCG00000029168/ENSSSCG00000035859/ENSSSCG00000011363/ENSSSCG00000008311/ENSSSCG00000012325/ENSSSCG00000007881	22	ENSSSCG00000011213/ENSSSCG00000005403/ENSSSCG00000010625/ENSSSCG00000011731/ENSSSCG00000004466/ENSSSCG00000012434/ENSSSCG00000016092/ENSSSCG00000017473/ENSSSCG00000010357/ENSSSCG00000007056/ENSSSCG00000010779/ENSSSCG00000003576/ENSSSCG00000025606/ENSSSCG00000008921/ENSSSCG00000010214/ENSSSCG00000002144/ENSSSCG00000038953/ENSSSCG00000009009/ENSSSCG00000005000/ENSSSCG00000006095/ENSSSCG00000013332/…
BP	GO:0045724	positive regulation of cilium assembly	6/1419	15/10877	0.00854675057741046	0.37199537579386	ENSSSCG00000008406/ENSSSCG00000004601/ENSSSCG00000003107/ENSSSCG00000022283/ENSSSCG00000023829/ENSSSCG00000014239	CCDC88A/MNS1/ARHGAP35/CEP135/CCP110/CEP120	6	1	ENSSSCG00000003107	5	ENSSSCG00000008406/ENSSSCG00000004601/ENSSSCG00000022283/ENSSSCG00000023829/ENSSSCG00000014239
BP	GO:0007623	circadian rhythm	21/1419	94/10877	0.00866308444188813	0.37199537579386	ENSSSCG00000009592/ENSSSCG00000008540/ENSSSCG00000010563/ENSSSCG00000024596/ENSSSCG00000035037/ENSSSCG00000017473/ENSSSCG00000009472/ENSSSCG00000006194/ENSSSCG00000000006/ENSSSCG00000023324/ENSSSCG00000006274/ENSSSCG00000017983/ENSSSCG00000001880/ENSSSCG00000010235/ENSSSCG00000023307/ENSSSCG00000004835/ENSSSCG00000000068/ENSSSCG00000004896/ENSSSCG00000004898/ENSSSCG00000005701/ENSSSCG00000038164	NFIL3/PPP1CB/BTRC/NOCT/-/TOP2A/FBXL3/NCOA2/PPARA/KMT2A/PRKDC/PER1/SIN3A/SIRT1/FBXW11/MAGEL2/EP300/PHLPP1/TNFRSF11A/ASS1/RAI1	21	12	ENSSSCG00000010563/ENSSSCG00000006194/ENSSSCG00000000006/ENSSSCG00000023324/ENSSSCG00000006274/ENSSSCG00000001880/ENSSSCG00000023307/ENSSSCG00000004835/ENSSSCG00000000068/ENSSSCG00000004896/ENSSSCG00000004898/ENSSSCG00000038164	9	ENSSSCG00000009592/ENSSSCG00000008540/ENSSSCG00000024596/ENSSSCG00000035037/ENSSSCG00000017473/ENSSSCG00000009472/ENSSSCG00000017983/ENSSSCG00000010235/ENSSSCG00000005701
BP	GO:0002448	mast cell mediated immunity	8/1419	24/10877	0.00876100590748997	0.37199537579386	ENSSSCG00000005385/ENSSSCG00000036828/ENSSSCG00000038735/ENSSSCG00000027074/ENSSSCG00000029615/ENSSSCG00000037719/ENSSSCG00000022820/ENSSSCG00000000634	NR4A3/SNX4/SNAP23/FER/VAMP7/PDPK1/VAMP8/STYK1	8	2	ENSSSCG00000037719/ENSSSCG00000000634	6	ENSSSCG00000005385/ENSSSCG00000036828/ENSSSCG00000038735/ENSSSCG00000027074/ENSSSCG00000029615/ENSSSCG00000022820
BP	GO:0000729	DNA double-strand break processing	5/1419	11/10877	0.00877387765211074	0.37199537579386	ENSSSCG00000024419/ENSSSCG00000007954/ENSSSCG00000022190/ENSSSCG00000000754/ENSSSCG00000010240	-/SLX4/UBE2V2/RAD52/DNA2	5	2	ENSSSCG00000007954/ENSSSCG00000000754	3	ENSSSCG00000024419/ENSSSCG00000022190/ENSSSCG00000010240
BP	GO:0071428	rRNA-containing ribonucleoprotein complex export from nucleus	5/1419	11/10877	0.00877387765211074	0.37199537579386	ENSSSCG00000009043/ENSSSCG00000008974/ENSSSCG00000028228/ENSSSCG00000022952/ENSSSCG00000022774	ABCE1/-/XPO1/NMD3/NOP53	5	0		5	ENSSSCG00000009043/ENSSSCG00000008974/ENSSSCG00000028228/ENSSSCG00000022952/ENSSSCG00000022774
BP	GO:0007131	reciprocal meiotic recombination	9/1419	29/10877	0.00927636022099508	0.373460770309465	ENSSSCG00000011213/ENSSSCG00000007954/ENSSSCG00000017473/ENSSSCG00000007881/ENSSSCG00000002144/ENSSSCG00000038953/ENSSSCG00000009009/ENSSSCG00000005000/ENSSSCG00000006912	TOP2B/SLX4/TOP2A/ERCC4/CCNB1IP1/UBE2B/MND1/FANCM/HFM1	9	2	ENSSSCG00000007954/ENSSSCG00000007881	7	ENSSSCG00000011213/ENSSSCG00000017473/ENSSSCG00000002144/ENSSSCG00000038953/ENSSSCG00000009009/ENSSSCG00000005000/ENSSSCG00000006912
BP	GO:0035825	reciprocal DNA recombination	9/1419	29/10877	0.00927636022099508	0.373460770309465	ENSSSCG00000011213/ENSSSCG00000007954/ENSSSCG00000017473/ENSSSCG00000007881/ENSSSCG00000002144/ENSSSCG00000038953/ENSSSCG00000009009/ENSSSCG00000005000/ENSSSCG00000006912	TOP2B/SLX4/TOP2A/ERCC4/CCNB1IP1/UBE2B/MND1/FANCM/HFM1	9	2	ENSSSCG00000007954/ENSSSCG00000007881	7	ENSSSCG00000011213/ENSSSCG00000017473/ENSSSCG00000002144/ENSSSCG00000038953/ENSSSCG00000009009/ENSSSCG00000005000/ENSSSCG00000006912
BP	GO:0031648	protein destabilization	10/1419	34/10877	0.00938443903414849	0.373460770309465	ENSSSCG00000010563/ENSSSCG00000009472/ENSSSCG00000006274/ENSSSCG00000003289/ENSSSCG00000040012/ENSSSCG00000010235/ENSSSCG00000023307/ENSSSCG00000007951/ENSSSCG00000000068/ENSSSCG00000004032	BTRC/FBXL3/PRKDC/ISOC2/TMEM147/SIRT1/FBXW11/CREBBP/EP300/PRKN	10	6	ENSSSCG00000010563/ENSSSCG00000006274/ENSSSCG00000023307/ENSSSCG00000007951/ENSSSCG00000000068/ENSSSCG00000004032	4	ENSSSCG00000009472/ENSSSCG00000003289/ENSSSCG00000040012/ENSSSCG00000010235
BP	GO:0044380	protein localization to cytoskeleton	10/1419	34/10877	0.00938443903414849	0.373460770309465	ENSSSCG00000007351/ENSSSCG00000006994/ENSSSCG00000004466/ENSSSCG00000012110/ENSSSCG00000010457/ENSSSCG00000017890/ENSSSCG00000024722/ENSSSCG00000021138/ENSSSCG00000011882/ENSSSCG00000001782	FAM83D/PCM1/TTK/MID1/KIF20B/KIAA0753/PIBF1/CEP250/GOLGB1/ABHD17C	10	5	ENSSSCG00000007351/ENSSSCG00000012110/ENSSSCG00000017890/ENSSSCG00000021138/ENSSSCG00000001782	5	ENSSSCG00000006994/ENSSSCG00000004466/ENSSSCG00000010457/ENSSSCG00000024722/ENSSSCG00000011882
BP	GO:0055010	ventricular cardiac muscle tissue morphogenesis	10/1419	34/10877	0.00938443903414849	0.373460770309465	ENSSSCG00000005382/ENSSSCG00000004755/ENSSSCG00000010360/ENSSSCG00000039756/ENSSSCG00000025334/ENSSSCG00000040746/ENSSSCG00000022155/ENSSSCG00000011859/ENSSSCG00000006231/ENSSSCG00000011441	TGFBR1/DLL4/BMPR1A/FOXC1/POU4F1/LRP2/RBPJ/HEG1/CHD7/TNNC1	10	5	ENSSSCG00000039756/ENSSSCG00000025334/ENSSSCG00000040746/ENSSSCG00000011859/ENSSSCG00000006231	5	ENSSSCG00000005382/ENSSSCG00000004755/ENSSSCG00000010360/ENSSSCG00000022155/ENSSSCG00000011441
BP	GO:0051209	release of sequestered calcium ion into cytosol	14/1419	55/10877	0.00940707229998653	0.373460770309465	ENSSSCG00000035355/ENSSSCG00000040751/ENSSSCG00000016929/ENSSSCG00000009217/ENSSSCG00000004460/ENSSSCG00000037719/ENSSSCG00000031493/ENSSSCG00000009125/ENSSSCG00000001975/ENSSSCG00000040125/ENSSSCG00000011681/ENSSSCG00000006231/ENSSSCG00000015136/ENSSSCG00000006390	F2R/DDIT3/PDE4D/PKD2/IBTK/PDPK1/CYBA/ANK2/PRKD1/NOL3/TRPC1/CHD7/UBASH3B/CASQ1	14	7	ENSSSCG00000035355/ENSSSCG00000009217/ENSSSCG00000037719/ENSSSCG00000009125/ENSSSCG00000001975/ENSSSCG00000006231/ENSSSCG00000015136	7	ENSSSCG00000040751/ENSSSCG00000016929/ENSSSCG00000004460/ENSSSCG00000031493/ENSSSCG00000040125/ENSSSCG00000011681/ENSSSCG00000006390
BP	GO:0051283	negative regulation of sequestering of calcium ion	14/1419	55/10877	0.00940707229998653	0.373460770309465	ENSSSCG00000035355/ENSSSCG00000040751/ENSSSCG00000016929/ENSSSCG00000009217/ENSSSCG00000004460/ENSSSCG00000037719/ENSSSCG00000031493/ENSSSCG00000009125/ENSSSCG00000001975/ENSSSCG00000040125/ENSSSCG00000011681/ENSSSCG00000006231/ENSSSCG00000015136/ENSSSCG00000006390	F2R/DDIT3/PDE4D/PKD2/IBTK/PDPK1/CYBA/ANK2/PRKD1/NOL3/TRPC1/CHD7/UBASH3B/CASQ1	14	7	ENSSSCG00000035355/ENSSSCG00000009217/ENSSSCG00000037719/ENSSSCG00000009125/ENSSSCG00000001975/ENSSSCG00000006231/ENSSSCG00000015136	7	ENSSSCG00000040751/ENSSSCG00000016929/ENSSSCG00000004460/ENSSSCG00000031493/ENSSSCG00000040125/ENSSSCG00000011681/ENSSSCG00000006390
BP	GO:0031023	microtubule organizing center organization	22/1419	101/10877	0.00992137458801981	0.390330115548491	ENSSSCG00000014934/ENSSSCG00000016925/ENSSSCG00000006994/ENSSSCG00000010471/ENSSSCG00000009077/ENSSSCG00000028821/ENSSSCG00000005173/ENSSSCG00000028228/ENSSSCG00000014283/ENSSSCG00000004893/ENSSSCG00000024663/ENSSSCG00000017890/ENSSSCG00000008138/ENSSSCG00000006108/ENSSSCG00000039157/ENSSSCG00000021138/ENSSSCG00000022283/ENSSSCG00000004582/ENSSSCG00000014943/ENSSSCG00000023829/ENSSSCG00000014239/…	CHORDC1/PLK2/PCM1/KIF11/HSPA4L/SASS6/HAUS6/XPO1/KIF3A/VPS4B/SPICE1/KIAA0753/GCC2/TMEM67/CLASP1/CEP250/CEP135/BNIP2/DEUP1/CCP110/CEP120/JHY	22	6	ENSSSCG00000016925/ENSSSCG00000024663/ENSSSCG00000017890/ENSSSCG00000039157/ENSSSCG00000021138/ENSSSCG00000015138	16	ENSSSCG00000014934/ENSSSCG00000006994/ENSSSCG00000010471/ENSSSCG00000009077/ENSSSCG00000028821/ENSSSCG00000005173/ENSSSCG00000028228/ENSSSCG00000014283/ENSSSCG00000004893/ENSSSCG00000008138/ENSSSCG00000006108/ENSSSCG00000022283/ENSSSCG00000004582/ENSSSCG00000014943/ENSSSCG00000023829/ENSSSCG00000014239
BP	GO:0043043	peptide biosynthetic process	70/1419	410/10877	0.0100889276021626	0.393378096773608	ENSSSCG00000027594/ENSSSCG00000012252/ENSSSCG00000008452/ENSSSCG00000001488/ENSSSCG00000016907/ENSSSCG00000016291/ENSSSCG00000003155/ENSSSCG00000011769/ENSSSCG00000004169/ENSSSCG00000006033/ENSSSCG00000008180/ENSSSCG00000010949/ENSSSCG00000036381/ENSSSCG00000011162/ENSSSCG00000038410/ENSSSCG00000009043/ENSSSCG00000006983/ENSSSCG00000010030/ENSSSCG00000008990/ENSSSCG00000011803/ENSSSCG00000017066/…	USP16/DDX3X/LRPPRC/GCLC/DHX29/GIGYF2/PPP1R15A/FXR1/HBS1L/EIF3E/EIF5B/DAPK1/RBMS3/LARP4B/CPEB2/ABCE1/CNOT7/EIF4ENIF1/MRPL1/EIF4A2/GEMIN5/LARP4/CDKAL1/FOXO3/MARS2/TNRC6C/UHMK1/NOA1/FMR1/RPS21/TNRC6B/TPR/EIF4E/-/SECISBP2L/PER1/RPS9/RPS15/EIF2AK2/EGFR/RPLP2/RPS16/-/PUM1/LIMD1/EEF1D/-/RPL35/RPS3A/MRPS12/FDXACB1/-/RPL34/-/RPL26/NEURL1/ATM/UQCC2/-/RPS26/-/RPS19/-/LARP1/-/-/RPL9/MRPS34/TRMT10C/NCOR1	70	18	ENSSSCG00000001488/ENSSSCG00000016291/ENSSSCG00000010949/ENSSSCG00000011162/ENSSSCG00000010030/ENSSSCG00000017066/ENSSSCG00000004387/ENSSSCG00000034494/ENSSSCG00000034373/ENSSSCG00000025792/ENSSSCG00000000078/ENSSSCG00000022126/ENSSSCG00000003591/ENSSSCG00000011313/ENSSSCG00000021871/ENSSSCG00000010603/ENSSSCG00000017069/ENSSSCG00000018039	52	ENSSSCG00000027594/ENSSSCG00000012252/ENSSSCG00000008452/ENSSSCG00000016907/ENSSSCG00000003155/ENSSSCG00000011769/ENSSSCG00000004169/ENSSSCG00000006033/ENSSSCG00000008180/ENSSSCG00000036381/ENSSSCG00000038410/ENSSSCG00000009043/ENSSSCG00000006983/ENSSSCG00000008990/ENSSSCG00000011803/ENSSSCG00000028516/ENSSSCG00000001080/ENSSSCG00000006342/ENSSSCG00000012727/ENSSSCG00000002529/ENSSSCG00000015576/…
BP	GO:0006954	inflammatory response	49/1419	271/10877	0.0103191710815674	0.396488092167106	ENSSSCG00000001952/ENSSSCG00000010922/ENSSSCG00000005096/ENSSSCG00000035355/ENSSSCG00000017705/ENSSSCG00000015801/ENSSSCG00000036828/ENSSSCG00000016254/ENSSSCG00000003582/ENSSSCG00000015874/ENSSSCG00000030957/ENSSSCG00000005267/ENSSSCG00000022447/ENSSSCG00000038735/ENSSSCG00000011951/ENSSSCG00000029385/ENSSSCG00000017466/ENSSSCG00000000804/ENSSSCG00000004154/ENSSSCG00000029615/ENSSSCG00000009671/…	NFKBIA/ELF3/HIF1A/F2R/CCL5/TLR3/SNX4/CCL20/SMPDL3B/ACVR1/NFKB1/ANXA1/F3/SNAP23/NFKBIZ/LIAS/CCR7/ANO6/TNFAIP3/VAMP7/PBK/TBC1D23/-/PIK3CA/CXCL8/-/PPARA/CYBA/SEMA7A/WNT5A/S100A12/CXCL2/RBPJ/NOD2/RICTOR/PDCD4/CYP26B1/RPS19/VAMP8/DROSHA/ADA/-/ADORA2A/APOE/TNFRSF11A/ZP3/JAK2/BRD4/CD180	49	13	ENSSSCG00000035355/ENSSSCG00000015874/ENSSSCG00000030957/ENSSSCG00000000804/ENSSSCG00000002749/ENSSSCG00000000006/ENSSSCG00000035859/ENSSSCG00000038073/ENSSSCG00000008311/ENSSSCG00000016809/ENSSSCG00000004898/ENSSSCG00000022227/ENSSSCG00000016957	36	ENSSSCG00000001952/ENSSSCG00000010922/ENSSSCG00000005096/ENSSSCG00000017705/ENSSSCG00000015801/ENSSSCG00000036828/ENSSSCG00000016254/ENSSSCG00000003582/ENSSSCG00000005267/ENSSSCG00000022447/ENSSSCG00000038735/ENSSSCG00000011951/ENSSSCG00000029385/ENSSSCG00000017466/ENSSSCG00000004154/ENSSSCG00000029615/ENSSSCG00000009671/ENSSSCG00000030486/ENSSSCG00000030413/ENSSSCG00000008953/ENSSSCG00000008954/…
BP	GO:0033003	regulation of mast cell activation	7/1419	20/10877	0.0104750681210119	0.396488092167106	ENSSSCG00000005385/ENSSSCG00000036828/ENSSSCG00000027074/ENSSSCG00000029615/ENSSSCG00000037719/ENSSSCG00000022820/ENSSSCG00000000634	NR4A3/SNX4/FER/VAMP7/PDPK1/VAMP8/STYK1	7	2	ENSSSCG00000037719/ENSSSCG00000000634	5	ENSSSCG00000005385/ENSSSCG00000036828/ENSSSCG00000027074/ENSSSCG00000029615/ENSSSCG00000022820
BP	GO:0043470	regulation of carbohydrate catabolic process	7/1419	20/10877	0.0104750681210119	0.396488092167106	ENSSSCG00000005096/ENSSSCG00000031888/ENSSSCG00000022797/ENSSSCG00000000006/ENSSSCG00000024777/ENSSSCG00000018039/ENSSSCG00000002648	HIF1A/DDIT4/PPP1R3B/PPARA/HDAC4/NCOR1/CBFA2T3	7	5	ENSSSCG00000022797/ENSSSCG00000000006/ENSSSCG00000024777/ENSSSCG00000018039/ENSSSCG00000002648	2	ENSSSCG00000005096/ENSSSCG00000031888
BP	GO:0042113	B cell activation	29/1419	144/10877	0.0106378129867412	0.396488092167106	ENSSSCG00000006127/ENSSSCG00000012713/ENSSSCG00000034012/ENSSSCG00000013410/ENSSSCG00000011417/ENSSSCG00000011848/ENSSSCG00000023724/ENSSSCG00000008346/ENSSSCG00000001565/ENSSSCG00000031498/ENSSSCG00000020931/ENSSSCG00000011081/ENSSSCG00000004154/ENSSSCG00000031954/ENSSSCG00000035954/ENSSSCG00000006510/ENSSSCG00000006274/ENSSSCG00000016395/ENSSSCG00000022155/ENSSSCG00000038073/ENSSSCG00000033854/…	NBN/ATP11C/CASP3/SWAP70/DCAF1/TFRC/ZBTB1/APLF/CDKN1A/PPP2R3C/MSH6/-/TNFAIP3/SLC39A10/ATAD5/-/PRKDC/RIF1/RBPJ/NOD2/LGALS1/ATM/CD320/BAD/NFATC2/EP300/ADA/CD79A/CD180	29	9	ENSSSCG00000013410/ENSSSCG00000011417/ENSSSCG00000020931/ENSSSCG00000006510/ENSSSCG00000006274/ENSSSCG00000038073/ENSSSCG00000007477/ENSSSCG00000000068/ENSSSCG00000016957	20	ENSSSCG00000006127/ENSSSCG00000012713/ENSSSCG00000034012/ENSSSCG00000011848/ENSSSCG00000023724/ENSSSCG00000008346/ENSSSCG00000001565/ENSSSCG00000031498/ENSSSCG00000011081/ENSSSCG00000004154/ENSSSCG00000031954/ENSSSCG00000035954/ENSSSCG00000016395/ENSSSCG00000022155/ENSSSCG00000033854/ENSSSCG00000025606/ENSSSCG00000032833/ENSSSCG00000013033/ENSSSCG00000021255/ENSSSCG00000033684
BP	GO:0001936	regulation of endothelial cell proliferation	16/1419	67/10877	0.0108602964510457	0.396488092167106	ENSSSCG00000024168/ENSSSCG00000005382/ENSSSCG00000004755/ENSSSCG00000002254/ENSSSCG00000022447/ENSSSCG00000009434/ENSSSCG00000000272/ENSSSCG00000037719/ENSSSCG00000011739/ENSSSCG00000017268/ENSSSCG00000035859/ENSSSCG00000027072/ENSSSCG00000010235/ENSSSCG00000031538/ENSSSCG00000005844/ENSSSCG00000003088	AIMP1/TGFBR1/DLL4/NR2F2/F3/RGCC/SP1/PDPK1/PDCD10/PRKCA/WNT5A/ATPIF1/SIRT1/ANG/NRARP/APOE	16	5	ENSSSCG00000002254/ENSSSCG00000000272/ENSSSCG00000037719/ENSSSCG00000017268/ENSSSCG00000035859	11	ENSSSCG00000024168/ENSSSCG00000005382/ENSSSCG00000004755/ENSSSCG00000022447/ENSSSCG00000009434/ENSSSCG00000011739/ENSSSCG00000027072/ENSSSCG00000010235/ENSSSCG00000031538/ENSSSCG00000005844/ENSSSCG00000003088
BP	GO:0051603	proteolysis involved in cellular protein catabolic process	77/1419	459/10877	0.01102591337564	0.396488092167106	ENSSSCG00000006530/ENSSSCG00000016653/ENSSSCG00000027594/ENSSSCG00000017043/ENSSSCG00000040663/ENSSSCG00000001488/ENSSSCG00000004927/ENSSSCG00000006663/ENSSSCG00000003928/ENSSSCG00000006066/ENSSSCG00000003820/ENSSSCG00000008740/ENSSSCG00000011510/ENSSSCG00000040751/ENSSSCG00000004339/ENSSSCG00000010563/ENSSSCG00000029198/ENSSSCG00000016017/ENSSSCG00000011765/ENSSSCG00000004717/ENSSSCG00000032332/…	EFNA1/DNAJB9/USP16/RNF145/HERPUD1/GCLC/CLPX/OTUD7B/PLK3/RNF19A/USP1/FBXL5/TMF1/DDIT3/UFL1/BTRC/CUL5/DNAJC10/USP13/UBR1/SOCS4/AREL1/UCHL5/DTL/TMTC3/SDF2L1/UBE2H/MTM1/RNF111/TNFAIP3/PBK/KLHL15/PRICKLE1/KIF14/VPS4B/SMARCC1/USP8/FBXL3/USP15/TOPORS/TBL1XR1/ISG15/CUL4B/TMEM67/PSMC6/UBXN2B/TRIP12/USP47/SPOPL/CBL/USP27X/PSMA3/USP34/HUWE1/-/ATPIF1/UBR4/-/SVIP/ZNRF3/YOD1/PSMB10/SIRT1/FBXW11/USP25/CTSS/KCTD…	77	28	ENSSSCG00000017043/ENSSSCG00000001488/ENSSSCG00000006663/ENSSSCG00000008740/ENSSSCG00000010563/ENSSSCG00000011765/ENSSSCG00000002370/ENSSSCG00000015600/ENSSSCG00000016564/ENSSSCG00000012742/ENSSSCG00000004589/ENSSSCG00000034491/ENSSSCG00000010912/ENSSSCG00000011340/ENSSSCG00000006239/ENSSSCG00000024373/ENSSSCG00000015115/ENSSSCG00000012305/ENSSSCG00000012328/ENSSSCG00000003488/ENSSSCG00000009971/…	49	ENSSSCG00000006530/ENSSSCG00000016653/ENSSSCG00000027594/ENSSSCG00000040663/ENSSSCG00000004927/ENSSSCG00000003928/ENSSSCG00000006066/ENSSSCG00000003820/ENSSSCG00000011510/ENSSSCG00000040751/ENSSSCG00000004339/ENSSSCG00000029198/ENSSSCG00000016017/ENSSSCG00000004717/ENSSSCG00000032332/ENSSSCG00000010802/ENSSSCG00000000927/ENSSSCG00000010085/ENSSSCG00000004154/ENSSSCG00000009671/ENSSSCG00000027652/…
BP	GO:0071478	cellular response to radiation	21/1419	96/10877	0.0110382783937918	0.396488092167106	ENSSSCG00000003112/ENSSSCG00000023303/ENSSSCG00000015602/ENSSSCG00000035746/ENSSSCG00000023724/ENSSSCG00000001565/ENSSSCG00000016842/ENSSSCG00000009671/ENSSSCG00000011679/ENSSSCG00000014336/ENSSSCG00000015215/ENSSSCG00000029478/ENSSSCG00000013402/ENSSSCG00000006954/ENSSSCG00000010235/ENSSSCG00000028850/ENSSSCG00000024019/ENSSSCG00000025606/ENSSSCG00000007951/ENSSSCG00000000068/ENSSSCG00000007881	-/FIGNL1/INTS7/ECT2/ZBTB1/CDKN1A/NIPBL/PBK/ATR/EGR1/CHEK1/CUL4B/USP47/EEF1D/SIRT1/RPL26/-/ATM/CREBBP/EP300/ERCC4	21	6	ENSSSCG00000023303/ENSSSCG00000015602/ENSSSCG00000014336/ENSSSCG00000007951/ENSSSCG00000000068/ENSSSCG00000007881	15	ENSSSCG00000003112/ENSSSCG00000035746/ENSSSCG00000023724/ENSSSCG00000001565/ENSSSCG00000016842/ENSSSCG00000009671/ENSSSCG00000011679/ENSSSCG00000015215/ENSSSCG00000029478/ENSSSCG00000013402/ENSSSCG00000006954/ENSSSCG00000010235/ENSSSCG00000028850/ENSSSCG00000024019/ENSSSCG00000025606
BP	GO:1900542	regulation of purine nucleotide metabolic process	21/1419	96/10877	0.0110382783937918	0.396488092167106	ENSSSCG00000036893/ENSSSCG00000005096/ENSSSCG00000031888/ENSSSCG00000016929/ENSSSCG00000009217/ENSSSCG00000031159/ENSSSCG00000011760/ENSSSCG00000003576/ENSSSCG00000000006/ENSSSCG00000035859/ENSSSCG00000006302/ENSSSCG00000027072/ENSSSCG00000031733/ENSSSCG00000000033/ENSSSCG00000010235/ENSSSCG00000030668/ENSSSCG00000024777/ENSSSCG00000010054/ENSSSCG00000003088/ENSSSCG00000018039/ENSSSCG00000002648	PTHLH/HIF1A/DDIT4/PDE4D/PKD2/BEND3/TBL1XR1/GPR3/PPARA/WNT5A/GPR161/ATPIF1/AKAP12/TSPO/SIRT1/UQCC2/HDAC4/ADORA2A/APOE/NCOR1/CBFA2T3	21	9	ENSSSCG00000009217/ENSSSCG00000031159/ENSSSCG00000000006/ENSSSCG00000035859/ENSSSCG00000006302/ENSSSCG00000031733/ENSSSCG00000024777/ENSSSCG00000018039/ENSSSCG00000002648	12	ENSSSCG00000036893/ENSSSCG00000005096/ENSSSCG00000031888/ENSSSCG00000016929/ENSSSCG00000011760/ENSSSCG00000003576/ENSSSCG00000027072/ENSSSCG00000000033/ENSSSCG00000010235/ENSSSCG00000030668/ENSSSCG00000010054/ENSSSCG00000003088
BP	GO:0051208	sequestering of calcium ion	14/1419	56/10877	0.0110766080248195	0.396488092167106	ENSSSCG00000035355/ENSSSCG00000040751/ENSSSCG00000016929/ENSSSCG00000009217/ENSSSCG00000004460/ENSSSCG00000037719/ENSSSCG00000031493/ENSSSCG00000009125/ENSSSCG00000001975/ENSSSCG00000040125/ENSSSCG00000011681/ENSSSCG00000006231/ENSSSCG00000015136/ENSSSCG00000006390	F2R/DDIT3/PDE4D/PKD2/IBTK/PDPK1/CYBA/ANK2/PRKD1/NOL3/TRPC1/CHD7/UBASH3B/CASQ1	14	7	ENSSSCG00000035355/ENSSSCG00000009217/ENSSSCG00000037719/ENSSSCG00000009125/ENSSSCG00000001975/ENSSSCG00000006231/ENSSSCG00000015136	7	ENSSSCG00000040751/ENSSSCG00000016929/ENSSSCG00000004460/ENSSSCG00000031493/ENSSSCG00000040125/ENSSSCG00000011681/ENSSSCG00000006390
BP	GO:0051282	regulation of sequestering of calcium ion	14/1419	56/10877	0.0110766080248195	0.396488092167106	ENSSSCG00000035355/ENSSSCG00000040751/ENSSSCG00000016929/ENSSSCG00000009217/ENSSSCG00000004460/ENSSSCG00000037719/ENSSSCG00000031493/ENSSSCG00000009125/ENSSSCG00000001975/ENSSSCG00000040125/ENSSSCG00000011681/ENSSSCG00000006231/ENSSSCG00000015136/ENSSSCG00000006390	F2R/DDIT3/PDE4D/PKD2/IBTK/PDPK1/CYBA/ANK2/PRKD1/NOL3/TRPC1/CHD7/UBASH3B/CASQ1	14	7	ENSSSCG00000035355/ENSSSCG00000009217/ENSSSCG00000037719/ENSSSCG00000009125/ENSSSCG00000001975/ENSSSCG00000006231/ENSSSCG00000015136	7	ENSSSCG00000040751/ENSSSCG00000016929/ENSSSCG00000004460/ENSSSCG00000031493/ENSSSCG00000040125/ENSSSCG00000011681/ENSSSCG00000006390
BP	GO:0006401	RNA catabolic process	24/1419	114/10877	0.0111733651879436	0.396699884355689	ENSSSCG00000006752/ENSSSCG00000024411/ENSSSCG00000016911/ENSSSCG00000031882/ENSSSCG00000008452/ENSSSCG00000006033/ENSSSCG00000006078/ENSSSCG00000021586/ENSSSCG00000024596/ENSSSCG00000006983/ENSSSCG00000021354/ENSSSCG00000034373/ENSSSCG00000012727/ENSSSCG00000010240/ENSSSCG00000000078/ENSSSCG00000011117/ENSSSCG00000025606/ENSSSCG00000012979/ENSSSCG00000011601/ENSSSCG00000005925/ENSSSCG00000009358/…	CSDE1/-/SKIV2L2/PNPT1/LRPPRC/EIF3E/POP1/ZHX2/NOCT/CNOT7/CNOT4/TNRC6C/FMR1/DNA2/TNRC6B/-/ATM/RNASEH2C/LSM3/EXOSC4/EXOSC8/-/DROSHA/DIS3L	24	8	ENSSSCG00000024411/ENSSSCG00000006078/ENSSSCG00000021586/ENSSSCG00000021354/ENSSSCG00000034373/ENSSSCG00000000078/ENSSSCG00000016809/ENSSSCG00000004941	16	ENSSSCG00000006752/ENSSSCG00000016911/ENSSSCG00000031882/ENSSSCG00000008452/ENSSSCG00000006033/ENSSSCG00000024596/ENSSSCG00000006983/ENSSSCG00000012727/ENSSSCG00000010240/ENSSSCG00000011117/ENSSSCG00000025606/ENSSSCG00000012979/ENSSSCG00000011601/ENSSSCG00000005925/ENSSSCG00000009358/ENSSSCG00000026064
BP	GO:0019941	modification-dependent protein catabolic process	67/1419	392/10877	0.0113808805946373	0.399691155955414	ENSSSCG00000016653/ENSSSCG00000027594/ENSSSCG00000017043/ENSSSCG00000040663/ENSSSCG00000001488/ENSSSCG00000006663/ENSSSCG00000003928/ENSSSCG00000006066/ENSSSCG00000003820/ENSSSCG00000008740/ENSSSCG00000040751/ENSSSCG00000004339/ENSSSCG00000010563/ENSSSCG00000029198/ENSSSCG00000016017/ENSSSCG00000011765/ENSSSCG00000004717/ENSSSCG00000032332/ENSSSCG00000002370/ENSSSCG00000010802/ENSSSCG00000015600/…	DNAJB9/USP16/RNF145/HERPUD1/GCLC/OTUD7B/PLK3/RNF19A/USP1/FBXL5/DDIT3/UFL1/BTRC/CUL5/DNAJC10/USP13/UBR1/SOCS4/AREL1/UCHL5/DTL/UBE2H/MTM1/RNF111/TNFAIP3/PBK/KLHL15/PRICKLE1/KIF14/VPS4B/SMARCC1/USP8/FBXL3/USP15/TOPORS/TBL1XR1/ISG15/CUL4B/TMEM67/PSMC6/UBXN2B/TRIP12/USP47/SPOPL/CBL/USP27X/PSMA3/USP34/HUWE1/-/UBR4/-/SVIP/ZNRF3/YOD1/SIRT1/FBXW11/USP25/KCTD21/NOP53/UBA6/RNF146/UBE2B/RNF216/PRKN/DZIP3/CBF…	67	26	ENSSSCG00000017043/ENSSSCG00000001488/ENSSSCG00000006663/ENSSSCG00000008740/ENSSSCG00000010563/ENSSSCG00000011765/ENSSSCG00000002370/ENSSSCG00000015600/ENSSSCG00000016564/ENSSSCG00000012742/ENSSSCG00000004589/ENSSSCG00000034491/ENSSSCG00000010912/ENSSSCG00000011340/ENSSSCG00000006239/ENSSSCG00000024373/ENSSSCG00000015115/ENSSSCG00000012305/ENSSSCG00000012328/ENSSSCG00000003488/ENSSSCG00000009971/…	41	ENSSSCG00000016653/ENSSSCG00000027594/ENSSSCG00000040663/ENSSSCG00000003928/ENSSSCG00000006066/ENSSSCG00000003820/ENSSSCG00000040751/ENSSSCG00000004339/ENSSSCG00000029198/ENSSSCG00000016017/ENSSSCG00000004717/ENSSSCG00000032332/ENSSSCG00000010802/ENSSSCG00000004154/ENSSSCG00000009671/ENSSSCG00000027652/ENSSSCG00000004893/ENSSSCG00000004639/ENSSSCG00000009472/ENSSSCG00000000457/ENSSSCG00000011004/…
BP	GO:0090199	regulation of release of cytochrome c from mitochondria	8/1419	25/10877	0.0114406673905259	0.399691155955414	ENSSSCG00000032434/ENSSSCG00000003112/ENSSSCG00000006496/ENSSSCG00000011822/ENSSSCG00000040125/ENSSSCG00000013033/ENSSSCG00000004032/ENSSSCG00000007163	PLAUR/-/LMNA/OPA1/NOL3/BAD/PRKN/AVP	8	1	ENSSSCG00000004032	7	ENSSSCG00000032434/ENSSSCG00000003112/ENSSSCG00000006496/ENSSSCG00000011822/ENSSSCG00000040125/ENSSSCG00000013033/ENSSSCG00000007163
BP	GO:0006511	ubiquitin-dependent protein catabolic process	66/1419	386/10877	0.0118473057102431	0.404149721308408	ENSSSCG00000016653/ENSSSCG00000027594/ENSSSCG00000017043/ENSSSCG00000040663/ENSSSCG00000001488/ENSSSCG00000006663/ENSSSCG00000003928/ENSSSCG00000006066/ENSSSCG00000003820/ENSSSCG00000008740/ENSSSCG00000040751/ENSSSCG00000004339/ENSSSCG00000010563/ENSSSCG00000029198/ENSSSCG00000016017/ENSSSCG00000011765/ENSSSCG00000004717/ENSSSCG00000032332/ENSSSCG00000002370/ENSSSCG00000010802/ENSSSCG00000015600/…	DNAJB9/USP16/RNF145/HERPUD1/GCLC/OTUD7B/PLK3/RNF19A/USP1/FBXL5/DDIT3/UFL1/BTRC/CUL5/DNAJC10/USP13/UBR1/SOCS4/AREL1/UCHL5/DTL/UBE2H/MTM1/RNF111/TNFAIP3/PBK/KLHL15/PRICKLE1/KIF14/VPS4B/SMARCC1/USP8/FBXL3/USP15/TOPORS/TBL1XR1/CUL4B/TMEM67/PSMC6/UBXN2B/TRIP12/USP47/SPOPL/CBL/USP27X/PSMA3/USP34/HUWE1/-/UBR4/-/SVIP/ZNRF3/YOD1/SIRT1/FBXW11/USP25/KCTD21/NOP53/UBA6/RNF146/UBE2B/RNF216/PRKN/DZIP3/CBFA2T3	66	26	ENSSSCG00000017043/ENSSSCG00000001488/ENSSSCG00000006663/ENSSSCG00000008740/ENSSSCG00000010563/ENSSSCG00000011765/ENSSSCG00000002370/ENSSSCG00000015600/ENSSSCG00000016564/ENSSSCG00000012742/ENSSSCG00000004589/ENSSSCG00000034491/ENSSSCG00000010912/ENSSSCG00000011340/ENSSSCG00000006239/ENSSSCG00000024373/ENSSSCG00000015115/ENSSSCG00000012305/ENSSSCG00000012328/ENSSSCG00000003488/ENSSSCG00000009971/…	40	ENSSSCG00000016653/ENSSSCG00000027594/ENSSSCG00000040663/ENSSSCG00000003928/ENSSSCG00000006066/ENSSSCG00000003820/ENSSSCG00000040751/ENSSSCG00000004339/ENSSSCG00000029198/ENSSSCG00000016017/ENSSSCG00000004717/ENSSSCG00000032332/ENSSSCG00000010802/ENSSSCG00000004154/ENSSSCG00000009671/ENSSSCG00000027652/ENSSSCG00000004893/ENSSSCG00000004639/ENSSSCG00000009472/ENSSSCG00000000457/ENSSSCG00000011004/…
BP	GO:0034248	regulation of cellular amide metabolic process	43/1419	234/10877	0.011871279824321	0.404149721308408	ENSSSCG00000006530/ENSSSCG00000027594/ENSSSCG00000012252/ENSSSCG00000008452/ENSSSCG00000016907/ENSSSCG00000016291/ENSSSCG00000003928/ENSSSCG00000003155/ENSSSCG00000011769/ENSSSCG00000006033/ENSSSCG00000008180/ENSSSCG00000010949/ENSSSCG00000036381/ENSSSCG00000011162/ENSSSCG00000038410/ENSSSCG00000006983/ENSSSCG00000010030/ENSSSCG00000017066/ENSSSCG00000028225/ENSSSCG00000028516/ENSSSCG00000004387/…	EFNA1/USP16/DDX3X/LRPPRC/DHX29/GIGYF2/PLK3/PPP1R15A/FXR1/EIF3E/EIF5B/DAPK1/RBMS3/LARP4B/CPEB2/CNOT7/EIF4ENIF1/GEMIN5/DICER1/LARP4/FOXO3/TNRC6C/UHMK1/FMR1/TNRC6B/TPR/EIF4E/-/SECISBP2L/PER1/SORL1/EIF2AK2/EGFR/PUM1/LIMD1/RPL26/NEURL1/UQCC2/LARP1/DROSHA/TRMT10C/APOE/NCOR1	43	17	ENSSSCG00000016291/ENSSSCG00000010949/ENSSSCG00000011162/ENSSSCG00000010030/ENSSSCG00000017066/ENSSSCG00000028225/ENSSSCG00000004387/ENSSSCG00000034373/ENSSSCG00000000078/ENSSSCG00000015135/ENSSSCG00000022126/ENSSSCG00000003591/ENSSSCG00000011313/ENSSSCG00000010603/ENSSSCG00000017069/ENSSSCG00000016809/ENSSSCG00000018039	26	ENSSSCG00000006530/ENSSSCG00000027594/ENSSSCG00000012252/ENSSSCG00000008452/ENSSSCG00000016907/ENSSSCG00000003928/ENSSSCG00000003155/ENSSSCG00000011769/ENSSSCG00000006033/ENSSSCG00000008180/ENSSSCG00000036381/ENSSSCG00000038410/ENSSSCG00000006983/ENSSSCG00000028516/ENSSSCG00000006342/ENSSSCG00000012727/ENSSSCG00000015576/ENSSSCG00000028420/ENSSSCG00000016044/ENSSSCG00000004653/ENSSSCG00000017983/…
BP	GO:0071214	cellular response to abiotic stimulus	32/1419	164/10877	0.0120199927417875	0.404149721308408	ENSSSCG00000003112/ENSSSCG00000012252/ENSSSCG00000014277/ENSSSCG00000023303/ENSSSCG00000015801/ENSSSCG00000034012/ENSSSCG00000015602/ENSSSCG00000030957/ENSSSCG00000035746/ENSSSCG00000009217/ENSSSCG00000023724/ENSSSCG00000001565/ENSSSCG00000016842/ENSSSCG00000009671/ENSSSCG00000011679/ENSSSCG00000014336/ENSSSCG00000015215/ENSSSCG00000029478/ENSSSCG00000017330/ENSSSCG00000013402/ENSSSCG00000011867/…	-/DDX3X/IRF1/FIGNL1/TLR3/CASP3/INTS7/NFKB1/ECT2/PKD2/ZBTB1/CDKN1A/NIPBL/PBK/ATR/EGR1/CHEK1/CUL4B/MAP3K14/USP47/MYLK/EEF1D/SIRT1/RPL26/-/ATM/BAD/CREBBP/EP300/SLC12A6/FAS/ERCC4	32	11	ENSSSCG00000023303/ENSSSCG00000015602/ENSSSCG00000030957/ENSSSCG00000009217/ENSSSCG00000014336/ENSSSCG00000011867/ENSSSCG00000007951/ENSSSCG00000000068/ENSSSCG00000002243/ENSSSCG00000010448/ENSSSCG00000007881	21	ENSSSCG00000003112/ENSSSCG00000012252/ENSSSCG00000014277/ENSSSCG00000015801/ENSSSCG00000034012/ENSSSCG00000035746/ENSSSCG00000023724/ENSSSCG00000001565/ENSSSCG00000016842/ENSSSCG00000009671/ENSSSCG00000011679/ENSSSCG00000015215/ENSSSCG00000029478/ENSSSCG00000017330/ENSSSCG00000013402/ENSSSCG00000006954/ENSSSCG00000010235/ENSSSCG00000028850/ENSSSCG00000024019/ENSSSCG00000025606/ENSSSCG00000013033
BP	GO:0044839	cell cycle G2/M phase transition	19/1419	85/10877	0.0120738878460166	0.404149721308408	ENSSSCG00000006127/ENSSSCG00000027251/ENSSSCG00000012307/ENSSSCG00000021966/ENSSSCG00000035639/ENSSSCG00000015600/ENSSSCG00000001565/ENSSSCG00000007056/ENSSSCG00000010912/ENSSSCG00000004893/ENSSSCG00000015215/ENSSSCG00000013402/ENSSSCG00000001880/ENSSSCG00000015581/ENSSSCG00000025606/ENSSSCG00000022774/ENSSSCG00000040355/ENSSSCG00000036892/ENSSSCG00000022227	NBN/CDC7/CCNB3/TOPBP1/NAE1/DTL/CDKN1A/PLCB1/KIF14/VPS4B/CHEK1/USP47/SIN3A/CENPF/ATM/NOP53/TICRR/GPR132/BRD4	19	7	ENSSSCG00000027251/ENSSSCG00000012307/ENSSSCG00000015600/ENSSSCG00000010912/ENSSSCG00000001880/ENSSSCG00000040355/ENSSSCG00000022227	12	ENSSSCG00000006127/ENSSSCG00000021966/ENSSSCG00000035639/ENSSSCG00000001565/ENSSSCG00000007056/ENSSSCG00000004893/ENSSSCG00000015215/ENSSSCG00000013402/ENSSSCG00000015581/ENSSSCG00000025606/ENSSSCG00000022774/ENSSSCG00000036892
BP	GO:0003272	endocardial cushion formation	6/1419	16/10877	0.0121894769602067	0.404149721308408	ENSSSCG00000032613/ENSSSCG00000005382/ENSSSCG00000015874/ENSSSCG00000010360/ENSSSCG00000022155/ENSSSCG00000029189	SNAI1/TGFBR1/ACVR1/BMPR1A/RBPJ/DCHS1	6	2	ENSSSCG00000015874/ENSSSCG00000029189	4	ENSSSCG00000032613/ENSSSCG00000005382/ENSSSCG00000010360/ENSSSCG00000022155
BP	GO:2000403	positive regulation of lymphocyte migration	6/1419	16/10877	0.0121894769602067	0.404149721308408	ENSSSCG00000004595/ENSSSCG00000017705/ENSSSCG00000016254/ENSSSCG00000005240/ENSSSCG00000035859/ENSSSCG00000039500	ADAM10/CCL5/CCL20/DOCK8/WNT5A/-	6	2	ENSSSCG00000005240/ENSSSCG00000035859	4	ENSSSCG00000004595/ENSSSCG00000017705/ENSSSCG00000016254/ENSSSCG00000039500
BP	GO:0007051	spindle organization	26/1419	127/10877	0.0122161124828738	0.404149721308408	ENSSSCG00000010625/ENSSSCG00000016925/ENSSSCG00000010471/ENSSSCG00000012642/ENSSSCG00000030443/ENSSSCG00000005173/ENSSSCG00000012434/ENSSSCG00000020702/ENSSSCG00000004893/ENSSSCG00000024663/ENSSSCG00000017514/ENSSSCG00000024722/ENSSSCG00000039157/ENSSSCG00000023296/ENSSSCG00000022039/ENSSSCG00000015576/ENSSSCG00000027557/ENSSSCG00000010737/ENSSSCG00000012325/ENSSSCG00000014214/ENSSSCG00000015924/…	SMC3/PLK2/KIF11/STAG2/INTS13/HAUS6/ATRX/SENP6/VPS4B/SPICE1/KPNB1/PIBF1/CLASP1/CENPE/STARD9/TPR/CDC14B/ABRAXAS2/SMC1A/TRIM36/SPC25/-/CEP126/GNAI1/CEP120/NCOR1	26	9	ENSSSCG00000016925/ENSSSCG00000024663/ENSSSCG00000017514/ENSSSCG00000039157/ENSSSCG00000022039/ENSSSCG00000027557/ENSSSCG00000010737/ENSSSCG00000012325/ENSSSCG00000018039	17	ENSSSCG00000010625/ENSSSCG00000010471/ENSSSCG00000012642/ENSSSCG00000030443/ENSSSCG00000005173/ENSSSCG00000012434/ENSSSCG00000020702/ENSSSCG00000004893/ENSSSCG00000024722/ENSSSCG00000023296/ENSSSCG00000015576/ENSSSCG00000014214/ENSSSCG00000015924/ENSSSCG00000010214/ENSSSCG00000014979/ENSSSCG00000015407/ENSSSCG00000014239
BP	GO:0003208	cardiac ventricle morphogenesis	12/1419	46/10877	0.0128195941109465	0.417784831958982	ENSSSCG00000005096/ENSSSCG00000005382/ENSSSCG00000004755/ENSSSCG00000010360/ENSSSCG00000039756/ENSSSCG00000023784/ENSSSCG00000025334/ENSSSCG00000040746/ENSSSCG00000022155/ENSSSCG00000011859/ENSSSCG00000006231/ENSSSCG00000011441	HIF1A/TGFBR1/DLL4/BMPR1A/FOXC1/SEMA3C/POU4F1/LRP2/RBPJ/HEG1/CHD7/TNNC1	12	5	ENSSSCG00000039756/ENSSSCG00000025334/ENSSSCG00000040746/ENSSSCG00000011859/ENSSSCG00000006231	7	ENSSSCG00000005096/ENSSSCG00000005382/ENSSSCG00000004755/ENSSSCG00000010360/ENSSSCG00000023784/ENSSSCG00000022155/ENSSSCG00000011441
BP	GO:0051310	metaphase plate congression	12/1419	46/10877	0.0128195941109465	0.417784831958982	ENSSSCG00000007351/ENSSSCG00000006105/ENSSSCG00000010912/ENSSSCG00000004893/ENSSSCG00000024663/ENSSSCG00000017514/ENSSSCG00000024722/ENSSSCG00000023296/ENSSSCG00000015581/ENSSSCG00000008921/ENSSSCG00000001731/ENSSSCG00000013332	FAM83D/GEM/KIF14/VPS4B/SPICE1/KPNB1/PIBF1/CENPE/CENPF/CENPC/CENPQ/KIF18A	12	4	ENSSSCG00000007351/ENSSSCG00000010912/ENSSSCG00000024663/ENSSSCG00000017514	8	ENSSSCG00000006105/ENSSSCG00000004893/ENSSSCG00000024722/ENSSSCG00000023296/ENSSSCG00000015581/ENSSSCG00000008921/ENSSSCG00000001731/ENSSSCG00000013332
BP	GO:0044782	cilium organization	40/1419	216/10877	0.0131277749842165	0.420790724819453	ENSSSCG00000006994/ENSSSCG00000011733/ENSSSCG00000009818/ENSSSCG00000008406/ENSSSCG00000004601/ENSSSCG00000010984/ENSSSCG00000003107/ENSSSCG00000036434/ENSSSCG00000014283/ENSSSCG00000024722/ENSSSCG00000006108/ENSSSCG00000021138/ENSSSCG00000015931/ENSSSCG00000038383/ENSSSCG00000027997/ENSSSCG00000010651/ENSSSCG00000004166/ENSSSCG00000004289/ENSSSCG00000027557/ENSSSCG00000000926/ENSSSCG00000029943/…	PCM1/-/IFT81/CCDC88A/MNS1/KIF24/ARHGAP35/TPGS1/KIF3A/PIBF1/TMEM67/CEP250/BBS5/DYNC2LI1/NME5/ABLIM1/AHI1/CEP162/CDC14B/CEP290/SCLT1/B9D2/CEP83/IFT74/CEP135/CEP89/NEURL1/CCDC39/CEP126/UBE2B/PIH1D3/ASAP1/-/INTU/CCP110/GORAB/CEP120/IQUB/JHY/TBC1D32	40	9	ENSSSCG00000010984/ENSSSCG00000003107/ENSSSCG00000021138/ENSSSCG00000010651/ENSSSCG00000027557/ENSSSCG00000025152/ENSSSCG00000010603/ENSSSCG00000028759/ENSSSCG00000015138	31	ENSSSCG00000006994/ENSSSCG00000011733/ENSSSCG00000009818/ENSSSCG00000008406/ENSSSCG00000004601/ENSSSCG00000036434/ENSSSCG00000014283/ENSSSCG00000024722/ENSSSCG00000006108/ENSSSCG00000015931/ENSSSCG00000038383/ENSSSCG00000027997/ENSSSCG00000004166/ENSSSCG00000004289/ENSSSCG00000000926/ENSSSCG00000029943/ENSSSCG00000003013/ENSSSCG00000024563/ENSSSCG00000005124/ENSSSCG00000022283/ENSSSCG00000011768/…
BP	GO:0001503	ossification	42/1419	229/10877	0.0132008997710705	0.420790724819453	ENSSSCG00000010224/ENSSSCG00000036893/ENSSSCG00000005096/ENSSSCG00000016916/ENSSSCG00000023303/ENSSSCG00000032566/ENSSSCG00000032613/ENSSSCG00000002344/ENSSSCG00000004339/ENSSSCG00000007520/ENSSSCG00000011733/ENSSSCG00000015874/ENSSSCG00000024916/ENSSSCG00000024596/ENSSSCG00000010360/ENSSSCG00000004192/ENSSSCG00000011628/ENSSSCG00000015485/ENSSSCG00000039756/ENSSSCG00000000804/ENSSSCG00000016842/…	EGR2/PTHLH/HIF1A/IL6ST/FIGNL1/ZHX3/SNAI1/RIOX1/UFL1/GNAS/-/ACVR1/DHX36/NOCT/BMPR1A/CTGF/DNAJC13/SUCO/FOXC1/ANO6/NIPBL/CHSY1/ISG15/BCAP29/SEMA7A/SMAD5/WNT5A/CSF1/TNN/VCAN/PRKD1/RBPJ/-/LIMD1/SLC26A2/FBN2/HDAC4/INTU/TNFRSF11A/DCHS1/CYP24A1/CTHRC1	42	21	ENSSSCG00000010224/ENSSSCG00000023303/ENSSSCG00000032566/ENSSSCG00000002344/ENSSSCG00000007520/ENSSSCG00000015874/ENSSSCG00000004192/ENSSSCG00000039756/ENSSSCG00000000804/ENSSSCG00000004825/ENSSSCG00000035859/ENSSSCG00000015507/ENSSSCG00000001975/ENSSSCG00000035371/ENSSSCG00000011313/ENSSSCG00000039045/ENSSSCG00000014256/ENSSSCG00000024777/ENSSSCG00000004898/ENSSSCG00000029189/ENSSSCG00000007486	21	ENSSSCG00000036893/ENSSSCG00000005096/ENSSSCG00000016916/ENSSSCG00000032613/ENSSSCG00000004339/ENSSSCG00000011733/ENSSSCG00000024916/ENSSSCG00000024596/ENSSSCG00000010360/ENSSSCG00000011628/ENSSSCG00000015485/ENSSSCG00000016842/ENSSSCG00000040575/ENSSSCG00000022869/ENSSSCG00000023165/ENSSSCG00000014319/ENSSSCG00000037449/ENSSSCG00000014136/ENSSSCG00000022155/ENSSSCG00000009079/ENSSSCG00000006051
BP	GO:0034470	ncRNA processing	42/1419	229/10877	0.0132008997710705	0.420790724819453	ENSSSCG00000006727/ENSSSCG00000016911/ENSSSCG00000015602/ENSSSCG00000006078/ENSSSCG00000022225/ENSSSCG00000004711/ENSSSCG00000008990/ENSSSCG00000028225/ENSSSCG00000009384/ENSSSCG00000001024/ENSSSCG00000034572/ENSSSCG00000002706/ENSSSCG00000021466/ENSSSCG00000001080/ENSSSCG00000005441/ENSSSCG00000011529/ENSSSCG00000002529/ENSSSCG00000016087/ENSSSCG00000026812/ENSSSCG00000031838/ENSSSCG00000021309/…	WDR3/SKIV2L2/INTS7/POP1/NOP58/LCMT2/MRPL1/DICER1/INTS6/RIOK1/MPHOSPH6/ADAT1/BMT2/CDKAL1/-/TRNT1/RPS21/TYW5/EMG1/RPS27/TRDMT1/HEATR1/TYW3/RPS16/-/RPL35/RPL26/NOL8/-/DDX52/OSGEPL1/RPS19/PUS3/EXOSC4/-/RTRAF/WDR36/EXOSC8/DROSHA/DUS4L/TRMT10C/DIS3L	42	12	ENSSSCG00000006727/ENSSSCG00000015602/ENSSSCG00000006078/ENSSSCG00000004711/ENSSSCG00000028225/ENSSSCG00000001024/ENSSSCG00000002706/ENSSSCG00000005441/ENSSSCG00000010145/ENSSSCG00000024479/ENSSSCG00000016809/ENSSSCG00000004941	30	ENSSSCG00000016911/ENSSSCG00000022225/ENSSSCG00000008990/ENSSSCG00000009384/ENSSSCG00000034572/ENSSSCG00000021466/ENSSSCG00000001080/ENSSSCG00000011529/ENSSSCG00000002529/ENSSSCG00000016087/ENSSSCG00000026812/ENSSSCG00000031838/ENSSSCG00000021309/ENSSSCG00000003779/ENSSSCG00000020817/ENSSSCG00000003930/ENSSSCG00000034227/ENSSSCG00000028850/ENSSSCG00000008069/ENSSSCG00000024019/ENSSSCG00000021275/…
BP	GO:0045597	positive regulation of cell differentiation	82/1419	497/10877	0.0133742491038986	0.420940511484488	ENSSSCG00000005096/ENSSSCG00000016916/ENSSSCG00000033228/ENSSSCG00000033025/ENSSSCG00000032566/ENSSSCG00000032613/ENSSSCG00000012713/ENSSSCG00000004339/ENSSSCG00000002383/ENSSSCG00000005382/ENSSSCG00000007520/ENSSSCG00000015874/ENSSSCG00000005267/ENSSSCG00000035746/ENSSSCG00000009434/ENSSSCG00000024596/ENSSSCG00000010360/ENSSSCG00000023724/ENSSSCG00000004192/ENSSSCG00000010457/ENSSSCG00000001021/…	HIF1A/IL6ST/SPAG9/C21orf91/ZHX3/SNAI1/ATP11C/UFL1/FOS/TGFBR1/GNAS/ACVR1/ANXA1/ECT2/RGCC/NOCT/BMPR1A/ZBTB1/CTGF/KIF20B/RREB1/CBFA2T2/DLG5/SUCO/ARHGAP35/FOXC1/NIPBL/PPP2R3C/SEMA3C/-/IL1RAP/VAMP7/PLCB1/FOXO3/STK4/ISG15/SEMA7A/SEMA3A/SMAD5/WNT5A/CSF1/HOXD3/SEMA6A/AHI1/POU4F1/PRKAR2A/LRP2/ZNF609/NCOA3/PRKD1/RBPJ/ADAMTS9/CYP26B1/ACVR1B/SULT2B1/SIRT1/ATOH1/DOCK5/NEURL1/BAD/TNFRSF12A/GOLGA4/ADRA2B/MACF1/…	82	41	ENSSSCG00000032566/ENSSSCG00000002383/ENSSSCG00000007520/ENSSSCG00000015874/ENSSSCG00000004192/ENSSSCG00000001021/ENSSSCG00000027410/ENSSSCG00000026268/ENSSSCG00000003107/ENSSSCG00000039756/ENSSSCG00000004387/ENSSSCG00000030820/ENSSSCG00000035859/ENSSSCG00000015985/ENSSSCG00000014224/ENSSSCG00000025334/ENSSSCG00000011363/ENSSSCG00000040746/ENSSSCG00000004551/ENSSSCG00000007458/ENSSSCG00000001975/…	41	ENSSSCG00000005096/ENSSSCG00000016916/ENSSSCG00000033228/ENSSSCG00000033025/ENSSSCG00000032613/ENSSSCG00000012713/ENSSSCG00000004339/ENSSSCG00000005382/ENSSSCG00000005267/ENSSSCG00000035746/ENSSSCG00000009434/ENSSSCG00000024596/ENSSSCG00000010360/ENSSSCG00000023724/ENSSSCG00000010457/ENSSSCG00000015485/ENSSSCG00000016842/ENSSSCG00000031498/ENSSSCG00000023784/ENSSSCG00000011081/ENSSSCG00000021206/…
BP	GO:0000724	double-strand break repair via homologous recombination	18/1419	80/10877	0.0133983812906672	0.420940511484488	ENSSSCG00000024419/ENSSSCG00000023303/ENSSSCG00000008614/ENSSSCG00000006127/ENSSSCG00000027251/ENSSSCG00000007954/ENSSSCG00000002298/ENSSSCG00000005255/ENSSSCG00000037216/ENSSSCG00000027652/ENSSSCG00000000754/ENSSSCG00000000580/ENSSSCG00000016395/ENSSSCG00000007047/ENSSSCG00000025606/ENSSSCG00000007881/ENSSSCG00000010608/ENSSSCG00000012549	-/FIGNL1/SMC6/NBN/CDC7/SLX4/ZFYVE26/SMC5/PPP4R2/KLHL15/RAD52/RECQL/RIF1/MCM8/ATM/ERCC4/SFR1/CXorf57	18	6	ENSSSCG00000023303/ENSSSCG00000027251/ENSSSCG00000007954/ENSSSCG00000002298/ENSSSCG00000000754/ENSSSCG00000007881	12	ENSSSCG00000024419/ENSSSCG00000008614/ENSSSCG00000006127/ENSSSCG00000005255/ENSSSCG00000037216/ENSSSCG00000027652/ENSSSCG00000000580/ENSSSCG00000016395/ENSSSCG00000007047/ENSSSCG00000025606/ENSSSCG00000010608/ENSSSCG00000012549
BP	GO:0007569	cell aging	15/1419	63/10877	0.0137727919765396	0.423926730712522	ENSSSCG00000006496/ENSSSCG00000031882/ENSSSCG00000008614/ENSSSCG00000011822/ENSSSCG00000010360/ENSSSCG00000012055/ENSSSCG00000005255/ENSSSCG00000025910/ENSSSCG00000001565/ENSSSCG00000011679/ENSSSCG00000007023/ENSSSCG00000010627/ENSSSCG00000010235/ENSSSCG00000025606/ENSSSCG00000010329	LMNA/PNPT1/SMC6/OPA1/BMPR1A/MORC3/SMC5/ZNF277/CDKN1A/ATR/KAT6A/PDCD4/SIRT1/ATM/ZMIZ1	15	2	ENSSSCG00000007023/ENSSSCG00000010329	13	ENSSSCG00000006496/ENSSSCG00000031882/ENSSSCG00000008614/ENSSSCG00000011822/ENSSSCG00000010360/ENSSSCG00000012055/ENSSSCG00000005255/ENSSSCG00000025910/ENSSSCG00000001565/ENSSSCG00000011679/ENSSSCG00000010627/ENSSSCG00000010235/ENSSSCG00000025606
BP	GO:0051238	sequestering of metal ion	15/1419	63/10877	0.0137727919765396	0.423926730712522	ENSSSCG00000035355/ENSSSCG00000040751/ENSSSCG00000016929/ENSSSCG00000009217/ENSSSCG00000004460/ENSSSCG00000037719/ENSSSCG00000031493/ENSSSCG00000009125/ENSSSCG00000001975/ENSSSCG00000040125/ENSSSCG00000011681/ENSSSCG00000006231/ENSSSCG00000015136/ENSSSCG00000004668/ENSSSCG00000006390	F2R/DDIT3/PDE4D/PKD2/IBTK/PDPK1/CYBA/ANK2/PRKD1/NOL3/TRPC1/CHD7/UBASH3B/SLC30A4/CASQ1	15	7	ENSSSCG00000035355/ENSSSCG00000009217/ENSSSCG00000037719/ENSSSCG00000009125/ENSSSCG00000001975/ENSSSCG00000006231/ENSSSCG00000015136	8	ENSSSCG00000040751/ENSSSCG00000016929/ENSSSCG00000004460/ENSSSCG00000031493/ENSSSCG00000040125/ENSSSCG00000011681/ENSSSCG00000004668/ENSSSCG00000006390
BP	GO:0034249	negative regulation of cellular amide metabolic process	23/1419	110/10877	0.0138812049641026	0.423926730712522	ENSSSCG00000012252/ENSSSCG00000016291/ENSSSCG00000011769/ENSSSCG00000010949/ENSSSCG00000038410/ENSSSCG00000006983/ENSSSCG00000010030/ENSSSCG00000028225/ENSSSCG00000034373/ENSSSCG00000012727/ENSSSCG00000000078/ENSSSCG00000015576/ENSSSCG00000028420/ENSSSCG00000016044/ENSSSCG00000015135/ENSSSCG00000008496/ENSSSCG00000022126/ENSSSCG00000003591/ENSSSCG00000011313/ENSSSCG00000017069/ENSSSCG00000016809/…	DDX3X/GIGYF2/FXR1/DAPK1/CPEB2/CNOT7/EIF4ENIF1/DICER1/TNRC6C/FMR1/TNRC6B/TPR/EIF4E/-/SORL1/EIF2AK2/EGFR/PUM1/LIMD1/LARP1/DROSHA/APOE/NCOR1	23	13	ENSSSCG00000016291/ENSSSCG00000010949/ENSSSCG00000010030/ENSSSCG00000028225/ENSSSCG00000034373/ENSSSCG00000000078/ENSSSCG00000015135/ENSSSCG00000022126/ENSSSCG00000003591/ENSSSCG00000011313/ENSSSCG00000017069/ENSSSCG00000016809/ENSSSCG00000018039	10	ENSSSCG00000012252/ENSSSCG00000011769/ENSSSCG00000038410/ENSSSCG00000006983/ENSSSCG00000012727/ENSSSCG00000015576/ENSSSCG00000028420/ENSSSCG00000016044/ENSSSCG00000008496/ENSSSCG00000003088
BP	GO:0035909	aorta morphogenesis	7/1419	21/10877	0.0139788067832844	0.423926730712522	ENSSSCG00000004755/ENSSSCG00000010360/ENSSSCG00000009142/ENSSSCG00000011867/ENSSSCG00000022155/ENSSSCG00000011496/ENSSSCG00000006231	DLL4/BMPR1A/SEC24B/MYLK/RBPJ/ADAMTS9/CHD7	7	4	ENSSSCG00000009142/ENSSSCG00000011867/ENSSSCG00000011496/ENSSSCG00000006231	3	ENSSSCG00000004755/ENSSSCG00000010360/ENSSSCG00000022155
BP	GO:2001222	regulation of neuron migration	7/1419	21/10877	0.0139788067832844	0.423926730712522	ENSSSCG00000010457/ENSSSCG00000016842/ENSSSCG00000015398/ENSSSCG00000014224/ENSSSCG00000004551/ENSSSCG00000034581/ENSSSCG00000005524	KIF20B/NIPBL/SEMA3A/SEMA6A/ZNF609/LRIG2/DAB2IP	7	4	ENSSSCG00000014224/ENSSSCG00000004551/ENSSSCG00000034581/ENSSSCG00000005524	3	ENSSSCG00000010457/ENSSSCG00000016842/ENSSSCG00000015398
BP	GO:0035904	aorta development	10/1419	36/10877	0.0142781299451355	0.427072558016484	ENSSSCG00000004755/ENSSSCG00000009217/ENSSSCG00000010360/ENSSSCG00000009142/ENSSSCG00000034491/ENSSSCG00000011867/ENSSSCG00000040746/ENSSSCG00000022155/ENSSSCG00000011496/ENSSSCG00000006231	DLL4/PKD2/BMPR1A/SEC24B/PRICKLE1/MYLK/LRP2/RBPJ/ADAMTS9/CHD7	10	7	ENSSSCG00000009217/ENSSSCG00000009142/ENSSSCG00000034491/ENSSSCG00000011867/ENSSSCG00000040746/ENSSSCG00000011496/ENSSSCG00000006231	3	ENSSSCG00000004755/ENSSSCG00000010360/ENSSSCG00000022155
BP	GO:0045669	positive regulation of osteoblast differentiation	10/1419	36/10877	0.0142781299451355	0.427072558016484	ENSSSCG00000016916/ENSSSCG00000032566/ENSSSCG00000007520/ENSSSCG00000015874/ENSSSCG00000010360/ENSSSCG00000015485/ENSSSCG00000014319/ENSSSCG00000001975/ENSSSCG00000014256/ENSSSCG00000006051	IL6ST/ZHX3/GNAS/ACVR1/BMPR1A/SUCO/SMAD5/PRKD1/FBN2/CTHRC1	10	5	ENSSSCG00000032566/ENSSSCG00000007520/ENSSSCG00000015874/ENSSSCG00000001975/ENSSSCG00000014256	5	ENSSSCG00000016916/ENSSSCG00000010360/ENSSSCG00000015485/ENSSSCG00000014319/ENSSSCG00000006051
BP	GO:0051052	regulation of DNA metabolic process	47/1419	263/10877	0.0145144210322175	0.430529743904998	ENSSSCG00000023303/ENSSSCG00000010625/ENSSSCG00000021822/ENSSSCG00000038185/ENSSSCG00000006127/ENSSSCG00000003820/ENSSSCG00000027251/ENSSSCG00000007954/ENSSSCG00000024916/ENSSSCG00000008406/ENSSSCG00000012642/ENSSSCG00000009670/ENSSSCG00000023112/ENSSSCG00000011848/ENSSSCG00000005437/ENSSSCG00000012434/ENSSSCG00000008346/ENSSSCG00000017473/ENSSSCG00000027709/ENSSSCG00000001565/ENSSSCG00000037216/…	FIGNL1/SMC3/RNF169/EREG/NBN/USP1/CDC7/SLX4/DHX36/CCDC88A/STAG2/ESCO2/PDS5A/TFRC/KLF4/ATRX/APLF/TOP2A/PARP9/CDKN1A/PPP4R2/MSH6/WAPL/KLHL15/-/ATR/EYA3/RAD52/PIK3CA/CXCL8/ATAD5/ANKRD17/TRIP12/MAP3K4/DNA2/ESCO1/RIF1/EGFR/SMC1A/SIRT1/ATM/TICRR/ERCC4/UBE2B/CXorf57/CIDEA/SLF1	47	15	ENSSSCG00000023303/ENSSSCG00000021822/ENSSSCG00000027251/ENSSSCG00000007954/ENSSSCG00000027709/ENSSSCG00000020931/ENSSSCG00000003580/ENSSSCG00000000754/ENSSSCG00000024592/ENSSSCG00000024373/ENSSSCG00000004037/ENSSSCG00000022126/ENSSSCG00000012325/ENSSSCG00000040355/ENSSSCG00000007881	32	ENSSSCG00000010625/ENSSSCG00000038185/ENSSSCG00000006127/ENSSSCG00000003820/ENSSSCG00000024916/ENSSSCG00000008406/ENSSSCG00000012642/ENSSSCG00000009670/ENSSSCG00000023112/ENSSSCG00000011848/ENSSSCG00000005437/ENSSSCG00000012434/ENSSSCG00000008346/ENSSSCG00000017473/ENSSSCG00000001565/ENSSSCG00000037216/ENSSSCG00000010357/ENSSSCG00000027652/ENSSSCG00000016597/ENSSSCG00000011679/ENSSSCG00000030413/…
BP	GO:0045576	mast cell activation	8/1419	26/10877	0.0146785093732305	0.430529743904998	ENSSSCG00000005385/ENSSSCG00000036828/ENSSSCG00000038735/ENSSSCG00000027074/ENSSSCG00000029615/ENSSSCG00000037719/ENSSSCG00000022820/ENSSSCG00000000634	NR4A3/SNX4/SNAP23/FER/VAMP7/PDPK1/VAMP8/STYK1	8	2	ENSSSCG00000037719/ENSSSCG00000000634	6	ENSSSCG00000005385/ENSSSCG00000036828/ENSSSCG00000038735/ENSSSCG00000027074/ENSSSCG00000029615/ENSSSCG00000022820
BP	GO:0016572	histone phosphorylation	9/1419	31/10877	0.0146894737444114	0.430529743904998	ENSSSCG00000031821/ENSSSCG00000011417/ENSSSCG00000017268/ENSSSCG00000012727/ENSSSCG00000027342/ENSSSCG00000025606/ENSSSCG00000010214/ENSSSCG00000038953/ENSSSCG00000005215	HASPIN/DCAF1/PRKCA/FMR1/BAZ1B/ATM/-/UBE2B/JAK2	9	4	ENSSSCG00000031821/ENSSSCG00000011417/ENSSSCG00000017268/ENSSSCG00000027342	5	ENSSSCG00000012727/ENSSSCG00000025606/ENSSSCG00000010214/ENSSSCG00000038953/ENSSSCG00000005215
BP	GO:0009314	response to radiation	46/1419	257/10877	0.015065775471138	0.431807100349157	ENSSSCG00000003112/ENSSSCG00000005096/ENSSSCG00000023303/ENSSSCG00000003928/ENSSSCG00000003820/ENSSSCG00000008540/ENSSSCG00000034012/ENSSSCG00000015602/ENSSSCG00000021966/ENSSSCG00000035746/ENSSSCG00000023724/ENSSSCG00000015600/ENSSSCG00000026969/ENSSSCG00000035037/ENSSSCG00000001565/ENSSSCG00000016842/ENSSSCG00000020931/ENSSSCG00000009671/ENSSSCG00000009472/ENSSSCG00000011679/ENSSSCG00000003580/…	-/HIF1A/FIGNL1/PLK3/USP1/PPP1CB/CASP3/INTS7/TOPBP1/ECT2/ZBTB1/DTL/KRAS/-/CDKN1A/NIPBL/MSH6/PBK/FBXL3/ATR/EYA3/EGR1/CHEK1/CUL4B/-/TANC1/USP47/KMT2A/MAP3K4/CACNA1F/PRKDC/PER1/EGFR/SMC1A/EEF1D/SIRT1/RPL26/-/ATM/CREBBP/TICRR/EP300/ERCC4/UBE2B/UVSSA/HOXA1	46	18	ENSSSCG00000023303/ENSSSCG00000015602/ENSSSCG00000015600/ENSSSCG00000020931/ENSSSCG00000003580/ENSSSCG00000014336/ENSSSCG00000015880/ENSSSCG00000023324/ENSSSCG00000004037/ENSSSCG00000006274/ENSSSCG00000022126/ENSSSCG00000012325/ENSSSCG00000007951/ENSSSCG00000040355/ENSSSCG00000000068/ENSSSCG00000007881/ENSSSCG00000037035/ENSSSCG00000016707	28	ENSSSCG00000003112/ENSSSCG00000005096/ENSSSCG00000003928/ENSSSCG00000003820/ENSSSCG00000008540/ENSSSCG00000034012/ENSSSCG00000021966/ENSSSCG00000035746/ENSSSCG00000023724/ENSSSCG00000026969/ENSSSCG00000035037/ENSSSCG00000001565/ENSSSCG00000016842/ENSSSCG00000009671/ENSSSCG00000009472/ENSSSCG00000011679/ENSSSCG00000015215/ENSSSCG00000029478/ENSSSCG00000005453/ENSSSCG00000013402/ENSSSCG00000012298/…
BP	GO:0070507	regulation of microtubule cytoskeleton organization	25/1419	123/10877	0.0150805018141365	0.431807100349157	ENSSSCG00000011407/ENSSSCG00000010625/ENSSSCG00000009793/ENSSSCG00000014934/ENSSSCG00000016925/ENSSSCG00000012110/ENSSSCG00000024351/ENSSSCG00000010471/ENSSSCG00000012642/ENSSSCG00000020702/ENSSSCG00000028228/ENSSSCG00000004893/ENSSSCG00000024663/ENSSSCG00000006108/ENSSSCG00000039157/ENSSSCG00000021138/ENSSSCG00000015576/ENSSSCG00000027314/ENSSSCG00000029249/ENSSSCG00000012325/ENSSSCG00000014214/…	RASSF1/SMC3/CLIP1/CHORDC1/PLK2/MID1/MET/KIF11/STAG2/SENP6/XPO1/VPS4B/SPICE1/TMEM67/CLASP1/CEP250/TPR/CAMSAP2/NAV3/SMC1A/TRIM36/RASSF7/GNAI1/CEP120/KIF18A	25	8	ENSSSCG00000016925/ENSSSCG00000012110/ENSSSCG00000024663/ENSSSCG00000039157/ENSSSCG00000021138/ENSSSCG00000027314/ENSSSCG00000029249/ENSSSCG00000012325	17	ENSSSCG00000011407/ENSSSCG00000010625/ENSSSCG00000009793/ENSSSCG00000014934/ENSSSCG00000024351/ENSSSCG00000010471/ENSSSCG00000012642/ENSSSCG00000020702/ENSSSCG00000028228/ENSSSCG00000004893/ENSSSCG00000006108/ENSSSCG00000015576/ENSSSCG00000014214/ENSSSCG00000012854/ENSSSCG00000015407/ENSSSCG00000014239/ENSSSCG00000013332
BP	GO:0007041	lysosomal transport	14/1419	58/10877	0.0151012775283848	0.431807100349157	ENSSSCG00000006206/ENSSSCG00000027509/ENSSSCG00000020858/ENSSSCG00000012742/ENSSSCG00000017877/ENSSSCG00000029615/ENSSSCG00000004893/ENSSSCG00000002740/ENSSSCG00000008138/ENSSSCG00000024232/ENSSSCG00000015135/ENSSSCG00000006151/ENSSSCG00000012519/ENSSSCG00000004032	-/VPS54/KIF13A/MTM1/ANKFY1/VAMP7/VPS4B/AP1G1/GCC2/CCDC91/SORL1/SNX16/GPRASP1/PRKN	14	7	ENSSSCG00000020858/ENSSSCG00000012742/ENSSSCG00000017877/ENSSSCG00000002740/ENSSSCG00000015135/ENSSSCG00000012519/ENSSSCG00000004032	7	ENSSSCG00000006206/ENSSSCG00000027509/ENSSSCG00000029615/ENSSSCG00000004893/ENSSSCG00000008138/ENSSSCG00000024232/ENSSSCG00000006151
BP	GO:0000725	recombinational repair	18/1419	81/10877	0.015189036644792	0.431807100349157	ENSSSCG00000024419/ENSSSCG00000023303/ENSSSCG00000008614/ENSSSCG00000006127/ENSSSCG00000027251/ENSSSCG00000007954/ENSSSCG00000002298/ENSSSCG00000005255/ENSSSCG00000037216/ENSSSCG00000027652/ENSSSCG00000000754/ENSSSCG00000000580/ENSSSCG00000016395/ENSSSCG00000007047/ENSSSCG00000025606/ENSSSCG00000007881/ENSSSCG00000010608/ENSSSCG00000012549	-/FIGNL1/SMC6/NBN/CDC7/SLX4/ZFYVE26/SMC5/PPP4R2/KLHL15/RAD52/RECQL/RIF1/MCM8/ATM/ERCC4/SFR1/CXorf57	18	6	ENSSSCG00000023303/ENSSSCG00000027251/ENSSSCG00000007954/ENSSSCG00000002298/ENSSSCG00000000754/ENSSSCG00000007881	12	ENSSSCG00000024419/ENSSSCG00000008614/ENSSSCG00000006127/ENSSSCG00000005255/ENSSSCG00000037216/ENSSSCG00000027652/ENSSSCG00000000580/ENSSSCG00000016395/ENSSSCG00000007047/ENSSSCG00000025606/ENSSSCG00000010608/ENSSSCG00000012549
BP	GO:0045069	regulation of viral genome replication	12/1419	47/10877	0.0152274544203733	0.431807100349157	ENSSSCG00000012252/ENSSSCG00000017705/ENSSSCG00000006983/ENSSSCG00000017473/ENSSSCG00000008953/ENSSSCG00000012727/ENSSSCG00000014211/ENSSSCG00000008496/ENSSSCG00000013664/ENSSSCG00000017069/ENSSSCG00000004032/ENSSSCG00000010454	DDX3X/CCL5/CNOT7/TOP2A/CXCL8/FMR1/YTHDC2/EIF2AK2/C19orf66/LARP1/PRKN/IFIT5	12	2	ENSSSCG00000017069/ENSSSCG00000004032	10	ENSSSCG00000012252/ENSSSCG00000017705/ENSSSCG00000006983/ENSSSCG00000017473/ENSSSCG00000008953/ENSSSCG00000012727/ENSSSCG00000014211/ENSSSCG00000008496/ENSSSCG00000013664/ENSSSCG00000010454
BP	GO:0045137	development of primary sexual characteristics	22/1419	105/10877	0.0155119318552632	0.437036170399576	ENSSSCG00000038125/ENSSSCG00000011510/ENSSSCG00000005382/ENSSSCG00000027646/ENSSSCG00000012434/ENSSSCG00000012026/ENSSSCG00000039756/ENSSSCG00000004387/ENSSSCG00000028536/ENSSSCG00000015398/ENSSSCG00000035859/ENSSSCG00000014920/ENSSSCG00000005073/ENSSSCG00000040746/ENSSSCG00000010235/ENSSSCG00000025606/ENSSSCG00000024694/ENSSSCG00000032145/ENSSSCG00000002836/ENSSSCG00000039053/ENSSSCG00000013332/…	NUP210L/TMF1/TGFBR1/TIPARP/ATRX/ADAMTS1/FOXC1/FOXO3/LHFPL2/SEMA3A/WNT5A/FZD4/ARID4A/LRP2/SIRT1/ATM/TAF4/IRX5/SALL1/VGF/KIF18A/ZP3	22	10	ENSSSCG00000012026/ENSSSCG00000039756/ENSSSCG00000004387/ENSSSCG00000028536/ENSSSCG00000035859/ENSSSCG00000014920/ENSSSCG00000040746/ENSSSCG00000024694/ENSSSCG00000032145/ENSSSCG00000002836	12	ENSSSCG00000038125/ENSSSCG00000011510/ENSSSCG00000005382/ENSSSCG00000027646/ENSSSCG00000012434/ENSSSCG00000015398/ENSSSCG00000005073/ENSSSCG00000010235/ENSSSCG00000025606/ENSSSCG00000039053/ENSSSCG00000013332/ENSSSCG00000007691
BP	GO:0048638	regulation of developmental growth	34/1419	180/10877	0.015878174506098	0.439279919586874	ENSSSCG00000037910/ENSSSCG00000011680/ENSSSCG00000005382/ENSSSCG00000015590/ENSSSCG00000021597/ENSSSCG00000010360/ENSSSCG00000007153/ENSSSCG00000012742/ENSSSCG00000039756/ENSSSCG00000016842/ENSSSCG00000007056/ENSSSCG00000030820/ENSSSCG00000030413/ENSSSCG00000023165/ENSSSCG00000015398/ENSSSCG00000035859/ENSSSCG00000037449/ENSSSCG00000022155/ENSSSCG00000033171/ENSSSCG00000006231/ENSSSCG00000027130/…	DUSP6/PLS1/TGFBR1/FLVCR1/PHLDA2/BMPR1A/ATRN/MTM1/FOXC1/NIPBL/PLCB1/STK4/PIK3CA/SEMA7A/SEMA3A/WNT5A/CSF1/RBPJ/MAPK11/CHD7/TNFRSF12A/GOLGA4/MACF1/SYT1/PLAC8/WDR36/UNC13A/PRKN/SYT17/CDKL5/CDH4/RAI1/ZP3/EPHA7	34	16	ENSSSCG00000037910/ENSSSCG00000015590/ENSSSCG00000007153/ENSSSCG00000012742/ENSSSCG00000039756/ENSSSCG00000030820/ENSSSCG00000035859/ENSSSCG00000006231/ENSSSCG00000003654/ENSSSCG00000000948/ENSSSCG00000013880/ENSSSCG00000004032/ENSSSCG00000022200/ENSSSCG00000012156/ENSSSCG00000025784/ENSSSCG00000038164	18	ENSSSCG00000011680/ENSSSCG00000005382/ENSSSCG00000021597/ENSSSCG00000010360/ENSSSCG00000016842/ENSSSCG00000007056/ENSSSCG00000030413/ENSSSCG00000023165/ENSSSCG00000015398/ENSSSCG00000037449/ENSSSCG00000022155/ENSSSCG00000033171/ENSSSCG00000027130/ENSSSCG00000011243/ENSSSCG00000009240/ENSSSCG00000014199/ENSSSCG00000007691/ENSSSCG00000004336
BP	GO:0050769	positive regulation of neurogenesis	36/1419	193/10877	0.0161251241517435	0.439279919586874	ENSSSCG00000005096/ENSSSCG00000016916/ENSSSCG00000033228/ENSSSCG00000033025/ENSSSCG00000004339/ENSSSCG00000035746/ENSSSCG00000010457/ENSSSCG00000027410/ENSSSCG00000026268/ENSSSCG00000003107/ENSSSCG00000016842/ENSSSCG00000021206/ENSSSCG00000029615/ENSSSCG00000023165/ENSSSCG00000015398/ENSSSCG00000035859/ENSSSCG00000037449/ENSSSCG00000015985/ENSSSCG00000014224/ENSSSCG00000040746/ENSSSCG00000004551/…	HIF1A/IL6ST/SPAG9/C21orf91/UFL1/ECT2/KIF20B/CBFA2T2/DLG5/ARHGAP35/NIPBL/IL1RAP/VAMP7/SEMA7A/SEMA3A/WNT5A/CSF1/HOXD3/SEMA6A/LRP2/ZNF609/ATOH1/NEURL1/TNFRSF12A/GOLGA4/ADRA2B/MACF1/BNIP2/SYT1/DAB2IP/UNC13A/PRKN/SYT17/CDKL5/APOE/CDH4	36	19	ENSSSCG00000027410/ENSSSCG00000026268/ENSSSCG00000003107/ENSSSCG00000035859/ENSSSCG00000015985/ENSSSCG00000014224/ENSSSCG00000040746/ENSSSCG00000004551/ENSSSCG00000009196/ENSSSCG00000010603/ENSSSCG00000008122/ENSSSCG00000003654/ENSSSCG00000000948/ENSSSCG00000005524/ENSSSCG00000013880/ENSSSCG00000004032/ENSSSCG00000022200/ENSSSCG00000012156/ENSSSCG00000025784	17	ENSSSCG00000005096/ENSSSCG00000016916/ENSSSCG00000033228/ENSSSCG00000033025/ENSSSCG00000004339/ENSSSCG00000035746/ENSSSCG00000010457/ENSSSCG00000016842/ENSSSCG00000021206/ENSSSCG00000029615/ENSSSCG00000023165/ENSSSCG00000015398/ENSSSCG00000037449/ENSSSCG00000027130/ENSSSCG00000011243/ENSSSCG00000004582/ENSSSCG00000003088
BP	GO:0090307	mitotic spindle assembly	11/1419	42/10877	0.0163340381698444	0.439279919586874	ENSSSCG00000010625/ENSSSCG00000010471/ENSSSCG00000012642/ENSSSCG00000004893/ENSSSCG00000024663/ENSSSCG00000017514/ENSSSCG00000024722/ENSSSCG00000015576/ENSSSCG00000027557/ENSSSCG00000010737/ENSSSCG00000012325	SMC3/KIF11/STAG2/VPS4B/SPICE1/KPNB1/PIBF1/TPR/CDC14B/ABRAXAS2/SMC1A	11	5	ENSSSCG00000024663/ENSSSCG00000017514/ENSSSCG00000027557/ENSSSCG00000010737/ENSSSCG00000012325	6	ENSSSCG00000010625/ENSSSCG00000010471/ENSSSCG00000012642/ENSSSCG00000004893/ENSSSCG00000024722/ENSSSCG00000015576
BP	GO:0034250	positive regulation of cellular amide metabolic process	16/1419	70/10877	0.0164684059866295	0.439279919586874	ENSSSCG00000006530/ENSSSCG00000027594/ENSSSCG00000012252/ENSSSCG00000016907/ENSSSCG00000003928/ENSSSCG00000006033/ENSSSCG00000036381/ENSSSCG00000011162/ENSSSCG00000028516/ENSSSCG00000006342/ENSSSCG00000012727/ENSSSCG00000028850/ENSSSCG00000030668/ENSSSCG00000017069/ENSSSCG00000011956/ENSSSCG00000018039	EFNA1/USP16/DDX3X/DHX29/PLK3/EIF3E/RBMS3/LARP4B/LARP4/UHMK1/FMR1/RPL26/UQCC2/LARP1/TRMT10C/NCOR1	16	3	ENSSSCG00000011162/ENSSSCG00000017069/ENSSSCG00000018039	13	ENSSSCG00000006530/ENSSSCG00000027594/ENSSSCG00000012252/ENSSSCG00000016907/ENSSSCG00000003928/ENSSSCG00000006033/ENSSSCG00000036381/ENSSSCG00000028516/ENSSSCG00000006342/ENSSSCG00000012727/ENSSSCG00000028850/ENSSSCG00000030668/ENSSSCG00000011956
BP	GO:0006342	chromatin silencing	13/1419	53/10877	0.0165050128162092	0.439279919586874	ENSSSCG00000009047/ENSSSCG00000008080/ENSSSCG00000031159/ENSSSCG00000015952/ENSSSCG00000030423/ENSSSCG00000004432/ENSSSCG00000016395/ENSSSCG00000036080/ENSSSCG00000008591/ENSSSCG00000001880/ENSSSCG00000010235/ENSSSCG00000003559/ENSSSCG00000038953	SMARCA5/PHF2/BEND3/HAT1/MIER1/HDAC2/RIF1/-/ATAD2B/SIN3A/SIRT1/ARID1A/UBE2B	13	4	ENSSSCG00000008080/ENSSSCG00000031159/ENSSSCG00000001880/ENSSSCG00000003559	9	ENSSSCG00000009047/ENSSSCG00000015952/ENSSSCG00000030423/ENSSSCG00000004432/ENSSSCG00000016395/ENSSSCG00000036080/ENSSSCG00000008591/ENSSSCG00000010235/ENSSSCG00000038953
BP	GO:0042752	regulation of circadian rhythm	13/1419	53/10877	0.0165050128162092	0.439279919586874	ENSSSCG00000008540/ENSSSCG00000010563/ENSSSCG00000024596/ENSSSCG00000035037/ENSSSCG00000017473/ENSSSCG00000009472/ENSSSCG00000000006/ENSSSCG00000006274/ENSSSCG00000017983/ENSSSCG00000001880/ENSSSCG00000023307/ENSSSCG00000004835/ENSSSCG00000004896	PPP1CB/BTRC/NOCT/-/TOP2A/FBXL3/PPARA/PRKDC/PER1/SIN3A/FBXW11/MAGEL2/PHLPP1	13	7	ENSSSCG00000010563/ENSSSCG00000000006/ENSSSCG00000006274/ENSSSCG00000001880/ENSSSCG00000023307/ENSSSCG00000004835/ENSSSCG00000004896	6	ENSSSCG00000008540/ENSSSCG00000024596/ENSSSCG00000035037/ENSSSCG00000017473/ENSSSCG00000009472/ENSSSCG00000017983
BP	GO:0051298	centrosome duplication	13/1419	53/10877	0.0165050128162092	0.439279919586874	ENSSSCG00000014934/ENSSSCG00000016925/ENSSSCG00000009077/ENSSSCG00000028821/ENSSSCG00000028228/ENSSSCG00000004893/ENSSSCG00000024663/ENSSSCG00000017890/ENSSSCG00000006108/ENSSSCG00000022283/ENSSSCG00000014943/ENSSSCG00000023829/ENSSSCG00000014239	CHORDC1/PLK2/HSPA4L/SASS6/XPO1/VPS4B/SPICE1/KIAA0753/TMEM67/CEP135/DEUP1/CCP110/CEP120	13	3	ENSSSCG00000016925/ENSSSCG00000024663/ENSSSCG00000017890	10	ENSSSCG00000014934/ENSSSCG00000009077/ENSSSCG00000028821/ENSSSCG00000028228/ENSSSCG00000004893/ENSSSCG00000006108/ENSSSCG00000022283/ENSSSCG00000014943/ENSSSCG00000023829/ENSSSCG00000014239
BP	GO:0006110	regulation of glycolytic process	6/1419	17/10877	0.016798659622397	0.439279919586874	ENSSSCG00000005096/ENSSSCG00000031888/ENSSSCG00000000006/ENSSSCG00000024777/ENSSSCG00000018039/ENSSSCG00000002648	HIF1A/DDIT4/PPARA/HDAC4/NCOR1/CBFA2T3	6	4	ENSSSCG00000000006/ENSSSCG00000024777/ENSSSCG00000018039/ENSSSCG00000002648	2	ENSSSCG00000005096/ENSSSCG00000031888
BP	GO:0033006	regulation of mast cell activation involved in immune response	6/1419	17/10877	0.016798659622397	0.439279919586874	ENSSSCG00000036828/ENSSSCG00000027074/ENSSSCG00000029615/ENSSSCG00000037719/ENSSSCG00000022820/ENSSSCG00000000634	SNX4/FER/VAMP7/PDPK1/VAMP8/STYK1	6	2	ENSSSCG00000037719/ENSSSCG00000000634	4	ENSSSCG00000036828/ENSSSCG00000027074/ENSSSCG00000029615/ENSSSCG00000022820
BP	GO:0043304	regulation of mast cell degranulation	6/1419	17/10877	0.016798659622397	0.439279919586874	ENSSSCG00000036828/ENSSSCG00000027074/ENSSSCG00000029615/ENSSSCG00000037719/ENSSSCG00000022820/ENSSSCG00000000634	SNX4/FER/VAMP7/PDPK1/VAMP8/STYK1	6	2	ENSSSCG00000037719/ENSSSCG00000000634	4	ENSSSCG00000036828/ENSSSCG00000027074/ENSSSCG00000029615/ENSSSCG00000022820
BP	GO:0060706	cell differentiation involved in embryonic placenta development	6/1419	17/10877	0.016798659622397	0.439279919586874	ENSSSCG00000032613/ENSSSCG00000002254/ENSSSCG00000016140/ENSSSCG00000030820/ENSSSCG00000000252/ENSSSCG00000003585	SNAI1/NR2F2/FZD5/STK4/KRT8/GJB5	6	3	ENSSSCG00000002254/ENSSSCG00000016140/ENSSSCG00000030820	3	ENSSSCG00000032613/ENSSSCG00000000252/ENSSSCG00000003585
BP	GO:2000114	regulation of establishment of cell polarity	6/1419	17/10877	0.016798659622397	0.439279919586874	ENSSSCG00000006201/ENSSSCG00000005235/ENSSSCG00000005240/ENSSSCG00000021893/ENSSSCG00000010457/ENSSSCG00000016853	ARFGEF1/KANK1/DOCK8/ROCK1/KIF20B/RICTOR	6	2	ENSSSCG00000005235/ENSSSCG00000005240	4	ENSSSCG00000006201/ENSSSCG00000021893/ENSSSCG00000010457/ENSSSCG00000016853
BP	GO:0048872	homeostasis of number of cells	33/1419	175/10877	0.0177174998029619	0.452629185623458	ENSSSCG00000005096/ENSSSCG00000035355/ENSSSCG00000016291/ENSSSCG00000034012/ENSSSCG00000005575/ENSSSCG00000005267/ENSSSCG00000027509/ENSSSCG00000015590/ENSSSCG00000026969/ENSSSCG00000004203/ENSSSCG00000017466/ENSSSCG00000031498/ENSSSCG00000011746/ENSSSCG00000004154/ENSSSCG00000014283/ENSSSCG00000004387/ENSSSCG00000007248/ENSSSCG00000040575/ENSSSCG00000009946/ENSSSCG00000023324/ENSSSCG00000014319/…	HIF1A/F2R/GIGYF2/CASP3/RC3H2/ANXA1/VPS54/FLVCR1/KRAS/L3MBTL3/CCR7/PPP2R3C/SKIL/TNFAIP3/KIF3A/FOXO3/ASXL1/ISG15/SART3/KMT2A/SMAD5/CSF1/AFDN/ARID4A/ATPIF1/ACVR1B/ZC3H8/RPS19/FANCC/ADA/PDE4B/SIT1/JAK2	33	11	ENSSSCG00000035355/ENSSSCG00000016291/ENSSSCG00000015590/ENSSSCG00000004203/ENSSSCG00000004387/ENSSSCG00000007248/ENSSSCG00000009946/ENSSSCG00000023324/ENSSSCG00000004018/ENSSSCG00000000233/ENSSSCG00000033654	22	ENSSSCG00000005096/ENSSSCG00000034012/ENSSSCG00000005575/ENSSSCG00000005267/ENSSSCG00000027509/ENSSSCG00000026969/ENSSSCG00000017466/ENSSSCG00000031498/ENSSSCG00000011746/ENSSSCG00000004154/ENSSSCG00000014283/ENSSSCG00000040575/ENSSSCG00000014319/ENSSSCG00000037449/ENSSSCG00000005073/ENSSSCG00000027072/ENSSSCG00000008099/ENSSSCG00000003042/ENSSSCG00000021255/ENSSSCG00000003805/ENSSSCG00000005312/…
BP	GO:0044774	mitotic DNA integrity checkpoint	12/1419	48/10877	0.0179626436624459	0.452629185623458	ENSSSCG00000011213/ENSSSCG00000016291/ENSSSCG00000006127/ENSSSCG00000021966/ENSSSCG00000035639/ENSSSCG00000017473/ENSSSCG00000001565/ENSSSCG00000006274/ENSSSCG00000028850/ENSSSCG00000025606/ENSSSCG00000022774/ENSSSCG00000040355	TOP2B/GIGYF2/NBN/TOPBP1/NAE1/TOP2A/CDKN1A/PRKDC/RPL26/ATM/NOP53/TICRR	12	3	ENSSSCG00000016291/ENSSSCG00000006274/ENSSSCG00000040355	9	ENSSSCG00000011213/ENSSSCG00000006127/ENSSSCG00000021966/ENSSSCG00000035639/ENSSSCG00000017473/ENSSSCG00000001565/ENSSSCG00000028850/ENSSSCG00000025606/ENSSSCG00000022774
BP	GO:0001836	release of cytochrome c from mitochondria	9/1419	32/10877	0.0181337428127668	0.452629185623458	ENSSSCG00000032434/ENSSSCG00000003112/ENSSSCG00000006496/ENSSSCG00000026454/ENSSSCG00000011822/ENSSSCG00000040125/ENSSSCG00000013033/ENSSSCG00000004032/ENSSSCG00000007163	PLAUR/-/LMNA/-/OPA1/NOL3/BAD/PRKN/AVP	9	1	ENSSSCG00000004032	8	ENSSSCG00000032434/ENSSSCG00000003112/ENSSSCG00000006496/ENSSSCG00000026454/ENSSSCG00000011822/ENSSSCG00000040125/ENSSSCG00000013033/ENSSSCG00000007163
BP	GO:0031122	cytoplasmic microtubule organization	9/1419	32/10877	0.0181337428127668	0.452629185623458	ENSSSCG00000003928/ENSSSCG00000006994/ENSSSCG00000010606/ENSSSCG00000008406/ENSSSCG00000017514/ENSSSCG00000039157/ENSSSCG00000002440/ENSSSCG00000014979/ENSSSCG00000014239	PLK3/PCM1/SLK/CCDC88A/KPNB1/CLASP1/-/CEP126/CEP120	9	3	ENSSSCG00000017514/ENSSSCG00000039157/ENSSSCG00000002440	6	ENSSSCG00000003928/ENSSSCG00000006994/ENSSSCG00000010606/ENSSSCG00000008406/ENSSSCG00000014979/ENSSSCG00000014239
BP	GO:0032612	interleukin-1 production	9/1419	32/10877	0.0181337428127668	0.452629185623458	ENSSSCG00000035355/ENSSSCG00000005267/ENSSSCG00000032360/ENSSSCG00000017466/ENSSSCG00000004154/ENSSSCG00000014336/ENSSSCG00000035859/ENSSSCG00000038073/ENSSSCG00000038991	F2R/ANXA1/PANX1/CCR7/TNFAIP3/EGR1/WNT5A/NOD2/S100A13	9	5	ENSSSCG00000035355/ENSSSCG00000032360/ENSSSCG00000014336/ENSSSCG00000035859/ENSSSCG00000038073	4	ENSSSCG00000005267/ENSSSCG00000017466/ENSSSCG00000004154/ENSSSCG00000038991
BP	GO:1900408	negative regulation of cellular response to oxidative stress	9/1419	32/10877	0.0181337428127668	0.452629185623458	ENSSSCG00000005385/ENSSSCG00000005096/ENSSSCG00000004222/ENSSSCG00000024351/ENSSSCG00000006037/ENSSSCG00000027997/ENSSSCG00000010235/ENSSSCG00000040125/ENSSSCG00000004032	NR4A3/HIF1A/NCOA7/MET/OXR1/NME5/SIRT1/NOL3/PRKN	9	1	ENSSSCG00000004032	8	ENSSSCG00000005385/ENSSSCG00000005096/ENSSSCG00000004222/ENSSSCG00000024351/ENSSSCG00000006037/ENSSSCG00000027997/ENSSSCG00000010235/ENSSSCG00000040125
BP	GO:1903202	negative regulation of oxidative stress-induced cell death	9/1419	32/10877	0.0181337428127668	0.452629185623458	ENSSSCG00000005385/ENSSSCG00000005096/ENSSSCG00000004222/ENSSSCG00000024351/ENSSSCG00000006037/ENSSSCG00000027997/ENSSSCG00000010235/ENSSSCG00000040125/ENSSSCG00000004032	NR4A3/HIF1A/NCOA7/MET/OXR1/NME5/SIRT1/NOL3/PRKN	9	1	ENSSSCG00000004032	8	ENSSSCG00000005385/ENSSSCG00000005096/ENSSSCG00000004222/ENSSSCG00000024351/ENSSSCG00000006037/ENSSSCG00000027997/ENSSSCG00000010235/ENSSSCG00000040125
BP	GO:0050865	regulation of cell activation	51/1419	293/10877	0.0181383346654695	0.452629185623458	ENSSSCG00000005385/ENSSSCG00000016916/ENSSSCG00000014277/ENSSSCG00000017705/ENSSSCG00000012713/ENSSSCG00000034012/ENSSSCG00000036828/ENSSSCG00000005240/ENSSSCG00000005267/ENSSSCG00000011848/ENSSSCG00000023724/ENSSSCG00000027074/ENSSSCG00000008346/ENSSSCG00000002917/ENSSSCG00000026268/ENSSSCG00000017466/ENSSSCG00000001565/ENSSSCG00000031498/ENSSSCG00000020931/ENSSSCG00000011081/ENSSSCG00000004154/…	NR4A3/IL6ST/IRF1/CCL5/ATP11C/CASP3/SNX4/DOCK8/ANXA1/TFRC/ZBTB1/FER/APLF/NFKBID/DLG5/CCR7/CDKN1A/PPP2R3C/MSH6/-/TNFAIP3/VAMP7/AP1G1/PDPK1/PRKCA/PIBF1/SLC39A10/ATAD5/WNT5A/RIF1/TMEM131L/EFNB3/NOD2/CYP26B1/LGALS1/ZC3H8/ATM/CD320/BAD/NFATC2/UBASH3B/VAMP8/DROSHA/NRARP/ADA/ADORA2A/APOE/STYK1/ZMIZ1/SIT1/ZP3	51	16	ENSSSCG00000005240/ENSSSCG00000026268/ENSSSCG00000020931/ENSSSCG00000002740/ENSSSCG00000037719/ENSSSCG00000017268/ENSSSCG00000035859/ENSSSCG00000009007/ENSSSCG00000017948/ENSSSCG00000038073/ENSSSCG00000008311/ENSSSCG00000007477/ENSSSCG00000015136/ENSSSCG00000016809/ENSSSCG00000000634/ENSSSCG00000010329	35	ENSSSCG00000005385/ENSSSCG00000016916/ENSSSCG00000014277/ENSSSCG00000017705/ENSSSCG00000012713/ENSSSCG00000034012/ENSSSCG00000036828/ENSSSCG00000005267/ENSSSCG00000011848/ENSSSCG00000023724/ENSSSCG00000027074/ENSSSCG00000008346/ENSSSCG00000002917/ENSSSCG00000017466/ENSSSCG00000001565/ENSSSCG00000031498/ENSSSCG00000011081/ENSSSCG00000004154/ENSSSCG00000029615/ENSSSCG00000024722/ENSSSCG00000031954/…
BP	GO:0061384	heart trabecula morphogenesis	7/1419	22/10877	0.0182460351452136	0.452729747040613	ENSSSCG00000005382/ENSSSCG00000004755/ENSSSCG00000010360/ENSSSCG00000012026/ENSSSCG00000022155/ENSSSCG00000011859/ENSSSCG00000006231	TGFBR1/DLL4/BMPR1A/ADAMTS1/RBPJ/HEG1/CHD7	7	3	ENSSSCG00000012026/ENSSSCG00000011859/ENSSSCG00000006231	4	ENSSSCG00000005382/ENSSSCG00000004755/ENSSSCG00000010360/ENSSSCG00000022155
BP	GO:0001937	negative regulation of endothelial cell proliferation	8/1419	27/10877	0.0185330943798755	0.45725436811817	ENSSSCG00000024168/ENSSSCG00000005382/ENSSSCG00000004755/ENSSSCG00000002254/ENSSSCG00000009434/ENSSSCG00000011739/ENSSSCG00000027072/ENSSSCG00000003088	AIMP1/TGFBR1/DLL4/NR2F2/RGCC/PDCD10/ATPIF1/APOE	8	1	ENSSSCG00000002254	7	ENSSSCG00000024168/ENSSSCG00000005382/ENSSSCG00000004755/ENSSSCG00000009434/ENSSSCG00000011739/ENSSSCG00000027072/ENSSSCG00000003088
BP	GO:0002694	regulation of leukocyte activation	48/1419	274/10877	0.019209010148567	0.460867259752453	ENSSSCG00000005385/ENSSSCG00000016916/ENSSSCG00000014277/ENSSSCG00000017705/ENSSSCG00000012713/ENSSSCG00000034012/ENSSSCG00000036828/ENSSSCG00000005240/ENSSSCG00000005267/ENSSSCG00000011848/ENSSSCG00000023724/ENSSSCG00000027074/ENSSSCG00000008346/ENSSSCG00000002917/ENSSSCG00000026268/ENSSSCG00000017466/ENSSSCG00000001565/ENSSSCG00000031498/ENSSSCG00000020931/ENSSSCG00000011081/ENSSSCG00000004154/…	NR4A3/IL6ST/IRF1/CCL5/ATP11C/CASP3/SNX4/DOCK8/ANXA1/TFRC/ZBTB1/FER/APLF/NFKBID/DLG5/CCR7/CDKN1A/PPP2R3C/MSH6/-/TNFAIP3/VAMP7/AP1G1/PDPK1/PIBF1/SLC39A10/ATAD5/WNT5A/RIF1/TMEM131L/EFNB3/NOD2/CYP26B1/LGALS1/ZC3H8/ATM/CD320/BAD/NFATC2/VAMP8/DROSHA/NRARP/ADA/ADORA2A/STYK1/ZMIZ1/SIT1/ZP3	48	14	ENSSSCG00000005240/ENSSSCG00000026268/ENSSSCG00000020931/ENSSSCG00000002740/ENSSSCG00000037719/ENSSSCG00000035859/ENSSSCG00000009007/ENSSSCG00000017948/ENSSSCG00000038073/ENSSSCG00000008311/ENSSSCG00000007477/ENSSSCG00000016809/ENSSSCG00000000634/ENSSSCG00000010329	34	ENSSSCG00000005385/ENSSSCG00000016916/ENSSSCG00000014277/ENSSSCG00000017705/ENSSSCG00000012713/ENSSSCG00000034012/ENSSSCG00000036828/ENSSSCG00000005267/ENSSSCG00000011848/ENSSSCG00000023724/ENSSSCG00000027074/ENSSSCG00000008346/ENSSSCG00000002917/ENSSSCG00000017466/ENSSSCG00000001565/ENSSSCG00000031498/ENSSSCG00000011081/ENSSSCG00000004154/ENSSSCG00000029615/ENSSSCG00000024722/ENSSSCG00000031954/…
BP	GO:0006140	regulation of nucleotide metabolic process	21/1419	101/10877	0.0192877634578449	0.460867259752453	ENSSSCG00000036893/ENSSSCG00000005096/ENSSSCG00000031888/ENSSSCG00000016929/ENSSSCG00000009217/ENSSSCG00000031159/ENSSSCG00000011760/ENSSSCG00000003576/ENSSSCG00000000006/ENSSSCG00000035859/ENSSSCG00000006302/ENSSSCG00000027072/ENSSSCG00000031733/ENSSSCG00000000033/ENSSSCG00000010235/ENSSSCG00000030668/ENSSSCG00000024777/ENSSSCG00000010054/ENSSSCG00000003088/ENSSSCG00000018039/ENSSSCG00000002648	PTHLH/HIF1A/DDIT4/PDE4D/PKD2/BEND3/TBL1XR1/GPR3/PPARA/WNT5A/GPR161/ATPIF1/AKAP12/TSPO/SIRT1/UQCC2/HDAC4/ADORA2A/APOE/NCOR1/CBFA2T3	21	9	ENSSSCG00000009217/ENSSSCG00000031159/ENSSSCG00000000006/ENSSSCG00000035859/ENSSSCG00000006302/ENSSSCG00000031733/ENSSSCG00000024777/ENSSSCG00000018039/ENSSSCG00000002648	12	ENSSSCG00000036893/ENSSSCG00000005096/ENSSSCG00000031888/ENSSSCG00000016929/ENSSSCG00000011760/ENSSSCG00000003576/ENSSSCG00000027072/ENSSSCG00000000033/ENSSSCG00000010235/ENSSSCG00000030668/ENSSSCG00000010054/ENSSSCG00000003088
BP	GO:0051851	modification by host of symbiont morphology or physiology	11/1419	43/10877	0.0194361785857202	0.460867259752453	ENSSSCG00000012252/ENSSSCG00000010625/ENSSSCG00000017705/ENSSSCG00000000272/ENSSSCG00000038443/ENSSSCG00000012727/ENSSSCG00000014211/ENSSSCG00000014177/ENSSSCG00000000068/ENSSSCG00000004032/ENSSSCG00000003088	DDX3X/SMC3/CCL5/SP1/ZNF639/FMR1/YTHDC2/CHD1/EP300/PRKN/APOE	11	3	ENSSSCG00000000272/ENSSSCG00000000068/ENSSSCG00000004032	8	ENSSSCG00000012252/ENSSSCG00000010625/ENSSSCG00000017705/ENSSSCG00000038443/ENSSSCG00000012727/ENSSSCG00000014211/ENSSSCG00000014177/ENSSSCG00000003088
BP	GO:0055008	cardiac muscle tissue morphogenesis	11/1419	43/10877	0.0194361785857202	0.460867259752453	ENSSSCG00000005382/ENSSSCG00000004755/ENSSSCG00000010360/ENSSSCG00000039756/ENSSSCG00000035859/ENSSSCG00000025334/ENSSSCG00000040746/ENSSSCG00000022155/ENSSSCG00000011859/ENSSSCG00000006231/ENSSSCG00000011441	TGFBR1/DLL4/BMPR1A/FOXC1/WNT5A/POU4F1/LRP2/RBPJ/HEG1/CHD7/TNNC1	11	6	ENSSSCG00000039756/ENSSSCG00000035859/ENSSSCG00000025334/ENSSSCG00000040746/ENSSSCG00000011859/ENSSSCG00000006231	5	ENSSSCG00000005382/ENSSSCG00000004755/ENSSSCG00000010360/ENSSSCG00000022155/ENSSSCG00000011441
BP	GO:0070296	sarcoplasmic reticulum calcium ion transport	5/1419	13/10877	0.0195422484954863	0.460867259752453	ENSSSCG00000016929/ENSSSCG00000009125/ENSSSCG00000040125/ENSSSCG00000006231/ENSSSCG00000006390	PDE4D/ANK2/NOL3/CHD7/CASQ1	5	2	ENSSSCG00000009125/ENSSSCG00000006231	3	ENSSSCG00000016929/ENSSSCG00000040125/ENSSSCG00000006390
BP	GO:1901673	regulation of mitotic spindle assembly	5/1419	13/10877	0.0195422484954863	0.460867259752453	ENSSSCG00000010625/ENSSSCG00000012642/ENSSSCG00000004893/ENSSSCG00000015576/ENSSSCG00000012325	SMC3/STAG2/VPS4B/TPR/SMC1A	5	1	ENSSSCG00000012325	4	ENSSSCG00000010625/ENSSSCG00000012642/ENSSSCG00000004893/ENSSSCG00000015576
BP	GO:1903671	negative regulation of sprouting angiogenesis	5/1419	13/10877	0.0195422484954863	0.460867259752453	ENSSSCG00000009348/ENSSSCG00000004755/ENSSSCG00000005437/ENSSSCG00000011739/ENSSSCG00000011496	STARD13/DLL4/KLF4/PDCD10/ADAMTS9	5	2	ENSSSCG00000009348/ENSSSCG00000011496	3	ENSSSCG00000004755/ENSSSCG00000005437/ENSSSCG00000011739
BP	GO:2000406	positive regulation of T cell migration	5/1419	13/10877	0.0195422484954863	0.460867259752453	ENSSSCG00000004595/ENSSSCG00000017705/ENSSSCG00000016254/ENSSSCG00000005240/ENSSSCG00000035859	ADAM10/CCL5/CCL20/DOCK8/WNT5A	5	2	ENSSSCG00000005240/ENSSSCG00000035859	3	ENSSSCG00000004595/ENSSSCG00000017705/ENSSSCG00000016254
BP	GO:0045786	negative regulation of cell cycle	53/1419	308/10877	0.0199795521923268	0.460867259752453	ENSSSCG00000011407/ENSSSCG00000011213/ENSSSCG00000031882/ENSSSCG00000014277/ENSSSCG00000010625/ENSSSCG00000016291/ENSSSCG00000016346/ENSSSCG00000006127/ENSSSCG00000016925/ENSSSCG00000040751/ENSSSCG00000034012/ENSSSCG00000015602/ENSSSCG00000004466/ENSSSCG00000021966/ENSSSCG00000002254/ENSSSCG00000009434/ENSSSCG00000012642/ENSSSCG00000035639/ENSSSCG00000009217/ENSSSCG00000015600/ENSSSCG00000012434/…	RASSF1/TOP2B/PNPT1/IRF1/SMC3/GIGYF2/MAD2L1BP/NBN/PLK2/DDIT3/CASP3/INTS7/TTK/TOPBP1/NR2F2/RGCC/STAG2/NAE1/PKD2/DTL/ATRX/KNTC1/THAP5/TOP2A/CDKN1A/FOXC1/SKIL/WAPL/TNFAIP3/PTPN3/ATR/UHMK1/CHEK1/CXCL8/TMEM67/NOTCH2/GPR3/HMGN5/USP47/DNA2/TPR/CDC14B/PRKDC/POU4F1/SMC1A/RPL26/ATM/NOP53/TICRR/DAB2IP/MLF1/TCF7L2/GPR132	53	17	ENSSSCG00000016291/ENSSSCG00000016346/ENSSSCG00000016925/ENSSSCG00000015602/ENSSSCG00000002254/ENSSSCG00000009217/ENSSSCG00000015600/ENSSSCG00000039756/ENSSSCG00000005449/ENSSSCG00000006709/ENSSSCG00000027557/ENSSSCG00000006274/ENSSSCG00000025334/ENSSSCG00000012325/ENSSSCG00000040355/ENSSSCG00000005524/ENSSSCG00000010638	36	ENSSSCG00000011407/ENSSSCG00000011213/ENSSSCG00000031882/ENSSSCG00000014277/ENSSSCG00000010625/ENSSSCG00000006127/ENSSSCG00000040751/ENSSSCG00000034012/ENSSSCG00000004466/ENSSSCG00000021966/ENSSSCG00000009434/ENSSSCG00000012642/ENSSSCG00000035639/ENSSSCG00000012434/ENSSSCG00000039546/ENSSSCG00000038158/ENSSSCG00000017473/ENSSSCG00000001565/ENSSSCG00000011746/ENSSSCG00000010357/ENSSSCG00000004154/…
BP	GO:0045727	positive regulation of translation	14/1419	60/10877	0.0201624791291159	0.460867259752453	ENSSSCG00000027594/ENSSSCG00000012252/ENSSSCG00000016907/ENSSSCG00000006033/ENSSSCG00000036381/ENSSSCG00000011162/ENSSSCG00000028516/ENSSSCG00000006342/ENSSSCG00000012727/ENSSSCG00000028850/ENSSSCG00000030668/ENSSSCG00000017069/ENSSSCG00000011956/ENSSSCG00000018039	USP16/DDX3X/DHX29/EIF3E/RBMS3/LARP4B/LARP4/UHMK1/FMR1/RPL26/UQCC2/LARP1/TRMT10C/NCOR1	14	3	ENSSSCG00000011162/ENSSSCG00000017069/ENSSSCG00000018039	11	ENSSSCG00000027594/ENSSSCG00000012252/ENSSSCG00000016907/ENSSSCG00000006033/ENSSSCG00000036381/ENSSSCG00000028516/ENSSSCG00000006342/ENSSSCG00000012727/ENSSSCG00000028850/ENSSSCG00000030668/ENSSSCG00000011956
BP	GO:0071887	leukocyte apoptotic process	14/1419	60/10877	0.0201624791291159	0.460867259752453	ENSSSCG00000006530/ENSSSCG00000005385/ENSSSCG00000003112/ENSSSCG00000005096/ENSSSCG00000017705/ENSSSCG00000005240/ENSSSCG00000005267/ENSSSCG00000002917/ENSSSCG00000031954/ENSSSCG00000035859/ENSSSCG00000008099/ENSSSCG00000010235/ENSSSCG00000037319/ENSSSCG00000021255	EFNA1/NR4A3/-/HIF1A/CCL5/DOCK8/ANXA1/NFKBID/SLC39A10/WNT5A/ZC3H8/SIRT1/PDCD1/ADA	14	2	ENSSSCG00000005240/ENSSSCG00000035859	12	ENSSSCG00000006530/ENSSSCG00000005385/ENSSSCG00000003112/ENSSSCG00000005096/ENSSSCG00000017705/ENSSSCG00000005267/ENSSSCG00000002917/ENSSSCG00000031954/ENSSSCG00000008099/ENSSSCG00000010235/ENSSSCG00000037319/ENSSSCG00000021255
BP	GO:0043903	regulation of symbiosis, encompassing mutualism through parasitism	31/1419	164/10877	0.0203902427109399	0.460867259752453	ENSSSCG00000012252/ENSSSCG00000010625/ENSSSCG00000013125/ENSSSCG00000017705/ENSSSCG00000006983/ENSSSCG00000017473/ENSSSCG00000027709/ENSSSCG00000004893/ENSSSCG00000000272/ENSSSCG00000009055/ENSSSCG00000038443/ENSSSCG00000008953/ENSSSCG00000012727/ENSSSCG00000024592/ENSSSCG00000014211/ENSSSCG00000014177/ENSSSCG00000008496/ENSSSCG00000001880/ENSSSCG00000036568/ENSSSCG00000003591/ENSSSCG00000033854/…	DDX3X/SMC3/OSBP/CCL5/CNOT7/TOP2A/PARP9/VPS4B/SP1/ELMOD2/ZNF639/CXCL8/FMR1/ANKRD17/YTHDC2/CHD1/EIF2AK2/SIN3A/MVB12A/PUM1/LGALS1/C19orf66/BAD/NOP53/EP300/LARP1/RNF216/PRKN/IFIT5/APOE/BPIFA1	31	10	ENSSSCG00000013125/ENSSSCG00000027709/ENSSSCG00000000272/ENSSSCG00000024592/ENSSSCG00000001880/ENSSSCG00000003591/ENSSSCG00000000068/ENSSSCG00000017069/ENSSSCG00000021285/ENSSSCG00000004032	21	ENSSSCG00000012252/ENSSSCG00000010625/ENSSSCG00000017705/ENSSSCG00000006983/ENSSSCG00000017473/ENSSSCG00000004893/ENSSSCG00000009055/ENSSSCG00000038443/ENSSSCG00000008953/ENSSSCG00000012727/ENSSSCG00000014211/ENSSSCG00000014177/ENSSSCG00000008496/ENSSSCG00000036568/ENSSSCG00000033854/ENSSSCG00000013664/ENSSSCG00000013033/ENSSSCG00000022774/ENSSSCG00000010454/ENSSSCG00000003088/ENSSSCG00000007260
BP	GO:0051640	organelle localization	55/1419	322/10877	0.0206455870264689	0.460867259752453	ENSSSCG00000007351/ENSSSCG00000011027/ENSSSCG00000005385/ENSSSCG00000005096/ENSSSCG00000037653/ENSSSCG00000009083/ENSSSCG00000015310/ENSSSCG00000006994/ENSSSCG00000036828/ENSSSCG00000009043/ENSSSCG00000038735/ENSSSCG00000008448/ENSSSCG00000006105/ENSSSCG00000003807/ENSSSCG00000030443/ENSSSCG00000027074/ENSSSCG00000005305/ENSSSCG00000020858/ENSSSCG00000008974/ENSSSCG00000036434/ENSSSCG00000012742/…	FAM83D/KIF5B/NR4A3/HIF1A/RAB5A/SPRY1/AKAP9/PCM1/SNX4/ABCE1/SNAP23/PREPL/GEM/DNAJC6/INTS13/FER/UNC13B/KIF13A/-/TPGS1/MTM1/ANKFY1/KIF1B/VAMP7/XPO1/KIF14/VPS4B/SPICE1/PDPK1/FYCO1/NMD3/PDCD10/KPNB1/PIBF1/CLASP1/CENPE/SEMA6A/STX7/CEP83/CENPF/ATM/NOP53/CENPC/SYT1/VAMP8/-/UNC13A/UBE2B/SYT17/ARHGAP21/CENPQ/CEP120/KIF18A/STYK1/ASIP	55	21	ENSSSCG00000007351/ENSSSCG00000009083/ENSSSCG00000003807/ENSSSCG00000005305/ENSSSCG00000020858/ENSSSCG00000012742/ENSSSCG00000017877/ENSSSCG00000003401/ENSSSCG00000010912/ENSSSCG00000024663/ENSSSCG00000037719/ENSSSCG00000011317/ENSSSCG00000017514/ENSSSCG00000039157/ENSSSCG00000014224/ENSSSCG00000000948/ENSSSCG00000012104/ENSSSCG00000013880/ENSSSCG00000022200/ENSSSCG00000011074/ENSSSCG00000000634	34	ENSSSCG00000011027/ENSSSCG00000005385/ENSSSCG00000005096/ENSSSCG00000037653/ENSSSCG00000015310/ENSSSCG00000006994/ENSSSCG00000036828/ENSSSCG00000009043/ENSSSCG00000038735/ENSSSCG00000008448/ENSSSCG00000006105/ENSSSCG00000030443/ENSSSCG00000027074/ENSSSCG00000008974/ENSSSCG00000036434/ENSSSCG00000029615/ENSSSCG00000028228/ENSSSCG00000004893/ENSSSCG00000022952/ENSSSCG00000011739/ENSSSCG00000024722/…
BP	GO:0051656	establishment of organelle localization	46/1419	262/10877	0.020775140700595	0.460867259752453	ENSSSCG00000007351/ENSSSCG00000011027/ENSSSCG00000005385/ENSSSCG00000005096/ENSSSCG00000037653/ENSSSCG00000009083/ENSSSCG00000036828/ENSSSCG00000009043/ENSSSCG00000038735/ENSSSCG00000008448/ENSSSCG00000006105/ENSSSCG00000003807/ENSSSCG00000027074/ENSSSCG00000005305/ENSSSCG00000020858/ENSSSCG00000008974/ENSSSCG00000003401/ENSSSCG00000029615/ENSSSCG00000028228/ENSSSCG00000010912/ENSSSCG00000004893/…	FAM83D/KIF5B/NR4A3/HIF1A/RAB5A/SPRY1/SNX4/ABCE1/SNAP23/PREPL/GEM/DNAJC6/FER/UNC13B/KIF13A/-/KIF1B/VAMP7/XPO1/KIF14/VPS4B/SPICE1/PDPK1/FYCO1/NMD3/PDCD10/KPNB1/PIBF1/CLASP1/CENPE/CEP83/CENPF/ATM/NOP53/CENPC/SYT1/VAMP8/-/UNC13A/UBE2B/SYT17/ARHGAP21/CENPQ/KIF18A/STYK1/ASIP	46	18	ENSSSCG00000007351/ENSSSCG00000009083/ENSSSCG00000003807/ENSSSCG00000005305/ENSSSCG00000020858/ENSSSCG00000003401/ENSSSCG00000010912/ENSSSCG00000024663/ENSSSCG00000037719/ENSSSCG00000011317/ENSSSCG00000017514/ENSSSCG00000039157/ENSSSCG00000000948/ENSSSCG00000012104/ENSSSCG00000013880/ENSSSCG00000022200/ENSSSCG00000011074/ENSSSCG00000000634	28	ENSSSCG00000011027/ENSSSCG00000005385/ENSSSCG00000005096/ENSSSCG00000037653/ENSSSCG00000036828/ENSSSCG00000009043/ENSSSCG00000038735/ENSSSCG00000008448/ENSSSCG00000006105/ENSSSCG00000027074/ENSSSCG00000008974/ENSSSCG00000029615/ENSSSCG00000028228/ENSSSCG00000004893/ENSSSCG00000022952/ENSSSCG00000011739/ENSSSCG00000024722/ENSSSCG00000023296/ENSSSCG00000024563/ENSSSCG00000015581/ENSSSCG00000025606/…
BP	GO:0010633	negative regulation of epithelial cell migration	10/1419	38/10877	0.0208609815136494	0.460867259752453	ENSSSCG00000009348/ENSSSCG00000004755/ENSSSCG00000002254/ENSSSCG00000009434/ENSSSCG00000005437/ENSSSCG00000011739/ENSSSCG00000015398/ENSSSCG00000011496/ENSSSCG00000005524/ENSSSCG00000003088	STARD13/DLL4/NR2F2/RGCC/KLF4/PDCD10/SEMA3A/ADAMTS9/DAB2IP/APOE	10	4	ENSSSCG00000009348/ENSSSCG00000002254/ENSSSCG00000011496/ENSSSCG00000005524	6	ENSSSCG00000004755/ENSSSCG00000009434/ENSSSCG00000005437/ENSSSCG00000011739/ENSSSCG00000015398/ENSSSCG00000003088
BP	GO:0042254	ribosome biogenesis	35/1419	190/10877	0.0208777199537194	0.460867259752453	ENSSSCG00000006727/ENSSSCG00000012252/ENSSSCG00000016911/ENSSSCG00000022225/ENSSSCG00000009043/ENSSSCG00000008990/ENSSSCG00000008974/ENSSSCG00000001024/ENSSSCG00000034572/ENSSSCG00000021466/ENSSSCG00000028228/ENSSSCG00000022952/ENSSSCG00000025792/ENSSSCG00000002529/ENSSSCG00000026812/ENSSSCG00000031838/ENSSSCG00000004328/ENSSSCG00000033169/ENSSSCG00000001528/ENSSSCG00000010145/ENSSSCG00000020817/…	WDR3/DDX3X/SKIV2L2/NOP58/ABCE1/MRPL1/-/RIOK1/MPHOSPH6/BMT2/XPO1/NMD3/NOA1/RPS21/EMG1/RPS27/MDN1/RPS15/RPS10/HEATR1/RPS16/-/-/RPL35/-/RPL26/NOL8/-/DDX52/NOP53/RPS19/EXOSC4/WDR36/EXOSC8/DIS3L	35	6	ENSSSCG00000006727/ENSSSCG00000001024/ENSSSCG00000025792/ENSSSCG00000004328/ENSSSCG00000010145/ENSSSCG00000004941	29	ENSSSCG00000012252/ENSSSCG00000016911/ENSSSCG00000022225/ENSSSCG00000009043/ENSSSCG00000008990/ENSSSCG00000008974/ENSSSCG00000034572/ENSSSCG00000021466/ENSSSCG00000028228/ENSSSCG00000022952/ENSSSCG00000002529/ENSSSCG00000026812/ENSSSCG00000031838/ENSSSCG00000033169/ENSSSCG00000001528/ENSSSCG00000020817/ENSSSCG00000003930/ENSSSCG00000040273/ENSSSCG00000034227/ENSSSCG00000014910/ENSSSCG00000028850/…
BP	GO:0044257	cellular protein catabolic process	80/1419	493/10877	0.0210488678958998	0.460867259752453	ENSSSCG00000006530/ENSSSCG00000016653/ENSSSCG00000027594/ENSSSCG00000017043/ENSSSCG00000040663/ENSSSCG00000001488/ENSSSCG00000004927/ENSSSCG00000006663/ENSSSCG00000003928/ENSSSCG00000006066/ENSSSCG00000003820/ENSSSCG00000008740/ENSSSCG00000011510/ENSSSCG00000040751/ENSSSCG00000004339/ENSSSCG00000010563/ENSSSCG00000029198/ENSSSCG00000016017/ENSSSCG00000011765/ENSSSCG00000004717/ENSSSCG00000032332/…	EFNA1/DNAJB9/USP16/RNF145/HERPUD1/GCLC/CLPX/OTUD7B/PLK3/RNF19A/USP1/FBXL5/TMF1/DDIT3/UFL1/BTRC/CUL5/DNAJC10/USP13/UBR1/SOCS4/AREL1/UCHL5/DTL/TMTC3/SDF2L1/UBE2H/MTM1/RIC1/RNF111/TNFAIP3/PBK/KLHL15/PRICKLE1/KIF14/VPS4B/SMARCC1/USP8/FBXL3/USP15/TOPORS/TBL1XR1/ISG15/CUL4B/TMEM67/PSMC6/UBXN2B/TRIP12/USP47/SPOPL/CBL/USP27X/PSMA3/USP34/HUWE1/-/ATPIF1/UBR4/-/SVIP/ZNRF3/YOD1/PSMB10/SIRT1/FBXW11/USP25/CTSS…	80	29	ENSSSCG00000017043/ENSSSCG00000001488/ENSSSCG00000006663/ENSSSCG00000008740/ENSSSCG00000010563/ENSSSCG00000011765/ENSSSCG00000002370/ENSSSCG00000015600/ENSSSCG00000016564/ENSSSCG00000012742/ENSSSCG00000005208/ENSSSCG00000004589/ENSSSCG00000034491/ENSSSCG00000010912/ENSSSCG00000011340/ENSSSCG00000006239/ENSSSCG00000024373/ENSSSCG00000015115/ENSSSCG00000012305/ENSSSCG00000012328/ENSSSCG00000003488/…	51	ENSSSCG00000006530/ENSSSCG00000016653/ENSSSCG00000027594/ENSSSCG00000040663/ENSSSCG00000004927/ENSSSCG00000003928/ENSSSCG00000006066/ENSSSCG00000003820/ENSSSCG00000011510/ENSSSCG00000040751/ENSSSCG00000004339/ENSSSCG00000029198/ENSSSCG00000016017/ENSSSCG00000004717/ENSSSCG00000032332/ENSSSCG00000010802/ENSSSCG00000000927/ENSSSCG00000010085/ENSSSCG00000004154/ENSSSCG00000009671/ENSSSCG00000027652/…
BP	GO:0001824	blastocyst development	12/1419	49/10877	0.0210499636112888	0.460867259752453	ENSSSCG00000010922/ENSSSCG00000006127/ENSSSCG00000005382/ENSSSCG00000011746/ENSSSCG00000015215/ENSSSCG00000026812/ENSSSCG00000008587/ENSSSCG00000004582/ENSSSCG00000021255/ENSSSCG00000002144/ENSSSCG00000000552/ENSSSCG00000007691	ELF3/NBN/TGFBR1/SKIL/CHEK1/EMG1/SF3B6/BNIP2/ADA/CCNB1IP1/MED21/ZP3	12	0		12	ENSSSCG00000010922/ENSSSCG00000006127/ENSSSCG00000005382/ENSSSCG00000011746/ENSSSCG00000015215/ENSSSCG00000026812/ENSSSCG00000008587/ENSSSCG00000004582/ENSSSCG00000021255/ENSSSCG00000002144/ENSSSCG00000000552/ENSSSCG00000007691
BP	GO:0034644	cellular response to UV	12/1419	49/10877	0.0210499636112888	0.460867259752453	ENSSSCG00000023724/ENSSSCG00000001565/ENSSSCG00000009671/ENSSSCG00000011679/ENSSSCG00000015215/ENSSSCG00000029478/ENSSSCG00000013402/ENSSSCG00000010235/ENSSSCG00000028850/ENSSSCG00000007951/ENSSSCG00000000068/ENSSSCG00000007881	ZBTB1/CDKN1A/PBK/ATR/CHEK1/CUL4B/USP47/SIRT1/RPL26/CREBBP/EP300/ERCC4	12	3	ENSSSCG00000007951/ENSSSCG00000000068/ENSSSCG00000007881	9	ENSSSCG00000023724/ENSSSCG00000001565/ENSSSCG00000009671/ENSSSCG00000011679/ENSSSCG00000015215/ENSSSCG00000029478/ENSSSCG00000013402/ENSSSCG00000010235/ENSSSCG00000028850
BP	GO:0030111	regulation of Wnt signaling pathway	32/1419	171/10877	0.0213856974527505	0.460867259752453	ENSSSCG00000012252/ENSSSCG00000040751/ENSSSCG00000005235/ENSSSCG00000012361/ENSSSCG00000010563/ENSSSCG00000036381/ENSSSCG00000011733/ENSSSCG00000030957/ENSSSCG00000025028/ENSSSCG00000013174/ENSSSCG00000016140/ENSSSCG00000034491/ENSSSCG00000004387/ENSSSCG00000030820/ENSSSCG00000014336/ENSSSCG00000035859/ENSSSCG00000009474/ENSSSCG00000015507/ENSSSCG00000009007/ENSSSCG00000008382/ENSSSCG00000022155/…	DDX3X/DDIT3/KANK1/AMER1/BTRC/RBMS3/-/NFKB1/-/CTNND1/FZD5/PRICKLE1/FOXO3/STK4/EGR1/WNT5A/SCEL/TNN/TMEM131L/USP34/RBPJ/LIMD1/ZNRF3/FAM53B/DAB2IP/NRARP/RNF146/SALL1/PRKN/APOE/TCF7L2/CTHRC1	32	20	ENSSSCG00000005235/ENSSSCG00000012361/ENSSSCG00000010563/ENSSSCG00000030957/ENSSSCG00000013174/ENSSSCG00000016140/ENSSSCG00000034491/ENSSSCG00000004387/ENSSSCG00000030820/ENSSSCG00000014336/ENSSSCG00000035859/ENSSSCG00000015507/ENSSSCG00000009007/ENSSSCG00000011313/ENSSSCG00000009971/ENSSSCG00000010732/ENSSSCG00000005524/ENSSSCG00000002836/ENSSSCG00000004032/ENSSSCG00000010638	12	ENSSSCG00000012252/ENSSSCG00000040751/ENSSSCG00000036381/ENSSSCG00000011733/ENSSSCG00000025028/ENSSSCG00000009474/ENSSSCG00000008382/ENSSSCG00000022155/ENSSSCG00000005844/ENSSSCG00000004217/ENSSSCG00000003088/ENSSSCG00000006051
BP	GO:0030334	regulation of cell migration	74/1419	452/10877	0.0213930644293207	0.460867259752453	ENSSSCG00000006530/ENSSSCG00000010312/ENSSSCG00000005096/ENSSSCG00000006496/ENSSSCG00000035355/ENSSSCG00000004595/ENSSSCG00000033228/ENSSSCG00000032613/ENSSSCG00000017705/ENSSSCG00000005235/ENSSSCG00000009348/ENSSSCG00000005382/ENSSSCG00000027503/ENSSSCG00000016254/ENSSSCG00000005240/ENSSSCG00000013410/ENSSSCG00000038994/ENSSSCG00000004755/ENSSSCG00000012131/ENSSSCG00000015874/ENSSSCG00000010606/…	EFNA1/PLAU/HIF1A/LMNA/F2R/ADAM10/SPAG9/SNAI1/CCL5/KANK1/STARD13/TGFBR1/OSBPL8/CCL20/DOCK8/SWAP70/CLIC4/DLL4/MOSPD2/ACVR1/SLK/MET/ANXA1/NR2F2/RGCC/PHLDA2/BMPR1A/KLF4/FER/KIF20B/RREB1/DLG5/PTPRJ/CCR7/ANO6/NIPBL/SEMA3C/PLCB1/KIF14/SP1/PDPK1/PDCD10/PRKCA/CXCL8/CLASP1/-/SEMA3A/CCAR1/WNT5A/CSF1/SEMA6A/MYLK/ZNF609/CXCL2/TIAM1/ABHD2/SORL1/ADAMTS9/EGFR/NAV3/ACVR1B/-/DOCK5/SASH1/MACF1/RHOD/LRIG2/DAB2IP/VCL…	74	34	ENSSSCG00000035355/ENSSSCG00000005235/ENSSSCG00000009348/ENSSSCG00000005240/ENSSSCG00000013410/ENSSSCG00000015874/ENSSSCG00000002254/ENSSSCG00000001021/ENSSSCG00000026268/ENSSSCG00000023709/ENSSSCG00000000804/ENSSSCG00000010912/ENSSSCG00000000272/ENSSSCG00000037719/ENSSSCG00000017268/ENSSSCG00000039157/ENSSSCG00000035859/ENSSSCG00000014224/ENSSSCG00000011867/ENSSSCG00000004551/ENSSSCG00000012034/…	40	ENSSSCG00000006530/ENSSSCG00000010312/ENSSSCG00000005096/ENSSSCG00000006496/ENSSSCG00000004595/ENSSSCG00000033228/ENSSSCG00000032613/ENSSSCG00000017705/ENSSSCG00000005382/ENSSSCG00000027503/ENSSSCG00000016254/ENSSSCG00000038994/ENSSSCG00000004755/ENSSSCG00000012131/ENSSSCG00000010606/ENSSSCG00000024351/ENSSSCG00000005267/ENSSSCG00000009434/ENSSSCG00000021597/ENSSSCG00000010360/ENSSSCG00000005437/…
BP	GO:0008406	gonad development	21/1419	102/10877	0.0214010534979496	0.460867259752453	ENSSSCG00000038125/ENSSSCG00000011510/ENSSSCG00000005382/ENSSSCG00000027646/ENSSSCG00000012434/ENSSSCG00000012026/ENSSSCG00000039756/ENSSSCG00000004387/ENSSSCG00000015398/ENSSSCG00000035859/ENSSSCG00000014920/ENSSSCG00000005073/ENSSSCG00000040746/ENSSSCG00000010235/ENSSSCG00000025606/ENSSSCG00000024694/ENSSSCG00000032145/ENSSSCG00000002836/ENSSSCG00000039053/ENSSSCG00000013332/ENSSSCG00000007691	NUP210L/TMF1/TGFBR1/TIPARP/ATRX/ADAMTS1/FOXC1/FOXO3/SEMA3A/WNT5A/FZD4/ARID4A/LRP2/SIRT1/ATM/TAF4/IRX5/SALL1/VGF/KIF18A/ZP3	21	9	ENSSSCG00000012026/ENSSSCG00000039756/ENSSSCG00000004387/ENSSSCG00000035859/ENSSSCG00000014920/ENSSSCG00000040746/ENSSSCG00000024694/ENSSSCG00000032145/ENSSSCG00000002836	12	ENSSSCG00000038125/ENSSSCG00000011510/ENSSSCG00000005382/ENSSSCG00000027646/ENSSSCG00000012434/ENSSSCG00000015398/ENSSSCG00000005073/ENSSSCG00000010235/ENSSSCG00000025606/ENSSSCG00000039053/ENSSSCG00000013332/ENSSSCG00000007691
BP	GO:0009411	response to UV	20/1419	96/10877	0.0215896810065386	0.460867259752453	ENSSSCG00000003820/ENSSSCG00000034012/ENSSSCG00000023724/ENSSSCG00000015600/ENSSSCG00000001565/ENSSSCG00000020931/ENSSSCG00000009671/ENSSSCG00000011679/ENSSSCG00000015215/ENSSSCG00000029478/ENSSSCG00000013402/ENSSSCG00000004037/ENSSSCG00000022126/ENSSSCG00000010235/ENSSSCG00000028850/ENSSSCG00000007951/ENSSSCG00000000068/ENSSSCG00000007881/ENSSSCG00000038953/ENSSSCG00000037035	USP1/CASP3/ZBTB1/DTL/CDKN1A/MSH6/PBK/ATR/CHEK1/CUL4B/USP47/MAP3K4/EGFR/SIRT1/RPL26/CREBBP/EP300/ERCC4/UBE2B/UVSSA	20	8	ENSSSCG00000015600/ENSSSCG00000020931/ENSSSCG00000004037/ENSSSCG00000022126/ENSSSCG00000007951/ENSSSCG00000000068/ENSSSCG00000007881/ENSSSCG00000037035	12	ENSSSCG00000003820/ENSSSCG00000034012/ENSSSCG00000023724/ENSSSCG00000001565/ENSSSCG00000009671/ENSSSCG00000011679/ENSSSCG00000015215/ENSSSCG00000029478/ENSSSCG00000013402/ENSSSCG00000010235/ENSSSCG00000028850/ENSSSCG00000038953
BP	GO:0050679	positive regulation of epithelial cell proliferation	20/1419	96/10877	0.0215896810065386	0.460867259752453	ENSSSCG00000005385/ENSSSCG00000017705/ENSSSCG00000005382/ENSSSCG00000022447/ENSSSCG00000010360/ENSSSCG00000010928/ENSSSCG00000001021/ENSSSCG00000011081/ENSSSCG00000004154/ENSSSCG00000014283/ENSSSCG00000000272/ENSSSCG00000037719/ENSSSCG00000017268/ENSSSCG00000035859/ENSSSCG00000022126/ENSSSCG00000010235/ENSSSCG00000031538/ENSSSCG00000013033/ENSSSCG00000005844/ENSSSCG00000035227	NR4A3/CCL5/TGFBR1/F3/BMPR1A/KDM5B/RREB1/-/TNFAIP3/KIF3A/SP1/PDPK1/PRKCA/WNT5A/EGFR/SIRT1/ANG/BAD/NRARP/ESRP2	20	8	ENSSSCG00000010928/ENSSSCG00000001021/ENSSSCG00000000272/ENSSSCG00000037719/ENSSSCG00000017268/ENSSSCG00000035859/ENSSSCG00000022126/ENSSSCG00000035227	12	ENSSSCG00000005385/ENSSSCG00000017705/ENSSSCG00000005382/ENSSSCG00000022447/ENSSSCG00000010360/ENSSSCG00000011081/ENSSSCG00000004154/ENSSSCG00000014283/ENSSSCG00000010235/ENSSSCG00000031538/ENSSSCG00000013033/ENSSSCG00000005844
BP	GO:0046700	heterocycle catabolic process	36/1419	197/10877	0.0216855428704651	0.460867259752453	ENSSSCG00000006752/ENSSSCG00000024411/ENSSSCG00000016911/ENSSSCG00000031882/ENSSSCG00000008452/ENSSSCG00000006033/ENSSSCG00000016929/ENSSSCG00000006078/ENSSSCG00000021586/ENSSSCG00000024596/ENSSSCG00000006983/ENSSSCG00000028225/ENSSSCG00000021354/ENSSSCG00000034373/ENSSSCG00000014187/ENSSSCG00000026568/ENSSSCG00000012727/ENSSSCG00000010240/ENSSSCG00000000078/ENSSSCG00000030388/ENSSSCG00000011117/…	CSDE1/-/SKIV2L2/PNPT1/LRPPRC/EIF3E/PDE4D/POP1/ZHX2/NOCT/CNOT7/DICER1/CNOT4/TNRC6C/NUDT12/DNPH1/FMR1/DNA2/TNRC6B/UPP1/-/ATM/TATDN1/RNASEH2C/NT5C/LSM3/EXOSC4/EXOSC8/-/DROSHA/ADA/PDE4B/PRODH2/DNASE1L2/CIDEA/DIS3L	36	10	ENSSSCG00000024411/ENSSSCG00000006078/ENSSSCG00000021586/ENSSSCG00000028225/ENSSSCG00000021354/ENSSSCG00000034373/ENSSSCG00000000078/ENSSSCG00000016809/ENSSSCG00000024587/ENSSSCG00000004941	26	ENSSSCG00000006752/ENSSSCG00000016911/ENSSSCG00000031882/ENSSSCG00000008452/ENSSSCG00000006033/ENSSSCG00000016929/ENSSSCG00000024596/ENSSSCG00000006983/ENSSSCG00000014187/ENSSSCG00000026568/ENSSSCG00000012727/ENSSSCG00000010240/ENSSSCG00000030388/ENSSSCG00000011117/ENSSSCG00000025606/ENSSSCG00000030603/ENSSSCG00000012979/ENSSSCG00000028210/ENSSSCG00000011601/ENSSSCG00000005925/ENSSSCG00000009358/…
BP	GO:1902883	negative regulation of response to oxidative stress	9/1419	33/10877	0.0221290314139573	0.460867259752453	ENSSSCG00000005385/ENSSSCG00000005096/ENSSSCG00000004222/ENSSSCG00000024351/ENSSSCG00000006037/ENSSSCG00000027997/ENSSSCG00000010235/ENSSSCG00000040125/ENSSSCG00000004032	NR4A3/HIF1A/NCOA7/MET/OXR1/NME5/SIRT1/NOL3/PRKN	9	1	ENSSSCG00000004032	8	ENSSSCG00000005385/ENSSSCG00000005096/ENSSSCG00000004222/ENSSSCG00000024351/ENSSSCG00000006037/ENSSSCG00000027997/ENSSSCG00000010235/ENSSSCG00000040125
BP	GO:0010639	negative regulation of organelle organization	41/1419	230/10877	0.0221719679474107	0.460867259752453	ENSSSCG00000006775/ENSSSCG00000006496/ENSSSCG00000006201/ENSSSCG00000000798/ENSSSCG00000011853/ENSSSCG00000006127/ENSSSCG00000026294/ENSSSCG00000005235/ENSSSCG00000004466/ENSSSCG00000011822/ENSSSCG00000013410/ENSSSCG00000012110/ENSSSCG00000024351/ENSSSCG00000007954/ENSSSCG00000009434/ENSSSCG00000001973/ENSSSCG00000028113/ENSSSCG00000008080/ENSSSCG00000012434/ENSSSCG00000017473/ENSSSCG00000012742/…	CAPZA1/LMNA/ARFGEF1/TWF1/RUBCN/NBN/GMFB/KANK1/TTK/OPA1/SWAP70/MID1/MET/SLX4/RGCC/SCFD1/CAPZA2/PHF2/ATRX/TOP2A/MTM1/WAPL/TMEM67/CLASP1/TRIP12/TPR/ATAD2B/SIN3A/NAV3/TSPO/SIRT1/NOL3/ATM/JARID2/CAPG/ERCC4/UBE2B/PRKN/CCP110/AVP/GMFG	41	14	ENSSSCG00000011853/ENSSSCG00000005235/ENSSSCG00000013410/ENSSSCG00000012110/ENSSSCG00000007954/ENSSSCG00000008080/ENSSSCG00000012742/ENSSSCG00000039157/ENSSSCG00000024373/ENSSSCG00000001880/ENSSSCG00000029249/ENSSSCG00000001061/ENSSSCG00000007881/ENSSSCG00000004032	27	ENSSSCG00000006775/ENSSSCG00000006496/ENSSSCG00000006201/ENSSSCG00000000798/ENSSSCG00000006127/ENSSSCG00000026294/ENSSSCG00000004466/ENSSSCG00000011822/ENSSSCG00000024351/ENSSSCG00000009434/ENSSSCG00000001973/ENSSSCG00000028113/ENSSSCG00000012434/ENSSSCG00000017473/ENSSSCG00000010357/ENSSSCG00000006108/ENSSSCG00000015576/ENSSSCG00000008591/ENSSSCG00000000033/ENSSSCG00000010235/ENSSSCG00000040125/…
BP	GO:0050792	regulation of viral process	28/1419	146/10877	0.0222549583222753	0.460867259752453	ENSSSCG00000012252/ENSSSCG00000010625/ENSSSCG00000017705/ENSSSCG00000006983/ENSSSCG00000017473/ENSSSCG00000027709/ENSSSCG00000004893/ENSSSCG00000000272/ENSSSCG00000009055/ENSSSCG00000038443/ENSSSCG00000008953/ENSSSCG00000012727/ENSSSCG00000024592/ENSSSCG00000014211/ENSSSCG00000014177/ENSSSCG00000008496/ENSSSCG00000001880/ENSSSCG00000036568/ENSSSCG00000003591/ENSSSCG00000033854/ENSSSCG00000013664/…	DDX3X/SMC3/CCL5/CNOT7/TOP2A/PARP9/VPS4B/SP1/ELMOD2/ZNF639/CXCL8/FMR1/ANKRD17/YTHDC2/CHD1/EIF2AK2/SIN3A/MVB12A/PUM1/LGALS1/C19orf66/NOP53/EP300/LARP1/RNF216/PRKN/IFIT5/APOE	28	9	ENSSSCG00000027709/ENSSSCG00000000272/ENSSSCG00000024592/ENSSSCG00000001880/ENSSSCG00000003591/ENSSSCG00000000068/ENSSSCG00000017069/ENSSSCG00000021285/ENSSSCG00000004032	19	ENSSSCG00000012252/ENSSSCG00000010625/ENSSSCG00000017705/ENSSSCG00000006983/ENSSSCG00000017473/ENSSSCG00000004893/ENSSSCG00000009055/ENSSSCG00000038443/ENSSSCG00000008953/ENSSSCG00000012727/ENSSSCG00000014211/ENSSSCG00000014177/ENSSSCG00000008496/ENSSSCG00000036568/ENSSSCG00000033854/ENSSSCG00000013664/ENSSSCG00000022774/ENSSSCG00000010454/ENSSSCG00000003088
BP	GO:0018205	peptidyl-lysine modification	44/1419	250/10877	0.0224657984935374	0.460867259752453	ENSSSCG00000010224/ENSSSCG00000015288/ENSSSCG00000024253/ENSSSCG00000006646/ENSSSCG00000011689/ENSSSCG00000012434/ENSSSCG00000027115/ENSSSCG00000031159/ENSSSCG00000020702/ENSSSCG00000017310/ENSSSCG00000011081/ENSSSCG00000015952/ENSSSCG00000011004/ENSSSCG00000011917/ENSSSCG00000014336/ENSSSCG00000015215/ENSSSCG00000027211/ENSSSCG00000023324/ENSSSCG00000008292/ENSSSCG00000005073/ENSSSCG00000003700/…	EGR2/RBBP5/CTCF/ARNT/PLOD2/ATRX/-/BEND3/SENP6/KANSL1/-/HAT1/TOPORS/-/EGR1/CHEK1/EPC2/KMT2A/TET3/ARID4A/ESCO1/RIF1/ETFBKMT/NCOA3/KAT6A/SETD5/PER1/TRRAP/SIN3A/YEATS2/SIRT1/EEF1AKMT1/CREBBP/JARID2/EP300/-/EP400/SETD1B/EZH1/HDAC4/-/USPL1/-/HCFC1	44	28	ENSSSCG00000010224/ENSSSCG00000015288/ENSSSCG00000024253/ENSSSCG00000006646/ENSSSCG00000027115/ENSSSCG00000031159/ENSSSCG00000017310/ENSSSCG00000014336/ENSSSCG00000023324/ENSSSCG00000008292/ENSSSCG00000033766/ENSSSCG00000007458/ENSSSCG00000007023/ENSSSCG00000011540/ENSSSCG00000007606/ENSSSCG00000001880/ENSSSCG00000011776/ENSSSCG00000007951/ENSSSCG00000001061/ENSSSCG00000000068/ENSSSCG00000035856/…	16	ENSSSCG00000011689/ENSSSCG00000012434/ENSSSCG00000020702/ENSSSCG00000011081/ENSSSCG00000015952/ENSSSCG00000011004/ENSSSCG00000011917/ENSSSCG00000015215/ENSSSCG00000027211/ENSSSCG00000005073/ENSSSCG00000003700/ENSSSCG00000016395/ENSSSCG00000017983/ENSSSCG00000010235/ENSSSCG00000031468/ENSSSCG00000028065
BP	GO:0016578	histone deubiquitination	6/1419	18/10877	0.0224787557424485	0.460867259752453	ENSSSCG00000027594/ENSSSCG00000000457/ENSSSCG00000007248/ENSSSCG00000009946/ENSSSCG00000012305/ENSSSCG00000007606	USP16/USP15/ASXL1/SART3/USP27X/TRRAP	6	4	ENSSSCG00000007248/ENSSSCG00000009946/ENSSSCG00000012305/ENSSSCG00000007606	2	ENSSSCG00000027594/ENSSSCG00000000457
BP	GO:0034453	microtubule anchoring	6/1419	18/10877	0.0224787557424485	0.460867259752453	ENSSSCG00000006994/ENSSSCG00000014969/ENSSSCG00000014283/ENSSSCG00000008138/ENSSSCG00000039157/ENSSSCG00000015531	PCM1/-/KIF3A/GCC2/CLASP1/CEP350	6	1	ENSSSCG00000039157	5	ENSSSCG00000006994/ENSSSCG00000014969/ENSSSCG00000014283/ENSSSCG00000008138/ENSSSCG00000015531
BP	GO:0043457	regulation of cellular respiration	6/1419	18/10877	0.0224787557424485	0.460867259752453	ENSSSCG00000005096/ENSSSCG00000031882/ENSSSCG00000025792/ENSSSCG00000030413/ENSSSCG00000022774/ENSSSCG00000002648	HIF1A/PNPT1/NOA1/PIK3CA/NOP53/CBFA2T3	6	2	ENSSSCG00000025792/ENSSSCG00000002648	4	ENSSSCG00000005096/ENSSSCG00000031882/ENSSSCG00000030413/ENSSSCG00000022774
BP	GO:0043537	negative regulation of blood vessel endothelial cell migration	6/1419	18/10877	0.0224787557424485	0.460867259752453	ENSSSCG00000009348/ENSSSCG00000004755/ENSSSCG00000009434/ENSSSCG00000005437/ENSSSCG00000011739/ENSSSCG00000003088	STARD13/DLL4/RGCC/KLF4/PDCD10/APOE	6	1	ENSSSCG00000009348	5	ENSSSCG00000004755/ENSSSCG00000009434/ENSSSCG00000005437/ENSSSCG00000011739/ENSSSCG00000003088
BP	GO:0044788	modulation by host of viral process	6/1419	18/10877	0.0224787557424485	0.460867259752453	ENSSSCG00000012252/ENSSSCG00000010625/ENSSSCG00000012727/ENSSSCG00000014211/ENSSSCG00000004032/ENSSSCG00000003088	DDX3X/SMC3/FMR1/YTHDC2/PRKN/APOE	6	1	ENSSSCG00000004032	5	ENSSSCG00000012252/ENSSSCG00000010625/ENSSSCG00000012727/ENSSSCG00000014211/ENSSSCG00000003088
BP	GO:0071470	cellular response to osmotic stress	6/1419	18/10877	0.0224787557424485	0.460867259752453	ENSSSCG00000012252/ENSSSCG00000034012/ENSSSCG00000009217/ENSSSCG00000011867/ENSSSCG00000013033/ENSSSCG00000002243	DDX3X/CASP3/PKD2/MYLK/BAD/SLC12A6	6	3	ENSSSCG00000009217/ENSSSCG00000011867/ENSSSCG00000002243	3	ENSSSCG00000012252/ENSSSCG00000034012/ENSSSCG00000013033
BP	GO:0090169	regulation of spindle assembly	6/1419	18/10877	0.0224787557424485	0.460867259752453	ENSSSCG00000010625/ENSSSCG00000012642/ENSSSCG00000020702/ENSSSCG00000004893/ENSSSCG00000015576/ENSSSCG00000012325	SMC3/STAG2/SENP6/VPS4B/TPR/SMC1A	6	1	ENSSSCG00000012325	5	ENSSSCG00000010625/ENSSSCG00000012642/ENSSSCG00000020702/ENSSSCG00000004893/ENSSSCG00000015576
BP	GO:0032886	regulation of microtubule-based process	27/1419	140/10877	0.022872146463217	0.463293737301673	ENSSSCG00000011407/ENSSSCG00000010625/ENSSSCG00000009793/ENSSSCG00000014934/ENSSSCG00000016925/ENSSSCG00000012110/ENSSSCG00000024351/ENSSSCG00000010471/ENSSSCG00000012642/ENSSSCG00000020702/ENSSSCG00000028228/ENSSSCG00000004893/ENSSSCG00000024663/ENSSSCG00000006108/ENSSSCG00000039157/ENSSSCG00000021138/ENSSSCG00000015576/ENSSSCG00000027314/ENSSSCG00000029249/ENSSSCG00000012325/ENSSSCG00000014214/…	RASSF1/SMC3/CLIP1/CHORDC1/PLK2/MID1/MET/KIF11/STAG2/SENP6/XPO1/VPS4B/SPICE1/TMEM67/CLASP1/CEP250/TPR/CAMSAP2/NAV3/SMC1A/TRIM36/CCDC39/MACF1/RASSF7/GNAI1/CEP120/KIF18A	27	9	ENSSSCG00000016925/ENSSSCG00000012110/ENSSSCG00000024663/ENSSSCG00000039157/ENSSSCG00000021138/ENSSSCG00000027314/ENSSSCG00000029249/ENSSSCG00000012325/ENSSSCG00000003654	18	ENSSSCG00000011407/ENSSSCG00000010625/ENSSSCG00000009793/ENSSSCG00000014934/ENSSSCG00000024351/ENSSSCG00000010471/ENSSSCG00000012642/ENSSSCG00000020702/ENSSSCG00000028228/ENSSSCG00000004893/ENSSSCG00000006108/ENSSSCG00000015576/ENSSSCG00000014214/ENSSSCG00000011768/ENSSSCG00000012854/ENSSSCG00000015407/ENSSSCG00000014239/ENSSSCG00000013332
BP	GO:0032652	regulation of interleukin-1 production	8/1419	28/10877	0.0230600646688086	0.463293737301673	ENSSSCG00000035355/ENSSSCG00000005267/ENSSSCG00000032360/ENSSSCG00000017466/ENSSSCG00000004154/ENSSSCG00000014336/ENSSSCG00000035859/ENSSSCG00000038073	F2R/ANXA1/PANX1/CCR7/TNFAIP3/EGR1/WNT5A/NOD2	8	5	ENSSSCG00000035355/ENSSSCG00000032360/ENSSSCG00000014336/ENSSSCG00000035859/ENSSSCG00000038073	3	ENSSSCG00000005267/ENSSSCG00000017466/ENSSSCG00000004154
BP	GO:1901659	glycosyl compound biosynthetic process	8/1419	28/10877	0.0230600646688086	0.463293737301673	ENSSSCG00000004392/ENSSSCG00000006294/ENSSSCG00000004711/ENSSSCG00000008181/ENSSSCG00000016087/ENSSSCG00000027997/ENSSSCG00000002650/ENSSSCG00000021255	-/NME7/LCMT2/TXNDC9/TYW5/NME5/APRT/ADA	8	1	ENSSSCG00000004711	7	ENSSSCG00000004392/ENSSSCG00000006294/ENSSSCG00000008181/ENSSSCG00000016087/ENSSSCG00000027997/ENSSSCG00000002650/ENSSSCG00000021255
BP	GO:0046660	female sex differentiation	14/1419	61/10877	0.023127555468689	0.463293737301673	ENSSSCG00000027646/ENSSSCG00000012026/ENSSSCG00000039756/ENSSSCG00000004387/ENSSSCG00000028536/ENSSSCG00000035859/ENSSSCG00000014920/ENSSSCG00000040746/ENSSSCG00000010235/ENSSSCG00000025606/ENSSSCG00000006231/ENSSSCG00000024694/ENSSSCG00000039053/ENSSSCG00000007691	TIPARP/ADAMTS1/FOXC1/FOXO3/LHFPL2/WNT5A/FZD4/LRP2/SIRT1/ATM/CHD7/TAF4/VGF/ZP3	14	9	ENSSSCG00000012026/ENSSSCG00000039756/ENSSSCG00000004387/ENSSSCG00000028536/ENSSSCG00000035859/ENSSSCG00000014920/ENSSSCG00000040746/ENSSSCG00000006231/ENSSSCG00000024694	5	ENSSSCG00000027646/ENSSSCG00000010235/ENSSSCG00000025606/ENSSSCG00000039053/ENSSSCG00000007691
BP	GO:0051303	establishment of chromosome localization	14/1419	61/10877	0.023127555468689	0.463293737301673	ENSSSCG00000007351/ENSSSCG00000006105/ENSSSCG00000010912/ENSSSCG00000004893/ENSSSCG00000024663/ENSSSCG00000017514/ENSSSCG00000024722/ENSSSCG00000023296/ENSSSCG00000015581/ENSSSCG00000025606/ENSSSCG00000008921/ENSSSCG00000038953/ENSSSCG00000001731/ENSSSCG00000013332	FAM83D/GEM/KIF14/VPS4B/SPICE1/KPNB1/PIBF1/CENPE/CENPF/ATM/CENPC/UBE2B/CENPQ/KIF18A	14	4	ENSSSCG00000007351/ENSSSCG00000010912/ENSSSCG00000024663/ENSSSCG00000017514	10	ENSSSCG00000006105/ENSSSCG00000004893/ENSSSCG00000024722/ENSSSCG00000023296/ENSSSCG00000015581/ENSSSCG00000025606/ENSSSCG00000008921/ENSSSCG00000038953/ENSSSCG00000001731/ENSSSCG00000013332
BP	GO:0032651	regulation of interleukin-1 beta production	7/1419	23/10877	0.0233502476237795	0.463502415332023	ENSSSCG00000035355/ENSSSCG00000032360/ENSSSCG00000017466/ENSSSCG00000004154/ENSSSCG00000014336/ENSSSCG00000035859/ENSSSCG00000038073	F2R/PANX1/CCR7/TNFAIP3/EGR1/WNT5A/NOD2	7	5	ENSSSCG00000035355/ENSSSCG00000032360/ENSSSCG00000014336/ENSSSCG00000035859/ENSSSCG00000038073	2	ENSSSCG00000017466/ENSSSCG00000004154
BP	GO:0071108	protein K48-linked deubiquitination	7/1419	23/10877	0.0233502476237795	0.463502415332023	ENSSSCG00000006663/ENSSSCG00000004154/ENSSSCG00000004639/ENSSSCG00000012305/ENSSSCG00000008382/ENSSSCG00000015659/ENSSSCG00000024623	OTUD7B/TNFAIP3/USP8/USP27X/USP34/YOD1/USP25	7	2	ENSSSCG00000006663/ENSSSCG00000012305	5	ENSSSCG00000004154/ENSSSCG00000004639/ENSSSCG00000008382/ENSSSCG00000015659/ENSSSCG00000024623
BP	GO:0002687	positive regulation of leukocyte migration	15/1419	67/10877	0.0237192566862477	0.468696805198388	ENSSSCG00000004595/ENSSSCG00000017705/ENSSSCG00000016254/ENSSSCG00000005240/ENSSSCG00000013410/ENSSSCG00000012131/ENSSSCG00000017466/ENSSSCG00000000804/ENSSSCG00000008953/ENSSSCG00000008954/ENSSSCG00000035859/ENSSSCG00000037449/ENSSSCG00000008959/ENSSSCG00000039500/ENSSSCG00000007691	ADAM10/CCL5/CCL20/DOCK8/SWAP70/MOSPD2/CCR7/ANO6/CXCL8/-/WNT5A/CSF1/CXCL2/-/ZP3	15	4	ENSSSCG00000005240/ENSSSCG00000013410/ENSSSCG00000000804/ENSSSCG00000035859	11	ENSSSCG00000004595/ENSSSCG00000017705/ENSSSCG00000016254/ENSSSCG00000012131/ENSSSCG00000017466/ENSSSCG00000008953/ENSSSCG00000008954/ENSSSCG00000037449/ENSSSCG00000008959/ENSSSCG00000039500/ENSSSCG00000007691
BP	GO:0009615	response to virus	31/1419	166/10877	0.0238689024505711	0.469497820083624	ENSSSCG00000012252/ENSSSCG00000014277/ENSSSCG00000017705/ENSSSCG00000031888/ENSSSCG00000015801/ENSSSCG00000024916/ENSSSCG00000006983/ENSSSCG00000015782/ENSSSCG00000027709/ENSSSCG00000009055/ENSSSCG00000014119/ENSSSCG00000040575/ENSSSCG00000017330/ENSSSCG00000012727/ENSSSCG00000027660/ENSSSCG00000024592/ENSSSCG00000010548/ENSSSCG00000033171/ENSSSCG00000008496/ENSSSCG00000001880/ENSSSCG00000003591/…	DDX3X/IRF1/CCL5/DDIT4/TLR3/DHX36/CNOT7/IRF2/PARP9/ELMOD2/SERINC5/ISG15/MAP3K14/FMR1/IFI44L/ANKRD17/CHUK/MAPK11/EIF2AK2/SIN3A/PUM1/C19orf66/MX2/RPS15A/GSDME/BAD/NOP53/EXOSC4/RNF216/IFIT5/BPIFA1	31	9	ENSSSCG00000015782/ENSSSCG00000027709/ENSSSCG00000014119/ENSSSCG00000024592/ENSSSCG00000001880/ENSSSCG00000003591/ENSSSCG00000012076/ENSSSCG00000016716/ENSSSCG00000021285	22	ENSSSCG00000012252/ENSSSCG00000014277/ENSSSCG00000017705/ENSSSCG00000031888/ENSSSCG00000015801/ENSSSCG00000024916/ENSSSCG00000006983/ENSSSCG00000009055/ENSSSCG00000040575/ENSSSCG00000017330/ENSSSCG00000012727/ENSSSCG00000027660/ENSSSCG00000010548/ENSSSCG00000033171/ENSSSCG00000008496/ENSSSCG00000013664/ENSSSCG00000035768/ENSSSCG00000013033/ENSSSCG00000022774/ENSSSCG00000005925/ENSSSCG00000010454/…
BP	GO:0051235	maintenance of location	33/1419	179/10877	0.024079742308378	0.469497820083624	ENSSSCG00000001952/ENSSSCG00000035355/ENSSSCG00000000798/ENSSSCG00000040751/ENSSSCG00000015310/ENSSSCG00000016929/ENSSSCG00000031518/ENSSSCG00000027503/ENSSSCG00000009217/ENSSSCG00000004460/ENSSSCG00000012055/ENSSSCG00000011004/ENSSSCG00000037719/ENSSSCG00000000006/ENSSSCG00000031493/ENSSSCG00000009125/ENSSSCG00000004082/ENSSSCG00000001975/ENSSSCG00000015135/ENSSSCG00000000033/ENSSSCG00000010235/…	NFKBIA/F2R/TWF1/DDIT3/AKAP9/PDE4D/STARD4/OSBPL8/PKD2/IBTK/MORC3/TOPORS/PDPK1/PPARA/CYBA/ANK2/-/PRKD1/SORL1/TSPO/SIRT1/NOL3/TRPC1/ALKBH7/CHD7/UBASH3B/FBN2/SLC30A4/TAF3/ARHGAP21/APOE/CIDEA/CASQ1	33	13	ENSSSCG00000035355/ENSSSCG00000009217/ENSSSCG00000037719/ENSSSCG00000000006/ENSSSCG00000009125/ENSSSCG00000004082/ENSSSCG00000001975/ENSSSCG00000015135/ENSSSCG00000006231/ENSSSCG00000015136/ENSSSCG00000014256/ENSSSCG00000011127/ENSSSCG00000011074	20	ENSSSCG00000001952/ENSSSCG00000000798/ENSSSCG00000040751/ENSSSCG00000015310/ENSSSCG00000016929/ENSSSCG00000031518/ENSSSCG00000027503/ENSSSCG00000004460/ENSSSCG00000012055/ENSSSCG00000011004/ENSSSCG00000031493/ENSSSCG00000000033/ENSSSCG00000010235/ENSSSCG00000040125/ENSSSCG00000011681/ENSSSCG00000024254/ENSSSCG00000004668/ENSSSCG00000003088/ENSSSCG00000024644/ENSSSCG00000006390
BP	GO:0001935	endothelial cell proliferation	16/1419	73/10877	0.0240823246390501	0.469497820083624	ENSSSCG00000024168/ENSSSCG00000005382/ENSSSCG00000004755/ENSSSCG00000002254/ENSSSCG00000022447/ENSSSCG00000009434/ENSSSCG00000000272/ENSSSCG00000037719/ENSSSCG00000011739/ENSSSCG00000017268/ENSSSCG00000035859/ENSSSCG00000027072/ENSSSCG00000010235/ENSSSCG00000031538/ENSSSCG00000005844/ENSSSCG00000003088	AIMP1/TGFBR1/DLL4/NR2F2/F3/RGCC/SP1/PDPK1/PDCD10/PRKCA/WNT5A/ATPIF1/SIRT1/ANG/NRARP/APOE	16	5	ENSSSCG00000002254/ENSSSCG00000000272/ENSSSCG00000037719/ENSSSCG00000017268/ENSSSCG00000035859	11	ENSSSCG00000024168/ENSSSCG00000005382/ENSSSCG00000004755/ENSSSCG00000022447/ENSSSCG00000009434/ENSSSCG00000011739/ENSSSCG00000027072/ENSSSCG00000010235/ENSSSCG00000031538/ENSSSCG00000005844/ENSSSCG00000003088
BP	GO:0044843	cell cycle G1/S phase transition	24/1419	122/10877	0.0246478587497786	0.476341451964498	ENSSSCG00000007351/ENSSSCG00000012252/ENSSSCG00000016291/ENSSSCG00000003928/ENSSSCG00000016925/ENSSSCG00000015874/ENSSSCG00000005267/ENSSSCG00000009434/ENSSSCG00000009217/ENSSSCG00000026959/ENSSSCG00000001565/ENSSSCG00000007056/ENSSSCG00000010912/ENSSSCG00000029478/ENSSSCG00000024592/ENSSSCG00000015273/ENSSSCG00000006274/ENSSSCG00000028420/ENSSSCG00000022126/ENSSSCG00000000233/ENSSSCG00000028850/…	FAM83D/DDX3X/GIGYF2/PLK3/PLK2/ACVR1/ANXA1/RGCC/PKD2/NPAT/CDKN1A/PLCB1/KIF14/CUL4B/ANKRD17/ATP2B4/PRKDC/EIF4E/EGFR/ACVR1B/RPL26/GPR132/CCNE2/BRD4	24	12	ENSSSCG00000007351/ENSSSCG00000016291/ENSSSCG00000016925/ENSSSCG00000015874/ENSSSCG00000009217/ENSSSCG00000010912/ENSSSCG00000024592/ENSSSCG00000015273/ENSSSCG00000006274/ENSSSCG00000022126/ENSSSCG00000000233/ENSSSCG00000022227	12	ENSSSCG00000012252/ENSSSCG00000003928/ENSSSCG00000005267/ENSSSCG00000009434/ENSSSCG00000026959/ENSSSCG00000001565/ENSSSCG00000007056/ENSSSCG00000029478/ENSSSCG00000028420/ENSSSCG00000028850/ENSSSCG00000036892/ENSSSCG00000006095
BP	GO:0090068	positive regulation of cell cycle process	30/1419	160/10877	0.0246515154898045	0.476341451964498	ENSSSCG00000007351/ENSSSCG00000012252/ENSSSCG00000038185/ENSSSCG00000027251/ENSSSCG00000005267/ENSSSCG00000035746/ENSSSCG00000009434/ENSSSCG00000009217/ENSSSCG00000015600/ENSSSCG00000012434/ENSSSCG00000010457/ENSSSCG00000005255/ENSSSCG00000001565/ENSSSCG00000007056/ENSSSCG00000010912/ENSSSCG00000004893/ENSSSCG00000029478/ENSSSCG00000024592/ENSSSCG00000035859/ENSSSCG00000015576/ENSSSCG00000025334/…	FAM83D/DDX3X/EREG/CDC7/ANXA1/ECT2/RGCC/PKD2/DTL/ATRX/KIF20B/SMC5/CDKN1A/PLCB1/KIF14/VPS4B/CUL4B/ANKRD17/WNT5A/TPR/POU4F1/PRKAR2A/SIN3A/RPL26/-/DAB2IP/UBE2B/CEP120/SLF1/BRD4	30	12	ENSSSCG00000007351/ENSSSCG00000027251/ENSSSCG00000009217/ENSSSCG00000015600/ENSSSCG00000010912/ENSSSCG00000024592/ENSSSCG00000035859/ENSSSCG00000025334/ENSSSCG00000011363/ENSSSCG00000001880/ENSSSCG00000005524/ENSSSCG00000022227	18	ENSSSCG00000012252/ENSSSCG00000038185/ENSSSCG00000005267/ENSSSCG00000035746/ENSSSCG00000009434/ENSSSCG00000012434/ENSSSCG00000010457/ENSSSCG00000005255/ENSSSCG00000001565/ENSSSCG00000007056/ENSSSCG00000004893/ENSSSCG00000029478/ENSSSCG00000015576/ENSSSCG00000028850/ENSSSCG00000010214/ENSSSCG00000038953/ENSSSCG00000014239/ENSSSCG00000014163
BP	GO:0006417	regulation of translation	38/1419	212/10877	0.0248392239667723	0.477854145651519	ENSSSCG00000027594/ENSSSCG00000012252/ENSSSCG00000008452/ENSSSCG00000016907/ENSSSCG00000016291/ENSSSCG00000003155/ENSSSCG00000011769/ENSSSCG00000006033/ENSSSCG00000008180/ENSSSCG00000010949/ENSSSCG00000036381/ENSSSCG00000011162/ENSSSCG00000038410/ENSSSCG00000006983/ENSSSCG00000010030/ENSSSCG00000017066/ENSSSCG00000028225/ENSSSCG00000028516/ENSSSCG00000004387/ENSSSCG00000034373/ENSSSCG00000006342/…	USP16/DDX3X/LRPPRC/DHX29/GIGYF2/PPP1R15A/FXR1/EIF3E/EIF5B/DAPK1/RBMS3/LARP4B/CPEB2/CNOT7/EIF4ENIF1/GEMIN5/DICER1/LARP4/FOXO3/TNRC6C/UHMK1/FMR1/TNRC6B/TPR/EIF4E/SECISBP2L/PER1/EIF2AK2/EGFR/PUM1/LIMD1/RPL26/NEURL1/UQCC2/LARP1/DROSHA/TRMT10C/NCOR1	38	16	ENSSSCG00000016291/ENSSSCG00000010949/ENSSSCG00000011162/ENSSSCG00000010030/ENSSSCG00000017066/ENSSSCG00000028225/ENSSSCG00000004387/ENSSSCG00000034373/ENSSSCG00000000078/ENSSSCG00000022126/ENSSSCG00000003591/ENSSSCG00000011313/ENSSSCG00000010603/ENSSSCG00000017069/ENSSSCG00000016809/ENSSSCG00000018039	22	ENSSSCG00000027594/ENSSSCG00000012252/ENSSSCG00000008452/ENSSSCG00000016907/ENSSSCG00000003155/ENSSSCG00000011769/ENSSSCG00000006033/ENSSSCG00000008180/ENSSSCG00000036381/ENSSSCG00000038410/ENSSSCG00000006983/ENSSSCG00000028516/ENSSSCG00000006342/ENSSSCG00000012727/ENSSSCG00000015576/ENSSSCG00000028420/ENSSSCG00000004653/ENSSSCG00000017983/ENSSSCG00000008496/ENSSSCG00000028850/ENSSSCG00000030668/…
BP	GO:0051304	chromosome separation	13/1419	56/10877	0.0256377828827628	0.488848251062095	ENSSSCG00000011213/ENSSSCG00000000693/ENSSSCG00000004466/ENSSSCG00000007954/ENSSSCG00000017308/ENSSSCG00000017473/ENSSSCG00000023296/ENSSSCG00000015576/ENSSSCG00000025606/ENSSSCG00000016068/ENSSSCG00000007881/ENSSSCG00000005000/ENSSSCG00000006912	TOP2B/NCAPD2/TTK/SLX4/CDC27/TOP2A/CENPE/TPR/ATM/HECW2/ERCC4/FANCM/HFM1	13	4	ENSSSCG00000000693/ENSSSCG00000007954/ENSSSCG00000016068/ENSSSCG00000007881	9	ENSSSCG00000011213/ENSSSCG00000004466/ENSSSCG00000017308/ENSSSCG00000017473/ENSSSCG00000023296/ENSSSCG00000015576/ENSSSCG00000025606/ENSSSCG00000005000/ENSSSCG00000006912
BP	GO:2001022	positive regulation of response to DNA damage stimulus	13/1419	56/10877	0.0256377828827628	0.488848251062095	ENSSSCG00000004163/ENSSSCG00000027709/ENSSSCG00000011746/ENSSSCG00000011679/ENSSSCG00000003580/ENSSSCG00000012727/ENSSSCG00000016395/ENSSSCG00000008357/ENSSSCG00000022126/ENSSSCG00000010235/ENSSSCG00000028850/ENSSSCG00000025606/ENSSSCG00000014163	BCLAF1/PARP9/SKIL/ATR/EYA3/FMR1/RIF1/SPRED2/EGFR/SIRT1/RPL26/ATM/SLF1	13	4	ENSSSCG00000027709/ENSSSCG00000003580/ENSSSCG00000008357/ENSSSCG00000022126	9	ENSSSCG00000004163/ENSSSCG00000011746/ENSSSCG00000011679/ENSSSCG00000012727/ENSSSCG00000016395/ENSSSCG00000010235/ENSSSCG00000028850/ENSSSCG00000025606/ENSSSCG00000014163
BP	GO:0044270	cellular nitrogen compound catabolic process	35/1419	193/10877	0.025917740871367	0.488848251062095	ENSSSCG00000006752/ENSSSCG00000024411/ENSSSCG00000016911/ENSSSCG00000031882/ENSSSCG00000008452/ENSSSCG00000006033/ENSSSCG00000016929/ENSSSCG00000006078/ENSSSCG00000021586/ENSSSCG00000024596/ENSSSCG00000006983/ENSSSCG00000028225/ENSSSCG00000021354/ENSSSCG00000034373/ENSSSCG00000014187/ENSSSCG00000026568/ENSSSCG00000012727/ENSSSCG00000010240/ENSSSCG00000000078/ENSSSCG00000030388/ENSSSCG00000011117/…	CSDE1/-/SKIV2L2/PNPT1/LRPPRC/EIF3E/PDE4D/POP1/ZHX2/NOCT/CNOT7/DICER1/CNOT4/TNRC6C/NUDT12/DNPH1/FMR1/DNA2/TNRC6B/UPP1/-/ATM/TATDN1/RNASEH2C/NT5C/LSM3/EXOSC4/EXOSC8/-/DROSHA/ADA/PDE4B/DNASE1L2/CIDEA/DIS3L	35	10	ENSSSCG00000024411/ENSSSCG00000006078/ENSSSCG00000021586/ENSSSCG00000028225/ENSSSCG00000021354/ENSSSCG00000034373/ENSSSCG00000000078/ENSSSCG00000016809/ENSSSCG00000024587/ENSSSCG00000004941	25	ENSSSCG00000006752/ENSSSCG00000016911/ENSSSCG00000031882/ENSSSCG00000008452/ENSSSCG00000006033/ENSSSCG00000016929/ENSSSCG00000024596/ENSSSCG00000006983/ENSSSCG00000014187/ENSSSCG00000026568/ENSSSCG00000012727/ENSSSCG00000010240/ENSSSCG00000030388/ENSSSCG00000011117/ENSSSCG00000025606/ENSSSCG00000030603/ENSSSCG00000012979/ENSSSCG00000028210/ENSSSCG00000011601/ENSSSCG00000005925/ENSSSCG00000009358/…
BP	GO:0050000	chromosome localization	14/1419	62/10877	0.0264061942510004	0.488848251062095	ENSSSCG00000007351/ENSSSCG00000006105/ENSSSCG00000010912/ENSSSCG00000004893/ENSSSCG00000024663/ENSSSCG00000017514/ENSSSCG00000024722/ENSSSCG00000023296/ENSSSCG00000015581/ENSSSCG00000025606/ENSSSCG00000008921/ENSSSCG00000038953/ENSSSCG00000001731/ENSSSCG00000013332	FAM83D/GEM/KIF14/VPS4B/SPICE1/KPNB1/PIBF1/CENPE/CENPF/ATM/CENPC/UBE2B/CENPQ/KIF18A	14	4	ENSSSCG00000007351/ENSSSCG00000010912/ENSSSCG00000024663/ENSSSCG00000017514	10	ENSSSCG00000006105/ENSSSCG00000004893/ENSSSCG00000024722/ENSSSCG00000023296/ENSSSCG00000015581/ENSSSCG00000025606/ENSSSCG00000008921/ENSSSCG00000038953/ENSSSCG00000001731/ENSSSCG00000013332
BP	GO:0009913	epidermal cell differentiation	20/1419	98/10877	0.0265556988780463	0.488848251062095	ENSSSCG00000030165/ENSSSCG00000031262/ENSSSCG00000034012/ENSSSCG00000038994/ENSSSCG00000005267/ENSSSCG00000021893/ENSSSCG00000005437/ENSSSCG00000009142/ENSSSCG00000039756/ENSSSCG00000030820/ENSSSCG00000035859/ENSSSCG00000009474/ENSSSCG00000007458/ENSSSCG00000022155/ENSSSCG00000008311/ENSSSCG00000005124/ENSSSCG00000023280/ENSSSCG00000009196/ENSSSCG00000009079/ENSSSCG00000024587	MAFF/TXNIP/CASP3/CLIC4/ANXA1/ROCK1/KLF4/SEC24B/FOXC1/STK4/WNT5A/SCEL/NCOA3/RBPJ/CYP26B1/IFT74/SULT2B1/ATOH1/INTU/DNASE1L2	20	9	ENSSSCG00000031262/ENSSSCG00000009142/ENSSSCG00000039756/ENSSSCG00000030820/ENSSSCG00000035859/ENSSSCG00000007458/ENSSSCG00000008311/ENSSSCG00000009196/ENSSSCG00000024587	11	ENSSSCG00000030165/ENSSSCG00000034012/ENSSSCG00000038994/ENSSSCG00000005267/ENSSSCG00000021893/ENSSSCG00000005437/ENSSSCG00000009474/ENSSSCG00000022155/ENSSSCG00000005124/ENSSSCG00000023280/ENSSSCG00000009079
BP	GO:0016073	snRNA metabolic process	9/1419	34/10877	0.0267170846706885	0.488848251062095	ENSSSCG00000015602/ENSSSCG00000014168/ENSSSCG00000008990/ENSSSCG00000009384/ENSSSCG00000005097/ENSSSCG00000008099/ENSSSCG00000004577/ENSSSCG00000005925/ENSSSCG00000009358	INTS7/ELL2/MRPL1/INTS6/SNAPC1/ZC3H8/ICE2/EXOSC4/EXOSC8	9	1	ENSSSCG00000015602	8	ENSSSCG00000014168/ENSSSCG00000008990/ENSSSCG00000009384/ENSSSCG00000005097/ENSSSCG00000008099/ENSSSCG00000004577/ENSSSCG00000005925/ENSSSCG00000009358
BP	GO:0043299	leukocyte degranulation	9/1419	34/10877	0.0267170846706885	0.488848251062095	ENSSSCG00000005385/ENSSSCG00000036828/ENSSSCG00000038735/ENSSSCG00000027074/ENSSSCG00000029615/ENSSSCG00000002740/ENSSSCG00000037719/ENSSSCG00000022820/ENSSSCG00000000634	NR4A3/SNX4/SNAP23/FER/VAMP7/AP1G1/PDPK1/VAMP8/STYK1	9	3	ENSSSCG00000002740/ENSSSCG00000037719/ENSSSCG00000000634	6	ENSSSCG00000005385/ENSSSCG00000036828/ENSSSCG00000038735/ENSSSCG00000027074/ENSSSCG00000029615/ENSSSCG00000022820
BP	GO:0050879	multicellular organismal movement	9/1419	34/10877	0.0267170846706885	0.488848251062095	ENSSSCG00000039947/ENSSSCG00000016291/ENSSSCG00000027509/ENSSSCG00000033260/ENSSSCG00000007424/ENSSSCG00000011441/ENSSSCG00000026733/ENSSSCG00000035223/ENSSSCG00000006390	KCNJ2/GIGYF2/VPS54/TNNI2/TNNC2/TNNC1/HIPK2/SYNM/CASQ1	9	5	ENSSSCG00000039947/ENSSSCG00000016291/ENSSSCG00000007424/ENSSSCG00000026733/ENSSSCG00000035223	4	ENSSSCG00000027509/ENSSSCG00000033260/ENSSSCG00000011441/ENSSSCG00000006390
BP	GO:0050881	musculoskeletal movement	9/1419	34/10877	0.0267170846706885	0.488848251062095	ENSSSCG00000039947/ENSSSCG00000016291/ENSSSCG00000027509/ENSSSCG00000033260/ENSSSCG00000007424/ENSSSCG00000011441/ENSSSCG00000026733/ENSSSCG00000035223/ENSSSCG00000006390	KCNJ2/GIGYF2/VPS54/TNNI2/TNNC2/TNNC1/HIPK2/SYNM/CASQ1	9	5	ENSSSCG00000039947/ENSSSCG00000016291/ENSSSCG00000007424/ENSSSCG00000026733/ENSSSCG00000035223	4	ENSSSCG00000027509/ENSSSCG00000033260/ENSSSCG00000011441/ENSSSCG00000006390
BP	GO:0045667	regulation of osteoblast differentiation	15/1419	68/10877	0.0268859100288631	0.488848251062095	ENSSSCG00000016916/ENSSSCG00000032566/ENSSSCG00000002344/ENSSSCG00000007520/ENSSSCG00000015874/ENSSSCG00000024596/ENSSSCG00000010360/ENSSSCG00000015485/ENSSSCG00000014319/ENSSSCG00000015507/ENSSSCG00000001975/ENSSSCG00000011313/ENSSSCG00000014256/ENSSSCG00000024777/ENSSSCG00000006051	IL6ST/ZHX3/RIOX1/GNAS/ACVR1/NOCT/BMPR1A/SUCO/SMAD5/TNN/PRKD1/LIMD1/FBN2/HDAC4/CTHRC1	15	9	ENSSSCG00000032566/ENSSSCG00000002344/ENSSSCG00000007520/ENSSSCG00000015874/ENSSSCG00000015507/ENSSSCG00000001975/ENSSSCG00000011313/ENSSSCG00000014256/ENSSSCG00000024777	6	ENSSSCG00000016916/ENSSSCG00000024596/ENSSSCG00000010360/ENSSSCG00000015485/ENSSSCG00000014319/ENSSSCG00000006051
BP	GO:0010522	regulation of calcium ion transport into cytosol	11/1419	45/10877	0.0269127222822511	0.488848251062095	ENSSSCG00000035355/ENSSSCG00000016929/ENSSSCG00000009217/ENSSSCG00000037719/ENSSSCG00000031493/ENSSSCG00000009125/ENSSSCG00000001975/ENSSSCG00000011681/ENSSSCG00000006231/ENSSSCG00000015136/ENSSSCG00000006390	F2R/PDE4D/PKD2/PDPK1/CYBA/ANK2/PRKD1/TRPC1/CHD7/UBASH3B/CASQ1	11	7	ENSSSCG00000035355/ENSSSCG00000009217/ENSSSCG00000037719/ENSSSCG00000009125/ENSSSCG00000001975/ENSSSCG00000006231/ENSSSCG00000015136	4	ENSSSCG00000016929/ENSSSCG00000031493/ENSSSCG00000011681/ENSSSCG00000006390
BP	GO:0060968	regulation of gene silencing	11/1419	45/10877	0.0269127222822511	0.488848251062095	ENSSSCG00000011769/ENSSSCG00000008080/ENSSSCG00000012727/ENSSSCG00000030423/ENSSSCG00000008591/ENSSSCG00000022126/ENSSSCG00000001880/ENSSSCG00000003591/ENSSSCG00000011313/ENSSSCG00000010235/ENSSSCG00000018039	FXR1/PHF2/FMR1/MIER1/ATAD2B/EGFR/SIN3A/PUM1/LIMD1/SIRT1/NCOR1	11	6	ENSSSCG00000008080/ENSSSCG00000022126/ENSSSCG00000001880/ENSSSCG00000003591/ENSSSCG00000011313/ENSSSCG00000018039	5	ENSSSCG00000011769/ENSSSCG00000012727/ENSSSCG00000030423/ENSSSCG00000008591/ENSSSCG00000010235
BP	GO:0006275	regulation of DNA replication	16/1419	74/10877	0.02713176845984	0.488848251062095	ENSSSCG00000010625/ENSSSCG00000038185/ENSSSCG00000027251/ENSSSCG00000008406/ENSSSCG00000012642/ENSSSCG00000009670/ENSSSCG00000023112/ENSSSCG00000012434/ENSSSCG00000010357/ENSSSCG00000011679/ENSSSCG00000024592/ENSSSCG00000010240/ENSSSCG00000003700/ENSSSCG00000022126/ENSSSCG00000012325/ENSSSCG00000040355	SMC3/EREG/CDC7/CCDC88A/STAG2/ESCO2/PDS5A/ATRX/WAPL/ATR/ANKRD17/DNA2/ESCO1/EGFR/SMC1A/TICRR	16	5	ENSSSCG00000027251/ENSSSCG00000024592/ENSSSCG00000022126/ENSSSCG00000012325/ENSSSCG00000040355	11	ENSSSCG00000010625/ENSSSCG00000038185/ENSSSCG00000008406/ENSSSCG00000012642/ENSSSCG00000009670/ENSSSCG00000023112/ENSSSCG00000012434/ENSSSCG00000010357/ENSSSCG00000011679/ENSSSCG00000010240/ENSSSCG00000003700
BP	GO:0006338	chromatin remodeling	17/1419	80/10877	0.0271884710613411	0.488848251062095	ENSSSCG00000009047/ENSSSCG00000023724/ENSSSCG00000001958/ENSSSCG00000012434/ENSSSCG00000011340/ENSSSCG00000015215/ENSSSCG00000012649/ENSSSCG00000004432/ENSSSCG00000015576/ENSSSCG00000027342/ENSSSCG00000014177/ENSSSCG00000006231/ENSSSCG00000003559/ENSSSCG00000006562/ENSSSCG00000024777/ENSSSCG00000025682/ENSSSCG00000033497	SMARCA5/ZBTB1/BAZ1A/ATRX/SMARCC1/CHEK1/SMARCA1/HDAC2/TPR/BAZ1B/CHD1/CHD7/ARID1A/GATAD2B/HDAC4/ACTR6/RERE	17	7	ENSSSCG00000011340/ENSSSCG00000027342/ENSSSCG00000006231/ENSSSCG00000003559/ENSSSCG00000006562/ENSSSCG00000024777/ENSSSCG00000033497	10	ENSSSCG00000009047/ENSSSCG00000023724/ENSSSCG00000001958/ENSSSCG00000012434/ENSSSCG00000015215/ENSSSCG00000012649/ENSSSCG00000004432/ENSSSCG00000015576/ENSSSCG00000014177/ENSSSCG00000025682
BP	GO:0007034	vacuolar transport	17/1419	80/10877	0.0271884710613411	0.488848251062095	ENSSSCG00000006206/ENSSSCG00000027509/ENSSSCG00000020858/ENSSSCG00000012742/ENSSSCG00000017877/ENSSSCG00000010995/ENSSSCG00000029615/ENSSSCG00000004893/ENSSSCG00000002740/ENSSSCG00000029094/ENSSSCG00000008138/ENSSSCG00000024232/ENSSSCG00000015135/ENSSSCG00000006151/ENSSSCG00000006138/ENSSSCG00000012519/ENSSSCG00000004032	-/VPS54/KIF13A/MTM1/ANKFY1/CHMP5/VAMP7/VPS4B/AP1G1/PIK3R4/GCC2/CCDC91/SORL1/SNX16/ATP6V0D2/GPRASP1/PRKN	17	8	ENSSSCG00000020858/ENSSSCG00000012742/ENSSSCG00000017877/ENSSSCG00000002740/ENSSSCG00000029094/ENSSSCG00000015135/ENSSSCG00000012519/ENSSSCG00000004032	9	ENSSSCG00000006206/ENSSSCG00000027509/ENSSSCG00000010995/ENSSSCG00000029615/ENSSSCG00000004893/ENSSSCG00000008138/ENSSSCG00000024232/ENSSSCG00000006151/ENSSSCG00000006138
BP	GO:0051383	kinetochore organization	5/1419	14/10877	0.0272017689507875	0.488848251062095	ENSSSCG00000005403/ENSSSCG00000011731/ENSSSCG00000020702/ENSSSCG00000006622/ENSSSCG00000008921	SMC2/SMC4/SENP6/POGZ/CENPC	5	1	ENSSSCG00000006622	4	ENSSSCG00000005403/ENSSSCG00000011731/ENSSSCG00000020702/ENSSSCG00000008921
BP	GO:0050767	regulation of neurogenesis	62/1419	375/10877	0.0275855200830972	0.489003799616065	ENSSSCG00000006530/ENSSSCG00000005096/ENSSSCG00000016916/ENSSSCG00000033228/ENSSSCG00000033025/ENSSSCG00000004339/ENSSSCG00000005235/ENSSSCG00000006994/ENSSSCG00000004755/ENSSSCG00000035746/ENSSSCG00000008406/ENSSSCG00000021586/ENSSSCG00000010030/ENSSSCG00000010360/ENSSSCG00000005437/ENSSSCG00000010457/ENSSSCG00000027410/ENSSSCG00000026268/ENSSSCG00000003107/ENSSSCG00000016842/ENSSSCG00000021206/…	EFNA1/HIF1A/IL6ST/SPAG9/C21orf91/UFL1/KANK1/PCM1/DLL4/ECT2/CCDC88A/ZHX2/EIF4ENIF1/BMPR1A/KLF4/KIF20B/CBFA2T2/DLG5/ARHGAP35/NIPBL/IL1RAP/VAMP7/KIF13B/SSH1/FMR1/SEMA7A/SEMA3A/WNT5A/CSF1/HOXD3/SEMA6A/AFDN/EIF4E/POU4F1/CAMSAP2/LRP2/ZNF609/EFNB3/SORL1/ATOH1/NEURL1/SIPA1L1/CHD7/TNFRSF12A/GOLGA4/ADRA2B/MACF1/BNIP2/SYT1/LRIG2/WDR36/DAB2IP/UNC13A/PRKN/SYT17/ASAP1/CDKL5/APOE/CDH4/ISL2/ZNF536/EPHA7	62	35	ENSSSCG00000005235/ENSSSCG00000021586/ENSSSCG00000010030/ENSSSCG00000027410/ENSSSCG00000026268/ENSSSCG00000003107/ENSSSCG00000009683/ENSSSCG00000009943/ENSSSCG00000035859/ENSSSCG00000015985/ENSSSCG00000014224/ENSSSCG00000004018/ENSSSCG00000025334/ENSSSCG00000027314/ENSSSCG00000040746/ENSSSCG00000004551/ENSSSCG00000017948/ENSSSCG00000015135/ENSSSCG00000009196/ENSSSCG00000010603/ENSSSCG00000002332/…	27	ENSSSCG00000006530/ENSSSCG00000005096/ENSSSCG00000016916/ENSSSCG00000033228/ENSSSCG00000033025/ENSSSCG00000004339/ENSSSCG00000006994/ENSSSCG00000004755/ENSSSCG00000035746/ENSSSCG00000008406/ENSSSCG00000010360/ENSSSCG00000005437/ENSSSCG00000010457/ENSSSCG00000016842/ENSSSCG00000021206/ENSSSCG00000029615/ENSSSCG00000012727/ENSSSCG00000023165/ENSSSCG00000015398/ENSSSCG00000037449/ENSSSCG00000028420/…
BP	GO:1902115	regulation of organelle assembly	23/1419	117/10877	0.0276213784682292	0.489003799616065	ENSSSCG00000010625/ENSSSCG00000016925/ENSSSCG00000009994/ENSSSCG00000008406/ENSSSCG00000012642/ENSSSCG00000001973/ENSSSCG00000004601/ENSSSCG00000020702/ENSSSCG00000014946/ENSSSCG00000003107/ENSSSCG00000012742/ENSSSCG00000004893/ENSSSCG00000024663/ENSSSCG00000038383/ENSSSCG00000033291/ENSSSCG00000015576/ENSSSCG00000022283/ENSSSCG00000012325/ENSSSCG00000028759/ENSSSCG00000023829/ENSSSCG00000014239/…	SMC3/PLK2/MTMR3/CCDC88A/STAG2/SCFD1/MNS1/SENP6/CEP295/ARHGAP35/MTM1/VPS4B/SPICE1/DYNC2LI1/PIP4K2B/TPR/CEP135/SMC1A/ASAP1/CCP110/CEP120/C9orf72/ATXN2	23	9	ENSSSCG00000016925/ENSSSCG00000009994/ENSSSCG00000003107/ENSSSCG00000012742/ENSSSCG00000024663/ENSSSCG00000033291/ENSSSCG00000012325/ENSSSCG00000028759/ENSSSCG00000009834	14	ENSSSCG00000010625/ENSSSCG00000008406/ENSSSCG00000012642/ENSSSCG00000001973/ENSSSCG00000004601/ENSSSCG00000020702/ENSSSCG00000014946/ENSSSCG00000004893/ENSSSCG00000038383/ENSSSCG00000015576/ENSSSCG00000022283/ENSSSCG00000023829/ENSSSCG00000014239/ENSSSCG00000011010
BP	GO:0006260	DNA replication	31/1419	168/10877	0.0277952419403728	0.489003799616065	ENSSSCG00000010625/ENSSSCG00000038185/ENSSSCG00000027251/ENSSSCG00000008788/ENSSSCG00000025703/ENSSSCG00000021966/ENSSSCG00000007954/ENSSSCG00000008406/ENSSSCG00000012642/ENSSSCG00000009670/ENSSSCG00000023112/ENSSSCG00000001958/ENSSSCG00000012434/ENSSSCG00000026055/ENSSSCG00000010357/ENSSSCG00000011679/ENSSSCG00000005008/ENSSSCG00000024592/ENSSSCG00000010240/ENSSSCG00000003700/ENSSSCG00000015668/…	SMC3/EREG/CDC7/RFC1/REV3L/TOPBP1/SLX4/CCDC88A/STAG2/ESCO2/PDS5A/BAZ1A/ATRX/PRIM1/WAPL/ATR/POLE2/ANKRD17/DNA2/ESCO1/ORC4/POLA1/EGFR/SIN3A/-/SMC1A/MCM8/TICRR/FANCM/RRM2B/CCNE2	31	8	ENSSSCG00000027251/ENSSSCG00000007954/ENSSSCG00000024592/ENSSSCG00000022240/ENSSSCG00000022126/ENSSSCG00000001880/ENSSSCG00000012325/ENSSSCG00000040355	23	ENSSSCG00000010625/ENSSSCG00000038185/ENSSSCG00000008788/ENSSSCG00000025703/ENSSSCG00000021966/ENSSSCG00000008406/ENSSSCG00000012642/ENSSSCG00000009670/ENSSSCG00000023112/ENSSSCG00000001958/ENSSSCG00000012434/ENSSSCG00000026055/ENSSSCG00000010357/ENSSSCG00000011679/ENSSSCG00000005008/ENSSSCG00000010240/ENSSSCG00000003700/ENSSSCG00000015668/ENSSSCG00000023886/ENSSSCG00000007047/ENSSSCG00000005000/…
BP	GO:0051962	positive regulation of nervous system development	40/1419	227/10877	0.027998448134149	0.489003799616065	ENSSSCG00000005096/ENSSSCG00000016916/ENSSSCG00000033228/ENSSSCG00000033025/ENSSSCG00000004339/ENSSSCG00000035746/ENSSSCG00000010457/ENSSSCG00000027410/ENSSSCG00000026268/ENSSSCG00000003107/ENSSSCG00000016842/ENSSSCG00000021206/ENSSSCG00000029615/ENSSSCG00000023165/ENSSSCG00000015398/ENSSSCG00000035859/ENSSSCG00000037449/ENSSSCG00000015985/ENSSSCG00000014224/ENSSSCG00000040746/ENSSSCG00000004551/…	HIF1A/IL6ST/SPAG9/C21orf91/UFL1/ECT2/KIF20B/CBFA2T2/DLG5/ARHGAP35/NIPBL/IL1RAP/VAMP7/SEMA7A/SEMA3A/WNT5A/CSF1/HOXD3/SEMA6A/LRP2/ZNF609/ATOH1/NEURL1/ADGRL3/TNFRSF12A/GOLGA4/ADRA2B/MACF1/BNIP2/SYT1/SLITRK3/DAB2IP/UNC13A/PRKN/SYT17/LRTM2/CDKL5/APOE/GORAB/CDH4	40	21	ENSSSCG00000027410/ENSSSCG00000026268/ENSSSCG00000003107/ENSSSCG00000035859/ENSSSCG00000015985/ENSSSCG00000014224/ENSSSCG00000040746/ENSSSCG00000004551/ENSSSCG00000009196/ENSSSCG00000010603/ENSSSCG00000026129/ENSSSCG00000008122/ENSSSCG00000003654/ENSSSCG00000000948/ENSSSCG00000005524/ENSSSCG00000013880/ENSSSCG00000004032/ENSSSCG00000022200/ENSSSCG00000000760/ENSSSCG00000012156/ENSSSCG00000025784	19	ENSSSCG00000005096/ENSSSCG00000016916/ENSSSCG00000033228/ENSSSCG00000033025/ENSSSCG00000004339/ENSSSCG00000035746/ENSSSCG00000010457/ENSSSCG00000016842/ENSSSCG00000021206/ENSSSCG00000029615/ENSSSCG00000023165/ENSSSCG00000015398/ENSSSCG00000037449/ENSSSCG00000027130/ENSSSCG00000011243/ENSSSCG00000004582/ENSSSCG00000011736/ENSSSCG00000003088/ENSSSCG00000006280
BP	GO:0001701	in utero embryonic development	43/1419	247/10877	0.0281503689932068	0.489003799616065	ENSSSCG00000030165/ENSSSCG00000010922/ENSSSCG00000005096/ENSSSCG00000004595/ENSSSCG00000032613/ENSSSCG00000006127/ENSSSCG00000006646/ENSSSCG00000005382/ENSSSCG00000015874/ENSSSCG00000002254/ENSSSCG00000015590/ENSSSCG00000021597/ENSSSCG00000009217/ENSSSCG00000010360/ENSSSCG00000039756/ENSSSCG00000016140/ENSSSCG00000011746/ENSSSCG00000011081/ENSSSCG00000014283/ENSSSCG00000030820/ENSSSCG00000015215/…	MAFF/ELF3/HIF1A/ADAM10/SNAI1/NBN/ARNT/TGFBR1/ACVR1/NR2F2/FLVCR1/PHLDA2/PKD2/BMPR1A/FOXC1/FZD5/SKIL/-/KIF3A/STK4/CHEK1/KRT8/FOSL1/EMG1/RBPJ/EGFR/SIN3A/ACVR1B/HEG1/GJB5/SF3B6/CHD7/-/BNIP2/KIDINS220/ADA/CCNB1IP1/TANC2/UBE2B/MED21/ZMIZ1/ZP3/ANKRD11	43	17	ENSSSCG00000006646/ENSSSCG00000015874/ENSSSCG00000002254/ENSSSCG00000015590/ENSSSCG00000009217/ENSSSCG00000039756/ENSSSCG00000016140/ENSSSCG00000030820/ENSSSCG00000022126/ENSSSCG00000001880/ENSSSCG00000000233/ENSSSCG00000011859/ENSSSCG00000006231/ENSSSCG00000008644/ENSSSCG00000017298/ENSSSCG00000010329/ENSSSCG00000039541	26	ENSSSCG00000030165/ENSSSCG00000010922/ENSSSCG00000005096/ENSSSCG00000004595/ENSSSCG00000032613/ENSSSCG00000006127/ENSSSCG00000005382/ENSSSCG00000021597/ENSSSCG00000010360/ENSSSCG00000011746/ENSSSCG00000011081/ENSSSCG00000014283/ENSSSCG00000015215/ENSSSCG00000000252/ENSSSCG00000012967/ENSSSCG00000026812/ENSSSCG00000022155/ENSSSCG00000003585/ENSSSCG00000008587/ENSSSCG00000023195/ENSSSCG00000004582/…
BP	GO:0002699	positive regulation of immune effector process	22/1419	111/10877	0.0282430471212991	0.489003799616065	ENSSSCG00000005385/ENSSSCG00000036828/ENSSSCG00000005267/ENSSSCG00000011848/ENSSSCG00000023724/ENSSSCG00000027074/ENSSSCG00000016140/ENSSSCG00000020931/ENSSSCG00000029615/ENSSSCG00000002740/ENSSSCG00000037719/ENSSSCG00000035954/ENSSSCG00000024592/ENSSSCG00000023165/ENSSSCG00000035859/ENSSSCG00000016395/ENSSSCG00000004190/ENSSSCG00000003591/ENSSSCG00000003042/ENSSSCG00000022820/ENSSSCG00000000634/…	NR4A3/SNX4/ANXA1/TFRC/ZBTB1/FER/FZD5/MSH6/VAMP7/AP1G1/PDPK1/ATAD5/ANKRD17/SEMA7A/WNT5A/RIF1/STX7/PUM1/RPS19/VAMP8/STYK1/ZP3	22	8	ENSSSCG00000016140/ENSSSCG00000020931/ENSSSCG00000002740/ENSSSCG00000037719/ENSSSCG00000024592/ENSSSCG00000035859/ENSSSCG00000003591/ENSSSCG00000000634	14	ENSSSCG00000005385/ENSSSCG00000036828/ENSSSCG00000005267/ENSSSCG00000011848/ENSSSCG00000023724/ENSSSCG00000027074/ENSSSCG00000029615/ENSSSCG00000035954/ENSSSCG00000023165/ENSSSCG00000016395/ENSSSCG00000004190/ENSSSCG00000003042/ENSSSCG00000022820/ENSSSCG00000007691
BP	GO:0002833	positive regulation of response to biotic stimulus	8/1419	29/10877	0.0283109996965471	0.489003799616065	ENSSSCG00000005305/ENSSSCG00000017268/ENSSSCG00000024592/ENSSSCG00000031493/ENSSSCG00000003591/ENSSSCG00000006175/ENSSSCG00000033175/ENSSSCG00000016957	UNC13B/PRKCA/ANKRD17/CYBA/PUM1/LY96/SASH1/CD180	8	6	ENSSSCG00000005305/ENSSSCG00000017268/ENSSSCG00000024592/ENSSSCG00000003591/ENSSSCG00000033175/ENSSSCG00000016957	2	ENSSSCG00000031493/ENSSSCG00000006175
BP	GO:0010972	negative regulation of G2/M transition of mitotic cell cycle	8/1419	29/10877	0.0283109996965471	0.489003799616065	ENSSSCG00000006127/ENSSSCG00000021966/ENSSSCG00000035639/ENSSSCG00000013402/ENSSSCG00000025606/ENSSSCG00000022774/ENSSSCG00000040355/ENSSSCG00000036892	NBN/TOPBP1/NAE1/USP47/ATM/NOP53/TICRR/GPR132	8	1	ENSSSCG00000040355	7	ENSSSCG00000006127/ENSSSCG00000021966/ENSSSCG00000035639/ENSSSCG00000013402/ENSSSCG00000025606/ENSSSCG00000022774/ENSSSCG00000036892
BP	GO:0030890	positive regulation of B cell proliferation	8/1419	29/10877	0.0283109996965471	0.489003799616065	ENSSSCG00000011848/ENSSSCG00000001565/ENSSSCG00000011081/ENSSSCG00000031954/ENSSSCG00000035954/ENSSSCG00000032833/ENSSSCG00000007477/ENSSSCG00000021255	TFRC/CDKN1A/-/SLC39A10/ATAD5/CD320/NFATC2/ADA	8	1	ENSSSCG00000007477	7	ENSSSCG00000011848/ENSSSCG00000001565/ENSSSCG00000011081/ENSSSCG00000031954/ENSSSCG00000035954/ENSSSCG00000032833/ENSSSCG00000021255
BP	GO:0060415	muscle tissue morphogenesis	12/1419	51/10877	0.0283772745066858	0.489003799616065	ENSSSCG00000005382/ENSSSCG00000004755/ENSSSCG00000010360/ENSSSCG00000039756/ENSSSCG00000035859/ENSSSCG00000025334/ENSSSCG00000011867/ENSSSCG00000040746/ENSSSCG00000022155/ENSSSCG00000011859/ENSSSCG00000006231/ENSSSCG00000011441	TGFBR1/DLL4/BMPR1A/FOXC1/WNT5A/POU4F1/MYLK/LRP2/RBPJ/HEG1/CHD7/TNNC1	12	7	ENSSSCG00000039756/ENSSSCG00000035859/ENSSSCG00000025334/ENSSSCG00000011867/ENSSSCG00000040746/ENSSSCG00000011859/ENSSSCG00000006231	5	ENSSSCG00000005382/ENSSSCG00000004755/ENSSSCG00000010360/ENSSSCG00000022155/ENSSSCG00000011441
BP	GO:0006301	postreplication repair	6/1419	19/10877	0.0293201236478379	0.489003799616065	ENSSSCG00000025703/ENSSSCG00000023724/ENSSSCG00000015600/ENSSSCG00000022190/ENSSSCG00000005008/ENSSSCG00000038953	REV3L/ZBTB1/DTL/UBE2V2/POLE2/UBE2B	6	1	ENSSSCG00000015600	5	ENSSSCG00000025703/ENSSSCG00000023724/ENSSSCG00000022190/ENSSSCG00000005008/ENSSSCG00000038953
BP	GO:0006376	mRNA splice site selection	6/1419	19/10877	0.0293201236478379	0.489003799616065	ENSSSCG00000017033/ENSSSCG00000006504/ENSSSCG00000004997/ENSSSCG00000006879/ENSSSCG00000036293/ENSSSCG00000040125	SLU7/KHDC4/PRPF39/PTBP2/SRSF10/NOL3	6	1	ENSSSCG00000006504	5	ENSSSCG00000017033/ENSSSCG00000004997/ENSSSCG00000006879/ENSSSCG00000036293/ENSSSCG00000040125
BP	GO:0032878	regulation of establishment or maintenance of cell polarity	6/1419	19/10877	0.0293201236478379	0.489003799616065	ENSSSCG00000006201/ENSSSCG00000005235/ENSSSCG00000005240/ENSSSCG00000021893/ENSSSCG00000010457/ENSSSCG00000016853	ARFGEF1/KANK1/DOCK8/ROCK1/KIF20B/RICTOR	6	2	ENSSSCG00000005235/ENSSSCG00000005240	4	ENSSSCG00000006201/ENSSSCG00000021893/ENSSSCG00000010457/ENSSSCG00000016853
BP	GO:1901522	positive regulation of transcription from RNA polymerase II promoter involved in cellular response to chemical stimulus	6/1419	19/10877	0.0293201236478379	0.489003799616065	ENSSSCG00000005096/ENSSSCG00000007360/ENSSSCG00000014319/ENSSSCG00000022155/ENSSSCG00000016117/ENSSSCG00000000068	HIF1A/CHD6/SMAD5/RBPJ/CARF/EP300	6	2	ENSSSCG00000007360/ENSSSCG00000000068	4	ENSSSCG00000005096/ENSSSCG00000014319/ENSSSCG00000022155/ENSSSCG00000016117
BP	GO:1900006	positive regulation of dendrite development	7/1419	24/10877	0.029357582448134	0.489003799616065	ENSSSCG00000033025/ENSSSCG00000026268/ENSSSCG00000021206/ENSSSCG00000029615/ENSSSCG00000010603/ENSSSCG00000005524/ENSSSCG00000003088	C21orf91/DLG5/IL1RAP/VAMP7/NEURL1/DAB2IP/APOE	7	3	ENSSSCG00000026268/ENSSSCG00000010603/ENSSSCG00000005524	4	ENSSSCG00000033025/ENSSSCG00000021206/ENSSSCG00000029615/ENSSSCG00000003088
BP	GO:0035282	segmentation	13/1419	57/10877	0.0293809569230086	0.489003799616065	ENSSSCG00000010224/ENSSSCG00000010360/ENSSSCG00000039756/ENSSSCG00000016140/ENSSSCG00000023784/ENSSSCG00000015398/ENSSSCG00000035859/ENSSSCG00000006274/ENSSSCG00000022155/ENSSSCG00000025606/ENSSSCG00000000068/ENSSSCG00000005844/ENSSSCG00000017982	EGR2/BMPR1A/FOXC1/FZD5/SEMA3C/SEMA3A/WNT5A/PRKDC/RBPJ/ATM/EP300/NRARP/HES7	13	6	ENSSSCG00000010224/ENSSSCG00000039756/ENSSSCG00000016140/ENSSSCG00000035859/ENSSSCG00000006274/ENSSSCG00000000068	7	ENSSSCG00000010360/ENSSSCG00000023784/ENSSSCG00000015398/ENSSSCG00000022155/ENSSSCG00000025606/ENSSSCG00000005844/ENSSSCG00000017982
BP	GO:1903902	positive regulation of viral life cycle	13/1419	57/10877	0.0293809569230086	0.489003799616065	ENSSSCG00000012252/ENSSSCG00000010625/ENSSSCG00000006983/ENSSSCG00000017473/ENSSSCG00000004893/ENSSSCG00000000272/ENSSSCG00000038443/ENSSSCG00000012727/ENSSSCG00000014211/ENSSSCG00000014177/ENSSSCG00000033854/ENSSSCG00000000068/ENSSSCG00000017069	DDX3X/SMC3/CNOT7/TOP2A/VPS4B/SP1/ZNF639/FMR1/YTHDC2/CHD1/LGALS1/EP300/LARP1	13	3	ENSSSCG00000000272/ENSSSCG00000000068/ENSSSCG00000017069	10	ENSSSCG00000012252/ENSSSCG00000010625/ENSSSCG00000006983/ENSSSCG00000017473/ENSSSCG00000004893/ENSSSCG00000038443/ENSSSCG00000012727/ENSSSCG00000014211/ENSSSCG00000014177/ENSSSCG00000033854
BP	GO:0002562	somatic diversification of immune receptors via germline recombination within a single locus	10/1419	40/10877	0.0294137169594147	0.489003799616065	ENSSSCG00000006127/ENSSSCG00000013410/ENSSSCG00000011417/ENSSSCG00000011848/ENSSSCG00000008346/ENSSSCG00000020931/ENSSSCG00000035954/ENSSSCG00000006274/ENSSSCG00000016395/ENSSSCG00000025606	NBN/SWAP70/DCAF1/TFRC/APLF/MSH6/ATAD5/PRKDC/RIF1/ATM	10	4	ENSSSCG00000013410/ENSSSCG00000011417/ENSSSCG00000020931/ENSSSCG00000006274	6	ENSSSCG00000006127/ENSSSCG00000011848/ENSSSCG00000008346/ENSSSCG00000035954/ENSSSCG00000016395/ENSSSCG00000025606
BP	GO:0016444	somatic cell DNA recombination	10/1419	40/10877	0.0294137169594147	0.489003799616065	ENSSSCG00000006127/ENSSSCG00000013410/ENSSSCG00000011417/ENSSSCG00000011848/ENSSSCG00000008346/ENSSSCG00000020931/ENSSSCG00000035954/ENSSSCG00000006274/ENSSSCG00000016395/ENSSSCG00000025606	NBN/SWAP70/DCAF1/TFRC/APLF/MSH6/ATAD5/PRKDC/RIF1/ATM	10	4	ENSSSCG00000013410/ENSSSCG00000011417/ENSSSCG00000020931/ENSSSCG00000006274	6	ENSSSCG00000006127/ENSSSCG00000011848/ENSSSCG00000008346/ENSSSCG00000035954/ENSSSCG00000016395/ENSSSCG00000025606
BP	GO:0021915	neural tube development	24/1419	124/10877	0.0294499654909606	0.489003799616065	ENSSSCG00000005096/ENSSSCG00000009217/ENSSSCG00000010457/ENSSSCG00000003532/ENSSSCG00000029385/ENSSSCG00000010189/ENSSSCG00000003107/ENSSSCG00000009142/ENSSSCG00000023784/ENSSSCG00000011081/ENSSSCG00000014283/ENSSSCG00000034491/ENSSSCG00000030820/ENSSSCG00000022705/ENSSSCG00000035859/ENSSSCG00000006302/ENSSSCG00000040746/ENSSSCG00000008984/ENSSSCG00000003559/ENSSSCG00000009079/ENSSSCG00000006280/…	HIF1A/PKD2/KIF20B/LUZP1/LIAS/NUP133/ARHGAP35/SEC24B/SEMA3C/-/KIF3A/PRICKLE1/STK4/SALL2/WNT5A/GPR161/LRP2/SHROOM3/ARID1A/INTU/GORAB/DCHS1/CTHRC1/TBC1D32	24	14	ENSSSCG00000009217/ENSSSCG00000003532/ENSSSCG00000010189/ENSSSCG00000003107/ENSSSCG00000009142/ENSSSCG00000034491/ENSSSCG00000030820/ENSSSCG00000022705/ENSSSCG00000035859/ENSSSCG00000006302/ENSSSCG00000040746/ENSSSCG00000008984/ENSSSCG00000003559/ENSSSCG00000029189	10	ENSSSCG00000005096/ENSSSCG00000010457/ENSSSCG00000029385/ENSSSCG00000023784/ENSSSCG00000011081/ENSSSCG00000014283/ENSSSCG00000009079/ENSSSCG00000006280/ENSSSCG00000006051/ENSSSCG00000004242
BP	GO:0045787	positive regulation of cell cycle	40/1419	228/10877	0.0298287912620037	0.493339059312748	ENSSSCG00000007351/ENSSSCG00000005385/ENSSSCG00000029352/ENSSSCG00000012252/ENSSSCG00000038185/ENSSSCG00000027251/ENSSSCG00000005267/ENSSSCG00000035746/ENSSSCG00000009434/ENSSSCG00000009217/ENSSSCG00000015600/ENSSSCG00000012434/ENSSSCG00000010457/ENSSSCG00000005255/ENSSSCG00000001565/ENSSSCG00000007056/ENSSSCG00000010912/ENSSSCG00000004893/ENSSSCG00000004353/ENSSSCG00000017268/ENSSSCG00000029478/…	FAM83D/NR4A3/CCNL1/DDX3X/EREG/CDC7/ANXA1/ECT2/RGCC/PKD2/DTL/ATRX/KIF20B/SMC5/CDKN1A/PLCB1/KIF14/VPS4B/CCNC/PRKCA/CUL4B/CCPG1/ANKRD17/HMGN5/WNT5A/TPR/EIF4E/POU4F1/PRKAR2A/EGFR/SIN3A/RPS15A/RPL26/-/DAB2IP/UBE2B/CEP120/-/SLF1/BRD4	40	14	ENSSSCG00000007351/ENSSSCG00000027251/ENSSSCG00000009217/ENSSSCG00000015600/ENSSSCG00000010912/ENSSSCG00000017268/ENSSSCG00000024592/ENSSSCG00000035859/ENSSSCG00000025334/ENSSSCG00000011363/ENSSSCG00000022126/ENSSSCG00000001880/ENSSSCG00000005524/ENSSSCG00000022227	26	ENSSSCG00000005385/ENSSSCG00000029352/ENSSSCG00000012252/ENSSSCG00000038185/ENSSSCG00000005267/ENSSSCG00000035746/ENSSSCG00000009434/ENSSSCG00000012434/ENSSSCG00000010457/ENSSSCG00000005255/ENSSSCG00000001565/ENSSSCG00000007056/ENSSSCG00000004893/ENSSSCG00000004353/ENSSSCG00000029478/ENSSSCG00000004610/ENSSSCG00000032946/ENSSSCG00000015576/ENSSSCG00000028420/ENSSSCG00000035768/ENSSSCG00000028850/…
BP	GO:0031346	positive regulation of cell projection organization	31/1419	169/10877	0.0299369935236726	0.493339059312748	ENSSSCG00000033025/ENSSSCG00000016019/ENSSSCG00000005382/ENSSSCG00000008406/ENSSSCG00000001021/ENSSSCG00000004601/ENSSSCG00000027410/ENSSSCG00000026268/ENSSSCG00000003107/ENSSSCG00000021206/ENSSSCG00000029615/ENSSSCG00000023165/ENSSSCG00000035859/ENSSSCG00000029249/ENSSSCG00000022283/ENSSSCG00000031261/ENSSSCG00000039922/ENSSSCG00000010603/ENSSSCG00000027130/ENSSSCG00000011243/ENSSSCG00000003654/…	C21orf91/NCKAP1/TGFBR1/CCDC88A/RREB1/MNS1/CBFA2T2/DLG5/ARHGAP35/IL1RAP/VAMP7/SEMA7A/WNT5A/NAV3/CEP135/RHOQ/CDC42EP5/NEURL1/TNFRSF12A/GOLGA4/MACF1/SYT1/DAB2IP/UNC13A/PRKN/SYT17/CDKL5/APOE/CCP110/CEP120/CDH4	31	15	ENSSSCG00000001021/ENSSSCG00000027410/ENSSSCG00000026268/ENSSSCG00000003107/ENSSSCG00000035859/ENSSSCG00000029249/ENSSSCG00000010603/ENSSSCG00000003654/ENSSSCG00000000948/ENSSSCG00000005524/ENSSSCG00000013880/ENSSSCG00000004032/ENSSSCG00000022200/ENSSSCG00000012156/ENSSSCG00000025784	16	ENSSSCG00000033025/ENSSSCG00000016019/ENSSSCG00000005382/ENSSSCG00000008406/ENSSSCG00000004601/ENSSSCG00000021206/ENSSSCG00000029615/ENSSSCG00000023165/ENSSSCG00000022283/ENSSSCG00000031261/ENSSSCG00000039922/ENSSSCG00000027130/ENSSSCG00000011243/ENSSSCG00000003088/ENSSSCG00000023829/ENSSSCG00000014239
BP	GO:0010675	regulation of cellular carbohydrate metabolic process	15/1419	69/10877	0.0303555863252559	0.498272572780884	ENSSSCG00000008398/ENSSSCG00000031888/ENSSSCG00000003776/ENSSSCG00000021597/ENSSSCG00000025729/ENSSSCG00000035037/ENSSSCG00000006194/ENSSSCG00000022797/ENSSSCG00000000006/ENSSSCG00000012181/ENSSSCG00000010235/ENSSSCG00000013033/ENSSSCG00000004032/ENSSSCG00000024777/ENSSSCG00000002648	PPP4R3B/DDIT4/ACADM/PHLDA2/IRS1/-/NCOA2/PPP1R3B/PPARA/PDK3/SIRT1/BAD/PRKN/HDAC4/CBFA2T3	15	8	ENSSSCG00000025729/ENSSSCG00000006194/ENSSSCG00000022797/ENSSSCG00000000006/ENSSSCG00000012181/ENSSSCG00000004032/ENSSSCG00000024777/ENSSSCG00000002648	7	ENSSSCG00000008398/ENSSSCG00000031888/ENSSSCG00000003776/ENSSSCG00000021597/ENSSSCG00000035037/ENSSSCG00000010235/ENSSSCG00000013033
BP	GO:0030335	positive regulation of cell migration	45/1419	262/10877	0.0310282508196326	0.498272572780884	ENSSSCG00000010312/ENSSSCG00000005096/ENSSSCG00000035355/ENSSSCG00000004595/ENSSSCG00000033228/ENSSSCG00000032613/ENSSSCG00000017705/ENSSSCG00000005382/ENSSSCG00000016254/ENSSSCG00000005240/ENSSSCG00000013410/ENSSSCG00000012131/ENSSSCG00000015874/ENSSSCG00000024351/ENSSSCG00000027074/ENSSSCG00000010457/ENSSSCG00000001021/ENSSSCG00000017466/ENSSSCG00000000804/ENSSSCG00000016842/ENSSSCG00000023784/…	PLAU/HIF1A/F2R/ADAM10/SPAG9/SNAI1/CCL5/TGFBR1/CCL20/DOCK8/SWAP70/MOSPD2/ACVR1/MET/FER/KIF20B/RREB1/CCR7/ANO6/NIPBL/SEMA3C/SP1/PDPK1/PDCD10/PRKCA/CXCL8/CLASP1/-/SEMA3A/CCAR1/WNT5A/CSF1/SEMA6A/MYLK/ZNF609/CXCL2/TIAM1/EGFR/ACVR1B/DOCK5/SASH1/RHOD/DAB2IP/-/ZP3	45	20	ENSSSCG00000035355/ENSSSCG00000005240/ENSSSCG00000013410/ENSSSCG00000015874/ENSSSCG00000001021/ENSSSCG00000000804/ENSSSCG00000000272/ENSSSCG00000037719/ENSSSCG00000017268/ENSSSCG00000039157/ENSSSCG00000035859/ENSSSCG00000014224/ENSSSCG00000011867/ENSSSCG00000004551/ENSSSCG00000012034/ENSSSCG00000022126/ENSSSCG00000000233/ENSSSCG00000009650/ENSSSCG00000033175/ENSSSCG00000005524	25	ENSSSCG00000010312/ENSSSCG00000005096/ENSSSCG00000004595/ENSSSCG00000033228/ENSSSCG00000032613/ENSSSCG00000017705/ENSSSCG00000005382/ENSSSCG00000016254/ENSSSCG00000012131/ENSSSCG00000024351/ENSSSCG00000027074/ENSSSCG00000010457/ENSSSCG00000017466/ENSSSCG00000016842/ENSSSCG00000023784/ENSSSCG00000011739/ENSSSCG00000008953/ENSSSCG00000008954/ENSSSCG00000015398/ENSSSCG00000010243/ENSSSCG00000037449/…
BP	GO:0048608	reproductive structure development	42/1419	242/10877	0.0311418554472163	0.498272572780884	ENSSSCG00000005096/ENSSSCG00000032613/ENSSSCG00000038125/ENSSSCG00000011510/ENSSSCG00000006646/ENSSSCG00000005382/ENSSSCG00000027646/ENSSSCG00000002254/ENSSSCG00000038677/ENSSSCG00000021597/ENSSSCG00000009217/ENSSSCG00000010928/ENSSSCG00000012434/ENSSSCG00000012026/ENSSSCG00000039756/ENSSSCG00000016140/ENSSSCG00000016842/ENSSSCG00000004387/ENSSSCG00000030820/ENSSSCG00000000252/ENSSSCG00000012967/…	HIF1A/SNAI1/NUP210L/TMF1/ARNT/TGFBR1/TIPARP/NR2F2/GJB3/PHLDA2/PKD2/KDM5B/ATRX/ADAMTS1/FOXC1/FZD5/NIPBL/FOXO3/STK4/KRT8/FOSL1/SEMA3A/MAP3K4/WNT5A/FZD4/ARID4A/LRP2/RBPJ/EGFR/SIRT1/ATM/GJB5/CHD7/-/TAF4/ARID1A/IRX5/ADA/SALL1/VGF/KIF18A/ZP3	42	19	ENSSSCG00000006646/ENSSSCG00000002254/ENSSSCG00000009217/ENSSSCG00000010928/ENSSSCG00000012026/ENSSSCG00000039756/ENSSSCG00000016140/ENSSSCG00000004387/ENSSSCG00000030820/ENSSSCG00000004037/ENSSSCG00000035859/ENSSSCG00000014920/ENSSSCG00000040746/ENSSSCG00000022126/ENSSSCG00000006231/ENSSSCG00000024694/ENSSSCG00000003559/ENSSSCG00000032145/ENSSSCG00000002836	23	ENSSSCG00000005096/ENSSSCG00000032613/ENSSSCG00000038125/ENSSSCG00000011510/ENSSSCG00000005382/ENSSSCG00000027646/ENSSSCG00000038677/ENSSSCG00000021597/ENSSSCG00000012434/ENSSSCG00000016842/ENSSSCG00000000252/ENSSSCG00000012967/ENSSSCG00000015398/ENSSSCG00000005073/ENSSSCG00000022155/ENSSSCG00000010235/ENSSSCG00000025606/ENSSSCG00000003585/ENSSSCG00000023195/ENSSSCG00000021255/ENSSSCG00000039053/…
BP	GO:0051702	interaction with symbiont	11/1419	46/10877	0.0313419911360896	0.498272572780884	ENSSSCG00000012252/ENSSSCG00000010625/ENSSSCG00000017705/ENSSSCG00000000272/ENSSSCG00000038443/ENSSSCG00000012727/ENSSSCG00000014211/ENSSSCG00000014177/ENSSSCG00000000068/ENSSSCG00000004032/ENSSSCG00000003088	DDX3X/SMC3/CCL5/SP1/ZNF639/FMR1/YTHDC2/CHD1/EP300/PRKN/APOE	11	3	ENSSSCG00000000272/ENSSSCG00000000068/ENSSSCG00000004032	8	ENSSSCG00000012252/ENSSSCG00000010625/ENSSSCG00000017705/ENSSSCG00000038443/ENSSSCG00000012727/ENSSSCG00000014211/ENSSSCG00000014177/ENSSSCG00000003088
BP	GO:0070227	lymphocyte apoptotic process	11/1419	46/10877	0.0313419911360896	0.498272572780884	ENSSSCG00000006530/ENSSSCG00000003112/ENSSSCG00000005096/ENSSSCG00000017705/ENSSSCG00000005240/ENSSSCG00000002917/ENSSSCG00000031954/ENSSSCG00000035859/ENSSSCG00000008099/ENSSSCG00000037319/ENSSSCG00000021255	EFNA1/-/HIF1A/CCL5/DOCK8/NFKBID/SLC39A10/WNT5A/ZC3H8/PDCD1/ADA	11	2	ENSSSCG00000005240/ENSSSCG00000035859	9	ENSSSCG00000006530/ENSSSCG00000003112/ENSSSCG00000005096/ENSSSCG00000017705/ENSSSCG00000002917/ENSSSCG00000031954/ENSSSCG00000008099/ENSSSCG00000037319/ENSSSCG00000021255
BP	GO:0003174	mitral valve development	4/1419	10/10877	0.0316055650699118	0.498272572780884	ENSSSCG00000006530/ENSSSCG00000015874/ENSSSCG00000010360/ENSSSCG00000029189	EFNA1/ACVR1/BMPR1A/DCHS1	4	2	ENSSSCG00000015874/ENSSSCG00000029189	2	ENSSSCG00000006530/ENSSSCG00000010360
BP	GO:0003183	mitral valve morphogenesis	4/1419	10/10877	0.0316055650699118	0.498272572780884	ENSSSCG00000006530/ENSSSCG00000015874/ENSSSCG00000010360/ENSSSCG00000029189	EFNA1/ACVR1/BMPR1A/DCHS1	4	2	ENSSSCG00000015874/ENSSSCG00000029189	2	ENSSSCG00000006530/ENSSSCG00000010360
BP	GO:0036124	histone H3-K9 trimethylation	4/1419	10/10877	0.0316055650699118	0.498272572780884	ENSSSCG00000012434/ENSSSCG00000031159/ENSSSCG00000005073/ENSSSCG00000010235	ATRX/BEND3/ARID4A/SIRT1	4	1	ENSSSCG00000031159	3	ENSSSCG00000012434/ENSSSCG00000005073/ENSSSCG00000010235
BP	GO:0050995	negative regulation of lipid catabolic process	4/1419	10/10877	0.0316055650699118	0.498272572780884	ENSSSCG00000033766/ENSSSCG00000038700/ENSSSCG00000034090/ENSSSCG00000024644	ETFBKMT/FMC1/CRTC3/CIDEA	4	2	ENSSSCG00000033766/ENSSSCG00000034090	2	ENSSSCG00000038700/ENSSSCG00000024644
BP	GO:0070423	nucleotide-binding oligomerization domain containing signaling pathway	4/1419	10/10877	0.0316055650699118	0.498272572780884	ENSSSCG00000001952/ENSSSCG00000016954/ENSSSCG00000004154/ENSSSCG00000038073	NFKBIA/ERBIN/TNFAIP3/NOD2	4	1	ENSSSCG00000038073	3	ENSSSCG00000001952/ENSSSCG00000016954/ENSSSCG00000004154
BP	GO:0070431	nucleotide-binding oligomerization domain containing 2 signaling pathway	4/1419	10/10877	0.0316055650699118	0.498272572780884	ENSSSCG00000001952/ENSSSCG00000016954/ENSSSCG00000004154/ENSSSCG00000038073	NFKBIA/ERBIN/TNFAIP3/NOD2	4	1	ENSSSCG00000038073	3	ENSSSCG00000001952/ENSSSCG00000016954/ENSSSCG00000004154
BP	GO:0090051	negative regulation of cell migration involved in sprouting angiogenesis	4/1419	10/10877	0.0316055650699118	0.498272572780884	ENSSSCG00000009348/ENSSSCG00000004755/ENSSSCG00000005437/ENSSSCG00000011739	STARD13/DLL4/KLF4/PDCD10	4	1	ENSSSCG00000009348	3	ENSSSCG00000004755/ENSSSCG00000005437/ENSSSCG00000011739
BP	GO:0000726	non-recombinational repair	9/1419	35/10877	0.0319366507026741	0.50168112812438	ENSSSCG00000024419/ENSSSCG00000007954/ENSSSCG00000027709/ENSSSCG00000000754/ENSSSCG00000006274/ENSSSCG00000016395/ENSSSCG00000014136/ENSSSCG00000022240/ENSSSCG00000007881	-/SLX4/PARP9/RAD52/PRKDC/RIF1/VCAN/POLA1/ERCC4	9	6	ENSSSCG00000007954/ENSSSCG00000027709/ENSSSCG00000000754/ENSSSCG00000006274/ENSSSCG00000022240/ENSSSCG00000007881	3	ENSSSCG00000024419/ENSSSCG00000016395/ENSSSCG00000014136
BP	GO:0003002	regionalization	38/1419	216/10877	0.0322947001680832	0.504036686825654	ENSSSCG00000010224/ENSSSCG00000038948/ENSSSCG00000032613/ENSSSCG00000009083/ENSSSCG00000040751/ENSSSCG00000005382/ENSSSCG00000004755/ENSSSCG00000016073/ENSSSCG00000015874/ENSSSCG00000002254/ENSSSCG00000010360/ENSSSCG00000004601/ENSSSCG00000039756/ENSSSCG00000016140/ENSSSCG00000023784/ENSSSCG00000011081/ENSSSCG00000014283/ENSSSCG00000004825/ENSSSCG00000031078/ENSSSCG00000015984/ENSSSCG00000015398/…	EGR2/ETS2/SNAI1/SPRY1/DDIT3/TGFBR1/DLL4/PGAP1/ACVR1/NR2F2/BMPR1A/MNS1/FOXC1/FZD5/SEMA3C/-/KIF3A/CHSY1/SP8/HOXD4/SEMA3A/KMT2A/WNT5A/HOXD3/AHI1/PRKDC/GPR161/LRP2/RBPJ/CYP26B1/ATM/EP300/HIPK2/NRARP/INTU/GORAB/TBC1D32/HES7	38	18	ENSSSCG00000010224/ENSSSCG00000009083/ENSSSCG00000015874/ENSSSCG00000002254/ENSSSCG00000039756/ENSSSCG00000016140/ENSSSCG00000004825/ENSSSCG00000031078/ENSSSCG00000015984/ENSSSCG00000023324/ENSSSCG00000035859/ENSSSCG00000015985/ENSSSCG00000006274/ENSSSCG00000006302/ENSSSCG00000040746/ENSSSCG00000008311/ENSSSCG00000000068/ENSSSCG00000026733	20	ENSSSCG00000038948/ENSSSCG00000032613/ENSSSCG00000040751/ENSSSCG00000005382/ENSSSCG00000004755/ENSSSCG00000016073/ENSSSCG00000010360/ENSSSCG00000004601/ENSSSCG00000023784/ENSSSCG00000011081/ENSSSCG00000014283/ENSSSCG00000015398/ENSSSCG00000004166/ENSSSCG00000022155/ENSSSCG00000025606/ENSSSCG00000005844/ENSSSCG00000009079/ENSSSCG00000006280/ENSSSCG00000004242/ENSSSCG00000017982
BP	GO:0006518	peptide metabolic process	78/1419	489/10877	0.0323174427092244	0.504036686825654	ENSSSCG00000006530/ENSSSCG00000027594/ENSSSCG00000012252/ENSSSCG00000008452/ENSSSCG00000001488/ENSSSCG00000016907/ENSSSCG00000016291/ENSSSCG00000005271/ENSSSCG00000003928/ENSSSCG00000003155/ENSSSCG00000011769/ENSSSCG00000004169/ENSSSCG00000006033/ENSSSCG00000008180/ENSSSCG00000010949/ENSSSCG00000036381/ENSSSCG00000011162/ENSSSCG00000038410/ENSSSCG00000009043/ENSSSCG00000006983/ENSSSCG00000010030/…	EFNA1/USP16/DDX3X/LRPPRC/GCLC/DHX29/GIGYF2/CARNMT1/PLK3/PPP1R15A/FXR1/HBS1L/EIF3E/EIF5B/DAPK1/RBMS3/LARP4B/CPEB2/ABCE1/CNOT7/EIF4ENIF1/MRPL1/EIF4A2/GEMIN5/LARP4/CDKAL1/FOXO3/MARS2/TNRC6C/UHMK1/NOA1/FMR1/RPS21/TNRC6B/TPR/EIF4E/-/NPEPPS/SECISBP2L/PER1/RPS9/SORL1/RPS15/EIF2AK2/EGFR/RPLP2/RPS16/-/PUM1/LIMD1/EEF1D/-/RPL35/RPS3A/MRPS12/FDXACB1/-/RPL34/-/RPL26/NEURL1/ATM/UQCC2/-/RPS26/-/RPS19/-/LARP1/-/…	78	21	ENSSSCG00000001488/ENSSSCG00000016291/ENSSSCG00000010949/ENSSSCG00000011162/ENSSSCG00000010030/ENSSSCG00000017066/ENSSSCG00000004387/ENSSSCG00000034494/ENSSSCG00000034373/ENSSSCG00000025792/ENSSSCG00000000078/ENSSSCG00000017513/ENSSSCG00000015135/ENSSSCG00000022126/ENSSSCG00000003591/ENSSSCG00000011313/ENSSSCG00000021871/ENSSSCG00000010603/ENSSSCG00000017069/ENSSSCG00000018039/ENSSSCG00000023630	57	ENSSSCG00000006530/ENSSSCG00000027594/ENSSSCG00000012252/ENSSSCG00000008452/ENSSSCG00000016907/ENSSSCG00000005271/ENSSSCG00000003928/ENSSSCG00000003155/ENSSSCG00000011769/ENSSSCG00000004169/ENSSSCG00000006033/ENSSSCG00000008180/ENSSSCG00000036381/ENSSSCG00000038410/ENSSSCG00000009043/ENSSSCG00000006983/ENSSSCG00000008990/ENSSSCG00000011803/ENSSSCG00000028516/ENSSSCG00000001080/ENSSSCG00000006342/…
BP	GO:0051493	regulation of cytoskeleton organization	53/1419	317/10877	0.0327269986067198	0.506639068518271	ENSSSCG00000006775/ENSSSCG00000011407/ENSSSCG00000006201/ENSSSCG00000000798/ENSSSCG00000010625/ENSSSCG00000030197/ENSSSCG00000009793/ENSSSCG00000014934/ENSSSCG00000016019/ENSSSCG00000016925/ENSSSCG00000026294/ENSSSCG00000005235/ENSSSCG00000005382/ENSSSCG00000013410/ENSSSCG00000027595/ENSSSCG00000012110/ENSSSCG00000024351/ENSSSCG00000010471/ENSSSCG00000008406/ENSSSCG00000009434/ENSSSCG00000012642/…	CAPZA1/RASSF1/ARFGEF1/TWF1/SMC3/CD2AP/CLIP1/CHORDC1/NCKAP1/PLK2/GMFB/KANK1/TGFBR1/SWAP70/-/MID1/MET/KIF11/CCDC88A/RGCC/STAG2/CAPZA2/ROCK1/CTGF/FER/SENP6/ARHGAP35/XPO1/VPS4B/SPICE1/SSH1/TMEM67/CLASP1/CEP250/TPR/CAMSAP2/RICTOR/NAV3/-/SMC1A/CDC42EP5/TRIM36/KATNBL1/MAGEL2/RHOD/RASSF7/CAPG/GNAI1/PRKN/SYNPO2L/CEP120/KIF18A/GMFG	53	17	ENSSSCG00000016925/ENSSSCG00000005235/ENSSSCG00000013410/ENSSSCG00000027595/ENSSSCG00000012110/ENSSSCG00000004192/ENSSSCG00000003107/ENSSSCG00000024663/ENSSSCG00000009943/ENSSSCG00000039157/ENSSSCG00000021138/ENSSSCG00000027314/ENSSSCG00000029249/ENSSSCG00000012325/ENSSSCG00000004835/ENSSSCG00000004032/ENSSSCG00000010303	36	ENSSSCG00000006775/ENSSSCG00000011407/ENSSSCG00000006201/ENSSSCG00000000798/ENSSSCG00000010625/ENSSSCG00000030197/ENSSSCG00000009793/ENSSSCG00000014934/ENSSSCG00000016019/ENSSSCG00000026294/ENSSSCG00000005382/ENSSSCG00000024351/ENSSSCG00000010471/ENSSSCG00000008406/ENSSSCG00000009434/ENSSSCG00000012642/ENSSSCG00000028113/ENSSSCG00000021893/ENSSSCG00000027074/ENSSSCG00000020702/ENSSSCG00000028228/…
BP	GO:0097193	intrinsic apoptotic signaling pathway	36/1419	203/10877	0.032755220697024	0.506639068518271	ENSSSCG00000032434/ENSSSCG00000003112/ENSSSCG00000005096/ENSSSCG00000004163/ENSSSCG00000012252/ENSSSCG00000040663/ENSSSCG00000023303/ENSSSCG00000032613/ENSSSCG00000006127/ENSSSCG00000031888/ENSSSCG00000040751/ENSSSCG00000034012/ENSSSCG00000011822/ENSSSCG00000031175/ENSSSCG00000016017/ENSSSCG00000001565/ENSSSCG00000020931/ENSSSCG00000011746/ENSSSCG00000011004/ENSSSCG00000011739/ENSSSCG00000013402/…	PLAUR/-/HIF1A/BCLAF1/DDX3X/HERPUD1/FIGNL1/SNAI1/NBN/DDIT4/DDIT3/CASP3/OPA1/FNIP2/DNAJC10/CDKN1A/MSH6/SKIL/TOPORS/PDCD10/USP47/NME5/PRKDC/POU4F1/SIRT1/RPL26/GSDME/NOL3/ATM/BAD/EP300/TP53BP2/HIPK2/DAB2IP/PRKN/RRM2B	36	11	ENSSSCG00000023303/ENSSSCG00000031175/ENSSSCG00000020931/ENSSSCG00000006274/ENSSSCG00000025334/ENSSSCG00000016716/ENSSSCG00000000068/ENSSSCG00000010894/ENSSSCG00000026733/ENSSSCG00000005524/ENSSSCG00000004032	25	ENSSSCG00000032434/ENSSSCG00000003112/ENSSSCG00000005096/ENSSSCG00000004163/ENSSSCG00000012252/ENSSSCG00000040663/ENSSSCG00000032613/ENSSSCG00000006127/ENSSSCG00000031888/ENSSSCG00000040751/ENSSSCG00000034012/ENSSSCG00000011822/ENSSSCG00000016017/ENSSSCG00000001565/ENSSSCG00000011746/ENSSSCG00000011004/ENSSSCG00000011739/ENSSSCG00000013402/ENSSSCG00000027997/ENSSSCG00000010235/ENSSSCG00000028850/…
BP	GO:0000209	protein polyubiquitination	26/1419	138/10877	0.0328323463225717	0.506639068518271	ENSSSCG00000017043/ENSSSCG00000006066/ENSSSCG00000010563/ENSSSCG00000016170/ENSSSCG00000005575/ENSSSCG00000015600/ENSSSCG00000017308/ENSSSCG00000016564/ENSSSCG00000008105/ENSSSCG00000022190/ENSSSCG00000004589/ENSSSCG00000004154/ENSSSCG00000011004/ENSSSCG00000024373/ENSSSCG00000033057/ENSSSCG00000012328/ENSSSCG00000038073/ENSSSCG00000006177/ENSSSCG00000023307/ENSSSCG00000004835/ENSSSCG00000033175/…	RNF145/RNF19A/BTRC/BARD1/RC3H2/DTL/CDC27/UBE2H/ANAPC1/UBE2V2/RNF111/TNFAIP3/TOPORS/TRIP12/ANAPC13/HUWE1/NOD2/-/FBXW11/MAGEL2/SASH1/RNF146/UBE2B/RNF216/PRKN/DZIP3	26	15	ENSSSCG00000017043/ENSSSCG00000010563/ENSSSCG00000016170/ENSSSCG00000015600/ENSSSCG00000016564/ENSSSCG00000008105/ENSSSCG00000004589/ENSSSCG00000024373/ENSSSCG00000012328/ENSSSCG00000038073/ENSSSCG00000023307/ENSSSCG00000004835/ENSSSCG00000033175/ENSSSCG00000021285/ENSSSCG00000004032	11	ENSSSCG00000006066/ENSSSCG00000005575/ENSSSCG00000017308/ENSSSCG00000022190/ENSSSCG00000004154/ENSSSCG00000011004/ENSSSCG00000033057/ENSSSCG00000006177/ENSSSCG00000004217/ENSSSCG00000038953/ENSSSCG00000011940
BP	GO:0010720	positive regulation of cell development	42/1419	243/10877	0.0330695617559077	0.508502733056511	ENSSSCG00000005096/ENSSSCG00000016916/ENSSSCG00000033228/ENSSSCG00000033025/ENSSSCG00000004339/ENSSSCG00000035746/ENSSSCG00000010457/ENSSSCG00000001021/ENSSSCG00000027410/ENSSSCG00000026268/ENSSSCG00000003107/ENSSSCG00000016842/ENSSSCG00000023784/ENSSSCG00000021206/ENSSSCG00000029615/ENSSSCG00000023165/ENSSSCG00000015398/ENSSSCG00000035859/ENSSSCG00000037449/ENSSSCG00000015985/ENSSSCG00000014224/…	HIF1A/IL6ST/SPAG9/C21orf91/UFL1/ECT2/KIF20B/RREB1/CBFA2T2/DLG5/ARHGAP35/NIPBL/SEMA3C/IL1RAP/VAMP7/SEMA7A/SEMA3A/WNT5A/CSF1/HOXD3/SEMA6A/PRKAR2A/LRP2/ZNF609/ATOH1/DOCK5/NEURL1/BAD/TNFRSF12A/GOLGA4/ADRA2B/MACF1/BNIP2/SYT1/-/DAB2IP/UNC13A/PRKN/SYT17/CDKL5/APOE/CDH4	42	22	ENSSSCG00000001021/ENSSSCG00000027410/ENSSSCG00000026268/ENSSSCG00000003107/ENSSSCG00000035859/ENSSSCG00000015985/ENSSSCG00000014224/ENSSSCG00000011363/ENSSSCG00000040746/ENSSSCG00000004551/ENSSSCG00000009196/ENSSSCG00000009650/ENSSSCG00000010603/ENSSSCG00000008122/ENSSSCG00000003654/ENSSSCG00000000948/ENSSSCG00000005524/ENSSSCG00000013880/ENSSSCG00000004032/ENSSSCG00000022200/ENSSSCG00000012156/…	20	ENSSSCG00000005096/ENSSSCG00000016916/ENSSSCG00000033228/ENSSSCG00000033025/ENSSSCG00000004339/ENSSSCG00000035746/ENSSSCG00000010457/ENSSSCG00000016842/ENSSSCG00000023784/ENSSSCG00000021206/ENSSSCG00000029615/ENSSSCG00000023165/ENSSSCG00000015398/ENSSSCG00000037449/ENSSSCG00000013033/ENSSSCG00000027130/ENSSSCG00000011243/ENSSSCG00000004582/ENSSSCG00000010214/ENSSSCG00000003088
BP	GO:0007093	mitotic cell cycle checkpoint	18/1419	88/10877	0.0334399263167122	0.508822850958474	ENSSSCG00000011213/ENSSSCG00000016291/ENSSSCG00000016346/ENSSSCG00000006127/ENSSSCG00000016925/ENSSSCG00000004466/ENSSSCG00000021966/ENSSSCG00000035639/ENSSSCG00000039546/ENSSSCG00000017473/ENSSSCG00000001565/ENSSSCG00000015215/ENSSSCG00000015576/ENSSSCG00000006274/ENSSSCG00000028850/ENSSSCG00000025606/ENSSSCG00000022774/ENSSSCG00000040355	TOP2B/GIGYF2/MAD2L1BP/NBN/PLK2/TTK/TOPBP1/NAE1/KNTC1/TOP2A/CDKN1A/CHEK1/TPR/PRKDC/RPL26/ATM/NOP53/TICRR	18	5	ENSSSCG00000016291/ENSSSCG00000016346/ENSSSCG00000016925/ENSSSCG00000006274/ENSSSCG00000040355	13	ENSSSCG00000011213/ENSSSCG00000006127/ENSSSCG00000004466/ENSSSCG00000021966/ENSSSCG00000035639/ENSSSCG00000039546/ENSSSCG00000017473/ENSSSCG00000001565/ENSSSCG00000015215/ENSSSCG00000015576/ENSSSCG00000028850/ENSSSCG00000025606/ENSSSCG00000022774
BP	GO:0030178	negative regulation of Wnt signaling pathway	18/1419	88/10877	0.0334399263167122	0.508822850958474	ENSSSCG00000040751/ENSSSCG00000036381/ENSSSCG00000011733/ENSSSCG00000013174/ENSSSCG00000034491/ENSSSCG00000004387/ENSSSCG00000030820/ENSSSCG00000014336/ENSSSCG00000035859/ENSSSCG00000015507/ENSSSCG00000009007/ENSSSCG00000011313/ENSSSCG00000009971/ENSSSCG00000005524/ENSSSCG00000004032/ENSSSCG00000003088/ENSSSCG00000010638/ENSSSCG00000006051	DDIT3/RBMS3/-/CTNND1/PRICKLE1/FOXO3/STK4/EGR1/WNT5A/TNN/TMEM131L/LIMD1/ZNRF3/DAB2IP/PRKN/APOE/TCF7L2/CTHRC1	18	13	ENSSSCG00000013174/ENSSSCG00000034491/ENSSSCG00000004387/ENSSSCG00000030820/ENSSSCG00000014336/ENSSSCG00000035859/ENSSSCG00000015507/ENSSSCG00000009007/ENSSSCG00000011313/ENSSSCG00000009971/ENSSSCG00000005524/ENSSSCG00000004032/ENSSSCG00000010638	5	ENSSSCG00000040751/ENSSSCG00000036381/ENSSSCG00000011733/ENSSSCG00000003088/ENSSSCG00000006051
BP	GO:0032874	positive regulation of stress-activated MAPK cascade	18/1419	88/10877	0.0334399263167122	0.508822850958474	ENSSSCG00000022689/ENSSSCG00000033228/ENSSSCG00000015801/ENSSSCG00000012110/ENSSSCG00000035249/ENSSSCG00000004192/ENSSSCG00000016140/ENSSSCG00000007056/ENSSSCG00000011739/ENSSSCG00000004037/ENSSSCG00000035859/ENSSSCG00000014920/ENSSSCG00000038073/ENSSSCG00000008496/ENSSSCG00000033175/ENSSSCG00000026733/ENSSSCG00000005524/ENSSSCG00000004898	GADD45B/SPAG9/TLR3/MID1/GADD45G/CTGF/FZD5/PLCB1/PDCD10/MAP3K4/WNT5A/FZD4/NOD2/EIF2AK2/SASH1/HIPK2/DAB2IP/TNFRSF11A	18	11	ENSSSCG00000012110/ENSSSCG00000004192/ENSSSCG00000016140/ENSSSCG00000004037/ENSSSCG00000035859/ENSSSCG00000014920/ENSSSCG00000038073/ENSSSCG00000033175/ENSSSCG00000026733/ENSSSCG00000005524/ENSSSCG00000004898	7	ENSSSCG00000022689/ENSSSCG00000033228/ENSSSCG00000015801/ENSSSCG00000035249/ENSSSCG00000007056/ENSSSCG00000011739/ENSSSCG00000008496
BP	GO:0007548	sex differentiation	25/1419	132/10877	0.0338801694862	0.50967469038085	ENSSSCG00000038125/ENSSSCG00000011510/ENSSSCG00000005382/ENSSSCG00000027646/ENSSSCG00000010360/ENSSSCG00000012434/ENSSSCG00000012026/ENSSSCG00000039756/ENSSSCG00000016842/ENSSSCG00000004387/ENSSSCG00000028536/ENSSSCG00000015398/ENSSSCG00000035859/ENSSSCG00000014920/ENSSSCG00000005073/ENSSSCG00000040746/ENSSSCG00000010235/ENSSSCG00000025606/ENSSSCG00000006231/ENSSSCG00000024694/ENSSSCG00000032145/…	NUP210L/TMF1/TGFBR1/TIPARP/BMPR1A/ATRX/ADAMTS1/FOXC1/NIPBL/FOXO3/LHFPL2/SEMA3A/WNT5A/FZD4/ARID4A/LRP2/SIRT1/ATM/CHD7/TAF4/IRX5/SALL1/VGF/KIF18A/ZP3	25	11	ENSSSCG00000012026/ENSSSCG00000039756/ENSSSCG00000004387/ENSSSCG00000028536/ENSSSCG00000035859/ENSSSCG00000014920/ENSSSCG00000040746/ENSSSCG00000006231/ENSSSCG00000024694/ENSSSCG00000032145/ENSSSCG00000002836	14	ENSSSCG00000038125/ENSSSCG00000011510/ENSSSCG00000005382/ENSSSCG00000027646/ENSSSCG00000010360/ENSSSCG00000012434/ENSSSCG00000016842/ENSSSCG00000015398/ENSSSCG00000005073/ENSSSCG00000010235/ENSSSCG00000025606/ENSSSCG00000039053/ENSSSCG00000013332/ENSSSCG00000007691
BP	GO:0000082	G1/S transition of mitotic cell cycle	22/1419	113/10877	0.0338947442973854	0.50967469038085	ENSSSCG00000012252/ENSSSCG00000016291/ENSSSCG00000003928/ENSSSCG00000016925/ENSSSCG00000015874/ENSSSCG00000005267/ENSSSCG00000009434/ENSSSCG00000009217/ENSSSCG00000026959/ENSSSCG00000001565/ENSSSCG00000007056/ENSSSCG00000010912/ENSSSCG00000029478/ENSSSCG00000024592/ENSSSCG00000006274/ENSSSCG00000028420/ENSSSCG00000022126/ENSSSCG00000000233/ENSSSCG00000028850/ENSSSCG00000036892/ENSSSCG00000006095/…	DDX3X/GIGYF2/PLK3/PLK2/ACVR1/ANXA1/RGCC/PKD2/NPAT/CDKN1A/PLCB1/KIF14/CUL4B/ANKRD17/PRKDC/EIF4E/EGFR/ACVR1B/RPL26/GPR132/CCNE2/BRD4	22	10	ENSSSCG00000016291/ENSSSCG00000016925/ENSSSCG00000015874/ENSSSCG00000009217/ENSSSCG00000010912/ENSSSCG00000024592/ENSSSCG00000006274/ENSSSCG00000022126/ENSSSCG00000000233/ENSSSCG00000022227	12	ENSSSCG00000012252/ENSSSCG00000003928/ENSSSCG00000005267/ENSSSCG00000009434/ENSSSCG00000026959/ENSSSCG00000001565/ENSSSCG00000007056/ENSSSCG00000029478/ENSSSCG00000028420/ENSSSCG00000028850/ENSSSCG00000036892/ENSSSCG00000006095
BP	GO:0016573	histone acetylation	22/1419	113/10877	0.0338947442973854	0.50967469038085	ENSSSCG00000024253/ENSSSCG00000027115/ENSSSCG00000031159/ENSSSCG00000017310/ENSSSCG00000011081/ENSSSCG00000015952/ENSSSCG00000011917/ENSSSCG00000015215/ENSSSCG00000027211/ENSSSCG00000023324/ENSSSCG00000007458/ENSSSCG00000007023/ENSSSCG00000011540/ENSSSCG00000017983/ENSSSCG00000007606/ENSSSCG00000001880/ENSSSCG00000011776/ENSSSCG00000010235/ENSSSCG00000007951/ENSSSCG00000000068/ENSSSCG00000028018/…	CTCF/-/BEND3/KANSL1/-/HAT1/-/CHEK1/EPC2/KMT2A/NCOA3/KAT6A/SETD5/PER1/TRRAP/SIN3A/YEATS2/SIRT1/CREBBP/EP300/EP400/HCFC1	22	15	ENSSSCG00000024253/ENSSSCG00000027115/ENSSSCG00000031159/ENSSSCG00000017310/ENSSSCG00000023324/ENSSSCG00000007458/ENSSSCG00000007023/ENSSSCG00000011540/ENSSSCG00000007606/ENSSSCG00000001880/ENSSSCG00000011776/ENSSSCG00000007951/ENSSSCG00000000068/ENSSSCG00000028018/ENSSSCG00000012793	7	ENSSSCG00000011081/ENSSSCG00000015952/ENSSSCG00000011917/ENSSSCG00000015215/ENSSSCG00000027211/ENSSSCG00000017983/ENSSSCG00000010235
BP	GO:0006997	nucleus organization	16/1419	76/10877	0.0340794617795302	0.50967469038085	ENSSSCG00000006496/ENSSSCG00000010863/ENSSSCG00000011510/ENSSSCG00000027503/ENSSSCG00000008098/ENSSSCG00000026034/ENSSSCG00000030443/ENSSSCG00000010189/ENSSSCG00000036476/ENSSSCG00000004893/ENSSSCG00000015215/ENSSSCG00000006239/ENSSSCG00000026812/ENSSSCG00000015576/ENSSSCG00000003042/ENSSSCG00000028065	LMNA/AHCTF1/TMF1/OSBPL8/POLR1B/NUP153/INTS13/NUP133/REEP3/VPS4B/CHEK1/UBXN2B/EMG1/TPR/RPS19/USPL1	16	4	ENSSSCG00000008098/ENSSSCG00000026034/ENSSSCG00000010189/ENSSSCG00000006239	12	ENSSSCG00000006496/ENSSSCG00000010863/ENSSSCG00000011510/ENSSSCG00000027503/ENSSSCG00000030443/ENSSSCG00000036476/ENSSSCG00000004893/ENSSSCG00000015215/ENSSSCG00000026812/ENSSSCG00000015576/ENSSSCG00000003042/ENSSSCG00000028065
BP	GO:0008630	intrinsic apoptotic signaling pathway in response to DNA damage	16/1419	76/10877	0.0340794617795302	0.50967469038085	ENSSSCG00000003112/ENSSSCG00000032613/ENSSSCG00000031888/ENSSSCG00000031175/ENSSSCG00000001565/ENSSSCG00000020931/ENSSSCG00000011746/ENSSSCG00000011004/ENSSSCG00000013402/ENSSSCG00000006274/ENSSSCG00000010235/ENSSSCG00000028850/ENSSSCG00000025606/ENSSSCG00000013033/ENSSSCG00000000068/ENSSSCG00000026733	-/SNAI1/DDIT4/FNIP2/CDKN1A/MSH6/SKIL/TOPORS/USP47/PRKDC/SIRT1/RPL26/ATM/BAD/EP300/HIPK2	16	5	ENSSSCG00000031175/ENSSSCG00000020931/ENSSSCG00000006274/ENSSSCG00000000068/ENSSSCG00000026733	11	ENSSSCG00000003112/ENSSSCG00000032613/ENSSSCG00000031888/ENSSSCG00000001565/ENSSSCG00000011746/ENSSSCG00000011004/ENSSSCG00000013402/ENSSSCG00000010235/ENSSSCG00000028850/ENSSSCG00000025606/ENSSSCG00000013033
BP	GO:0043388	positive regulation of DNA binding	8/1419	30/10877	0.0343323825314488	0.509964335084479	ENSSSCG00000032434/ENSSSCG00000005437/ENSSSCG00000039756/ENSSSCG00000010357/ENSSSCG00000005453/ENSSSCG00000025334/ENSSSCG00000026733/ENSSSCG00000004032	PLAUR/KLF4/FOXC1/WAPL/-/POU4F1/HIPK2/PRKN	8	4	ENSSSCG00000039756/ENSSSCG00000025334/ENSSSCG00000026733/ENSSSCG00000004032	4	ENSSSCG00000032434/ENSSSCG00000005437/ENSSSCG00000010357/ENSSSCG00000005453
BP	GO:0070265	necrotic cell death	8/1419	30/10877	0.0343323825314488	0.509964335084479	ENSSSCG00000027529/ENSSSCG00000015801/ENSSSCG00000004636/ENSSSCG00000002716/ENSSSCG00000016716/ENSSSCG00000040125/ENSSSCG00000024254/ENSSSCG00000010448	BIRC3/TLR3/TRPM7/MLKL/GSDME/NOL3/ALKBH7/FAS	8	3	ENSSSCG00000002716/ENSSSCG00000016716/ENSSSCG00000010448	5	ENSSSCG00000027529/ENSSSCG00000015801/ENSSSCG00000004636/ENSSSCG00000040125/ENSSSCG00000024254
BP	GO:0030888	regulation of B cell proliferation	10/1419	41/10877	0.0345092743216651	0.510854240551564	ENSSSCG00000034012/ENSSSCG00000011848/ENSSSCG00000001565/ENSSSCG00000011081/ENSSSCG00000031954/ENSSSCG00000035954/ENSSSCG00000025606/ENSSSCG00000032833/ENSSSCG00000007477/ENSSSCG00000021255	CASP3/TFRC/CDKN1A/-/SLC39A10/ATAD5/ATM/CD320/NFATC2/ADA	10	1	ENSSSCG00000007477	9	ENSSSCG00000034012/ENSSSCG00000011848/ENSSSCG00000001565/ENSSSCG00000011081/ENSSSCG00000031954/ENSSSCG00000035954/ENSSSCG00000025606/ENSSSCG00000032833/ENSSSCG00000021255
BP	GO:1903900	regulation of viral life cycle	20/1419	101/10877	0.0355656858825542	0.511292812904993	ENSSSCG00000012252/ENSSSCG00000010625/ENSSSCG00000017705/ENSSSCG00000006983/ENSSSCG00000017473/ENSSSCG00000004893/ENSSSCG00000000272/ENSSSCG00000038443/ENSSSCG00000008953/ENSSSCG00000012727/ENSSSCG00000014211/ENSSSCG00000014177/ENSSSCG00000008496/ENSSSCG00000036568/ENSSSCG00000033854/ENSSSCG00000013664/ENSSSCG00000000068/ENSSSCG00000017069/ENSSSCG00000004032/ENSSSCG00000010454	DDX3X/SMC3/CCL5/CNOT7/TOP2A/VPS4B/SP1/ZNF639/CXCL8/FMR1/YTHDC2/CHD1/EIF2AK2/MVB12A/LGALS1/C19orf66/EP300/LARP1/PRKN/IFIT5	20	4	ENSSSCG00000000272/ENSSSCG00000000068/ENSSSCG00000017069/ENSSSCG00000004032	16	ENSSSCG00000012252/ENSSSCG00000010625/ENSSSCG00000017705/ENSSSCG00000006983/ENSSSCG00000017473/ENSSSCG00000004893/ENSSSCG00000038443/ENSSSCG00000008953/ENSSSCG00000012727/ENSSSCG00000014211/ENSSSCG00000014177/ENSSSCG00000008496/ENSSSCG00000036568/ENSSSCG00000033854/ENSSSCG00000013664/ENSSSCG00000010454
BP	GO:0002696	positive regulation of leukocyte activation	30/1419	165/10877	0.0359045198653497	0.511292812904993	ENSSSCG00000005385/ENSSSCG00000016916/ENSSSCG00000017705/ENSSSCG00000012713/ENSSSCG00000036828/ENSSSCG00000005240/ENSSSCG00000005267/ENSSSCG00000011848/ENSSSCG00000023724/ENSSSCG00000017466/ENSSSCG00000001565/ENSSSCG00000031498/ENSSSCG00000020931/ENSSSCG00000011081/ENSSSCG00000029615/ENSSSCG00000002740/ENSSSCG00000031954/ENSSSCG00000035954/ENSSSCG00000035859/ENSSSCG00000016395/ENSSSCG00000017948/…	NR4A3/IL6ST/CCL5/ATP11C/SNX4/DOCK8/ANXA1/TFRC/ZBTB1/CCR7/CDKN1A/PPP2R3C/MSH6/-/VAMP7/AP1G1/SLC39A10/ATAD5/WNT5A/RIF1/EFNB3/NOD2/LGALS1/CD320/BAD/NFATC2/VAMP8/ADA/ZMIZ1/ZP3	30	8	ENSSSCG00000005240/ENSSSCG00000020931/ENSSSCG00000002740/ENSSSCG00000035859/ENSSSCG00000017948/ENSSSCG00000038073/ENSSSCG00000007477/ENSSSCG00000010329	22	ENSSSCG00000005385/ENSSSCG00000016916/ENSSSCG00000017705/ENSSSCG00000012713/ENSSSCG00000036828/ENSSSCG00000005267/ENSSSCG00000011848/ENSSSCG00000023724/ENSSSCG00000017466/ENSSSCG00000001565/ENSSSCG00000031498/ENSSSCG00000011081/ENSSSCG00000029615/ENSSSCG00000031954/ENSSSCG00000035954/ENSSSCG00000016395/ENSSSCG00000033854/ENSSSCG00000032833/ENSSSCG00000013033/ENSSSCG00000022820/ENSSSCG00000021255/…
BP	GO:0018394	peptidyl-lysine acetylation	23/1419	120/10877	0.0359805963441142	0.511292812904993	ENSSSCG00000024253/ENSSSCG00000027115/ENSSSCG00000031159/ENSSSCG00000017310/ENSSSCG00000011081/ENSSSCG00000015952/ENSSSCG00000011917/ENSSSCG00000015215/ENSSSCG00000027211/ENSSSCG00000023324/ENSSSCG00000003700/ENSSSCG00000007458/ENSSSCG00000007023/ENSSSCG00000011540/ENSSSCG00000017983/ENSSSCG00000007606/ENSSSCG00000001880/ENSSSCG00000011776/ENSSSCG00000010235/ENSSSCG00000007951/ENSSSCG00000000068/…	CTCF/-/BEND3/KANSL1/-/HAT1/-/CHEK1/EPC2/KMT2A/ESCO1/NCOA3/KAT6A/SETD5/PER1/TRRAP/SIN3A/YEATS2/SIRT1/CREBBP/EP300/EP400/HCFC1	23	15	ENSSSCG00000024253/ENSSSCG00000027115/ENSSSCG00000031159/ENSSSCG00000017310/ENSSSCG00000023324/ENSSSCG00000007458/ENSSSCG00000007023/ENSSSCG00000011540/ENSSSCG00000007606/ENSSSCG00000001880/ENSSSCG00000011776/ENSSSCG00000007951/ENSSSCG00000000068/ENSSSCG00000028018/ENSSSCG00000012793	8	ENSSSCG00000011081/ENSSSCG00000015952/ENSSSCG00000011917/ENSSSCG00000015215/ENSSSCG00000027211/ENSSSCG00000003700/ENSSSCG00000017983/ENSSSCG00000010235
BP	GO:0043535	regulation of blood vessel endothelial cell migration	11/1419	47/10877	0.0362658773547807	0.511292812904993	ENSSSCG00000006530/ENSSSCG00000005096/ENSSSCG00000009348/ENSSSCG00000004755/ENSSSCG00000009434/ENSSSCG00000005437/ENSSSCG00000000272/ENSSSCG00000037719/ENSSSCG00000011739/ENSSSCG00000017268/ENSSSCG00000003088	EFNA1/HIF1A/STARD13/DLL4/RGCC/KLF4/SP1/PDPK1/PDCD10/PRKCA/APOE	11	4	ENSSSCG00000009348/ENSSSCG00000000272/ENSSSCG00000037719/ENSSSCG00000017268	7	ENSSSCG00000006530/ENSSSCG00000005096/ENSSSCG00000004755/ENSSSCG00000009434/ENSSSCG00000005437/ENSSSCG00000011739/ENSSSCG00000003088
BP	GO:0007050	cell cycle arrest	19/1419	95/10877	0.0363208207852279	0.511292812904993	ENSSSCG00000011407/ENSSSCG00000031882/ENSSSCG00000014277/ENSSSCG00000040751/ENSSSCG00000009434/ENSSSCG00000009217/ENSSSCG00000001565/ENSSSCG00000011746/ENSSSCG00000006342/ENSSSCG00000008953/ENSSSCG00000006709/ENSSSCG00000032946/ENSSSCG00000027557/ENSSSCG00000025334/ENSSSCG00000028850/ENSSSCG00000025606/ENSSSCG00000005524/ENSSSCG00000037461/ENSSSCG00000010638	RASSF1/PNPT1/IRF1/DDIT3/RGCC/PKD2/CDKN1A/SKIL/UHMK1/CXCL8/NOTCH2/HMGN5/CDC14B/POU4F1/RPL26/ATM/DAB2IP/MLF1/TCF7L2	19	6	ENSSSCG00000009217/ENSSSCG00000006709/ENSSSCG00000027557/ENSSSCG00000025334/ENSSSCG00000005524/ENSSSCG00000010638	13	ENSSSCG00000011407/ENSSSCG00000031882/ENSSSCG00000014277/ENSSSCG00000040751/ENSSSCG00000009434/ENSSSCG00000001565/ENSSSCG00000011746/ENSSSCG00000006342/ENSSSCG00000008953/ENSSSCG00000032946/ENSSSCG00000028850/ENSSSCG00000025606/ENSSSCG00000037461
BP	GO:0000959	mitochondrial RNA metabolic process	7/1419	25/10877	0.0363252716372038	0.511292812904993	ENSSSCG00000031882/ENSSSCG00000008452/ENSSSCG00000040185/ENSSSCG00000011529/ENSSSCG00000033148/ENSSSCG00000011956/ENSSSCG00000015309	PNPT1/LRPPRC/TFAM/TRNT1/MRPL12/TRMT10C/MTERF1	7	0		7	ENSSSCG00000031882/ENSSSCG00000008452/ENSSSCG00000040185/ENSSSCG00000011529/ENSSSCG00000033148/ENSSSCG00000011956/ENSSSCG00000015309
BP	GO:0043300	regulation of leukocyte degranulation	7/1419	25/10877	0.0363252716372038	0.511292812904993	ENSSSCG00000036828/ENSSSCG00000027074/ENSSSCG00000029615/ENSSSCG00000002740/ENSSSCG00000037719/ENSSSCG00000022820/ENSSSCG00000000634	SNX4/FER/VAMP7/AP1G1/PDPK1/VAMP8/STYK1	7	3	ENSSSCG00000002740/ENSSSCG00000037719/ENSSSCG00000000634	4	ENSSSCG00000036828/ENSSSCG00000027074/ENSSSCG00000029615/ENSSSCG00000022820
BP	GO:0051193	regulation of cofactor metabolic process	7/1419	25/10877	0.0363252716372038	0.511292812904993	ENSSSCG00000005096/ENSSSCG00000031888/ENSSSCG00000000006/ENSSSCG00000012181/ENSSSCG00000024777/ENSSSCG00000018039/ENSSSCG00000002648	HIF1A/DDIT4/PPARA/PDK3/HDAC4/NCOR1/CBFA2T3	7	5	ENSSSCG00000000006/ENSSSCG00000012181/ENSSSCG00000024777/ENSSSCG00000018039/ENSSSCG00000002648	2	ENSSSCG00000005096/ENSSSCG00000031888
BP	GO:0051196	regulation of coenzyme metabolic process	7/1419	25/10877	0.0363252716372038	0.511292812904993	ENSSSCG00000005096/ENSSSCG00000031888/ENSSSCG00000000006/ENSSSCG00000012181/ENSSSCG00000024777/ENSSSCG00000018039/ENSSSCG00000002648	HIF1A/DDIT4/PPARA/PDK3/HDAC4/NCOR1/CBFA2T3	7	5	ENSSSCG00000000006/ENSSSCG00000012181/ENSSSCG00000024777/ENSSSCG00000018039/ENSSSCG00000002648	2	ENSSSCG00000005096/ENSSSCG00000031888
BP	GO:0043604	amide biosynthetic process	73/1419	457/10877	0.0363977344545226	0.511292812904993	ENSSSCG00000027594/ENSSSCG00000012252/ENSSSCG00000008452/ENSSSCG00000001488/ENSSSCG00000016907/ENSSSCG00000016291/ENSSSCG00000003155/ENSSSCG00000011769/ENSSSCG00000004169/ENSSSCG00000006033/ENSSSCG00000008180/ENSSSCG00000010949/ENSSSCG00000036381/ENSSSCG00000011162/ENSSSCG00000038410/ENSSSCG00000009043/ENSSSCG00000006983/ENSSSCG00000010030/ENSSSCG00000008990/ENSSSCG00000011803/ENSSSCG00000017066/…	USP16/DDX3X/LRPPRC/GCLC/DHX29/GIGYF2/PPP1R15A/FXR1/HBS1L/EIF3E/EIF5B/DAPK1/RBMS3/LARP4B/CPEB2/ABCE1/CNOT7/EIF4ENIF1/MRPL1/EIF4A2/GEMIN5/LARP4/CDKAL1/FOXO3/MARS2/TNRC6C/UHMK1/NOA1/FMR1/RPS21/UGCG/TNRC6B/TPR/EIF4E/-/-/SECISBP2L/PER1/RPS9/RPS15/EIF2AK2/EGFR/RPLP2/RPS16/-/PUM1/LIMD1/EEF1D/-/RPL35/RPS3A/MRPS12/FDXACB1/-/RPL34/-/RPL26/NEURL1/ATM/UQCC2/-/RPS26/-/RPS19/-/LARP1/-/-/RPL9/MRPS34/TRMT10C/NCO…	73	18	ENSSSCG00000001488/ENSSSCG00000016291/ENSSSCG00000010949/ENSSSCG00000011162/ENSSSCG00000010030/ENSSSCG00000017066/ENSSSCG00000004387/ENSSSCG00000034494/ENSSSCG00000034373/ENSSSCG00000025792/ENSSSCG00000000078/ENSSSCG00000022126/ENSSSCG00000003591/ENSSSCG00000011313/ENSSSCG00000021871/ENSSSCG00000010603/ENSSSCG00000017069/ENSSSCG00000018039	55	ENSSSCG00000027594/ENSSSCG00000012252/ENSSSCG00000008452/ENSSSCG00000016907/ENSSSCG00000003155/ENSSSCG00000011769/ENSSSCG00000004169/ENSSSCG00000006033/ENSSSCG00000008180/ENSSSCG00000036381/ENSSSCG00000038410/ENSSSCG00000009043/ENSSSCG00000006983/ENSSSCG00000008990/ENSSSCG00000011803/ENSSSCG00000028516/ENSSSCG00000001080/ENSSSCG00000006342/ENSSSCG00000012727/ENSSSCG00000002529/ENSSSCG00000022780/…
BP	GO:0031664	regulation of lipopolysaccharide-mediated signaling pathway	5/1419	15/10877	0.036529278137476	0.511292812904993	ENSSSCG00000004154/ENSSSCG00000017268/ENSSSCG00000006175/ENSSSCG00000033175/ENSSSCG00000016957	TNFAIP3/PRKCA/LY96/SASH1/CD180	5	3	ENSSSCG00000017268/ENSSSCG00000033175/ENSSSCG00000016957	2	ENSSSCG00000004154/ENSSSCG00000006175
BP	GO:0070233	negative regulation of T cell apoptotic process	5/1419	15/10877	0.036529278137476	0.511292812904993	ENSSSCG00000006530/ENSSSCG00000005096/ENSSSCG00000017705/ENSSSCG00000005240/ENSSSCG00000021255	EFNA1/HIF1A/CCL5/DOCK8/ADA	5	1	ENSSSCG00000005240	4	ENSSSCG00000006530/ENSSSCG00000005096/ENSSSCG00000017705/ENSSSCG00000021255
BP	GO:0090023	positive regulation of neutrophil chemotaxis	5/1419	15/10877	0.036529278137476	0.511292812904993	ENSSSCG00000012131/ENSSSCG00000017466/ENSSSCG00000008953/ENSSSCG00000008954/ENSSSCG00000008959	MOSPD2/CCR7/CXCL8/-/CXCL2	5	0		5	ENSSSCG00000012131/ENSSSCG00000017466/ENSSSCG00000008953/ENSSSCG00000008954/ENSSSCG00000008959
BP	GO:0099622	cardiac muscle cell membrane repolarization	5/1419	15/10877	0.036529278137476	0.511292812904993	ENSSSCG00000039947/ENSSSCG00000015402/ENSSSCG00000015310/ENSSSCG00000009125/ENSSSCG00000006344	KCNJ2/CACNA2D1/AKAP9/ANK2/NOS1AP	5	3	ENSSSCG00000039947/ENSSSCG00000009125/ENSSSCG00000006344	2	ENSSSCG00000015402/ENSSSCG00000015310
BP	GO:1902176	negative regulation of oxidative stress-induced intrinsic apoptotic signaling pathway	5/1419	15/10877	0.036529278137476	0.511292812904993	ENSSSCG00000005096/ENSSSCG00000027997/ENSSSCG00000010235/ENSSSCG00000040125/ENSSSCG00000004032	HIF1A/NME5/SIRT1/NOL3/PRKN	5	1	ENSSSCG00000004032	4	ENSSSCG00000005096/ENSSSCG00000027997/ENSSSCG00000010235/ENSSSCG00000040125
BP	GO:1903204	negative regulation of oxidative stress-induced neuron death	5/1419	15/10877	0.036529278137476	0.511292812904993	ENSSSCG00000005385/ENSSSCG00000005096/ENSSSCG00000004222/ENSSSCG00000006037/ENSSSCG00000004032	NR4A3/HIF1A/NCOA7/OXR1/PRKN	5	1	ENSSSCG00000004032	4	ENSSSCG00000005385/ENSSSCG00000005096/ENSSSCG00000004222/ENSSSCG00000006037
BP	GO:2000780	negative regulation of double-strand break repair	5/1419	15/10877	0.036529278137476	0.511292812904993	ENSSSCG00000021822/ENSSSCG00000027652/ENSSSCG00000024373/ENSSSCG00000016395/ENSSSCG00000012549	RNF169/KLHL15/TRIP12/RIF1/CXorf57	5	2	ENSSSCG00000021822/ENSSSCG00000024373	3	ENSSSCG00000027652/ENSSSCG00000016395/ENSSSCG00000012549
BP	GO:0070304	positive regulation of stress-activated protein kinase signaling cascade	18/1419	89/10877	0.0369967661984321	0.515176174965166	ENSSSCG00000022689/ENSSSCG00000033228/ENSSSCG00000015801/ENSSSCG00000012110/ENSSSCG00000035249/ENSSSCG00000004192/ENSSSCG00000016140/ENSSSCG00000007056/ENSSSCG00000011739/ENSSSCG00000004037/ENSSSCG00000035859/ENSSSCG00000014920/ENSSSCG00000038073/ENSSSCG00000008496/ENSSSCG00000033175/ENSSSCG00000026733/ENSSSCG00000005524/ENSSSCG00000004898	GADD45B/SPAG9/TLR3/MID1/GADD45G/CTGF/FZD5/PLCB1/PDCD10/MAP3K4/WNT5A/FZD4/NOD2/EIF2AK2/SASH1/HIPK2/DAB2IP/TNFRSF11A	18	11	ENSSSCG00000012110/ENSSSCG00000004192/ENSSSCG00000016140/ENSSSCG00000004037/ENSSSCG00000035859/ENSSSCG00000014920/ENSSSCG00000038073/ENSSSCG00000033175/ENSSSCG00000026733/ENSSSCG00000005524/ENSSSCG00000004898	7	ENSSSCG00000022689/ENSSSCG00000033228/ENSSSCG00000015801/ENSSSCG00000035249/ENSSSCG00000007056/ENSSSCG00000011739/ENSSSCG00000008496
BP	GO:0045930	negative regulation of mitotic cell cycle	27/1419	146/10877	0.0371429571888341	0.515176174965166	ENSSSCG00000011213/ENSSSCG00000031882/ENSSSCG00000016291/ENSSSCG00000016346/ENSSSCG00000006127/ENSSSCG00000016925/ENSSSCG00000004466/ENSSSCG00000021966/ENSSSCG00000009434/ENSSSCG00000035639/ENSSSCG00000009217/ENSSSCG00000012434/ENSSSCG00000039546/ENSSSCG00000017473/ENSSSCG00000001565/ENSSSCG00000039756/ENSSSCG00000005449/ENSSSCG00000015215/ENSSSCG00000013402/ENSSSCG00000015576/ENSSSCG00000027557/…	TOP2B/PNPT1/GIGYF2/MAD2L1BP/NBN/PLK2/TTK/TOPBP1/RGCC/NAE1/PKD2/ATRX/KNTC1/TOP2A/CDKN1A/FOXC1/PTPN3/CHEK1/USP47/TPR/CDC14B/PRKDC/RPL26/ATM/NOP53/TICRR/GPR132	27	9	ENSSSCG00000016291/ENSSSCG00000016346/ENSSSCG00000016925/ENSSSCG00000009217/ENSSSCG00000039756/ENSSSCG00000005449/ENSSSCG00000027557/ENSSSCG00000006274/ENSSSCG00000040355	18	ENSSSCG00000011213/ENSSSCG00000031882/ENSSSCG00000006127/ENSSSCG00000004466/ENSSSCG00000021966/ENSSSCG00000009434/ENSSSCG00000035639/ENSSSCG00000012434/ENSSSCG00000039546/ENSSSCG00000017473/ENSSSCG00000001565/ENSSSCG00000015215/ENSSSCG00000013402/ENSSSCG00000015576/ENSSSCG00000028850/ENSSSCG00000025606/ENSSSCG00000022774/ENSSSCG00000036892
BP	GO:0061458	reproductive system development	42/1419	245/10877	0.0372004294946417	0.515176174965166	ENSSSCG00000005096/ENSSSCG00000032613/ENSSSCG00000038125/ENSSSCG00000011510/ENSSSCG00000006646/ENSSSCG00000005382/ENSSSCG00000027646/ENSSSCG00000002254/ENSSSCG00000038677/ENSSSCG00000021597/ENSSSCG00000009217/ENSSSCG00000010928/ENSSSCG00000012434/ENSSSCG00000012026/ENSSSCG00000039756/ENSSSCG00000016140/ENSSSCG00000016842/ENSSSCG00000004387/ENSSSCG00000030820/ENSSSCG00000000252/ENSSSCG00000012967/…	HIF1A/SNAI1/NUP210L/TMF1/ARNT/TGFBR1/TIPARP/NR2F2/GJB3/PHLDA2/PKD2/KDM5B/ATRX/ADAMTS1/FOXC1/FZD5/NIPBL/FOXO3/STK4/KRT8/FOSL1/SEMA3A/MAP3K4/WNT5A/FZD4/ARID4A/LRP2/RBPJ/EGFR/SIRT1/ATM/GJB5/CHD7/-/TAF4/ARID1A/IRX5/ADA/SALL1/VGF/KIF18A/ZP3	42	19	ENSSSCG00000006646/ENSSSCG00000002254/ENSSSCG00000009217/ENSSSCG00000010928/ENSSSCG00000012026/ENSSSCG00000039756/ENSSSCG00000016140/ENSSSCG00000004387/ENSSSCG00000030820/ENSSSCG00000004037/ENSSSCG00000035859/ENSSSCG00000014920/ENSSSCG00000040746/ENSSSCG00000022126/ENSSSCG00000006231/ENSSSCG00000024694/ENSSSCG00000003559/ENSSSCG00000032145/ENSSSCG00000002836	23	ENSSSCG00000005096/ENSSSCG00000032613/ENSSSCG00000038125/ENSSSCG00000011510/ENSSSCG00000005382/ENSSSCG00000027646/ENSSSCG00000038677/ENSSSCG00000021597/ENSSSCG00000012434/ENSSSCG00000016842/ENSSSCG00000000252/ENSSSCG00000012967/ENSSSCG00000015398/ENSSSCG00000005073/ENSSSCG00000022155/ENSSSCG00000010235/ENSSSCG00000025606/ENSSSCG00000003585/ENSSSCG00000023195/ENSSSCG00000021255/ENSSSCG00000039053/…
BP	GO:0048644	muscle organ morphogenesis	12/1419	53/10877	0.0373923411232308	0.515176174965166	ENSSSCG00000005382/ENSSSCG00000004755/ENSSSCG00000010360/ENSSSCG00000039756/ENSSSCG00000035859/ENSSSCG00000025334/ENSSSCG00000011867/ENSSSCG00000040746/ENSSSCG00000022155/ENSSSCG00000011859/ENSSSCG00000006231/ENSSSCG00000011441	TGFBR1/DLL4/BMPR1A/FOXC1/WNT5A/POU4F1/MYLK/LRP2/RBPJ/HEG1/CHD7/TNNC1	12	7	ENSSSCG00000039756/ENSSSCG00000035859/ENSSSCG00000025334/ENSSSCG00000011867/ENSSSCG00000040746/ENSSSCG00000011859/ENSSSCG00000006231	5	ENSSSCG00000005382/ENSSSCG00000004755/ENSSSCG00000010360/ENSSSCG00000022155/ENSSSCG00000011441
BP	GO:0071480	cellular response to gamma radiation	6/1419	20/10877	0.0373965760164776	0.515176174965166	ENSSSCG00000001565/ENSSSCG00000011679/ENSSSCG00000014336/ENSSSCG00000028850/ENSSSCG00000024019/ENSSSCG00000025606	CDKN1A/ATR/EGR1/RPL26/-/ATM	6	1	ENSSSCG00000014336	5	ENSSSCG00000001565/ENSSSCG00000011679/ENSSSCG00000028850/ENSSSCG00000024019/ENSSSCG00000025606
BP	GO:0030307	positive regulation of cell growth	17/1419	83/10877	0.0375682335366158	0.515913446083022	ENSSSCG00000012252/ENSSSCG00000004595/ENSSSCG00000005382/ENSSSCG00000038443/ENSSSCG00000023165/ENSSSCG00000013402/ENSSSCG00000022126/ENSSSCG00000027130/ENSSSCG00000011243/ENSSSCG00000003654/ENSSSCG00000005925/ENSSSCG00000000948/ENSSSCG00000013880/ENSSSCG00000004032/ENSSSCG00000022200/ENSSSCG00000012156/ENSSSCG00000025784	DDX3X/ADAM10/TGFBR1/ZNF639/SEMA7A/USP47/EGFR/TNFRSF12A/GOLGA4/MACF1/EXOSC4/SYT1/UNC13A/PRKN/SYT17/CDKL5/CDH4	17	8	ENSSSCG00000022126/ENSSSCG00000003654/ENSSSCG00000000948/ENSSSCG00000013880/ENSSSCG00000004032/ENSSSCG00000022200/ENSSSCG00000012156/ENSSSCG00000025784	9	ENSSSCG00000012252/ENSSSCG00000004595/ENSSSCG00000005382/ENSSSCG00000038443/ENSSSCG00000023165/ENSSSCG00000013402/ENSSSCG00000027130/ENSSSCG00000011243/ENSSSCG00000005925
BP	GO:0045814	negative regulation of gene expression, epigenetic	13/1419	59/10877	0.0380316333012661	0.517560681591181	ENSSSCG00000009047/ENSSSCG00000008080/ENSSSCG00000031159/ENSSSCG00000015952/ENSSSCG00000030423/ENSSSCG00000004432/ENSSSCG00000016395/ENSSSCG00000036080/ENSSSCG00000008591/ENSSSCG00000001880/ENSSSCG00000010235/ENSSSCG00000003559/ENSSSCG00000038953	SMARCA5/PHF2/BEND3/HAT1/MIER1/HDAC2/RIF1/-/ATAD2B/SIN3A/SIRT1/ARID1A/UBE2B	13	4	ENSSSCG00000008080/ENSSSCG00000031159/ENSSSCG00000001880/ENSSSCG00000003559	9	ENSSSCG00000009047/ENSSSCG00000015952/ENSSSCG00000030423/ENSSSCG00000004432/ENSSSCG00000016395/ENSSSCG00000036080/ENSSSCG00000008591/ENSSSCG00000010235/ENSSSCG00000038953
BP	GO:0034660	ncRNA metabolic process	53/1419	320/10877	0.038160422132142	0.517560681591181	ENSSSCG00000006727/ENSSSCG00000016911/ENSSSCG00000031882/ENSSSCG00000015602/ENSSSCG00000006078/ENSSSCG00000022225/ENSSSCG00000008098/ENSSSCG00000030957/ENSSSCG00000014168/ENSSSCG00000004711/ENSSSCG00000008990/ENSSSCG00000028225/ENSSSCG00000009384/ENSSSCG00000001024/ENSSSCG00000034572/ENSSSCG00000002706/ENSSSCG00000021466/ENSSSCG00000001080/ENSSSCG00000005097/ENSSSCG00000034494/ENSSSCG00000005441/…	WDR3/SKIV2L2/PNPT1/INTS7/POP1/NOP58/POLR1B/NFKB1/ELL2/LCMT2/MRPL1/DICER1/INTS6/RIOK1/MPHOSPH6/ADAT1/BMT2/CDKAL1/SNAPC1/MARS2/-/TRNT1/RPS21/TYW5/EMG1/RPS27/TRDMT1/HEATR1/TYW3/RPS16/-/ZC3H8/RPL35/FDXACB1/ANG/RPL26/NOL8/-/DDX52/NOP53/OSGEPL1/ICE2/RPS19/PUS3/EXOSC4/-/RTRAF/WDR36/EXOSC8/DROSHA/DUS4L/TRMT10C/DIS3L	53	16	ENSSSCG00000006727/ENSSSCG00000015602/ENSSSCG00000006078/ENSSSCG00000008098/ENSSSCG00000030957/ENSSSCG00000004711/ENSSSCG00000028225/ENSSSCG00000001024/ENSSSCG00000002706/ENSSSCG00000034494/ENSSSCG00000005441/ENSSSCG00000010145/ENSSSCG00000021871/ENSSSCG00000024479/ENSSSCG00000016809/ENSSSCG00000004941	37	ENSSSCG00000016911/ENSSSCG00000031882/ENSSSCG00000022225/ENSSSCG00000014168/ENSSSCG00000008990/ENSSSCG00000009384/ENSSSCG00000034572/ENSSSCG00000021466/ENSSSCG00000001080/ENSSSCG00000005097/ENSSSCG00000011529/ENSSSCG00000002529/ENSSSCG00000016087/ENSSSCG00000026812/ENSSSCG00000031838/ENSSSCG00000021309/ENSSSCG00000003779/ENSSSCG00000020817/ENSSSCG00000003930/ENSSSCG00000008099/ENSSSCG00000034227/…
BP	GO:0007173	epidermal growth factor receptor signaling pathway	15/1419	71/10877	0.0382622092335897	0.517560681591181	ENSSSCG00000032434/ENSSSCG00000038185/ENSSSCG00000001483/ENSSSCG00000032332/ENSSSCG00000027074/ENSSSCG00000023709/ENSSSCG00000003731/ENSSSCG00000037719/ENSSSCG00000007700/ENSSSCG00000015115/ENSSSCG00000022126/ENSSSCG00000036568/ENSSSCG00000010603/ENSSSCG00000008122/ENSSSCG00000000634	PLAUR/EREG/FAM83B/SOCS4/FER/PTPRJ/GAREM1/PDPK1/HIP1/CBL/EGFR/MVB12A/NEURL1/ADRA2B/STYK1	15	9	ENSSSCG00000023709/ENSSSCG00000003731/ENSSSCG00000037719/ENSSSCG00000007700/ENSSSCG00000015115/ENSSSCG00000022126/ENSSSCG00000010603/ENSSSCG00000008122/ENSSSCG00000000634	6	ENSSSCG00000032434/ENSSSCG00000038185/ENSSSCG00000001483/ENSSSCG00000032332/ENSSSCG00000027074/ENSSSCG00000036568
BP	GO:0035335	peptidyl-tyrosine dephosphorylation	15/1419	71/10877	0.0382622092335897	0.517560681591181	ENSSSCG00000037910/ENSSSCG00000032097/ENSSSCG00000040815/ENSSSCG00000015582/ENSSSCG00000023709/ENSSSCG00000012742/ENSSSCG00000017642/ENSSSCG00000005449/ENSSSCG00000003580/ENSSSCG00000009943/ENSSSCG00000027557/ENSSSCG00000010440/ENSSSCG00000000504/ENSSSCG00000015136/ENSSSCG00000002425	DUSP6/DUSP16/DUSP5/PTPN14/PTPRJ/MTM1/MTMR4/PTPN3/EYA3/SSH1/CDC14B/-/PTPRB/UBASH3B/PTPN21	15	13	ENSSSCG00000037910/ENSSSCG00000032097/ENSSSCG00000015582/ENSSSCG00000023709/ENSSSCG00000012742/ENSSSCG00000017642/ENSSSCG00000005449/ENSSSCG00000003580/ENSSSCG00000009943/ENSSSCG00000027557/ENSSSCG00000000504/ENSSSCG00000015136/ENSSSCG00000002425	2	ENSSSCG00000040815/ENSSSCG00000010440
BP	GO:0007249	I-kappaB kinase/NF-kappaB signaling	32/1419	179/10877	0.0382807648623658	0.517560681591181	ENSSSCG00000001952/ENSSSCG00000006084/ENSSSCG00000035355/ENSSSCG00000006663/ENSSSCG00000015801/ENSSSCG00000016925/ENSSSCG00000010563/ENSSSCG00000035746/ENSSSCG00000021068/ENSSSCG00000021893/ENSSSCG00000002917/ENSSSCG00000004154/ENSSSCG00000026940/ENSSSCG00000037719/ENSSSCG00000017330/ENSSSCG00000030423/ENSSSCG00000024592/ENSSSCG00000032857/ENSSSCG00000000579/ENSSSCG00000010548/ENSSSCG00000038073/…	NFKBIA/MTDH/F2R/OTUD7B/TLR3/PLK2/BTRC/ECT2/TRAF5/ROCK1/NFKBID/TNFAIP3/CASP10/PDPK1/MAP3K14/MIER1/ANKRD17/S100A12/GOLT1B/CHUK/NOD2/LGALS1/EEF1D/SIRT1/FBXW11/ERC1/S100A13/NOL3/DAB2IP/PRKN/IFIT5/BRD4	32	14	ENSSSCG00000035355/ENSSSCG00000006663/ENSSSCG00000016925/ENSSSCG00000010563/ENSSSCG00000021068/ENSSSCG00000026940/ENSSSCG00000037719/ENSSSCG00000024592/ENSSSCG00000038073/ENSSSCG00000023307/ENSSSCG00000000755/ENSSSCG00000005524/ENSSSCG00000004032/ENSSSCG00000022227	18	ENSSSCG00000001952/ENSSSCG00000006084/ENSSSCG00000015801/ENSSSCG00000035746/ENSSSCG00000021893/ENSSSCG00000002917/ENSSSCG00000004154/ENSSSCG00000017330/ENSSSCG00000030423/ENSSSCG00000032857/ENSSSCG00000000579/ENSSSCG00000010548/ENSSSCG00000033854/ENSSSCG00000006954/ENSSSCG00000010235/ENSSSCG00000038991/ENSSSCG00000040125/ENSSSCG00000010454
BP	GO:0034599	cellular response to oxidative stress	26/1419	140/10877	0.0384527540420063	0.518281410189634	ENSSSCG00000005385/ENSSSCG00000005096/ENSSSCG00000031882/ENSSSCG00000006646/ENSSSCG00000002383/ENSSSCG00000010949/ENSSSCG00000004222/ENSSSCG00000024351/ENSSSCG00000035746/ENSSSCG00000027074/ENSSSCG00000025910/ENSSSCG00000006037/ENSSSCG00000004154/ENSSSCG00000004387/ENSSSCG00000000754/ENSSSCG00000011739/ENSSSCG00000007360/ENSSSCG00000005453/ENSSSCG00000027997/ENSSSCG00000010548/ENSSSCG00000022126/…	NR4A3/HIF1A/PNPT1/ARNT/FOS/DAPK1/NCOA7/MET/ECT2/FER/ZNF277/OXR1/TNFAIP3/FOXO3/RAD52/PDCD10/CHD6/-/NME5/CHUK/EGFR/CCS/SIRT1/NOL3/FANCC/PRKN	26	9	ENSSSCG00000006646/ENSSSCG00000002383/ENSSSCG00000010949/ENSSSCG00000004387/ENSSSCG00000000754/ENSSSCG00000007360/ENSSSCG00000022126/ENSSSCG00000033654/ENSSSCG00000004032	17	ENSSSCG00000005385/ENSSSCG00000005096/ENSSSCG00000031882/ENSSSCG00000004222/ENSSSCG00000024351/ENSSSCG00000035746/ENSSSCG00000027074/ENSSSCG00000025910/ENSSSCG00000006037/ENSSSCG00000004154/ENSSSCG00000011739/ENSSSCG00000005453/ENSSSCG00000027997/ENSSSCG00000010548/ENSSSCG00000012934/ENSSSCG00000010235/ENSSSCG00000040125
BP	GO:0009617	response to bacterium	41/1419	239/10877	0.038771522465716	0.520969964947021	ENSSSCG00000001952/ENSSSCG00000006084/ENSSSCG00000035355/ENSSSCG00000017705/ENSSSCG00000011510/ENSSSCG00000016929/ENSSSCG00000016954/ENSSSCG00000030957/ENSSSCG00000024596/ENSSSCG00000027074/ENSSSCG00000005305/ENSSSCG00000029385/ENSSSCG00000039548/ENSSSCG00000017466/ENSSSCG00000016140/ENSSSCG00000004154/ENSSSCG00000040575/ENSSSCG00000002749/ENSSSCG00000017268/ENSSSCG00000008953/ENSSSCG00000008954/…	NFKBIA/MTDH/F2R/CCL5/TMF1/PDE4D/ERBIN/NFKB1/NOCT/FER/UNC13B/LIAS/PTGFR/CCR7/FZD5/TNFAIP3/ISG15/-/PRKCA/CXCL8/-/ANKRD17/CYBA/WNT5A/-/CXCL2/PRKD1/RBPJ/NOD2/PDCD4/LY96/SASH1/RPS19/PLAC8/DAB2IP/DROSHA/PALM3/PDE4B/TNFRSF11A/BPIFA1/CD180	41	16	ENSSSCG00000035355/ENSSSCG00000030957/ENSSSCG00000005305/ENSSSCG00000016140/ENSSSCG00000002749/ENSSSCG00000017268/ENSSSCG00000024592/ENSSSCG00000035859/ENSSSCG00000001975/ENSSSCG00000038073/ENSSSCG00000033175/ENSSSCG00000005524/ENSSSCG00000016809/ENSSSCG00000013767/ENSSSCG00000004898/ENSSSCG00000016957	25	ENSSSCG00000001952/ENSSSCG00000006084/ENSSSCG00000017705/ENSSSCG00000011510/ENSSSCG00000016929/ENSSSCG00000016954/ENSSSCG00000024596/ENSSSCG00000027074/ENSSSCG00000029385/ENSSSCG00000039548/ENSSSCG00000017466/ENSSSCG00000004154/ENSSSCG00000040575/ENSSSCG00000008953/ENSSSCG00000008954/ENSSSCG00000031493/ENSSSCG00000007216/ENSSSCG00000008959/ENSSSCG00000022155/ENSSSCG00000010627/ENSSSCG00000006175/…
BP	GO:1901361	organic cyclic compound catabolic process	38/1419	219/10877	0.0389381197448212	0.521108290926333	ENSSSCG00000006752/ENSSSCG00000024411/ENSSSCG00000016911/ENSSSCG00000031882/ENSSSCG00000008452/ENSSSCG00000006033/ENSSSCG00000016929/ENSSSCG00000006078/ENSSSCG00000021586/ENSSSCG00000024596/ENSSSCG00000006983/ENSSSCG00000028225/ENSSSCG00000021354/ENSSSCG00000034373/ENSSSCG00000014187/ENSSSCG00000026568/ENSSSCG00000012727/ENSSSCG00000010240/ENSSSCG00000000078/ENSSSCG00000030388/ENSSSCG00000011117/…	CSDE1/-/SKIV2L2/PNPT1/LRPPRC/EIF3E/PDE4D/POP1/ZHX2/NOCT/CNOT7/DICER1/CNOT4/TNRC6C/NUDT12/DNPH1/FMR1/DNA2/TNRC6B/UPP1/-/ATM/TATDN1/RNASEH2C/NT5C/LSM3/EXOSC4/EXOSC8/-/DROSHA/ADA/APOE/PDE4B/PRODH2/DNASE1L2/CIDEA/DIS3L/AKR1D1	38	11	ENSSSCG00000024411/ENSSSCG00000006078/ENSSSCG00000021586/ENSSSCG00000028225/ENSSSCG00000021354/ENSSSCG00000034373/ENSSSCG00000000078/ENSSSCG00000016809/ENSSSCG00000024587/ENSSSCG00000004941/ENSSSCG00000016519	27	ENSSSCG00000006752/ENSSSCG00000016911/ENSSSCG00000031882/ENSSSCG00000008452/ENSSSCG00000006033/ENSSSCG00000016929/ENSSSCG00000024596/ENSSSCG00000006983/ENSSSCG00000014187/ENSSSCG00000026568/ENSSSCG00000012727/ENSSSCG00000010240/ENSSSCG00000030388/ENSSSCG00000011117/ENSSSCG00000025606/ENSSSCG00000030603/ENSSSCG00000012979/ENSSSCG00000028210/ENSSSCG00000011601/ENSSSCG00000005925/ENSSSCG00000009358/…
BP	GO:0017148	negative regulation of translation	20/1419	102/10877	0.0390204742690431	0.521108290926333	ENSSSCG00000012252/ENSSSCG00000016291/ENSSSCG00000011769/ENSSSCG00000010949/ENSSSCG00000038410/ENSSSCG00000006983/ENSSSCG00000010030/ENSSSCG00000028225/ENSSSCG00000034373/ENSSSCG00000012727/ENSSSCG00000000078/ENSSSCG00000015576/ENSSSCG00000028420/ENSSSCG00000008496/ENSSSCG00000022126/ENSSSCG00000003591/ENSSSCG00000011313/ENSSSCG00000017069/ENSSSCG00000016809/ENSSSCG00000018039	DDX3X/GIGYF2/FXR1/DAPK1/CPEB2/CNOT7/EIF4ENIF1/DICER1/TNRC6C/FMR1/TNRC6B/TPR/EIF4E/EIF2AK2/EGFR/PUM1/LIMD1/LARP1/DROSHA/NCOR1	20	12	ENSSSCG00000016291/ENSSSCG00000010949/ENSSSCG00000010030/ENSSSCG00000028225/ENSSSCG00000034373/ENSSSCG00000000078/ENSSSCG00000022126/ENSSSCG00000003591/ENSSSCG00000011313/ENSSSCG00000017069/ENSSSCG00000016809/ENSSSCG00000018039	8	ENSSSCG00000012252/ENSSSCG00000011769/ENSSSCG00000038410/ENSSSCG00000006983/ENSSSCG00000012727/ENSSSCG00000015576/ENSSSCG00000028420/ENSSSCG00000008496
BP	GO:0001666	response to hypoxia	23/1419	121/10877	0.0391478715041818	0.521215716032811	ENSSSCG00000010312/ENSSSCG00000005096/ENSSSCG00000006496/ENSSSCG00000003928/ENSSSCG00000031888/ENSSSCG00000006646/ENSSSCG00000038410/ENSSSCG00000009434/ENSSSCG00000011689/ENSSSCG00000014336/ENSSSCG00000017513/ENSSSCG00000022155/ENSSSCG00000012181/ENSSSCG00000011313/ENSSSCG00000040513/ENSSSCG00000010235/ENSSSCG00000031538/ENSSSCG00000040125/ENSSSCG00000013033/ENSSSCG00000022774/ENSSSCG00000000068/…	PLAU/HIF1A/LMNA/PLK3/DDIT4/ARNT/CPEB2/RGCC/PLOD2/EGR1/NPEPPS/RBPJ/PDK3/LIMD1/AQP3/SIRT1/ANG/NOL3/BAD/NOP53/EP300/ADA/CBFA2T3	23	7	ENSSSCG00000006646/ENSSSCG00000014336/ENSSSCG00000017513/ENSSSCG00000012181/ENSSSCG00000011313/ENSSSCG00000000068/ENSSSCG00000002648	16	ENSSSCG00000010312/ENSSSCG00000005096/ENSSSCG00000006496/ENSSSCG00000003928/ENSSSCG00000031888/ENSSSCG00000038410/ENSSSCG00000009434/ENSSSCG00000011689/ENSSSCG00000022155/ENSSSCG00000040513/ENSSSCG00000010235/ENSSSCG00000031538/ENSSSCG00000040125/ENSSSCG00000013033/ENSSSCG00000022774/ENSSSCG00000021255
BP	GO:0001649	osteoblast differentiation	25/1419	134/10877	0.0397877273215177	0.525227224395944	ENSSSCG00000036893/ENSSSCG00000016916/ENSSSCG00000023303/ENSSSCG00000032566/ENSSSCG00000032613/ENSSSCG00000002344/ENSSSCG00000004339/ENSSSCG00000007520/ENSSSCG00000011733/ENSSSCG00000015874/ENSSSCG00000024596/ENSSSCG00000010360/ENSSSCG00000011628/ENSSSCG00000015485/ENSSSCG00000022869/ENSSSCG00000023165/ENSSSCG00000014319/ENSSSCG00000015507/ENSSSCG00000014136/ENSSSCG00000001975/ENSSSCG00000011313/…	PTHLH/IL6ST/FIGNL1/ZHX3/SNAI1/RIOX1/UFL1/GNAS/-/ACVR1/NOCT/BMPR1A/DNAJC13/SUCO/BCAP29/SEMA7A/SMAD5/TNN/VCAN/PRKD1/LIMD1/FBN2/HDAC4/CYP24A1/CTHRC1	25	11	ENSSSCG00000023303/ENSSSCG00000032566/ENSSSCG00000002344/ENSSSCG00000007520/ENSSSCG00000015874/ENSSSCG00000015507/ENSSSCG00000001975/ENSSSCG00000011313/ENSSSCG00000014256/ENSSSCG00000024777/ENSSSCG00000007486	14	ENSSSCG00000036893/ENSSSCG00000016916/ENSSSCG00000032613/ENSSSCG00000004339/ENSSSCG00000011733/ENSSSCG00000024596/ENSSSCG00000010360/ENSSSCG00000011628/ENSSSCG00000015485/ENSSSCG00000022869/ENSSSCG00000023165/ENSSSCG00000014319/ENSSSCG00000014136/ENSSSCG00000006051
BP	GO:0051297	centrosome organization	19/1419	96/10877	0.0399557773539954	0.525227224395944	ENSSSCG00000014934/ENSSSCG00000016925/ENSSSCG00000006994/ENSSSCG00000010471/ENSSSCG00000009077/ENSSSCG00000028821/ENSSSCG00000005173/ENSSSCG00000028228/ENSSSCG00000014283/ENSSSCG00000004893/ENSSSCG00000024663/ENSSSCG00000017890/ENSSSCG00000006108/ENSSSCG00000021138/ENSSSCG00000022283/ENSSSCG00000004582/ENSSSCG00000014943/ENSSSCG00000023829/ENSSSCG00000014239	CHORDC1/PLK2/PCM1/KIF11/HSPA4L/SASS6/HAUS6/XPO1/KIF3A/VPS4B/SPICE1/KIAA0753/TMEM67/CEP250/CEP135/BNIP2/DEUP1/CCP110/CEP120	19	4	ENSSSCG00000016925/ENSSSCG00000024663/ENSSSCG00000017890/ENSSSCG00000021138	15	ENSSSCG00000014934/ENSSSCG00000006994/ENSSSCG00000010471/ENSSSCG00000009077/ENSSSCG00000028821/ENSSSCG00000005173/ENSSSCG00000028228/ENSSSCG00000014283/ENSSSCG00000004893/ENSSSCG00000006108/ENSSSCG00000022283/ENSSSCG00000004582/ENSSSCG00000014943/ENSSSCG00000023829/ENSSSCG00000014239
BP	GO:0045927	positive regulation of growth	27/1419	147/10877	0.0400582288148081	0.525227224395944	ENSSSCG00000012252/ENSSSCG00000011680/ENSSSCG00000004595/ENSSSCG00000013125/ENSSSCG00000005382/ENSSSCG00000010360/ENSSSCG00000012742/ENSSSCG00000016842/ENSSSCG00000007056/ENSSSCG00000038443/ENSSSCG00000023165/ENSSSCG00000013402/ENSSSCG00000037449/ENSSSCG00000022155/ENSSSCG00000022126/ENSSSCG00000006231/ENSSSCG00000027130/ENSSSCG00000011243/ENSSSCG00000003654/ENSSSCG00000005925/ENSSSCG00000000948/…	DDX3X/PLS1/ADAM10/OSBP/TGFBR1/BMPR1A/MTM1/NIPBL/PLCB1/ZNF639/SEMA7A/USP47/CSF1/RBPJ/EGFR/CHD7/TNFRSF12A/GOLGA4/MACF1/EXOSC4/SYT1/UNC13A/PRKN/SYT17/CDKL5/CDH4/ZP3	27	11	ENSSSCG00000013125/ENSSSCG00000012742/ENSSSCG00000022126/ENSSSCG00000006231/ENSSSCG00000003654/ENSSSCG00000000948/ENSSSCG00000013880/ENSSSCG00000004032/ENSSSCG00000022200/ENSSSCG00000012156/ENSSSCG00000025784	16	ENSSSCG00000012252/ENSSSCG00000011680/ENSSSCG00000004595/ENSSSCG00000005382/ENSSSCG00000010360/ENSSSCG00000016842/ENSSSCG00000007056/ENSSSCG00000038443/ENSSSCG00000023165/ENSSSCG00000013402/ENSSSCG00000037449/ENSSSCG00000022155/ENSSSCG00000027130/ENSSSCG00000011243/ENSSSCG00000005925/ENSSSCG00000007691
BP	GO:0001756	somitogenesis	10/1419	42/10877	0.0401890356191091	0.525227224395944	ENSSSCG00000010360/ENSSSCG00000039756/ENSSSCG00000023784/ENSSSCG00000035859/ENSSSCG00000006274/ENSSSCG00000022155/ENSSSCG00000025606/ENSSSCG00000000068/ENSSSCG00000005844/ENSSSCG00000017982	BMPR1A/FOXC1/SEMA3C/WNT5A/PRKDC/RBPJ/ATM/EP300/NRARP/HES7	10	4	ENSSSCG00000039756/ENSSSCG00000035859/ENSSSCG00000006274/ENSSSCG00000000068	6	ENSSSCG00000010360/ENSSSCG00000023784/ENSSSCG00000022155/ENSSSCG00000025606/ENSSSCG00000005844/ENSSSCG00000017982
BP	GO:0007098	centrosome cycle	18/1419	90/10877	0.0408224379598847	0.525227224395944	ENSSSCG00000014934/ENSSSCG00000016925/ENSSSCG00000006994/ENSSSCG00000010471/ENSSSCG00000009077/ENSSSCG00000028821/ENSSSCG00000005173/ENSSSCG00000028228/ENSSSCG00000004893/ENSSSCG00000024663/ENSSSCG00000017890/ENSSSCG00000006108/ENSSSCG00000021138/ENSSSCG00000022283/ENSSSCG00000004582/ENSSSCG00000014943/ENSSSCG00000023829/ENSSSCG00000014239	CHORDC1/PLK2/PCM1/KIF11/HSPA4L/SASS6/HAUS6/XPO1/VPS4B/SPICE1/KIAA0753/TMEM67/CEP250/CEP135/BNIP2/DEUP1/CCP110/CEP120	18	4	ENSSSCG00000016925/ENSSSCG00000024663/ENSSSCG00000017890/ENSSSCG00000021138	14	ENSSSCG00000014934/ENSSSCG00000006994/ENSSSCG00000010471/ENSSSCG00000009077/ENSSSCG00000028821/ENSSSCG00000005173/ENSSSCG00000028228/ENSSSCG00000004893/ENSSSCG00000006108/ENSSSCG00000022283/ENSSSCG00000004582/ENSSSCG00000014943/ENSSSCG00000023829/ENSSSCG00000014239
BP	GO:0007389	pattern specification process	45/1419	267/10877	0.041100646871312	0.525227224395944	ENSSSCG00000010224/ENSSSCG00000038948/ENSSSCG00000005096/ENSSSCG00000032613/ENSSSCG00000009083/ENSSSCG00000040751/ENSSSCG00000005382/ENSSSCG00000004755/ENSSSCG00000016073/ENSSSCG00000015874/ENSSSCG00000002254/ENSSSCG00000009217/ENSSSCG00000010360/ENSSSCG00000004601/ENSSSCG00000039756/ENSSSCG00000016140/ENSSSCG00000023784/ENSSSCG00000004589/ENSSSCG00000011081/ENSSSCG00000014283/ENSSSCG00000004825/…	EGR2/ETS2/HIF1A/SNAI1/SPRY1/DDIT3/TGFBR1/DLL4/PGAP1/ACVR1/NR2F2/PKD2/BMPR1A/MNS1/FOXC1/FZD5/SEMA3C/RNF111/-/KIF3A/CHSY1/SP8/HOXD4/DYNC2LI1/SEMA3A/KMT2A/WNT5A/HOXD3/AHI1/PRKDC/GPR161/LRP2/RBPJ/CYP26B1/IFT74/ATM/CCDC39/EP300/HIPK2/NRARP/INTU/GORAB/DCHS1/TBC1D32/HES7	45	21	ENSSSCG00000010224/ENSSSCG00000009083/ENSSSCG00000015874/ENSSSCG00000002254/ENSSSCG00000009217/ENSSSCG00000039756/ENSSSCG00000016140/ENSSSCG00000004589/ENSSSCG00000004825/ENSSSCG00000031078/ENSSSCG00000015984/ENSSSCG00000023324/ENSSSCG00000035859/ENSSSCG00000015985/ENSSSCG00000006274/ENSSSCG00000006302/ENSSSCG00000040746/ENSSSCG00000008311/ENSSSCG00000000068/ENSSSCG00000026733/ENSSSCG00000029189	24	ENSSSCG00000038948/ENSSSCG00000005096/ENSSSCG00000032613/ENSSSCG00000040751/ENSSSCG00000005382/ENSSSCG00000004755/ENSSSCG00000016073/ENSSSCG00000010360/ENSSSCG00000004601/ENSSSCG00000023784/ENSSSCG00000011081/ENSSSCG00000014283/ENSSSCG00000038383/ENSSSCG00000015398/ENSSSCG00000004166/ENSSSCG00000022155/ENSSSCG00000005124/ENSSSCG00000025606/ENSSSCG00000011768/ENSSSCG00000005844/ENSSSCG00000009079/…
BP	GO:1902750	negative regulation of cell cycle G2/M phase transition	8/1419	31/10877	0.0411646986312878	0.525227224395944	ENSSSCG00000006127/ENSSSCG00000021966/ENSSSCG00000035639/ENSSSCG00000013402/ENSSSCG00000025606/ENSSSCG00000022774/ENSSSCG00000040355/ENSSSCG00000036892	NBN/TOPBP1/NAE1/USP47/ATM/NOP53/TICRR/GPR132	8	1	ENSSSCG00000040355	7	ENSSSCG00000006127/ENSSSCG00000021966/ENSSSCG00000035639/ENSSSCG00000013402/ENSSSCG00000025606/ENSSSCG00000022774/ENSSSCG00000036892
BP	GO:0032496	response to lipopolysaccharide	26/1419	141/10877	0.0415183137098121	0.525227224395944	ENSSSCG00000001952/ENSSSCG00000006084/ENSSSCG00000035355/ENSSSCG00000017705/ENSSSCG00000016929/ENSSSCG00000016954/ENSSSCG00000030957/ENSSSCG00000024596/ENSSSCG00000027074/ENSSSCG00000029385/ENSSSCG00000039548/ENSSSCG00000017466/ENSSSCG00000004154/ENSSSCG00000017268/ENSSSCG00000008953/ENSSSCG00000008954/ENSSSCG00000035859/ENSSSCG00000008959/ENSSSCG00000010627/ENSSSCG00000006175/ENSSSCG00000033175/…	NFKBIA/MTDH/F2R/CCL5/PDE4D/ERBIN/NFKB1/NOCT/FER/LIAS/PTGFR/CCR7/TNFAIP3/PRKCA/CXCL8/-/WNT5A/CXCL2/PDCD4/LY96/SASH1/DAB2IP/PALM3/PDE4B/TNFRSF11A/CD180	26	9	ENSSSCG00000035355/ENSSSCG00000030957/ENSSSCG00000017268/ENSSSCG00000035859/ENSSSCG00000033175/ENSSSCG00000005524/ENSSSCG00000013767/ENSSSCG00000004898/ENSSSCG00000016957	17	ENSSSCG00000001952/ENSSSCG00000006084/ENSSSCG00000017705/ENSSSCG00000016929/ENSSSCG00000016954/ENSSSCG00000024596/ENSSSCG00000027074/ENSSSCG00000029385/ENSSSCG00000039548/ENSSSCG00000017466/ENSSSCG00000004154/ENSSSCG00000008953/ENSSSCG00000008954/ENSSSCG00000008959/ENSSSCG00000010627/ENSSSCG00000006175/ENSSSCG00000003805
BP	GO:0050727	regulation of inflammatory response	28/1419	154/10877	0.0415661961195374	0.525227224395944	ENSSSCG00000001952/ENSSSCG00000015801/ENSSSCG00000036828/ENSSSCG00000003582/ENSSSCG00000030957/ENSSSCG00000005267/ENSSSCG00000017466/ENSSSCG00000004154/ENSSSCG00000029615/ENSSSCG00000009671/ENSSSCG00000030486/ENSSSCG00000000006/ENSSSCG00000023165/ENSSSCG00000035859/ENSSSCG00000038073/ENSSSCG00000016853/ENSSSCG00000010627/ENSSSCG00000003042/ENSSSCG00000022820/ENSSSCG00000016809/ENSSSCG00000021255/…	NFKBIA/TLR3/SNX4/SMPDL3B/NFKB1/ANXA1/CCR7/TNFAIP3/VAMP7/PBK/TBC1D23/PPARA/SEMA7A/WNT5A/NOD2/RICTOR/PDCD4/RPS19/VAMP8/DROSHA/ADA/-/ADORA2A/APOE/TNFRSF11A/ZP3/JAK2/BRD4	28	7	ENSSSCG00000030957/ENSSSCG00000000006/ENSSSCG00000035859/ENSSSCG00000038073/ENSSSCG00000016809/ENSSSCG00000004898/ENSSSCG00000022227	21	ENSSSCG00000001952/ENSSSCG00000015801/ENSSSCG00000036828/ENSSSCG00000003582/ENSSSCG00000005267/ENSSSCG00000017466/ENSSSCG00000004154/ENSSSCG00000029615/ENSSSCG00000009671/ENSSSCG00000030486/ENSSSCG00000023165/ENSSSCG00000016853/ENSSSCG00000010627/ENSSSCG00000003042/ENSSSCG00000022820/ENSSSCG00000021255/ENSSSCG00000014997/ENSSSCG00000010054/ENSSSCG00000003088/ENSSSCG00000007691/ENSSSCG00000005215
BP	GO:0010594	regulation of endothelial cell migration	17/1419	84/10877	0.0415955858031937	0.525227224395944	ENSSSCG00000006530/ENSSSCG00000005096/ENSSSCG00000009348/ENSSSCG00000004755/ENSSSCG00000024351/ENSSSCG00000002254/ENSSSCG00000009434/ENSSSCG00000005437/ENSSSCG00000000272/ENSSSCG00000037719/ENSSSCG00000011739/ENSSSCG00000017268/ENSSSCG00000035859/ENSSSCG00000011496/ENSSSCG00000033175/ENSSSCG00000005524/ENSSSCG00000003088	EFNA1/HIF1A/STARD13/DLL4/MET/NR2F2/RGCC/KLF4/SP1/PDPK1/PDCD10/PRKCA/WNT5A/ADAMTS9/SASH1/DAB2IP/APOE	17	9	ENSSSCG00000009348/ENSSSCG00000002254/ENSSSCG00000000272/ENSSSCG00000037719/ENSSSCG00000017268/ENSSSCG00000035859/ENSSSCG00000011496/ENSSSCG00000033175/ENSSSCG00000005524	8	ENSSSCG00000006530/ENSSSCG00000005096/ENSSSCG00000004755/ENSSSCG00000024351/ENSSSCG00000009434/ENSSSCG00000005437/ENSSSCG00000011739/ENSSSCG00000003088
BP	GO:0050678	regulation of epithelial cell proliferation	33/1419	187/10877	0.0420442847794549	0.525227224395944	ENSSSCG00000005385/ENSSSCG00000024168/ENSSSCG00000017705/ENSSSCG00000005382/ENSSSCG00000004755/ENSSSCG00000011733/ENSSSCG00000002254/ENSSSCG00000022447/ENSSSCG00000009434/ENSSSCG00000010360/ENSSSCG00000010928/ENSSSCG00000001021/ENSSSCG00000011081/ENSSSCG00000004154/ENSSSCG00000014283/ENSSSCG00000000272/ENSSSCG00000037719/ENSSSCG00000011739/ENSSSCG00000017268/ENSSSCG00000035859/ENSSSCG00000001975/…	NR4A3/AIMP1/CCL5/TGFBR1/DLL4/-/NR2F2/F3/RGCC/BMPR1A/KDM5B/RREB1/-/TNFAIP3/KIF3A/SP1/PDPK1/PDCD10/PRKCA/WNT5A/PRKD1/EGFR/ATPIF1/IFT74/SIRT1/ANG/BAD/DAB2IP/FMC1/NRARP/ESRP2/APOE/INTU	33	11	ENSSSCG00000002254/ENSSSCG00000010928/ENSSSCG00000001021/ENSSSCG00000000272/ENSSSCG00000037719/ENSSSCG00000017268/ENSSSCG00000035859/ENSSSCG00000001975/ENSSSCG00000022126/ENSSSCG00000005524/ENSSSCG00000035227	22	ENSSSCG00000005385/ENSSSCG00000024168/ENSSSCG00000017705/ENSSSCG00000005382/ENSSSCG00000004755/ENSSSCG00000011733/ENSSSCG00000022447/ENSSSCG00000009434/ENSSSCG00000010360/ENSSSCG00000011081/ENSSSCG00000004154/ENSSSCG00000014283/ENSSSCG00000011739/ENSSSCG00000027072/ENSSSCG00000005124/ENSSSCG00000010235/ENSSSCG00000031538/ENSSSCG00000013033/ENSSSCG00000038700/ENSSSCG00000005844/ENSSSCG00000003088/…
BP	GO:0036293	response to decreased oxygen levels	23/1419	122/10877	0.0425165613360131	0.525227224395944	ENSSSCG00000010312/ENSSSCG00000005096/ENSSSCG00000006496/ENSSSCG00000003928/ENSSSCG00000031888/ENSSSCG00000006646/ENSSSCG00000038410/ENSSSCG00000009434/ENSSSCG00000011689/ENSSSCG00000014336/ENSSSCG00000017513/ENSSSCG00000022155/ENSSSCG00000012181/ENSSSCG00000011313/ENSSSCG00000040513/ENSSSCG00000010235/ENSSSCG00000031538/ENSSSCG00000040125/ENSSSCG00000013033/ENSSSCG00000022774/ENSSSCG00000000068/…	PLAU/HIF1A/LMNA/PLK3/DDIT4/ARNT/CPEB2/RGCC/PLOD2/EGR1/NPEPPS/RBPJ/PDK3/LIMD1/AQP3/SIRT1/ANG/NOL3/BAD/NOP53/EP300/ADA/CBFA2T3	23	7	ENSSSCG00000006646/ENSSSCG00000014336/ENSSSCG00000017513/ENSSSCG00000012181/ENSSSCG00000011313/ENSSSCG00000000068/ENSSSCG00000002648	16	ENSSSCG00000010312/ENSSSCG00000005096/ENSSSCG00000006496/ENSSSCG00000003928/ENSSSCG00000031888/ENSSSCG00000038410/ENSSSCG00000009434/ENSSSCG00000011689/ENSSSCG00000022155/ENSSSCG00000040513/ENSSSCG00000010235/ENSSSCG00000031538/ENSSSCG00000040125/ENSSSCG00000013033/ENSSSCG00000022774/ENSSSCG00000021255
BP	GO:0050729	positive regulation of inflammatory response	12/1419	54/10877	0.0425844003214997	0.525227224395944	ENSSSCG00000001952/ENSSSCG00000015801/ENSSSCG00000036828/ENSSSCG00000017466/ENSSSCG00000029615/ENSSSCG00000035859/ENSSSCG00000038073/ENSSSCG00000010627/ENSSSCG00000003042/ENSSSCG00000022820/ENSSSCG00000004898/ENSSSCG00000007691	NFKBIA/TLR3/SNX4/CCR7/VAMP7/WNT5A/NOD2/PDCD4/RPS19/VAMP8/TNFRSF11A/ZP3	12	3	ENSSSCG00000035859/ENSSSCG00000038073/ENSSSCG00000004898	9	ENSSSCG00000001952/ENSSSCG00000015801/ENSSSCG00000036828/ENSSSCG00000017466/ENSSSCG00000029615/ENSSSCG00000010627/ENSSSCG00000003042/ENSSSCG00000022820/ENSSSCG00000007691
BP	GO:0022618	ribonucleoprotein complex assembly	29/1419	161/10877	0.0429812173090453	0.525227224395944	ENSSSCG00000012252/ENSSSCG00000011395/ENSSSCG00000006033/ENSSSCG00000000806/ENSSSCG00000017033/ENSSSCG00000024596/ENSSSCG00000006983/ENSSSCG00000006504/ENSSSCG00000017066/ENSSSCG00000028225/ENSSSCG00000011679/ENSSSCG00000004997/ENSSSCG00000009946/ENSSSCG00000004328/ENSSSCG00000033169/ENSSSCG00000001528/ENSSSCG00000011313/ENSSSCG00000006879/ENSSSCG00000036293/ENSSSCG00000040125/ENSSSCG00000025606/…	DDX3X/RBM5/EIF3E/SCAF11/SLU7/NOCT/CNOT7/KHDC4/GEMIN5/DICER1/ATR/PRPF39/SART3/MDN1/RPS15/RPS10/LIMD1/PTBP2/SRSF10/NOL3/ATM/SNRPD2/NOP53/RPS19/-/LSM3/-/C9orf72/ATXN2	29	8	ENSSSCG00000011395/ENSSSCG00000006504/ENSSSCG00000017066/ENSSSCG00000028225/ENSSSCG00000009946/ENSSSCG00000004328/ENSSSCG00000011313/ENSSSCG00000009834	21	ENSSSCG00000012252/ENSSSCG00000006033/ENSSSCG00000000806/ENSSSCG00000017033/ENSSSCG00000024596/ENSSSCG00000006983/ENSSSCG00000011679/ENSSSCG00000004997/ENSSSCG00000033169/ENSSSCG00000001528/ENSSSCG00000006879/ENSSSCG00000036293/ENSSSCG00000040125/ENSSSCG00000025606/ENSSSCG00000033500/ENSSSCG00000022774/ENSSSCG00000003042/ENSSSCG00000017239/ENSSSCG00000011601/ENSSSCG00000024776/ENSSSCG00000011010
BP	GO:0006282	regulation of DNA repair	14/1419	66/10877	0.0429923293965538	0.525227224395944	ENSSSCG00000023303/ENSSSCG00000021822/ENSSSCG00000003820/ENSSSCG00000027709/ENSSSCG00000037216/ENSSSCG00000027652/ENSSSCG00000003580/ENSSSCG00000000754/ENSSSCG00000024373/ENSSSCG00000016395/ENSSSCG00000022126/ENSSSCG00000010235/ENSSSCG00000012549/ENSSSCG00000014163	FIGNL1/RNF169/USP1/PARP9/PPP4R2/KLHL15/EYA3/RAD52/TRIP12/RIF1/EGFR/SIRT1/CXorf57/SLF1	14	7	ENSSSCG00000023303/ENSSSCG00000021822/ENSSSCG00000027709/ENSSSCG00000003580/ENSSSCG00000000754/ENSSSCG00000024373/ENSSSCG00000022126	7	ENSSSCG00000003820/ENSSSCG00000037216/ENSSSCG00000027652/ENSSSCG00000016395/ENSSSCG00000010235/ENSSSCG00000012549/ENSSSCG00000014163
BP	GO:0097553	calcium ion transmembrane import into cytosol	14/1419	66/10877	0.0429923293965538	0.525227224395944	ENSSSCG00000035355/ENSSSCG00000040751/ENSSSCG00000016929/ENSSSCG00000009217/ENSSSCG00000004460/ENSSSCG00000037719/ENSSSCG00000031493/ENSSSCG00000009125/ENSSSCG00000001975/ENSSSCG00000040125/ENSSSCG00000011681/ENSSSCG00000006231/ENSSSCG00000015136/ENSSSCG00000006390	F2R/DDIT3/PDE4D/PKD2/IBTK/PDPK1/CYBA/ANK2/PRKD1/NOL3/TRPC1/CHD7/UBASH3B/CASQ1	14	7	ENSSSCG00000035355/ENSSSCG00000009217/ENSSSCG00000037719/ENSSSCG00000009125/ENSSSCG00000001975/ENSSSCG00000006231/ENSSSCG00000015136	7	ENSSSCG00000040751/ENSSSCG00000016929/ENSSSCG00000004460/ENSSSCG00000031493/ENSSSCG00000040125/ENSSSCG00000011681/ENSSSCG00000006390
BP	GO:1902656	calcium ion import into cytosol	14/1419	66/10877	0.0429923293965538	0.525227224395944	ENSSSCG00000035355/ENSSSCG00000040751/ENSSSCG00000016929/ENSSSCG00000009217/ENSSSCG00000004460/ENSSSCG00000037719/ENSSSCG00000031493/ENSSSCG00000009125/ENSSSCG00000001975/ENSSSCG00000040125/ENSSSCG00000011681/ENSSSCG00000006231/ENSSSCG00000015136/ENSSSCG00000006390	F2R/DDIT3/PDE4D/PKD2/IBTK/PDPK1/CYBA/ANK2/PRKD1/NOL3/TRPC1/CHD7/UBASH3B/CASQ1	14	7	ENSSSCG00000035355/ENSSSCG00000009217/ENSSSCG00000037719/ENSSSCG00000009125/ENSSSCG00000001975/ENSSSCG00000006231/ENSSSCG00000015136	7	ENSSSCG00000040751/ENSSSCG00000016929/ENSSSCG00000004460/ENSSSCG00000031493/ENSSSCG00000040125/ENSSSCG00000011681/ENSSSCG00000006390
BP	GO:0007420	brain development	60/1419	371/10877	0.0437756126212496	0.525227224395944	ENSSSCG00000010224/ENSSSCG00000005385/ENSSSCG00000003669/ENSSSCG00000011213/ENSSSCG00000005096/ENSSSCG00000033025/ENSSSCG00000006994/ENSSSCG00000016073/ENSSSCG00000002254/ENSSSCG00000011858/ENSSSCG00000010360/ENSSSCG00000010802/ENSSSCG00000012309/ENSSSCG00000012434/ENSSSCG00000026969/ENSSSCG00000007153/ENSSSCG00000038767/ENSSSCG00000026268/ENSSSCG00000003107/ENSSSCG00000009142/ENSSSCG00000039756/…	EGR2/NR4A3/MFSD2A/TOP2B/HIF1A/C21orf91/PCM1/PGAP1/NR2F2/ZNF148/BMPR1A/UCHL5/SHROOM4/ATRX/KRAS/ATRN/MBP/DLG5/ARHGAP35/SEC24B/FOXC1/NIPBL/-/PLCB1/KIF3A/KIF14/FOXO3/TBC1D23/SMARCA1/SEMA7A/SEMA3A/NME5/WNT5A/FZD4/ATXN1L/AHI1/AFDN/PRKDC/POU4F1/LRP2/RBPJ/EGFR/-/CENPF/PAFAH1B3/ATOH1/ATM/CHD7/-/UBA6/FANCC/DAB2IP/ARID1A/MKL1/SALL1/GNB4/CEP120/JHY/RERE/EPHA7	60	30	ENSSSCG00000010224/ENSSSCG00000002254/ENSSSCG00000012309/ENSSSCG00000007153/ENSSSCG00000038767/ENSSSCG00000026268/ENSSSCG00000003107/ENSSSCG00000009142/ENSSSCG00000039756/ENSSSCG00000010912/ENSSSCG00000004387/ENSSSCG00000035859/ENSSSCG00000014920/ENSSSCG00000038917/ENSSSCG00000004018/ENSSSCG00000006274/ENSSSCG00000025334/ENSSSCG00000040746/ENSSSCG00000022126/ENSSSCG00000037530/ENSSSCG00000009196/…	30	ENSSSCG00000005385/ENSSSCG00000003669/ENSSSCG00000011213/ENSSSCG00000005096/ENSSSCG00000033025/ENSSSCG00000006994/ENSSSCG00000016073/ENSSSCG00000011858/ENSSSCG00000010360/ENSSSCG00000010802/ENSSSCG00000012434/ENSSSCG00000026969/ENSSSCG00000016842/ENSSSCG00000011081/ENSSSCG00000007056/ENSSSCG00000014283/ENSSSCG00000030486/ENSSSCG00000012649/ENSSSCG00000023165/ENSSSCG00000015398/ENSSSCG00000027997/…
BP	GO:2000147	positive regulation of cell motility	46/1419	275/10877	0.0438708831832437	0.525227224395944	ENSSSCG00000010312/ENSSSCG00000005096/ENSSSCG00000035355/ENSSSCG00000004595/ENSSSCG00000033228/ENSSSCG00000032613/ENSSSCG00000017705/ENSSSCG00000005382/ENSSSCG00000016254/ENSSSCG00000005240/ENSSSCG00000013410/ENSSSCG00000012131/ENSSSCG00000015874/ENSSSCG00000024351/ENSSSCG00000027074/ENSSSCG00000010457/ENSSSCG00000001021/ENSSSCG00000036008/ENSSSCG00000017466/ENSSSCG00000000804/ENSSSCG00000016842/…	PLAU/HIF1A/F2R/ADAM10/SPAG9/SNAI1/CCL5/TGFBR1/CCL20/DOCK8/SWAP70/MOSPD2/ACVR1/MET/FER/KIF20B/RREB1/TACR1/CCR7/ANO6/NIPBL/SEMA3C/SP1/PDPK1/PDCD10/PRKCA/CXCL8/CLASP1/-/SEMA3A/CCAR1/WNT5A/CSF1/SEMA6A/MYLK/ZNF609/CXCL2/TIAM1/EGFR/ACVR1B/DOCK5/SASH1/RHOD/DAB2IP/-/ZP3	46	21	ENSSSCG00000035355/ENSSSCG00000005240/ENSSSCG00000013410/ENSSSCG00000015874/ENSSSCG00000001021/ENSSSCG00000036008/ENSSSCG00000000804/ENSSSCG00000000272/ENSSSCG00000037719/ENSSSCG00000017268/ENSSSCG00000039157/ENSSSCG00000035859/ENSSSCG00000014224/ENSSSCG00000011867/ENSSSCG00000004551/ENSSSCG00000012034/ENSSSCG00000022126/ENSSSCG00000000233/ENSSSCG00000009650/ENSSSCG00000033175/ENSSSCG00000005524	25	ENSSSCG00000010312/ENSSSCG00000005096/ENSSSCG00000004595/ENSSSCG00000033228/ENSSSCG00000032613/ENSSSCG00000017705/ENSSSCG00000005382/ENSSSCG00000016254/ENSSSCG00000012131/ENSSSCG00000024351/ENSSSCG00000027074/ENSSSCG00000010457/ENSSSCG00000017466/ENSSSCG00000016842/ENSSSCG00000023784/ENSSSCG00000011739/ENSSSCG00000008953/ENSSSCG00000008954/ENSSSCG00000015398/ENSSSCG00000010243/ENSSSCG00000037449/…
BP	GO:0018393	internal peptidyl-lysine acetylation	22/1419	116/10877	0.0438988499239228	0.525227224395944	ENSSSCG00000024253/ENSSSCG00000027115/ENSSSCG00000031159/ENSSSCG00000017310/ENSSSCG00000011081/ENSSSCG00000015952/ENSSSCG00000011917/ENSSSCG00000015215/ENSSSCG00000027211/ENSSSCG00000023324/ENSSSCG00000007458/ENSSSCG00000007023/ENSSSCG00000011540/ENSSSCG00000017983/ENSSSCG00000007606/ENSSSCG00000001880/ENSSSCG00000011776/ENSSSCG00000010235/ENSSSCG00000007951/ENSSSCG00000000068/ENSSSCG00000028018/…	CTCF/-/BEND3/KANSL1/-/HAT1/-/CHEK1/EPC2/KMT2A/NCOA3/KAT6A/SETD5/PER1/TRRAP/SIN3A/YEATS2/SIRT1/CREBBP/EP300/EP400/HCFC1	22	15	ENSSSCG00000024253/ENSSSCG00000027115/ENSSSCG00000031159/ENSSSCG00000017310/ENSSSCG00000023324/ENSSSCG00000007458/ENSSSCG00000007023/ENSSSCG00000011540/ENSSSCG00000007606/ENSSSCG00000001880/ENSSSCG00000011776/ENSSSCG00000007951/ENSSSCG00000000068/ENSSSCG00000028018/ENSSSCG00000012793	7	ENSSSCG00000011081/ENSSSCG00000015952/ENSSSCG00000011917/ENSSSCG00000015215/ENSSSCG00000027211/ENSSSCG00000017983/ENSSSCG00000010235
BP	GO:0043068	positive regulation of programmed cell death	52/1419	316/10877	0.0439605458027965	0.525227224395944	ENSSSCG00000032434/ENSSSCG00000022689/ENSSSCG00000005385/ENSSSCG00000003112/ENSSSCG00000004163/ENSSSCG00000012252/ENSSSCG00000037910/ENSSSCG00000035355/ENSSSCG00000017705/ENSSSCG00000011395/ENSSSCG00000040751/ENSSSCG00000034012/ENSSSCG00000016170/ENSSSCG00000005382/ENSSSCG00000026454/ENSSSCG00000010949/ENSSSCG00000005267/ENSSSCG00000035746/ENSSSCG00000022447/ENSSSCG00000009434/ENSSSCG00000035249/…	PLAUR/GADD45B/NR4A3/-/BCLAF1/DDX3X/DUSP6/F2R/CCL5/RBM5/DDIT3/CASP3/BARD1/TGFBR1/-/DAPK1/ANXA1/ECT2/F3/RGCC/GADD45G/UNC13B/NFKBID/TOP2A/CDKN1A/ANO6/SKIL/FOXO3/STK4/CASP8AP2/HIP1/WNT5A/PRKDC/POU4F1/USP27X/PDCD4/STK17B/ATPIF1/ZC3H8/SIRT1/RPL26/GSDME/NEURL1/ATM/BAD/PDCD1/TNFRSF12A/TP53BP2/DAB2IP/FAS/ADORA2A/EPHA7	52	19	ENSSSCG00000037910/ENSSSCG00000035355/ENSSSCG00000011395/ENSSSCG00000016170/ENSSSCG00000010949/ENSSSCG00000005305/ENSSSCG00000000804/ENSSSCG00000004387/ENSSSCG00000030820/ENSSSCG00000007700/ENSSSCG00000035859/ENSSSCG00000006274/ENSSSCG00000025334/ENSSSCG00000012305/ENSSSCG00000016716/ENSSSCG00000010603/ENSSSCG00000010894/ENSSSCG00000005524/ENSSSCG00000010448	33	ENSSSCG00000032434/ENSSSCG00000022689/ENSSSCG00000005385/ENSSSCG00000003112/ENSSSCG00000004163/ENSSSCG00000012252/ENSSSCG00000017705/ENSSSCG00000040751/ENSSSCG00000034012/ENSSSCG00000005382/ENSSSCG00000026454/ENSSSCG00000005267/ENSSSCG00000035746/ENSSSCG00000022447/ENSSSCG00000009434/ENSSSCG00000035249/ENSSSCG00000002917/ENSSSCG00000017473/ENSSSCG00000001565/ENSSSCG00000011746/ENSSSCG00000004331/…
BP	GO:0032611	interleukin-1 beta production	7/1419	26/10877	0.0443003945765625	0.525227224395944	ENSSSCG00000035355/ENSSSCG00000032360/ENSSSCG00000017466/ENSSSCG00000004154/ENSSSCG00000014336/ENSSSCG00000035859/ENSSSCG00000038073	F2R/PANX1/CCR7/TNFAIP3/EGR1/WNT5A/NOD2	7	5	ENSSSCG00000035355/ENSSSCG00000032360/ENSSSCG00000014336/ENSSSCG00000035859/ENSSSCG00000038073	2	ENSSSCG00000017466/ENSSSCG00000004154
BP	GO:0032655	regulation of interleukin-12 production	7/1419	26/10877	0.0443003945765625	0.525227224395944	ENSSSCG00000014277/ENSSSCG00000015801/ENSSSCG00000030957/ENSSSCG00000017466/ENSSSCG00000007056/ENSSSCG00000024722/ENSSSCG00000033171	IRF1/TLR3/NFKB1/CCR7/PLCB1/PIBF1/MAPK11	7	1	ENSSSCG00000030957	6	ENSSSCG00000014277/ENSSSCG00000015801/ENSSSCG00000017466/ENSSSCG00000007056/ENSSSCG00000024722/ENSSSCG00000033171
BP	GO:0060998	regulation of dendritic spine development	7/1419	26/10877	0.0443003945765625	0.525227224395944	ENSSSCG00000006530/ENSSSCG00000033025/ENSSSCG00000026268/ENSSSCG00000012727/ENSSSCG00000010603/ENSSSCG00000028759/ENSSSCG00000003088	EFNA1/C21orf91/DLG5/FMR1/NEURL1/ASAP1/APOE	7	3	ENSSSCG00000026268/ENSSSCG00000010603/ENSSSCG00000028759	4	ENSSSCG00000006530/ENSSSCG00000033025/ENSSSCG00000012727/ENSSSCG00000003088
BP	GO:0072666	establishment of protein localization to vacuole	7/1419	26/10877	0.0443003945765625	0.525227224395944	ENSSSCG00000006206/ENSSSCG00000004154/ENSSSCG00000029615/ENSSSCG00000029094/ENSSSCG00000008138/ENSSSCG00000015135/ENSSSCG00000006151	-/TNFAIP3/VAMP7/PIK3R4/GCC2/SORL1/SNX16	7	2	ENSSSCG00000029094/ENSSSCG00000015135	5	ENSSSCG00000006206/ENSSSCG00000004154/ENSSSCG00000029615/ENSSSCG00000008138/ENSSSCG00000006151
BP	GO:0032872	regulation of stress-activated MAPK cascade	24/1419	129/10877	0.0445392777275966	0.525227224395944	ENSSSCG00000022689/ENSSSCG00000013312/ENSSSCG00000033228/ENSSSCG00000015801/ENSSSCG00000012110/ENSSSCG00000035249/ENSSSCG00000004192/ENSSSCG00000016140/ENSSSCG00000007056/ENSSSCG00000009671/ENSSSCG00000011739/ENSSSCG00000004037/ENSSSCG00000035859/ENSSSCG00000014920/ENSSSCG00000038073/ENSSSCG00000008496/ENSSSCG00000022126/ENSSSCG00000033175/ENSSSCG00000026733/ENSSSCG00000005524/ENSSSCG00000010448/…	GADD45B/HIPK3/SPAG9/TLR3/MID1/GADD45G/CTGF/FZD5/PLCB1/PBK/PDCD10/MAP3K4/WNT5A/FZD4/NOD2/EIF2AK2/EGFR/SASH1/HIPK2/DAB2IP/FAS/PHLPP1/TNFRSF11A/NCOR1	24	15	ENSSSCG00000012110/ENSSSCG00000004192/ENSSSCG00000016140/ENSSSCG00000004037/ENSSSCG00000035859/ENSSSCG00000014920/ENSSSCG00000038073/ENSSSCG00000022126/ENSSSCG00000033175/ENSSSCG00000026733/ENSSSCG00000005524/ENSSSCG00000010448/ENSSSCG00000004896/ENSSSCG00000004898/ENSSSCG00000018039	9	ENSSSCG00000022689/ENSSSCG00000013312/ENSSSCG00000033228/ENSSSCG00000015801/ENSSSCG00000035249/ENSSSCG00000007056/ENSSSCG00000009671/ENSSSCG00000011739/ENSSSCG00000008496
BP	GO:0051783	regulation of nuclear division	24/1419	129/10877	0.0445392777275966	0.525227224395944	ENSSSCG00000010625/ENSSSCG00000016346/ENSSSCG00000038185/ENSSSCG00000004466/ENSSSCG00000010471/ENSSSCG00000009434/ENSSSCG00000012642/ENSSSCG00000012434/ENSSSCG00000010457/ENSSSCG00000017308/ENSSSCG00000005255/ENSSSCG00000007056/ENSSSCG00000004893/ENSSSCG00000003576/ENSSSCG00000023296/ENSSSCG00000035859/ENSSSCG00000015576/ENSSSCG00000027557/ENSSSCG00000012325/ENSSSCG00000025606/ENSSSCG00000016068/…	SMC3/MAD2L1BP/EREG/TTK/KIF11/RGCC/STAG2/ATRX/KIF20B/CDC27/SMC5/PLCB1/VPS4B/GPR3/CENPE/WNT5A/TPR/CDC14B/SMC1A/ATM/HECW2/UBE2B/GNAI1/SLF1	24	5	ENSSSCG00000016346/ENSSSCG00000035859/ENSSSCG00000027557/ENSSSCG00000012325/ENSSSCG00000016068	19	ENSSSCG00000010625/ENSSSCG00000038185/ENSSSCG00000004466/ENSSSCG00000010471/ENSSSCG00000009434/ENSSSCG00000012642/ENSSSCG00000012434/ENSSSCG00000010457/ENSSSCG00000017308/ENSSSCG00000005255/ENSSSCG00000007056/ENSSSCG00000004893/ENSSSCG00000003576/ENSSSCG00000023296/ENSSSCG00000015576/ENSSSCG00000025606/ENSSSCG00000038953/ENSSSCG00000015407/ENSSSCG00000014163
BP	GO:0070482	response to oxygen levels	24/1419	129/10877	0.0445392777275966	0.525227224395944	ENSSSCG00000010312/ENSSSCG00000005096/ENSSSCG00000006496/ENSSSCG00000003928/ENSSSCG00000031888/ENSSSCG00000006646/ENSSSCG00000038410/ENSSSCG00000009434/ENSSSCG00000011689/ENSSSCG00000014336/ENSSSCG00000017513/ENSSSCG00000022155/ENSSSCG00000012181/ENSSSCG00000011313/ENSSSCG00000040513/ENSSSCG00000010235/ENSSSCG00000031538/ENSSSCG00000040125/ENSSSCG00000013033/ENSSSCG00000022774/ENSSSCG00000000068/…	PLAU/HIF1A/LMNA/PLK3/DDIT4/ARNT/CPEB2/RGCC/PLOD2/EGR1/NPEPPS/RBPJ/PDK3/LIMD1/AQP3/SIRT1/ANG/NOL3/BAD/NOP53/EP300/ADA/FAS/CBFA2T3	24	8	ENSSSCG00000006646/ENSSSCG00000014336/ENSSSCG00000017513/ENSSSCG00000012181/ENSSSCG00000011313/ENSSSCG00000000068/ENSSSCG00000010448/ENSSSCG00000002648	16	ENSSSCG00000010312/ENSSSCG00000005096/ENSSSCG00000006496/ENSSSCG00000003928/ENSSSCG00000031888/ENSSSCG00000038410/ENSSSCG00000009434/ENSSSCG00000011689/ENSSSCG00000022155/ENSSSCG00000040513/ENSSSCG00000010235/ENSSSCG00000031538/ENSSSCG00000040125/ENSSSCG00000013033/ENSSSCG00000022774/ENSSSCG00000021255
BP	GO:2001020	regulation of response to DNA damage stimulus	24/1419	129/10877	0.0445392777275966	0.525227224395944	ENSSSCG00000004163/ENSSSCG00000023303/ENSSSCG00000032613/ENSSSCG00000021822/ENSSSCG00000003820/ENSSSCG00000027709/ENSSSCG00000037216/ENSSSCG00000011746/ENSSSCG00000027652/ENSSSCG00000011679/ENSSSCG00000003580/ENSSSCG00000000754/ENSSSCG00000012727/ENSSSCG00000024373/ENSSSCG00000013402/ENSSSCG00000016395/ENSSSCG00000008357/ENSSSCG00000022126/ENSSSCG00000010235/ENSSSCG00000028850/ENSSSCG00000025606/…	BCLAF1/FIGNL1/SNAI1/RNF169/USP1/PARP9/PPP4R2/SKIL/KLHL15/ATR/EYA3/RAD52/FMR1/TRIP12/USP47/RIF1/SPRED2/EGFR/SIRT1/RPL26/ATM/ERCC4/CXorf57/SLF1	24	9	ENSSSCG00000023303/ENSSSCG00000021822/ENSSSCG00000027709/ENSSSCG00000003580/ENSSSCG00000000754/ENSSSCG00000024373/ENSSSCG00000008357/ENSSSCG00000022126/ENSSSCG00000007881	15	ENSSSCG00000004163/ENSSSCG00000032613/ENSSSCG00000003820/ENSSSCG00000037216/ENSSSCG00000011746/ENSSSCG00000027652/ENSSSCG00000011679/ENSSSCG00000012727/ENSSSCG00000013402/ENSSSCG00000016395/ENSSSCG00000010235/ENSSSCG00000028850/ENSSSCG00000025606/ENSSSCG00000012549/ENSSSCG00000014163
BP	GO:0006896	Golgi to vacuole transport	4/1419	11/10877	0.0446522435943696	0.525227224395944	ENSSSCG00000027509/ENSSSCG00000017877/ENSSSCG00000002740/ENSSSCG00000024232	VPS54/ANKFY1/AP1G1/CCDC91	4	2	ENSSSCG00000017877/ENSSSCG00000002740	2	ENSSSCG00000027509/ENSSSCG00000024232
BP	GO:0006999	nuclear pore organization	4/1419	11/10877	0.0446522435943696	0.525227224395944	ENSSSCG00000010863/ENSSSCG00000026034/ENSSSCG00000010189/ENSSSCG00000015576	AHCTF1/NUP153/NUP133/TPR	4	2	ENSSSCG00000026034/ENSSSCG00000010189	2	ENSSSCG00000010863/ENSSSCG00000015576
BP	GO:0010560	positive regulation of glycoprotein biosynthetic process	4/1419	11/10877	0.0446522435943696	0.525227224395944	ENSSSCG00000006201/ENSSSCG00000017466/ENSSSCG00000007056/ENSSSCG00000010638	ARFGEF1/CCR7/PLCB1/TCF7L2	4	1	ENSSSCG00000010638	3	ENSSSCG00000006201/ENSSSCG00000017466/ENSSSCG00000007056
BP	GO:0019985	translesion synthesis	4/1419	11/10877	0.0446522435943696	0.525227224395944	ENSSSCG00000025703/ENSSSCG00000023724/ENSSSCG00000015600/ENSSSCG00000005008	REV3L/ZBTB1/DTL/POLE2	4	1	ENSSSCG00000015600	3	ENSSSCG00000025703/ENSSSCG00000023724/ENSSSCG00000005008
BP	GO:0033005	positive regulation of mast cell activation	4/1419	11/10877	0.0446522435943696	0.525227224395944	ENSSSCG00000005385/ENSSSCG00000036828/ENSSSCG00000029615/ENSSSCG00000022820	NR4A3/SNX4/VAMP7/VAMP8	4	0		4	ENSSSCG00000005385/ENSSSCG00000036828/ENSSSCG00000029615/ENSSSCG00000022820
BP	GO:0034086	maintenance of sister chromatid cohesion	4/1419	11/10877	0.0446522435943696	0.525227224395944	ENSSSCG00000012434/ENSSSCG00000005255/ENSSSCG00000016842/ENSSSCG00000014163	ATRX/SMC5/NIPBL/SLF1	4	0		4	ENSSSCG00000012434/ENSSSCG00000005255/ENSSSCG00000016842/ENSSSCG00000014163
BP	GO:0034088	maintenance of mitotic sister chromatid cohesion	4/1419	11/10877	0.0446522435943696	0.525227224395944	ENSSSCG00000012434/ENSSSCG00000005255/ENSSSCG00000016842/ENSSSCG00000014163	ATRX/SMC5/NIPBL/SLF1	4	0		4	ENSSSCG00000012434/ENSSSCG00000005255/ENSSSCG00000016842/ENSSSCG00000014163
BP	GO:0035872	nucleotide-binding domain, leucine rich repeat containing receptor signaling pathway	4/1419	11/10877	0.0446522435943696	0.525227224395944	ENSSSCG00000001952/ENSSSCG00000016954/ENSSSCG00000004154/ENSSSCG00000038073	NFKBIA/ERBIN/TNFAIP3/NOD2	4	1	ENSSSCG00000038073	3	ENSSSCG00000001952/ENSSSCG00000016954/ENSSSCG00000004154
BP	GO:1901798	positive regulation of signal transduction by p53 class mediator	4/1419	11/10877	0.0446522435943696	0.525227224395944	ENSSSCG00000011679/ENSSSCG00000008357/ENSSSCG00000028850/ENSSSCG00000025606	ATR/SPRED2/RPL26/ATM	4	1	ENSSSCG00000008357	3	ENSSSCG00000011679/ENSSSCG00000028850/ENSSSCG00000025606
BP	GO:0009894	regulation of catabolic process	75/1419	476/10877	0.0447539709404787	0.525227224395944	ENSSSCG00000007351/ENSSSCG00000006530/ENSSSCG00000006084/ENSSSCG00000005096/ENSSSCG00000031882/ENSSSCG00000008452/ENSSSCG00000040663/ENSSSCG00000001488/ENSSSCG00000011853/ENSSSCG00000003928/ENSSSCG00000006066/ENSSSCG00000031888/ENSSSCG00000008740/ENSSSCG00000016925/ENSSSCG00000009994/ENSSSCG00000011510/ENSSSCG00000004339/ENSSSCG00000010563/ENSSSCG00000027646/ENSSSCG00000010949/ENSSSCG00000011765/…	FAM83D/EFNA1/MTDH/HIF1A/PNPT1/LRPPRC/HERPUD1/GCLC/RUBCN/PLK3/RNF19A/DDIT4/FBXL5/PLK2/MTMR3/TMF1/UFL1/BTRC/TIPARP/DAPK1/USP13/CNOT7/SCFD1/VPS13C/SOCS4/UCHL5/DTL/TMTC3/IRS1/MTM1/FZD5/RIC1/TNFAIP3/PBK/XPO1/PRICKLE1/SMARCC1/PTPN3/MTMR9/TNRC6C/FYCO1/CUL4B/PSMC6/PPP1R3B/FMR1/PPARA/PIP4K2B/WNT5A/ATP2B4/TNRC6B/ETFBKMT/SORL1/EGFR/ATPIF1/TSPO/MTCL1/SVIP/SIRT1/USP25/ATM/UQCC2/NOP53/LRIG2/LARP1/DAB2IP/FMC1/C…	75	37	ENSSSCG00000007351/ENSSSCG00000001488/ENSSSCG00000011853/ENSSSCG00000008740/ENSSSCG00000016925/ENSSSCG00000009994/ENSSSCG00000010563/ENSSSCG00000010949/ENSSSCG00000011765/ENSSSCG00000015600/ENSSSCG00000025729/ENSSSCG00000012742/ENSSSCG00000016140/ENSSSCG00000005208/ENSSSCG00000034491/ENSSSCG00000011340/ENSSSCG00000005449/ENSSSCG00000034373/ENSSSCG00000011317/ENSSSCG00000022797/ENSSSCG00000000006/…	38	ENSSSCG00000006530/ENSSSCG00000006084/ENSSSCG00000005096/ENSSSCG00000031882/ENSSSCG00000008452/ENSSSCG00000040663/ENSSSCG00000003928/ENSSSCG00000006066/ENSSSCG00000031888/ENSSSCG00000011510/ENSSSCG00000004339/ENSSSCG00000027646/ENSSSCG00000006983/ENSSSCG00000001973/ENSSSCG00000036431/ENSSSCG00000032332/ENSSSCG00000010802/ENSSSCG00000000927/ENSSSCG00000004154/ENSSSCG00000009671/ENSSSCG00000028228/…
BP	GO:0045666	positive regulation of neuron differentiation	26/1419	142/10877	0.0447610732303581	0.525227224395944	ENSSSCG00000033228/ENSSSCG00000033025/ENSSSCG00000035746/ENSSSCG00000027410/ENSSSCG00000026268/ENSSSCG00000003107/ENSSSCG00000021206/ENSSSCG00000029615/ENSSSCG00000023165/ENSSSCG00000035859/ENSSSCG00000015985/ENSSSCG00000009196/ENSSSCG00000010603/ENSSSCG00000027130/ENSSSCG00000011243/ENSSSCG00000008122/ENSSSCG00000003654/ENSSSCG00000004582/ENSSSCG00000000948/ENSSSCG00000005524/ENSSSCG00000013880/…	SPAG9/C21orf91/ECT2/CBFA2T2/DLG5/ARHGAP35/IL1RAP/VAMP7/SEMA7A/WNT5A/HOXD3/ATOH1/NEURL1/TNFRSF12A/GOLGA4/ADRA2B/MACF1/BNIP2/SYT1/DAB2IP/UNC13A/PRKN/SYT17/CDKL5/APOE/CDH4	26	16	ENSSSCG00000027410/ENSSSCG00000026268/ENSSSCG00000003107/ENSSSCG00000035859/ENSSSCG00000015985/ENSSSCG00000009196/ENSSSCG00000010603/ENSSSCG00000008122/ENSSSCG00000003654/ENSSSCG00000000948/ENSSSCG00000005524/ENSSSCG00000013880/ENSSSCG00000004032/ENSSSCG00000022200/ENSSSCG00000012156/ENSSSCG00000025784	10	ENSSSCG00000033228/ENSSSCG00000033025/ENSSSCG00000035746/ENSSSCG00000021206/ENSSSCG00000029615/ENSSSCG00000023165/ENSSSCG00000027130/ENSSSCG00000011243/ENSSSCG00000004582/ENSSSCG00000003088
BP	GO:0050778	positive regulation of immune response	49/1419	296/10877	0.0451439622151323	0.525227224395944	ENSSSCG00000001952/ENSSSCG00000027529/ENSSSCG00000005385/ENSSSCG00000014277/ENSSSCG00000038185/ENSSSCG00000015801/ENSSSCG00000016929/ENSSSCG00000036828/ENSSSCG00000003582/ENSSSCG00000016954/ENSSSCG00000009440/ENSSSCG00000005267/ENSSSCG00000009434/ENSSSCG00000011848/ENSSSCG00000023724/ENSSSCG00000027709/ENSSSCG00000023709/ENSSSCG00000017466/ENSSSCG00000016140/ENSSSCG00000020931/ENSSSCG00000004154/…	NFKBIA/BIRC3/NR4A3/IRF1/EREG/TLR3/PDE4D/SNX4/SMPDL3B/ERBIN/ELF1/ANXA1/RGCC/TFRC/ZBTB1/PARP9/PTPRJ/CCR7/FZD5/MSH6/TNFAIP3/VAMP7/AP1G1/PDPK1/SLC39A10/ATAD5/ANKRD17/CYBA/SEMA7A/WNT5A/PRKDC/RIF1/STX7/NOD2/SIN3A/POLR3G/PUM1/SIRT1/LY96/NOP53/RPS19/NFATC2/VAMP8/DAB2IP/ADA/CD79A/PDE4B/ZP3/CD180	49	16	ENSSSCG00000009440/ENSSSCG00000027709/ENSSSCG00000023709/ENSSSCG00000016140/ENSSSCG00000020931/ENSSSCG00000002740/ENSSSCG00000037719/ENSSSCG00000024592/ENSSSCG00000035859/ENSSSCG00000006274/ENSSSCG00000038073/ENSSSCG00000001880/ENSSSCG00000003591/ENSSSCG00000007477/ENSSSCG00000005524/ENSSSCG00000016957	33	ENSSSCG00000001952/ENSSSCG00000027529/ENSSSCG00000005385/ENSSSCG00000014277/ENSSSCG00000038185/ENSSSCG00000015801/ENSSSCG00000016929/ENSSSCG00000036828/ENSSSCG00000003582/ENSSSCG00000016954/ENSSSCG00000005267/ENSSSCG00000009434/ENSSSCG00000011848/ENSSSCG00000023724/ENSSSCG00000017466/ENSSSCG00000004154/ENSSSCG00000029615/ENSSSCG00000031954/ENSSSCG00000035954/ENSSSCG00000031493/ENSSSCG00000023165/…
BP	GO:0006470	protein dephosphorylation	31/1419	175/10877	0.0455505927687047	0.525227224395944	ENSSSCG00000037910/ENSSSCG00000008398/ENSSSCG00000003155/ENSSSCG00000008540/ENSSSCG00000009994/ENSSSCG00000010563/ENSSSCG00000036751/ENSSSCG00000013410/ENSSSCG00000017042/ENSSSCG00000021893/ENSSSCG00000032097/ENSSSCG00000040815/ENSSSCG00000015582/ENSSSCG00000023709/ENSSSCG00000012742/ENSSSCG00000017642/ENSSSCG00000035971/ENSSSCG00000005449/ENSSSCG00000003580/ENSSSCG00000009943/ENSSSCG00000031954/…	DUSP6/PPP4R3B/PPP1R15A/PPP1CB/MTMR3/BTRC/PPM1H/SWAP70/UBLCP1/ROCK1/DUSP16/DUSP5/PTPN14/PTPRJ/MTM1/MTMR4/DUSP2/PTPN3/EYA3/SSH1/SLC39A10/CDC14B/STYX/-/FBXW11/PTPRB/CNEP1R1/UBASH3B/PHLPP1/PPP4R4/PTPN21	31	19	ENSSSCG00000037910/ENSSSCG00000009994/ENSSSCG00000010563/ENSSSCG00000036751/ENSSSCG00000013410/ENSSSCG00000032097/ENSSSCG00000015582/ENSSSCG00000023709/ENSSSCG00000012742/ENSSSCG00000017642/ENSSSCG00000005449/ENSSSCG00000003580/ENSSSCG00000009943/ENSSSCG00000027557/ENSSSCG00000023307/ENSSSCG00000000504/ENSSSCG00000015136/ENSSSCG00000004896/ENSSSCG00000002425	12	ENSSSCG00000008398/ENSSSCG00000003155/ENSSSCG00000008540/ENSSSCG00000017042/ENSSSCG00000021893/ENSSSCG00000040815/ENSSSCG00000035971/ENSSSCG00000031954/ENSSSCG00000005039/ENSSSCG00000010440/ENSSSCG00000036005/ENSSSCG00000002474
BP	GO:0043122	regulation of I-kappaB kinase/NF-kappaB signaling	29/1419	162/10877	0.0460807746767596	0.525227224395944	ENSSSCG00000001952/ENSSSCG00000006084/ENSSSCG00000035355/ENSSSCG00000006663/ENSSSCG00000015801/ENSSSCG00000016925/ENSSSCG00000010563/ENSSSCG00000035746/ENSSSCG00000021068/ENSSSCG00000002917/ENSSSCG00000004154/ENSSSCG00000026940/ENSSSCG00000037719/ENSSSCG00000017330/ENSSSCG00000030423/ENSSSCG00000024592/ENSSSCG00000032857/ENSSSCG00000000579/ENSSSCG00000038073/ENSSSCG00000033854/ENSSSCG00000006954/…	NFKBIA/MTDH/F2R/OTUD7B/TLR3/PLK2/BTRC/ECT2/TRAF5/NFKBID/TNFAIP3/CASP10/PDPK1/MAP3K14/MIER1/ANKRD17/S100A12/GOLT1B/NOD2/LGALS1/EEF1D/SIRT1/FBXW11/S100A13/NOL3/DAB2IP/PRKN/IFIT5/BRD4	29	13	ENSSSCG00000035355/ENSSSCG00000006663/ENSSSCG00000016925/ENSSSCG00000010563/ENSSSCG00000021068/ENSSSCG00000026940/ENSSSCG00000037719/ENSSSCG00000024592/ENSSSCG00000038073/ENSSSCG00000023307/ENSSSCG00000005524/ENSSSCG00000004032/ENSSSCG00000022227	16	ENSSSCG00000001952/ENSSSCG00000006084/ENSSSCG00000015801/ENSSSCG00000035746/ENSSSCG00000002917/ENSSSCG00000004154/ENSSSCG00000017330/ENSSSCG00000030423/ENSSSCG00000032857/ENSSSCG00000000579/ENSSSCG00000033854/ENSSSCG00000006954/ENSSSCG00000010235/ENSSSCG00000038991/ENSSSCG00000040125/ENSSSCG00000010454
BP	GO:0060322	head development	64/1419	400/10877	0.0462849848166269	0.525227224395944	ENSSSCG00000011264/ENSSSCG00000010224/ENSSSCG00000005385/ENSSSCG00000003669/ENSSSCG00000011213/ENSSSCG00000005096/ENSSSCG00000033025/ENSSSCG00000006994/ENSSSCG00000027646/ENSSSCG00000016073/ENSSSCG00000002254/ENSSSCG00000011858/ENSSSCG00000015590/ENSSSCG00000010360/ENSSSCG00000010802/ENSSSCG00000012309/ENSSSCG00000012434/ENSSSCG00000026969/ENSSSCG00000007153/ENSSSCG00000038767/ENSSSCG00000026268/…	CSRNP1/EGR2/NR4A3/MFSD2A/TOP2B/HIF1A/C21orf91/PCM1/TIPARP/PGAP1/NR2F2/ZNF148/FLVCR1/BMPR1A/UCHL5/SHROOM4/ATRX/KRAS/ATRN/MBP/DLG5/ARHGAP35/SEC24B/FOXC1/NIPBL/-/PLCB1/KIF3A/KIF14/FOXO3/TBC1D23/SMARCA1/SEMA7A/SEMA3A/NME5/WNT5A/FZD4/ATXN1L/AHI1/AFDN/PRKDC/POU4F1/LRP2/RBPJ/EGFR/-/CENPF/PAFAH1B3/ATOH1/ATM/CHD7/-/UBA6/FANCC/DAB2IP/ARID1A/MKL1/SALL1/GNB4/CEP120/JHY/RERE/EPHA7/ANKRD11	64	32	ENSSSCG00000010224/ENSSSCG00000002254/ENSSSCG00000015590/ENSSSCG00000012309/ENSSSCG00000007153/ENSSSCG00000038767/ENSSSCG00000026268/ENSSSCG00000003107/ENSSSCG00000009142/ENSSSCG00000039756/ENSSSCG00000010912/ENSSSCG00000004387/ENSSSCG00000035859/ENSSSCG00000014920/ENSSSCG00000038917/ENSSSCG00000004018/ENSSSCG00000006274/ENSSSCG00000025334/ENSSSCG00000040746/ENSSSCG00000022126/ENSSSCG00000037530/…	32	ENSSSCG00000011264/ENSSSCG00000005385/ENSSSCG00000003669/ENSSSCG00000011213/ENSSSCG00000005096/ENSSSCG00000033025/ENSSSCG00000006994/ENSSSCG00000027646/ENSSSCG00000016073/ENSSSCG00000011858/ENSSSCG00000010360/ENSSSCG00000010802/ENSSSCG00000012434/ENSSSCG00000026969/ENSSSCG00000016842/ENSSSCG00000011081/ENSSSCG00000007056/ENSSSCG00000014283/ENSSSCG00000030486/ENSSSCG00000012649/ENSSSCG00000023165/…
BP	GO:0071103	DNA conformation change	25/1419	136/10877	0.0464266317055196	0.525227224395944	ENSSSCG00000009047/ENSSSCG00000011213/ENSSSCG00000005403/ENSSSCG00000012252/ENSSSCG00000024253/ENSSSCG00000006127/ENSSSCG00000004358/ENSSSCG00000011731/ENSSSCG00000000693/ENSSSCG00000012434/ENSSSCG00000017473/ENSSSCG00000010357/ENSSSCG00000015952/ENSSSCG00000004439/ENSSSCG00000009946/ENSSSCG00000010240/ENSSSCG00000031122/ENSSSCG00000015576/ENSSSCG00000000580/ENSSSCG00000007023/ENSSSCG00000033566/…	SMARCA5/TOP2B/SMC2/DDX3X/CTCF/NBN/ASCC3/SMC4/NCAPD2/ATRX/TOP2A/WAPL/HAT1/TSPYL4/SART3/DNA2/HIST1H2BB/TPR/RECQL/KAT6A/-/-/PRM2/HIST1H3E/MTERF1	25	5	ENSSSCG00000024253/ENSSSCG00000000693/ENSSSCG00000004439/ENSSSCG00000009946/ENSSSCG00000007023	20	ENSSSCG00000009047/ENSSSCG00000011213/ENSSSCG00000005403/ENSSSCG00000012252/ENSSSCG00000006127/ENSSSCG00000004358/ENSSSCG00000011731/ENSSSCG00000012434/ENSSSCG00000017473/ENSSSCG00000010357/ENSSSCG00000015952/ENSSSCG00000010240/ENSSSCG00000031122/ENSSSCG00000015576/ENSSSCG00000000580/ENSSSCG00000033566/ENSSSCG00000033065/ENSSSCG00000024307/ENSSSCG00000034986/ENSSSCG00000015309
BP	GO:0051960	regulation of nervous system development	69/1419	435/10877	0.0465808962289203	0.525227224395944	ENSSSCG00000006530/ENSSSCG00000005096/ENSSSCG00000016916/ENSSSCG00000033228/ENSSSCG00000033025/ENSSSCG00000004339/ENSSSCG00000005235/ENSSSCG00000006994/ENSSSCG00000004755/ENSSSCG00000035746/ENSSSCG00000008406/ENSSSCG00000021586/ENSSSCG00000010030/ENSSSCG00000010360/ENSSSCG00000005437/ENSSSCG00000010457/ENSSSCG00000027410/ENSSSCG00000026268/ENSSSCG00000003107/ENSSSCG00000009142/ENSSSCG00000016842/…	EFNA1/HIF1A/IL6ST/SPAG9/C21orf91/UFL1/KANK1/PCM1/DLL4/ECT2/CCDC88A/ZHX2/EIF4ENIF1/BMPR1A/KLF4/KIF20B/CBFA2T2/DLG5/ARHGAP35/SEC24B/NIPBL/IL1RAP/VAMP7/KIF14/KIF13B/SSH1/FMR1/SEMA7A/SEMA3A/WNT5A/CSF1/HOXD3/SEMA6A/AFDN/EIF4E/POU4F1/GPR161/CAMSAP2/LRP2/ZNF609/EFNB3/SORL1/ATOH1/NEURL1/SIPA1L1/CHD7/ADGRL3/TNFRSF12A/GOLGA4/ADRA2B/MACF1/BNIP2/SYT1/LRIG2/WDR36/SLITRK3/DAB2IP/UNC13A/PRKN/SYT17/ASAP1/LRTM2/C…	69	40	ENSSSCG00000005235/ENSSSCG00000021586/ENSSSCG00000010030/ENSSSCG00000027410/ENSSSCG00000026268/ENSSSCG00000003107/ENSSSCG00000009142/ENSSSCG00000010912/ENSSSCG00000009683/ENSSSCG00000009943/ENSSSCG00000035859/ENSSSCG00000015985/ENSSSCG00000014224/ENSSSCG00000004018/ENSSSCG00000025334/ENSSSCG00000006302/ENSSSCG00000027314/ENSSSCG00000040746/ENSSSCG00000004551/ENSSSCG00000017948/ENSSSCG00000015135/…	29	ENSSSCG00000006530/ENSSSCG00000005096/ENSSSCG00000016916/ENSSSCG00000033228/ENSSSCG00000033025/ENSSSCG00000004339/ENSSSCG00000006994/ENSSSCG00000004755/ENSSSCG00000035746/ENSSSCG00000008406/ENSSSCG00000010360/ENSSSCG00000005437/ENSSSCG00000010457/ENSSSCG00000016842/ENSSSCG00000021206/ENSSSCG00000029615/ENSSSCG00000012727/ENSSSCG00000023165/ENSSSCG00000015398/ENSSSCG00000037449/ENSSSCG00000028420/…
BP	GO:0003203	endocardial cushion morphogenesis	6/1419	21/10877	0.0467636837097549	0.525227224395944	ENSSSCG00000032613/ENSSSCG00000005382/ENSSSCG00000015874/ENSSSCG00000010360/ENSSSCG00000022155/ENSSSCG00000029189	SNAI1/TGFBR1/ACVR1/BMPR1A/RBPJ/DCHS1	6	2	ENSSSCG00000015874/ENSSSCG00000029189	4	ENSSSCG00000032613/ENSSSCG00000005382/ENSSSCG00000010360/ENSSSCG00000022155
BP	GO:0043001	Golgi to plasma membrane protein transport	6/1419	21/10877	0.0467636837097549	0.525227224395944	ENSSSCG00000038558/ENSSSCG00000029615/ENSSSCG00000022396/ENSSSCG00000040786/ENSSSCG00000011243/ENSSSCG00000003654	GOLPH3L/VAMP7/BLZF1/SPTBN1/GOLGA4/MACF1	6	2	ENSSSCG00000040786/ENSSSCG00000003654	4	ENSSSCG00000038558/ENSSSCG00000029615/ENSSSCG00000022396/ENSSSCG00000011243
BP	GO:0045581	negative regulation of T cell differentiation	6/1419	21/10877	0.0467636837097549	0.525227224395944	ENSSSCG00000014277/ENSSSCG00000005267/ENSSSCG00000002917/ENSSSCG00000009007/ENSSSCG00000008099/ENSSSCG00000005844	IRF1/ANXA1/NFKBID/TMEM131L/ZC3H8/NRARP	6	1	ENSSSCG00000009007	5	ENSSSCG00000014277/ENSSSCG00000005267/ENSSSCG00000002917/ENSSSCG00000008099/ENSSSCG00000005844
BP	GO:0045773	positive regulation of axon extension	6/1419	21/10877	0.0467636837097549	0.525227224395944	ENSSSCG00000023165/ENSSSCG00000027130/ENSSSCG00000011243/ENSSSCG00000003654/ENSSSCG00000012156/ENSSSCG00000025784	SEMA7A/TNFRSF12A/GOLGA4/MACF1/CDKL5/CDH4	6	3	ENSSSCG00000003654/ENSSSCG00000012156/ENSSSCG00000025784	3	ENSSSCG00000023165/ENSSSCG00000027130/ENSSSCG00000011243
BP	GO:0070979	protein K11-linked ubiquitination	6/1419	21/10877	0.0467636837097549	0.525227224395944	ENSSSCG00000017308/ENSSSCG00000016564/ENSSSCG00000008105/ENSSSCG00000033057/ENSSSCG00000038953/ENSSSCG00000004032	CDC27/UBE2H/ANAPC1/ANAPC13/UBE2B/PRKN	6	3	ENSSSCG00000016564/ENSSSCG00000008105/ENSSSCG00000004032	3	ENSSSCG00000017308/ENSSSCG00000033057/ENSSSCG00000038953
BP	GO:0090207	regulation of triglyceride metabolic process	6/1419	21/10877	0.0467636837097549	0.525227224395944	ENSSSCG00000035037/ENSSSCG00000011760/ENSSSCG00000010235/ENSSSCG00000036005/ENSSSCG00000003088/ENSSSCG00000031367	-/TBL1XR1/SIRT1/CNEP1R1/APOE/-	6	0		6	ENSSSCG00000035037/ENSSSCG00000011760/ENSSSCG00000010235/ENSSSCG00000036005/ENSSSCG00000003088/ENSSSCG00000031367
BP	GO:0038127	ERBB signaling pathway	16/1419	79/10877	0.0468114591914478	0.525227224395944	ENSSSCG00000032434/ENSSSCG00000038185/ENSSSCG00000001483/ENSSSCG00000032332/ENSSSCG00000027074/ENSSSCG00000023709/ENSSSCG00000003731/ENSSSCG00000037719/ENSSSCG00000007700/ENSSSCG00000015115/ENSSSCG00000022155/ENSSSCG00000022126/ENSSSCG00000036568/ENSSSCG00000010603/ENSSSCG00000008122/ENSSSCG00000000634	PLAUR/EREG/FAM83B/SOCS4/FER/PTPRJ/GAREM1/PDPK1/HIP1/CBL/RBPJ/EGFR/MVB12A/NEURL1/ADRA2B/STYK1	16	9	ENSSSCG00000023709/ENSSSCG00000003731/ENSSSCG00000037719/ENSSSCG00000007700/ENSSSCG00000015115/ENSSSCG00000022126/ENSSSCG00000010603/ENSSSCG00000008122/ENSSSCG00000000634	7	ENSSSCG00000032434/ENSSSCG00000038185/ENSSSCG00000001483/ENSSSCG00000032332/ENSSSCG00000027074/ENSSSCG00000022155/ENSSSCG00000036568
BP	GO:0045995	regulation of embryonic development	16/1419	79/10877	0.0468114591914478	0.525227224395944	ENSSSCG00000032613/ENSSSCG00000024596/ENSSSCG00000021597/ENSSSCG00000010360/ENSSSCG00000005437/ENSSSCG00000038767/ENSSSCG00000009142/ENSSSCG00000016842/ENSSSCG00000007056/ENSSSCG00000030820/ENSSSCG00000039157/ENSSSCG00000035859/ENSSSCG00000006302/ENSSSCG00000005844/ENSSSCG00000006280/ENSSSCG00000017982	SNAI1/NOCT/PHLDA2/BMPR1A/KLF4/MBP/SEC24B/NIPBL/PLCB1/STK4/CLASP1/WNT5A/GPR161/NRARP/GORAB/HES7	16	6	ENSSSCG00000038767/ENSSSCG00000009142/ENSSSCG00000030820/ENSSSCG00000039157/ENSSSCG00000035859/ENSSSCG00000006302	10	ENSSSCG00000032613/ENSSSCG00000024596/ENSSSCG00000021597/ENSSSCG00000010360/ENSSSCG00000005437/ENSSSCG00000016842/ENSSSCG00000007056/ENSSSCG00000005844/ENSSSCG00000006280/ENSSSCG00000017982
BP	GO:1990823	response to leukemia inhibitory factor	16/1419	79/10877	0.0468114591914478	0.525227224395944	ENSSSCG00000009047/ENSSSCG00000004163/ENSSSCG00000022300/ENSSSCG00000011848/ENSSSCG00000010928/ENSSSCG00000005437/ENSSSCG00000011803/ENSSSCG00000011739/ENSSSCG00000014920/ENSSSCG00000026829/ENSSSCG00000016395/ENSSSCG00000025298/ENSSSCG00000020817/ENSSSCG00000010235/ENSSSCG00000000844/ENSSSCG00000001061	SMARCA5/BCLAF1/MAT2A/TFRC/KDM5B/KLF4/EIF4A2/PDCD10/FZD4/MYNN/RIF1/TWISTNB/RPS16/SIRT1/NFYB/JARID2	16	4	ENSSSCG00000022300/ENSSSCG00000010928/ENSSSCG00000014920/ENSSSCG00000001061	12	ENSSSCG00000009047/ENSSSCG00000004163/ENSSSCG00000011848/ENSSSCG00000005437/ENSSSCG00000011803/ENSSSCG00000011739/ENSSSCG00000026829/ENSSSCG00000016395/ENSSSCG00000025298/ENSSSCG00000020817/ENSSSCG00000010235/ENSSSCG00000000844
BP	GO:1990830	cellular response to leukemia inhibitory factor	16/1419	79/10877	0.0468114591914478	0.525227224395944	ENSSSCG00000009047/ENSSSCG00000004163/ENSSSCG00000022300/ENSSSCG00000011848/ENSSSCG00000010928/ENSSSCG00000005437/ENSSSCG00000011803/ENSSSCG00000011739/ENSSSCG00000014920/ENSSSCG00000026829/ENSSSCG00000016395/ENSSSCG00000025298/ENSSSCG00000020817/ENSSSCG00000010235/ENSSSCG00000000844/ENSSSCG00000001061	SMARCA5/BCLAF1/MAT2A/TFRC/KDM5B/KLF4/EIF4A2/PDCD10/FZD4/MYNN/RIF1/TWISTNB/RPS16/SIRT1/NFYB/JARID2	16	4	ENSSSCG00000022300/ENSSSCG00000010928/ENSSSCG00000014920/ENSSSCG00000001061	12	ENSSSCG00000009047/ENSSSCG00000004163/ENSSSCG00000011848/ENSSSCG00000005437/ENSSSCG00000011803/ENSSSCG00000011739/ENSSSCG00000026829/ENSSSCG00000016395/ENSSSCG00000025298/ENSSSCG00000020817/ENSSSCG00000010235/ENSSSCG00000000844
BP	GO:0050867	positive regulation of cell activation	30/1419	169/10877	0.0474094781734876	0.525227224395944	ENSSSCG00000005385/ENSSSCG00000016916/ENSSSCG00000017705/ENSSSCG00000012713/ENSSSCG00000036828/ENSSSCG00000005240/ENSSSCG00000005267/ENSSSCG00000011848/ENSSSCG00000023724/ENSSSCG00000017466/ENSSSCG00000001565/ENSSSCG00000031498/ENSSSCG00000020931/ENSSSCG00000011081/ENSSSCG00000029615/ENSSSCG00000002740/ENSSSCG00000031954/ENSSSCG00000035954/ENSSSCG00000035859/ENSSSCG00000016395/ENSSSCG00000017948/…	NR4A3/IL6ST/CCL5/ATP11C/SNX4/DOCK8/ANXA1/TFRC/ZBTB1/CCR7/CDKN1A/PPP2R3C/MSH6/-/VAMP7/AP1G1/SLC39A10/ATAD5/WNT5A/RIF1/EFNB3/NOD2/LGALS1/CD320/BAD/NFATC2/VAMP8/ADA/ZMIZ1/ZP3	30	8	ENSSSCG00000005240/ENSSSCG00000020931/ENSSSCG00000002740/ENSSSCG00000035859/ENSSSCG00000017948/ENSSSCG00000038073/ENSSSCG00000007477/ENSSSCG00000010329	22	ENSSSCG00000005385/ENSSSCG00000016916/ENSSSCG00000017705/ENSSSCG00000012713/ENSSSCG00000036828/ENSSSCG00000005267/ENSSSCG00000011848/ENSSSCG00000023724/ENSSSCG00000017466/ENSSSCG00000001565/ENSSSCG00000031498/ENSSSCG00000011081/ENSSSCG00000029615/ENSSSCG00000031954/ENSSSCG00000035954/ENSSSCG00000016395/ENSSSCG00000033854/ENSSSCG00000032833/ENSSSCG00000013033/ENSSSCG00000022820/ENSSSCG00000021255/…
BP	GO:0071826	ribonucleoprotein complex subunit organization	30/1419	169/10877	0.0474094781734876	0.525227224395944	ENSSSCG00000011027/ENSSSCG00000012252/ENSSSCG00000011395/ENSSSCG00000006033/ENSSSCG00000000806/ENSSSCG00000017033/ENSSSCG00000024596/ENSSSCG00000006983/ENSSSCG00000006504/ENSSSCG00000017066/ENSSSCG00000028225/ENSSSCG00000011679/ENSSSCG00000004997/ENSSSCG00000009946/ENSSSCG00000004328/ENSSSCG00000033169/ENSSSCG00000001528/ENSSSCG00000011313/ENSSSCG00000006879/ENSSSCG00000036293/ENSSSCG00000040125/…	KIF5B/DDX3X/RBM5/EIF3E/SCAF11/SLU7/NOCT/CNOT7/KHDC4/GEMIN5/DICER1/ATR/PRPF39/SART3/MDN1/RPS15/RPS10/LIMD1/PTBP2/SRSF10/NOL3/ATM/SNRPD2/NOP53/RPS19/-/LSM3/-/C9orf72/ATXN2	30	8	ENSSSCG00000011395/ENSSSCG00000006504/ENSSSCG00000017066/ENSSSCG00000028225/ENSSSCG00000009946/ENSSSCG00000004328/ENSSSCG00000011313/ENSSSCG00000009834	22	ENSSSCG00000011027/ENSSSCG00000012252/ENSSSCG00000006033/ENSSSCG00000000806/ENSSSCG00000017033/ENSSSCG00000024596/ENSSSCG00000006983/ENSSSCG00000011679/ENSSSCG00000004997/ENSSSCG00000033169/ENSSSCG00000001528/ENSSSCG00000006879/ENSSSCG00000036293/ENSSSCG00000040125/ENSSSCG00000025606/ENSSSCG00000033500/ENSSSCG00000022774/ENSSSCG00000003042/ENSSSCG00000017239/ENSSSCG00000011601/ENSSSCG00000024776/…
BP	GO:0010742	macrophage derived foam cell differentiation	5/1419	16/10877	0.0475928241271439	0.525227224395944	ENSSSCG00000001952/ENSSSCG00000017255/ENSSSCG00000000006/ENSSSCG00000037449/ENSSSCG00000000068	NFKBIA/ABCA5/PPARA/CSF1/EP300	5	2	ENSSSCG00000000006/ENSSSCG00000000068	3	ENSSSCG00000001952/ENSSSCG00000017255/ENSSSCG00000037449
BP	GO:0010971	positive regulation of G2/M transition of mitotic cell cycle	5/1419	16/10877	0.0475928241271439	0.525227224395944	ENSSSCG00000027251/ENSSSCG00000015600/ENSSSCG00000004893/ENSSSCG00000001880/ENSSSCG00000022227	CDC7/DTL/VPS4B/SIN3A/BRD4	5	4	ENSSSCG00000027251/ENSSSCG00000015600/ENSSSCG00000001880/ENSSSCG00000022227	1	ENSSSCG00000004893
BP	GO:0031935	regulation of chromatin silencing	5/1419	16/10877	0.0475928241271439	0.525227224395944	ENSSSCG00000008080/ENSSSCG00000030423/ENSSSCG00000008591/ENSSSCG00000001880/ENSSSCG00000010235	PHF2/MIER1/ATAD2B/SIN3A/SIRT1	5	2	ENSSSCG00000008080/ENSSSCG00000001880	3	ENSSSCG00000030423/ENSSSCG00000008591/ENSSSCG00000010235
BP	GO:0045738	negative regulation of DNA repair	5/1419	16/10877	0.0475928241271439	0.525227224395944	ENSSSCG00000021822/ENSSSCG00000027652/ENSSSCG00000024373/ENSSSCG00000016395/ENSSSCG00000012549	RNF169/KLHL15/TRIP12/RIF1/CXorf57	5	2	ENSSSCG00000021822/ENSSSCG00000024373	3	ENSSSCG00000027652/ENSSSCG00000016395/ENSSSCG00000012549
BP	GO:0061311	cell surface receptor signaling pathway involved in heart development	5/1419	16/10877	0.0475928241271439	0.525227224395944	ENSSSCG00000032613/ENSSSCG00000004755/ENSSSCG00000015874/ENSSSCG00000035859/ENSSSCG00000022155	SNAI1/DLL4/ACVR1/WNT5A/RBPJ	5	2	ENSSSCG00000015874/ENSSSCG00000035859	3	ENSSSCG00000032613/ENSSSCG00000004755/ENSSSCG00000022155
BP	GO:0070816	phosphorylation of RNA polymerase II C-terminal domain	5/1419	16/10877	0.0475928241271439	0.525227224395944	ENSSSCG00000029352/ENSSSCG00000017504/ENSSSCG00000004353/ENSSSCG00000015697/ENSSSCG00000022227	CCNL1/CDK12/CCNC/-/BRD4	5	2	ENSSSCG00000017504/ENSSSCG00000022227	3	ENSSSCG00000029352/ENSSSCG00000004353/ENSSSCG00000015697
BP	GO:0071624	positive regulation of granulocyte chemotaxis	5/1419	16/10877	0.0475928241271439	0.525227224395944	ENSSSCG00000012131/ENSSSCG00000017466/ENSSSCG00000008953/ENSSSCG00000008954/ENSSSCG00000008959	MOSPD2/CCR7/CXCL8/-/CXCL2	5	0		5	ENSSSCG00000012131/ENSSSCG00000017466/ENSSSCG00000008953/ENSSSCG00000008954/ENSSSCG00000008959
BP	GO:0090077	foam cell differentiation	5/1419	16/10877	0.0475928241271439	0.525227224395944	ENSSSCG00000001952/ENSSSCG00000017255/ENSSSCG00000000006/ENSSSCG00000037449/ENSSSCG00000000068	NFKBIA/ABCA5/PPARA/CSF1/EP300	5	2	ENSSSCG00000000006/ENSSSCG00000000068	3	ENSSSCG00000001952/ENSSSCG00000017255/ENSSSCG00000037449
BP	GO:0002690	positive regulation of leukocyte chemotaxis	11/1419	49/10877	0.0476871574783722	0.525227224395944	ENSSSCG00000004595/ENSSSCG00000017705/ENSSSCG00000013410/ENSSSCG00000012131/ENSSSCG00000017466/ENSSSCG00000000804/ENSSSCG00000008953/ENSSSCG00000008954/ENSSSCG00000035859/ENSSSCG00000037449/ENSSSCG00000008959	ADAM10/CCL5/SWAP70/MOSPD2/CCR7/ANO6/CXCL8/-/WNT5A/CSF1/CXCL2	11	3	ENSSSCG00000013410/ENSSSCG00000000804/ENSSSCG00000035859	8	ENSSSCG00000004595/ENSSSCG00000017705/ENSSSCG00000012131/ENSSSCG00000017466/ENSSSCG00000008953/ENSSSCG00000008954/ENSSSCG00000037449/ENSSSCG00000008959
BP	GO:0002237	response to molecule of bacterial origin	28/1419	156/10877	0.0479193558125496	0.525227224395944	ENSSSCG00000001952/ENSSSCG00000006084/ENSSSCG00000035355/ENSSSCG00000017705/ENSSSCG00000016929/ENSSSCG00000016954/ENSSSCG00000030957/ENSSSCG00000024596/ENSSSCG00000027074/ENSSSCG00000029385/ENSSSCG00000039548/ENSSSCG00000017466/ENSSSCG00000016140/ENSSSCG00000004154/ENSSSCG00000017268/ENSSSCG00000008953/ENSSSCG00000008954/ENSSSCG00000035859/ENSSSCG00000008959/ENSSSCG00000038073/ENSSSCG00000010627/…	NFKBIA/MTDH/F2R/CCL5/PDE4D/ERBIN/NFKB1/NOCT/FER/LIAS/PTGFR/CCR7/FZD5/TNFAIP3/PRKCA/CXCL8/-/WNT5A/CXCL2/NOD2/PDCD4/LY96/SASH1/DAB2IP/PALM3/PDE4B/TNFRSF11A/CD180	28	11	ENSSSCG00000035355/ENSSSCG00000030957/ENSSSCG00000016140/ENSSSCG00000017268/ENSSSCG00000035859/ENSSSCG00000038073/ENSSSCG00000033175/ENSSSCG00000005524/ENSSSCG00000013767/ENSSSCG00000004898/ENSSSCG00000016957	17	ENSSSCG00000001952/ENSSSCG00000006084/ENSSSCG00000017705/ENSSSCG00000016929/ENSSSCG00000016954/ENSSSCG00000024596/ENSSSCG00000027074/ENSSSCG00000029385/ENSSSCG00000039548/ENSSSCG00000017466/ENSSSCG00000004154/ENSSSCG00000008953/ENSSSCG00000008954/ENSSSCG00000008959/ENSSSCG00000010627/ENSSSCG00000006175/ENSSSCG00000003805
BP	GO:0051249	regulation of lymphocyte activation	40/1419	236/10877	0.0480024902048217	0.525227224395944	ENSSSCG00000016916/ENSSSCG00000014277/ENSSSCG00000017705/ENSSSCG00000012713/ENSSSCG00000034012/ENSSSCG00000005240/ENSSSCG00000005267/ENSSSCG00000011848/ENSSSCG00000023724/ENSSSCG00000008346/ENSSSCG00000002917/ENSSSCG00000026268/ENSSSCG00000017466/ENSSSCG00000001565/ENSSSCG00000031498/ENSSSCG00000020931/ENSSSCG00000011081/ENSSSCG00000004154/ENSSSCG00000002740/ENSSSCG00000024722/ENSSSCG00000031954/…	IL6ST/IRF1/CCL5/ATP11C/CASP3/DOCK8/ANXA1/TFRC/ZBTB1/APLF/NFKBID/DLG5/CCR7/CDKN1A/PPP2R3C/MSH6/-/TNFAIP3/AP1G1/PIBF1/SLC39A10/ATAD5/RIF1/TMEM131L/EFNB3/NOD2/CYP26B1/LGALS1/ZC3H8/ATM/CD320/BAD/NFATC2/DROSHA/NRARP/ADA/ADORA2A/ZMIZ1/SIT1/ZP3	40	11	ENSSSCG00000005240/ENSSSCG00000026268/ENSSSCG00000020931/ENSSSCG00000002740/ENSSSCG00000009007/ENSSSCG00000017948/ENSSSCG00000038073/ENSSSCG00000008311/ENSSSCG00000007477/ENSSSCG00000016809/ENSSSCG00000010329	29	ENSSSCG00000016916/ENSSSCG00000014277/ENSSSCG00000017705/ENSSSCG00000012713/ENSSSCG00000034012/ENSSSCG00000005267/ENSSSCG00000011848/ENSSSCG00000023724/ENSSSCG00000008346/ENSSSCG00000002917/ENSSSCG00000017466/ENSSSCG00000001565/ENSSSCG00000031498/ENSSSCG00000011081/ENSSSCG00000004154/ENSSSCG00000024722/ENSSSCG00000031954/ENSSSCG00000035954/ENSSSCG00000016395/ENSSSCG00000033854/ENSSSCG00000008099/…
BP	GO:0007568	aging	19/1419	98/10877	0.0480076669396205	0.525227224395944	ENSSSCG00000003112/ENSSSCG00000006496/ENSSSCG00000031882/ENSSSCG00000008614/ENSSSCG00000011822/ENSSSCG00000016929/ENSSSCG00000010360/ENSSSCG00000012055/ENSSSCG00000005255/ENSSSCG00000025910/ENSSSCG00000001565/ENSSSCG00000020931/ENSSSCG00000011679/ENSSSCG00000007023/ENSSSCG00000017448/ENSSSCG00000010627/ENSSSCG00000010235/ENSSSCG00000025606/ENSSSCG00000010329	-/LMNA/PNPT1/SMC6/OPA1/PDE4D/BMPR1A/MORC3/SMC5/ZNF277/CDKN1A/MSH6/ATR/KAT6A/KRT14/PDCD4/SIRT1/ATM/ZMIZ1	19	3	ENSSSCG00000020931/ENSSSCG00000007023/ENSSSCG00000010329	16	ENSSSCG00000003112/ENSSSCG00000006496/ENSSSCG00000031882/ENSSSCG00000008614/ENSSSCG00000011822/ENSSSCG00000016929/ENSSSCG00000010360/ENSSSCG00000012055/ENSSSCG00000005255/ENSSSCG00000025910/ENSSSCG00000001565/ENSSSCG00000011679/ENSSSCG00000017448/ENSSSCG00000010627/ENSSSCG00000010235/ENSSSCG00000025606
BP	GO:0070302	regulation of stress-activated protein kinase signaling cascade	24/1419	130/10877	0.0481349570095759	0.525227224395944	ENSSSCG00000022689/ENSSSCG00000013312/ENSSSCG00000033228/ENSSSCG00000015801/ENSSSCG00000012110/ENSSSCG00000035249/ENSSSCG00000004192/ENSSSCG00000016140/ENSSSCG00000007056/ENSSSCG00000009671/ENSSSCG00000011739/ENSSSCG00000004037/ENSSSCG00000035859/ENSSSCG00000014920/ENSSSCG00000038073/ENSSSCG00000008496/ENSSSCG00000022126/ENSSSCG00000033175/ENSSSCG00000026733/ENSSSCG00000005524/ENSSSCG00000010448/…	GADD45B/HIPK3/SPAG9/TLR3/MID1/GADD45G/CTGF/FZD5/PLCB1/PBK/PDCD10/MAP3K4/WNT5A/FZD4/NOD2/EIF2AK2/EGFR/SASH1/HIPK2/DAB2IP/FAS/PHLPP1/TNFRSF11A/NCOR1	24	15	ENSSSCG00000012110/ENSSSCG00000004192/ENSSSCG00000016140/ENSSSCG00000004037/ENSSSCG00000035859/ENSSSCG00000014920/ENSSSCG00000038073/ENSSSCG00000022126/ENSSSCG00000033175/ENSSSCG00000026733/ENSSSCG00000005524/ENSSSCG00000010448/ENSSSCG00000004896/ENSSSCG00000004898/ENSSSCG00000018039	9	ENSSSCG00000022689/ENSSSCG00000013312/ENSSSCG00000033228/ENSSSCG00000015801/ENSSSCG00000035249/ENSSSCG00000007056/ENSSSCG00000009671/ENSSSCG00000011739/ENSSSCG00000008496
BP	GO:0071482	cellular response to light stimulus	12/1419	55/10877	0.0482570208350672	0.525227224395944	ENSSSCG00000023724/ENSSSCG00000001565/ENSSSCG00000009671/ENSSSCG00000011679/ENSSSCG00000015215/ENSSSCG00000029478/ENSSSCG00000013402/ENSSSCG00000010235/ENSSSCG00000028850/ENSSSCG00000007951/ENSSSCG00000000068/ENSSSCG00000007881	ZBTB1/CDKN1A/PBK/ATR/CHEK1/CUL4B/USP47/SIRT1/RPL26/CREBBP/EP300/ERCC4	12	3	ENSSSCG00000007951/ENSSSCG00000000068/ENSSSCG00000007881	9	ENSSSCG00000023724/ENSSSCG00000001565/ENSSSCG00000009671/ENSSSCG00000011679/ENSSSCG00000015215/ENSSSCG00000029478/ENSSSCG00000013402/ENSSSCG00000010235/ENSSSCG00000028850
BP	GO:0090279	regulation of calcium ion import	12/1419	55/10877	0.0482570208350672	0.525227224395944	ENSSSCG00000035355/ENSSSCG00000016929/ENSSSCG00000009217/ENSSSCG00000037719/ENSSSCG00000031493/ENSSSCG00000009125/ENSSSCG00000001975/ENSSSCG00000011681/ENSSSCG00000006231/ENSSSCG00000015136/ENSSSCG00000007691/ENSSSCG00000006390	F2R/PDE4D/PKD2/PDPK1/CYBA/ANK2/PRKD1/TRPC1/CHD7/UBASH3B/ZP3/CASQ1	12	7	ENSSSCG00000035355/ENSSSCG00000009217/ENSSSCG00000037719/ENSSSCG00000009125/ENSSSCG00000001975/ENSSSCG00000006231/ENSSSCG00000015136	5	ENSSSCG00000016929/ENSSSCG00000031493/ENSSSCG00000011681/ENSSSCG00000007691/ENSSSCG00000006390
BP	GO:0019079	viral genome replication	13/1419	61/10877	0.0483492888040232	0.525227224395944	ENSSSCG00000012252/ENSSSCG00000037653/ENSSSCG00000017705/ENSSSCG00000006983/ENSSSCG00000017473/ENSSSCG00000008953/ENSSSCG00000012727/ENSSSCG00000014211/ENSSSCG00000008496/ENSSSCG00000013664/ENSSSCG00000017069/ENSSSCG00000004032/ENSSSCG00000010454	DDX3X/RAB5A/CCL5/CNOT7/TOP2A/CXCL8/FMR1/YTHDC2/EIF2AK2/C19orf66/LARP1/PRKN/IFIT5	13	2	ENSSSCG00000017069/ENSSSCG00000004032	11	ENSSSCG00000012252/ENSSSCG00000037653/ENSSSCG00000017705/ENSSSCG00000006983/ENSSSCG00000017473/ENSSSCG00000008953/ENSSSCG00000012727/ENSSSCG00000014211/ENSSSCG00000008496/ENSSSCG00000013664/ENSSSCG00000010454
BP	GO:0006323	DNA packaging	18/1419	92/10877	0.0493177130202044	0.534417996921172	ENSSSCG00000009047/ENSSSCG00000005403/ENSSSCG00000024253/ENSSSCG00000011731/ENSSSCG00000000693/ENSSSCG00000012434/ENSSSCG00000017473/ENSSSCG00000010357/ENSSSCG00000015952/ENSSSCG00000004439/ENSSSCG00000009946/ENSSSCG00000031122/ENSSSCG00000015576/ENSSSCG00000007023/ENSSSCG00000033566/ENSSSCG00000033065/ENSSSCG00000024307/ENSSSCG00000034986	SMARCA5/SMC2/CTCF/SMC4/NCAPD2/ATRX/TOP2A/WAPL/HAT1/TSPYL4/SART3/HIST1H2BB/TPR/KAT6A/-/-/PRM2/HIST1H3E	18	5	ENSSSCG00000024253/ENSSSCG00000000693/ENSSSCG00000004439/ENSSSCG00000009946/ENSSSCG00000007023	13	ENSSSCG00000009047/ENSSSCG00000005403/ENSSSCG00000011731/ENSSSCG00000012434/ENSSSCG00000017473/ENSSSCG00000010357/ENSSSCG00000015952/ENSSSCG00000031122/ENSSSCG00000015576/ENSSSCG00000033566/ENSSSCG00000033065/ENSSSCG00000024307/ENSSSCG00000034986
BP	GO:0031349	positive regulation of defense response	32/1419	183/10877	0.0498091824803591	0.536958658756531	ENSSSCG00000001952/ENSSSCG00000027529/ENSSSCG00000014277/ENSSSCG00000038185/ENSSSCG00000015801/ENSSSCG00000036828/ENSSSCG00000003582/ENSSSCG00000016954/ENSSSCG00000005305/ENSSSCG00000027709/ENSSSCG00000017466/ENSSSCG00000004154/ENSSSCG00000029615/ENSSSCG00000002740/ENSSSCG00000037719/ENSSSCG00000024592/ENSSSCG00000031493/ENSSSCG00000035859/ENSSSCG00000006274/ENSSSCG00000038073/ENSSSCG00000010627/…	NFKBIA/BIRC3/IRF1/EREG/TLR3/SNX4/SMPDL3B/ERBIN/UNC13B/PARP9/CCR7/TNFAIP3/VAMP7/AP1G1/PDPK1/ANKRD17/CYBA/WNT5A/PRKDC/NOD2/PDCD4/SIN3A/POLR3G/PUM1/LY96/NOP53/RPS19/VAMP8/DAB2IP/TNFRSF11A/ZP3/CD180	32	13	ENSSSCG00000005305/ENSSSCG00000027709/ENSSSCG00000002740/ENSSSCG00000037719/ENSSSCG00000024592/ENSSSCG00000035859/ENSSSCG00000006274/ENSSSCG00000038073/ENSSSCG00000001880/ENSSSCG00000003591/ENSSSCG00000005524/ENSSSCG00000004898/ENSSSCG00000016957	19	ENSSSCG00000001952/ENSSSCG00000027529/ENSSSCG00000014277/ENSSSCG00000038185/ENSSSCG00000015801/ENSSSCG00000036828/ENSSSCG00000003582/ENSSSCG00000016954/ENSSSCG00000017466/ENSSSCG00000004154/ENSSSCG00000029615/ENSSSCG00000031493/ENSSSCG00000010627/ENSSSCG00000026233/ENSSSCG00000006175/ENSSSCG00000022774/ENSSSCG00000003042/ENSSSCG00000022820/ENSSSCG00000007691
BP	GO:0016072	rRNA metabolic process	27/1419	150/10877	0.0498247909165501	0.536958658756531	ENSSSCG00000006727/ENSSSCG00000016911/ENSSSCG00000022225/ENSSSCG00000008098/ENSSSCG00000008990/ENSSSCG00000001024/ENSSSCG00000034572/ENSSSCG00000021466/ENSSSCG00000002529/ENSSSCG00000026812/ENSSSCG00000031838/ENSSSCG00000010145/ENSSSCG00000020817/ENSSSCG00000003930/ENSSSCG00000034227/ENSSSCG00000031538/ENSSSCG00000028850/ENSSSCG00000008069/ENSSSCG00000024019/ENSSSCG00000021275/ENSSSCG00000022774/…	WDR3/SKIV2L2/NOP58/POLR1B/MRPL1/RIOK1/MPHOSPH6/BMT2/RPS21/EMG1/RPS27/HEATR1/RPS16/-/RPL35/ANG/RPL26/NOL8/-/DDX52/NOP53/RPS19/EXOSC4/WDR36/EXOSC8/DROSHA/DIS3L	27	6	ENSSSCG00000006727/ENSSSCG00000008098/ENSSSCG00000001024/ENSSSCG00000010145/ENSSSCG00000016809/ENSSSCG00000004941	21	ENSSSCG00000016911/ENSSSCG00000022225/ENSSSCG00000008990/ENSSSCG00000034572/ENSSSCG00000021466/ENSSSCG00000002529/ENSSSCG00000026812/ENSSSCG00000031838/ENSSSCG00000020817/ENSSSCG00000003930/ENSSSCG00000034227/ENSSSCG00000031538/ENSSSCG00000028850/ENSSSCG00000008069/ENSSSCG00000024019/ENSSSCG00000021275/ENSSSCG00000022774/ENSSSCG00000003042/ENSSSCG00000005925/ENSSSCG00000014199/ENSSSCG00000009358
BP	GO:0006473	protein acetylation	25/1419	137/10877	0.050033765227661	0.536958658756531	ENSSSCG00000024253/ENSSSCG00000009670/ENSSSCG00000027115/ENSSSCG00000031159/ENSSSCG00000017310/ENSSSCG00000011081/ENSSSCG00000015952/ENSSSCG00000011917/ENSSSCG00000015215/ENSSSCG00000027211/ENSSSCG00000009061/ENSSSCG00000023324/ENSSSCG00000003700/ENSSSCG00000007458/ENSSSCG00000007023/ENSSSCG00000011540/ENSSSCG00000017983/ENSSSCG00000007606/ENSSSCG00000001880/ENSSSCG00000011776/ENSSSCG00000010235/…	CTCF/ESCO2/-/BEND3/KANSL1/-/HAT1/-/CHEK1/EPC2/NAA15/KMT2A/ESCO1/NCOA3/KAT6A/SETD5/PER1/TRRAP/SIN3A/YEATS2/SIRT1/CREBBP/EP300/EP400/HCFC1	25	15	ENSSSCG00000024253/ENSSSCG00000027115/ENSSSCG00000031159/ENSSSCG00000017310/ENSSSCG00000023324/ENSSSCG00000007458/ENSSSCG00000007023/ENSSSCG00000011540/ENSSSCG00000007606/ENSSSCG00000001880/ENSSSCG00000011776/ENSSSCG00000007951/ENSSSCG00000000068/ENSSSCG00000028018/ENSSSCG00000012793	10	ENSSSCG00000009670/ENSSSCG00000011081/ENSSSCG00000015952/ENSSSCG00000011917/ENSSSCG00000015215/ENSSSCG00000027211/ENSSSCG00000009061/ENSSSCG00000003700/ENSSSCG00000017983/ENSSSCG00000010235
BP	GO:0016055	Wnt signaling pathway	39/1419	230/10877	0.0500764063499787	0.536958658756531	ENSSSCG00000012252/ENSSSCG00000037653/ENSSSCG00000040751/ENSSSCG00000005235/ENSSSCG00000012361/ENSSSCG00000010563/ENSSSCG00000036381/ENSSSCG00000011733/ENSSSCG00000030957/ENSSSCG00000025028/ENSSSCG00000005437/ENSSSCG00000004558/ENSSSCG00000013174/ENSSSCG00000016140/ENSSSCG00000034491/ENSSSCG00000004387/ENSSSCG00000030820/ENSSSCG00000011760/ENSSSCG00000014336/ENSSSCG00000035859/ENSSSCG00000014920/…	DDX3X/RAB5A/DDIT3/KANK1/AMER1/BTRC/RBMS3/-/NFKB1/-/KLF4/CSNK1G1/CTNND1/FZD5/PRICKLE1/FOXO3/STK4/TBL1XR1/EGR1/WNT5A/FZD4/SCEL/TNN/TMEM131L/USP34/RBPJ/LIMD1/ZNRF3/-/FAM53B/DAB2IP/NRARP/RNF146/SALL1/UBE2B/PRKN/APOE/TCF7L2/CTHRC1	39	23	ENSSSCG00000005235/ENSSSCG00000012361/ENSSSCG00000010563/ENSSSCG00000030957/ENSSSCG00000004558/ENSSSCG00000013174/ENSSSCG00000016140/ENSSSCG00000034491/ENSSSCG00000004387/ENSSSCG00000030820/ENSSSCG00000014336/ENSSSCG00000035859/ENSSSCG00000014920/ENSSSCG00000015507/ENSSSCG00000009007/ENSSSCG00000011313/ENSSSCG00000009971/ENSSSCG00000002440/ENSSSCG00000010732/ENSSSCG00000005524/ENSSSCG00000002836/…	16	ENSSSCG00000012252/ENSSSCG00000037653/ENSSSCG00000040751/ENSSSCG00000036381/ENSSSCG00000011733/ENSSSCG00000025028/ENSSSCG00000005437/ENSSSCG00000011760/ENSSSCG00000009474/ENSSSCG00000008382/ENSSSCG00000022155/ENSSSCG00000005844/ENSSSCG00000004217/ENSSSCG00000038953/ENSSSCG00000003088/ENSSSCG00000006051
BP	GO:0003006	developmental process involved in reproduction	61/1419	381/10877	0.0501669642254785	0.536958658756531	ENSSSCG00000005096/ENSSSCG00000032613/ENSSSCG00000015443/ENSSSCG00000038125/ENSSSCG00000011510/ENSSSCG00000006646/ENSSSCG00000005382/ENSSSCG00000027646/ENSSSCG00000015874/ENSSSCG00000002254/ENSSSCG00000038677/ENSSSCG00000021597/ENSSSCG00000009217/ENSSSCG00000010360/ENSSSCG00000010928/ENSSSCG00000012434/ENSSSCG00000012026/ENSSSCG00000036434/ENSSSCG00000039756/ENSSSCG00000016140/ENSSSCG00000016842/…	HIF1A/SNAI1/DLD/NUP210L/TMF1/ARNT/TGFBR1/TIPARP/ACVR1/NR2F2/GJB3/PHLDA2/PKD2/BMPR1A/KDM5B/ATRX/ADAMTS1/TPGS1/FOXC1/FZD5/NIPBL/MARF1/FOXO3/STK4/LHFPL2/KRT8/GPR3/FOSL1/SEMA3A/NME5/MAP3K4/SMAD5/WNT5A/FZD4/CSF1/PRKDC/PRKAR2A/ARID4A/LRP2/ABHD2/RBPJ/EGFR/SIRT1/NEURL1/ATM/GJB5/CHD7/-/TAF4/FANCC/-/ARID1A/IRX5/ADA/CCNB1IP1/SALL1/UBE2B/VGF/PRM2/KIF18A/ZP3	61	27	ENSSSCG00000006646/ENSSSCG00000015874/ENSSSCG00000002254/ENSSSCG00000009217/ENSSSCG00000010928/ENSSSCG00000012026/ENSSSCG00000039756/ENSSSCG00000016140/ENSSSCG00000029168/ENSSSCG00000004387/ENSSSCG00000030820/ENSSSCG00000028536/ENSSSCG00000004037/ENSSSCG00000035859/ENSSSCG00000014920/ENSSSCG00000006274/ENSSSCG00000011363/ENSSSCG00000040746/ENSSSCG00000001835/ENSSSCG00000022126/ENSSSCG00000010603/…	34	ENSSSCG00000005096/ENSSSCG00000032613/ENSSSCG00000015443/ENSSSCG00000038125/ENSSSCG00000011510/ENSSSCG00000005382/ENSSSCG00000027646/ENSSSCG00000038677/ENSSSCG00000021597/ENSSSCG00000010360/ENSSSCG00000012434/ENSSSCG00000036434/ENSSSCG00000016842/ENSSSCG00000000252/ENSSSCG00000003576/ENSSSCG00000012967/ENSSSCG00000015398/ENSSSCG00000027997/ENSSSCG00000014319/ENSSSCG00000037449/ENSSSCG00000005073/…
BP	GO:0060284	regulation of cell development	73/1419	465/10877	0.0504603762093627	0.538300690936478	ENSSSCG00000006530/ENSSSCG00000005096/ENSSSCG00000016916/ENSSSCG00000033228/ENSSSCG00000033025/ENSSSCG00000004339/ENSSSCG00000005235/ENSSSCG00000006994/ENSSSCG00000004755/ENSSSCG00000035746/ENSSSCG00000008406/ENSSSCG00000021586/ENSSSCG00000010030/ENSSSCG00000010360/ENSSSCG00000021893/ENSSSCG00000005437/ENSSSCG00000010457/ENSSSCG00000001021/ENSSSCG00000027410/ENSSSCG00000026268/ENSSSCG00000003107/…	EFNA1/HIF1A/IL6ST/SPAG9/C21orf91/UFL1/KANK1/PCM1/DLL4/ECT2/CCDC88A/ZHX2/EIF4ENIF1/BMPR1A/ROCK1/KLF4/KIF20B/RREB1/CBFA2T2/DLG5/ARHGAP35/NIPBL/SEMA3C/IL1RAP/VAMP7/KIF14/KIF13B/SSH1/FMR1/GPR3/SEMA7A/SEMA3A/WNT5A/CSF1/HOXD3/SEMA6A/AFDN/EIF4E/POU4F1/PRKAR2A/CAMSAP2/LRP2/ZNF609/EFNB3/SORL1/ATOH1/DOCK5/NEURL1/BAD/SIPA1L1/CHD7/TNFRSF12A/GOLGA4/ADRA2B/MACF1/RPS19/BNIP2/SYT1/LRIG2/-/WDR36/DAB2IP/UNC13A/PRK…	73	40	ENSSSCG00000005235/ENSSSCG00000021586/ENSSSCG00000010030/ENSSSCG00000001021/ENSSSCG00000027410/ENSSSCG00000026268/ENSSSCG00000003107/ENSSSCG00000010912/ENSSSCG00000009683/ENSSSCG00000009943/ENSSSCG00000035859/ENSSSCG00000015985/ENSSSCG00000014224/ENSSSCG00000004018/ENSSSCG00000025334/ENSSSCG00000011363/ENSSSCG00000027314/ENSSSCG00000040746/ENSSSCG00000004551/ENSSSCG00000017948/ENSSSCG00000015135/…	33	ENSSSCG00000006530/ENSSSCG00000005096/ENSSSCG00000016916/ENSSSCG00000033228/ENSSSCG00000033025/ENSSSCG00000004339/ENSSSCG00000006994/ENSSSCG00000004755/ENSSSCG00000035746/ENSSSCG00000008406/ENSSSCG00000010360/ENSSSCG00000021893/ENSSSCG00000005437/ENSSSCG00000010457/ENSSSCG00000016842/ENSSSCG00000023784/ENSSSCG00000021206/ENSSSCG00000029615/ENSSSCG00000012727/ENSSSCG00000003576/ENSSSCG00000023165/…
BP	GO:0043065	positive regulation of apoptotic process	51/1419	312/10877	0.0505388787002418	0.538300690936478	ENSSSCG00000032434/ENSSSCG00000022689/ENSSSCG00000005385/ENSSSCG00000003112/ENSSSCG00000004163/ENSSSCG00000012252/ENSSSCG00000037910/ENSSSCG00000035355/ENSSSCG00000017705/ENSSSCG00000011395/ENSSSCG00000040751/ENSSSCG00000034012/ENSSSCG00000016170/ENSSSCG00000005382/ENSSSCG00000026454/ENSSSCG00000010949/ENSSSCG00000005267/ENSSSCG00000035746/ENSSSCG00000022447/ENSSSCG00000009434/ENSSSCG00000035249/…	PLAUR/GADD45B/NR4A3/-/BCLAF1/DDX3X/DUSP6/F2R/CCL5/RBM5/DDIT3/CASP3/BARD1/TGFBR1/-/DAPK1/ANXA1/ECT2/F3/RGCC/GADD45G/UNC13B/NFKBID/TOP2A/ANO6/SKIL/FOXO3/STK4/CASP8AP2/HIP1/WNT5A/PRKDC/POU4F1/USP27X/PDCD4/STK17B/ATPIF1/ZC3H8/SIRT1/RPL26/GSDME/NEURL1/ATM/BAD/PDCD1/TNFRSF12A/TP53BP2/DAB2IP/FAS/ADORA2A/EPHA7	51	19	ENSSSCG00000037910/ENSSSCG00000035355/ENSSSCG00000011395/ENSSSCG00000016170/ENSSSCG00000010949/ENSSSCG00000005305/ENSSSCG00000000804/ENSSSCG00000004387/ENSSSCG00000030820/ENSSSCG00000007700/ENSSSCG00000035859/ENSSSCG00000006274/ENSSSCG00000025334/ENSSSCG00000012305/ENSSSCG00000016716/ENSSSCG00000010603/ENSSSCG00000010894/ENSSSCG00000005524/ENSSSCG00000010448	32	ENSSSCG00000032434/ENSSSCG00000022689/ENSSSCG00000005385/ENSSSCG00000003112/ENSSSCG00000004163/ENSSSCG00000012252/ENSSSCG00000017705/ENSSSCG00000040751/ENSSSCG00000034012/ENSSSCG00000005382/ENSSSCG00000026454/ENSSSCG00000005267/ENSSSCG00000035746/ENSSSCG00000022447/ENSSSCG00000009434/ENSSSCG00000035249/ENSSSCG00000002917/ENSSSCG00000017473/ENSSSCG00000011746/ENSSSCG00000004331/ENSSSCG00000010627/…
BP	GO:2000779	regulation of double-strand break repair	9/1419	38/10877	0.0517136803026782	0.547703982764343	ENSSSCG00000023303/ENSSSCG00000021822/ENSSSCG00000027709/ENSSSCG00000037216/ENSSSCG00000027652/ENSSSCG00000024373/ENSSSCG00000016395/ENSSSCG00000012549/ENSSSCG00000014163	FIGNL1/RNF169/PARP9/PPP4R2/KLHL15/TRIP12/RIF1/CXorf57/SLF1	9	4	ENSSSCG00000023303/ENSSSCG00000021822/ENSSSCG00000027709/ENSSSCG00000024373	5	ENSSSCG00000037216/ENSSSCG00000027652/ENSSSCG00000016395/ENSSSCG00000012549/ENSSSCG00000014163
BP	GO:0040008	regulation of growth	56/1419	347/10877	0.0517208744831056	0.547703982764343	ENSSSCG00000032115/ENSSSCG00000005096/ENSSSCG00000012252/ENSSSCG00000037910/ENSSSCG00000011680/ENSSSCG00000031882/ENSSSCG00000004595/ENSSSCG00000013125/ENSSSCG00000005382/ENSSSCG00000011417/ENSSSCG00000006206/ENSSSCG00000015590/ENSSSCG00000021597/ENSSSCG00000010360/ENSSSCG00000004192/ENSSSCG00000007153/ENSSSCG00000023709/ENSSSCG00000012742/ENSSSCG00000001565/ENSSSCG00000039756/ENSSSCG00000016842/…	OSGIN1/HIF1A/DDX3X/DUSP6/PLS1/PNPT1/ADAM10/OSBP/TGFBR1/DCAF1/-/FLVCR1/PHLDA2/BMPR1A/CTGF/ATRN/PTPRJ/MTM1/CDKN1A/FOXC1/NIPBL/PLCB1/KIF14/STK4/ZNF639/IGFBP6/PIK3CA/NOTCH2/SEMA7A/USP47/SEMA3A/WNT5A/CSF1/RBPJ/MAPK11/EGFR/ACVR1B/SIRT1/NAIF1/CHD7/SERTAD1/TNFRSF12A/GOLGA4/MACF1/EXOSC4/SYT1/PLAC8/WDR36/UNC13A/PRKN/SYT17/CDKL5/CDH4/RAI1/ZP3/EPHA7	56	25	ENSSSCG00000037910/ENSSSCG00000013125/ENSSSCG00000011417/ENSSSCG00000015590/ENSSSCG00000004192/ENSSSCG00000007153/ENSSSCG00000023709/ENSSSCG00000012742/ENSSSCG00000039756/ENSSSCG00000010912/ENSSSCG00000030820/ENSSSCG00000006709/ENSSSCG00000035859/ENSSSCG00000022126/ENSSSCG00000000233/ENSSSCG00000005630/ENSSSCG00000006231/ENSSSCG00000003654/ENSSSCG00000000948/ENSSSCG00000013880/ENSSSCG00000004032/…	31	ENSSSCG00000032115/ENSSSCG00000005096/ENSSSCG00000012252/ENSSSCG00000011680/ENSSSCG00000031882/ENSSSCG00000004595/ENSSSCG00000005382/ENSSSCG00000006206/ENSSSCG00000021597/ENSSSCG00000010360/ENSSSCG00000001565/ENSSSCG00000016842/ENSSSCG00000007056/ENSSSCG00000038443/ENSSSCG00000000261/ENSSSCG00000030413/ENSSSCG00000023165/ENSSSCG00000013402/ENSSSCG00000015398/ENSSSCG00000037449/ENSSSCG00000022155/…
BP	GO:0009895	negative regulation of catabolic process	26/1419	144/10877	0.0517979722650959	0.547703982764343	ENSSSCG00000006530/ENSSSCG00000008452/ENSSSCG00000011853/ENSSSCG00000031888/ENSSSCG00000001973/ENSSSCG00000012742/ENSSSCG00000005208/ENSSSCG00000009671/ENSSSCG00000011340/ENSSSCG00000005449/ENSSSCG00000035133/ENSSSCG00000012727/ENSSSCG00000015273/ENSSSCG00000033766/ENSSSCG00000022126/ENSSSCG00000000033/ENSSSCG00000039613/ENSSSCG00000024623/ENSSSCG00000022774/ENSSSCG00000034581/ENSSSCG00000005524/…	EFNA1/LRPPRC/RUBCN/DDIT4/SCFD1/MTM1/RIC1/PBK/SMARCC1/PTPN3/MTMR9/FMR1/ATP2B4/ETFBKMT/EGFR/TSPO/SVIP/USP25/NOP53/LRIG2/DAB2IP/FMC1/CRTC3/HDAC4/CBFA2T3/CIDEA	26	13	ENSSSCG00000011853/ENSSSCG00000012742/ENSSSCG00000005208/ENSSSCG00000011340/ENSSSCG00000005449/ENSSSCG00000015273/ENSSSCG00000033766/ENSSSCG00000022126/ENSSSCG00000034581/ENSSSCG00000005524/ENSSSCG00000034090/ENSSSCG00000024777/ENSSSCG00000002648	13	ENSSSCG00000006530/ENSSSCG00000008452/ENSSSCG00000031888/ENSSSCG00000001973/ENSSSCG00000009671/ENSSSCG00000035133/ENSSSCG00000012727/ENSSSCG00000000033/ENSSSCG00000039613/ENSSSCG00000024623/ENSSSCG00000022774/ENSSSCG00000038700/ENSSSCG00000024644
BP	GO:0022407	regulation of cell-cell adhesion	38/1419	224/10877	0.0522457552198653	0.550502131726924	ENSSSCG00000005385/ENSSSCG00000016916/ENSSSCG00000014277/ENSSSCG00000017705/ENSSSCG00000034012/ENSSSCG00000005240/ENSSSCG00000013410/ENSSSCG00000005267/ENSSSCG00000009434/ENSSSCG00000011848/ENSSSCG00000023724/ENSSSCG00000005437/ENSSSCG00000038767/ENSSSCG00000002917/ENSSSCG00000026268/ENSSSCG00000017466/ENSSSCG00000011081/ENSSSCG00000017268/ENSSSCG00000000006/ENSSSCG00000035859/ENSSSCG00000009007/…	NR4A3/IL6ST/IRF1/CCL5/CASP3/DOCK8/SWAP70/ANXA1/RGCC/TFRC/ZBTB1/KLF4/MBP/NFKBID/DLG5/CCR7/-/PRKCA/PPARA/WNT5A/TMEM131L/EFNB3/CYP26B1/LGALS1/ZC3H8/BAD/MYO10/UBASH3B/DROSHA/NRARP/ADA/ADORA2A/-/ASS1/ZMIZ1/SIT1/ZP3/EPHA7	38	15	ENSSSCG00000005240/ENSSSCG00000013410/ENSSSCG00000038767/ENSSSCG00000026268/ENSSSCG00000017268/ENSSSCG00000000006/ENSSSCG00000035859/ENSSSCG00000009007/ENSSSCG00000017948/ENSSSCG00000008311/ENSSSCG00000016794/ENSSSCG00000015136/ENSSSCG00000016809/ENSSSCG00000016548/ENSSSCG00000010329	23	ENSSSCG00000005385/ENSSSCG00000016916/ENSSSCG00000014277/ENSSSCG00000017705/ENSSSCG00000034012/ENSSSCG00000005267/ENSSSCG00000009434/ENSSSCG00000011848/ENSSSCG00000023724/ENSSSCG00000005437/ENSSSCG00000002917/ENSSSCG00000017466/ENSSSCG00000011081/ENSSSCG00000033854/ENSSSCG00000008099/ENSSSCG00000013033/ENSSSCG00000005844/ENSSSCG00000021255/ENSSSCG00000010054/ENSSSCG00000005701/ENSSSCG00000005312/…
BP	GO:0048639	positive regulation of developmental growth	19/1419	99/10877	0.0524407801232884	0.550502131726924	ENSSSCG00000011680/ENSSSCG00000010360/ENSSSCG00000012742/ENSSSCG00000016842/ENSSSCG00000007056/ENSSSCG00000023165/ENSSSCG00000037449/ENSSSCG00000022155/ENSSSCG00000006231/ENSSSCG00000027130/ENSSSCG00000011243/ENSSSCG00000003654/ENSSSCG00000000948/ENSSSCG00000013880/ENSSSCG00000004032/ENSSSCG00000022200/ENSSSCG00000012156/ENSSSCG00000025784/ENSSSCG00000007691	PLS1/BMPR1A/MTM1/NIPBL/PLCB1/SEMA7A/CSF1/RBPJ/CHD7/TNFRSF12A/GOLGA4/MACF1/SYT1/UNC13A/PRKN/SYT17/CDKL5/CDH4/ZP3	19	9	ENSSSCG00000012742/ENSSSCG00000006231/ENSSSCG00000003654/ENSSSCG00000000948/ENSSSCG00000013880/ENSSSCG00000004032/ENSSSCG00000022200/ENSSSCG00000012156/ENSSSCG00000025784	10	ENSSSCG00000011680/ENSSSCG00000010360/ENSSSCG00000016842/ENSSSCG00000007056/ENSSSCG00000023165/ENSSSCG00000037449/ENSSSCG00000022155/ENSSSCG00000027130/ENSSSCG00000011243/ENSSSCG00000007691
BP	GO:2000021	regulation of ion homeostasis	19/1419	99/10877	0.0524407801232884	0.550502131726924	ENSSSCG00000035355/ENSSSCG00000001488/ENSSSCG00000040751/ENSSSCG00000016929/ENSSSCG00000009217/ENSSSCG00000004460/ENSSSCG00000031498/ENSSSCG00000005449/ENSSSCG00000037719/ENSSSCG00000031493/ENSSSCG00000009125/ENSSSCG00000001975/ENSSSCG00000040125/ENSSSCG00000011681/ENSSSCG00000006231/ENSSSCG00000015136/ENSSSCG00000004668/ENSSSCG00000006390/ENSSSCG00000024299	F2R/GCLC/DDIT3/PDE4D/PKD2/IBTK/PPP2R3C/PTPN3/PDPK1/CYBA/ANK2/PRKD1/NOL3/TRPC1/CHD7/UBASH3B/SLC30A4/CASQ1/SCN3B	19	10	ENSSSCG00000035355/ENSSSCG00000001488/ENSSSCG00000009217/ENSSSCG00000005449/ENSSSCG00000037719/ENSSSCG00000009125/ENSSSCG00000001975/ENSSSCG00000006231/ENSSSCG00000015136/ENSSSCG00000024299	9	ENSSSCG00000040751/ENSSSCG00000016929/ENSSSCG00000004460/ENSSSCG00000031498/ENSSSCG00000031493/ENSSSCG00000040125/ENSSSCG00000011681/ENSSSCG00000004668/ENSSSCG00000006390
BP	GO:0035295	tube development	65/1419	410/10877	0.0526196923379311	0.551055626953825	ENSSSCG00000005385/ENSSSCG00000005096/ENSSSCG00000009083/ENSSSCG00000010563/ENSSSCG00000009348/ENSSSCG00000005575/ENSSSCG00000038994/ENSSSCG00000004755/ENSSSCG00000015874/ENSSSCG00000024351/ENSSSCG00000009217/ENSSSCG00000010360/ENSSSCG00000010928/ENSSSCG00000004192/ENSSSCG00000012434/ENSSSCG00000026969/ENSSSCG00000010457/ENSSSCG00000027410/ENSSSCG00000026268/ENSSSCG00000003532/ENSSSCG00000029385/…	NR4A3/HIF1A/SPRY1/BTRC/STARD13/RC3H2/CLIC4/DLL4/ACVR1/MET/PKD2/BMPR1A/KDM5B/CTGF/ATRX/KRAS/KIF20B/CBFA2T2/DLG5/LUZP1/LIAS/NUP133/ARHGAP35/SEC24B/FOXC1/NIPBL/SEMA3C/-/KIF3A/PRICKLE1/STK4/ASXL1/SALL2/CXCL8/SMAD5/WNT5A/ATXN1L/CSF1/AHI1/GPR161/LRP2/RBPJ/EGFR/HEG1/-/CCDC39/CHD7/EP300/SHROOM3/DAB2IP/ARID1A/NRARP/ADA/SALL1/CRLF1/PGF/ESRP2/INTU/GORAB/DCHS1/KIF18A/HOXA1/CTHRC1/TBC1D32/EPHA7	65	34	ENSSSCG00000009083/ENSSSCG00000010563/ENSSSCG00000009348/ENSSSCG00000015874/ENSSSCG00000009217/ENSSSCG00000010928/ENSSSCG00000004192/ENSSSCG00000027410/ENSSSCG00000026268/ENSSSCG00000003532/ENSSSCG00000010189/ENSSSCG00000003107/ENSSSCG00000009142/ENSSSCG00000039756/ENSSSCG00000034491/ENSSSCG00000030820/ENSSSCG00000007248/ENSSSCG00000022705/ENSSSCG00000035859/ENSSSCG00000038917/ENSSSCG00000006302/…	31	ENSSSCG00000005385/ENSSSCG00000005096/ENSSSCG00000005575/ENSSSCG00000038994/ENSSSCG00000004755/ENSSSCG00000024351/ENSSSCG00000010360/ENSSSCG00000012434/ENSSSCG00000026969/ENSSSCG00000010457/ENSSSCG00000029385/ENSSSCG00000016842/ENSSSCG00000023784/ENSSSCG00000011081/ENSSSCG00000014283/ENSSSCG00000008953/ENSSSCG00000014319/ENSSSCG00000037449/ENSSSCG00000004166/ENSSSCG00000022155/ENSSSCG00000011768/…
BP	GO:0198738	cell-cell signaling by wnt	39/1419	231/10877	0.0529597730518801	0.551456896491725	ENSSSCG00000012252/ENSSSCG00000037653/ENSSSCG00000040751/ENSSSCG00000005235/ENSSSCG00000012361/ENSSSCG00000010563/ENSSSCG00000036381/ENSSSCG00000011733/ENSSSCG00000030957/ENSSSCG00000025028/ENSSSCG00000005437/ENSSSCG00000004558/ENSSSCG00000013174/ENSSSCG00000016140/ENSSSCG00000034491/ENSSSCG00000004387/ENSSSCG00000030820/ENSSSCG00000011760/ENSSSCG00000014336/ENSSSCG00000035859/ENSSSCG00000014920/…	DDX3X/RAB5A/DDIT3/KANK1/AMER1/BTRC/RBMS3/-/NFKB1/-/KLF4/CSNK1G1/CTNND1/FZD5/PRICKLE1/FOXO3/STK4/TBL1XR1/EGR1/WNT5A/FZD4/SCEL/TNN/TMEM131L/USP34/RBPJ/LIMD1/ZNRF3/-/FAM53B/DAB2IP/NRARP/RNF146/SALL1/UBE2B/PRKN/APOE/TCF7L2/CTHRC1	39	23	ENSSSCG00000005235/ENSSSCG00000012361/ENSSSCG00000010563/ENSSSCG00000030957/ENSSSCG00000004558/ENSSSCG00000013174/ENSSSCG00000016140/ENSSSCG00000034491/ENSSSCG00000004387/ENSSSCG00000030820/ENSSSCG00000014336/ENSSSCG00000035859/ENSSSCG00000014920/ENSSSCG00000015507/ENSSSCG00000009007/ENSSSCG00000011313/ENSSSCG00000009971/ENSSSCG00000002440/ENSSSCG00000010732/ENSSSCG00000005524/ENSSSCG00000002836/…	16	ENSSSCG00000012252/ENSSSCG00000037653/ENSSSCG00000040751/ENSSSCG00000036381/ENSSSCG00000011733/ENSSSCG00000025028/ENSSSCG00000005437/ENSSSCG00000011760/ENSSSCG00000009474/ENSSSCG00000008382/ENSSSCG00000022155/ENSSSCG00000005844/ENSSSCG00000004217/ENSSSCG00000038953/ENSSSCG00000003088/ENSSSCG00000006051
BP	GO:0032615	interleukin-12 production	7/1419	27/10877	0.053318949645403	0.551456896491725	ENSSSCG00000014277/ENSSSCG00000015801/ENSSSCG00000030957/ENSSSCG00000017466/ENSSSCG00000007056/ENSSSCG00000024722/ENSSSCG00000033171	IRF1/TLR3/NFKB1/CCR7/PLCB1/PIBF1/MAPK11	7	1	ENSSSCG00000030957	6	ENSSSCG00000014277/ENSSSCG00000015801/ENSSSCG00000017466/ENSSSCG00000007056/ENSSSCG00000024722/ENSSSCG00000033171
BP	GO:0090224	regulation of spindle organization	7/1419	27/10877	0.053318949645403	0.551456896491725	ENSSSCG00000010625/ENSSSCG00000012642/ENSSSCG00000020702/ENSSSCG00000004893/ENSSSCG00000015576/ENSSSCG00000012325/ENSSSCG00000015407	SMC3/STAG2/SENP6/VPS4B/TPR/SMC1A/GNAI1	7	1	ENSSSCG00000012325	6	ENSSSCG00000010625/ENSSSCG00000012642/ENSSSCG00000020702/ENSSSCG00000004893/ENSSSCG00000015576/ENSSSCG00000015407
BP	GO:0030330	DNA damage response, signal transduction by p53 class mediator	10/1419	44/10877	0.0533968230293101	0.551456896491725	ENSSSCG00000032613/ENSSSCG00000012434/ENSSSCG00000001565/ENSSSCG00000004387/ENSSSCG00000011679/ENSSSCG00000008357/ENSSSCG00000010235/ENSSSCG00000028850/ENSSSCG00000025606/ENSSSCG00000026733	SNAI1/ATRX/CDKN1A/FOXO3/ATR/SPRED2/SIRT1/RPL26/ATM/HIPK2	10	3	ENSSSCG00000004387/ENSSSCG00000008357/ENSSSCG00000026733	7	ENSSSCG00000032613/ENSSSCG00000012434/ENSSSCG00000001565/ENSSSCG00000011679/ENSSSCG00000010235/ENSSSCG00000028850/ENSSSCG00000025606
BP	GO:0042698	ovulation cycle	10/1419	44/10877	0.0533968230293101	0.551456896491725	ENSSSCG00000012026/ENSSSCG00000039756/ENSSSCG00000004387/ENSSSCG00000014336/ENSSSCG00000014920/ENSSSCG00000010235/ENSSSCG00000025606/ENSSSCG00000024694/ENSSSCG00000039053/ENSSSCG00000007691	ADAMTS1/FOXC1/FOXO3/EGR1/FZD4/SIRT1/ATM/TAF4/VGF/ZP3	10	6	ENSSSCG00000012026/ENSSSCG00000039756/ENSSSCG00000004387/ENSSSCG00000014336/ENSSSCG00000014920/ENSSSCG00000024694	4	ENSSSCG00000010235/ENSSSCG00000025606/ENSSSCG00000039053/ENSSSCG00000007691
BP	GO:0010498	proteasomal protein catabolic process	45/1419	272/10877	0.0534857214390943	0.551456896491725	ENSSSCG00000016653/ENSSSCG00000017043/ENSSSCG00000040663/ENSSSCG00000001488/ENSSSCG00000003928/ENSSSCG00000006066/ENSSSCG00000008740/ENSSSCG00000011510/ENSSSCG00000040751/ENSSSCG00000004339/ENSSSCG00000010563/ENSSSCG00000016017/ENSSSCG00000004717/ENSSSCG00000032332/ENSSSCG00000010802/ENSSSCG00000000927/ENSSSCG00000016564/ENSSSCG00000012742/ENSSSCG00000004589/ENSSSCG00000009671/ENSSSCG00000027652/…	DNAJB9/RNF145/HERPUD1/GCLC/PLK3/RNF19A/FBXL5/TMF1/DDIT3/UFL1/BTRC/DNAJC10/UBR1/SOCS4/UCHL5/TMTC3/UBE2H/MTM1/RNF111/PBK/KLHL15/PRICKLE1/KIF14/SMARCC1/FBXL3/TOPORS/TBL1XR1/CUL4B/TMEM67/PSMC6/UBXN2B/SPOPL/-/-/SVIP/YOD1/SIRT1/FBXW11/NOP53/DAB2IP/UBE2B/RNF216/PRKN/DZIP3/CBFA2T3	45	16	ENSSSCG00000017043/ENSSSCG00000001488/ENSSSCG00000008740/ENSSSCG00000010563/ENSSSCG00000016564/ENSSSCG00000012742/ENSSSCG00000004589/ENSSSCG00000034491/ENSSSCG00000010912/ENSSSCG00000011340/ENSSSCG00000006239/ENSSSCG00000023307/ENSSSCG00000005524/ENSSSCG00000021285/ENSSSCG00000004032/ENSSSCG00000002648	29	ENSSSCG00000016653/ENSSSCG00000040663/ENSSSCG00000003928/ENSSSCG00000006066/ENSSSCG00000011510/ENSSSCG00000040751/ENSSSCG00000004339/ENSSSCG00000016017/ENSSSCG00000004717/ENSSSCG00000032332/ENSSSCG00000010802/ENSSSCG00000000927/ENSSSCG00000009671/ENSSSCG00000027652/ENSSSCG00000009472/ENSSSCG00000011004/ENSSSCG00000011760/ENSSSCG00000029478/ENSSSCG00000006108/ENSSSCG00000005038/ENSSSCG00000032198/…
BP	GO:0006476	protein deacetylation	14/1419	68/10877	0.0535789570663785	0.551456896491725	ENSSSCG00000009338/ENSSSCG00000016842/ENSSSCG00000002526/ENSSSCG00000011760/ENSSSCG00000030423/ENSSSCG00000004432/ENSSSCG00000008357/ENSSSCG00000017983/ENSSSCG00000001880/ENSSSCG00000010235/ENSSSCG00000025182/ENSSSCG00000000068/ENSSSCG00000024777/ENSSSCG00000001947	FRY/NIPBL/RCOR1/TBL1XR1/MIER1/HDAC2/SPRED2/PER1/SIN3A/SIRT1/ELK4/EP300/HDAC4/BRMS1L	14	6	ENSSSCG00000009338/ENSSSCG00000002526/ENSSSCG00000008357/ENSSSCG00000001880/ENSSSCG00000000068/ENSSSCG00000024777	8	ENSSSCG00000016842/ENSSSCG00000011760/ENSSSCG00000030423/ENSSSCG00000004432/ENSSSCG00000017983/ENSSSCG00000010235/ENSSSCG00000025182/ENSSSCG00000001947
BP	GO:0031570	DNA integrity checkpoint	18/1419	93/10877	0.0540046074675599	0.551456896491725	ENSSSCG00000011213/ENSSSCG00000016291/ENSSSCG00000006127/ENSSSCG00000015602/ENSSSCG00000021966/ENSSSCG00000035639/ENSSSCG00000015600/ENSSSCG00000017473/ENSSSCG00000001565/ENSSSCG00000011679/ENSSSCG00000015215/ENSSSCG00000010240/ENSSSCG00000027557/ENSSSCG00000006274/ENSSSCG00000028850/ENSSSCG00000025606/ENSSSCG00000022774/ENSSSCG00000040355	TOP2B/GIGYF2/NBN/INTS7/TOPBP1/NAE1/DTL/TOP2A/CDKN1A/ATR/CHEK1/DNA2/CDC14B/PRKDC/RPL26/ATM/NOP53/TICRR	18	6	ENSSSCG00000016291/ENSSSCG00000015602/ENSSSCG00000015600/ENSSSCG00000027557/ENSSSCG00000006274/ENSSSCG00000040355	12	ENSSSCG00000011213/ENSSSCG00000006127/ENSSSCG00000021966/ENSSSCG00000035639/ENSSSCG00000017473/ENSSSCG00000001565/ENSSSCG00000011679/ENSSSCG00000015215/ENSSSCG00000010240/ENSSSCG00000028850/ENSSSCG00000025606/ENSSSCG00000022774
BP	GO:0050773	regulation of dendrite development	13/1419	62/10877	0.0541709261344169	0.551456896491725	ENSSSCG00000006530/ENSSSCG00000033025/ENSSSCG00000026268/ENSSSCG00000021206/ENSSSCG00000029615/ENSSSCG00000012727/ENSSSCG00000027314/ENSSSCG00000010603/ENSSSCG00000002332/ENSSSCG00000005524/ENSSSCG00000028759/ENSSSCG00000012156/ENSSSCG00000003088	EFNA1/C21orf91/DLG5/IL1RAP/VAMP7/FMR1/CAMSAP2/NEURL1/SIPA1L1/DAB2IP/ASAP1/CDKL5/APOE	13	7	ENSSSCG00000026268/ENSSSCG00000027314/ENSSSCG00000010603/ENSSSCG00000002332/ENSSSCG00000005524/ENSSSCG00000028759/ENSSSCG00000012156	6	ENSSSCG00000006530/ENSSSCG00000033025/ENSSSCG00000021206/ENSSSCG00000029615/ENSSSCG00000012727/ENSSSCG00000003088
BP	GO:0071456	cellular response to hypoxia	13/1419	62/10877	0.0541709261344169	0.551456896491725	ENSSSCG00000005096/ENSSSCG00000006496/ENSSSCG00000003928/ENSSSCG00000038410/ENSSSCG00000009434/ENSSSCG00000014336/ENSSSCG00000017513/ENSSSCG00000022155/ENSSSCG00000012181/ENSSSCG00000040513/ENSSSCG00000010235/ENSSSCG00000013033/ENSSSCG00000022774	HIF1A/LMNA/PLK3/CPEB2/RGCC/EGR1/NPEPPS/RBPJ/PDK3/AQP3/SIRT1/BAD/NOP53	13	3	ENSSSCG00000014336/ENSSSCG00000017513/ENSSSCG00000012181	10	ENSSSCG00000005096/ENSSSCG00000006496/ENSSSCG00000003928/ENSSSCG00000038410/ENSSSCG00000009434/ENSSSCG00000022155/ENSSSCG00000040513/ENSSSCG00000010235/ENSSSCG00000013033/ENSSSCG00000022774
BP	GO:0000079	regulation of cyclin-dependent protein serine/threonine kinase activity	11/1419	50/10877	0.0542232652628133	0.551456896491725	ENSSSCG00000029352/ENSSSCG00000012307/ENSSSCG00000034012/ENSSSCG00000002254/ENSSSCG00000009434/ENSSSCG00000009217/ENSSSCG00000001565/ENSSSCG00000004154/ENSSSCG00000004353/ENSSSCG00000022126/ENSSSCG00000015697	CCNL1/CCNB3/CASP3/NR2F2/RGCC/PKD2/CDKN1A/TNFAIP3/CCNC/EGFR/-	11	4	ENSSSCG00000012307/ENSSSCG00000002254/ENSSSCG00000009217/ENSSSCG00000022126	7	ENSSSCG00000029352/ENSSSCG00000034012/ENSSSCG00000009434/ENSSSCG00000001565/ENSSSCG00000004154/ENSSSCG00000004353/ENSSSCG00000015697
BP	GO:2000145	regulation of cell motility	75/1419	481/10877	0.0543731735965435	0.551456896491725	ENSSSCG00000006530/ENSSSCG00000010312/ENSSSCG00000005096/ENSSSCG00000006496/ENSSSCG00000035355/ENSSSCG00000004595/ENSSSCG00000033228/ENSSSCG00000032613/ENSSSCG00000017705/ENSSSCG00000005235/ENSSSCG00000009348/ENSSSCG00000005382/ENSSSCG00000027503/ENSSSCG00000016254/ENSSSCG00000005240/ENSSSCG00000013410/ENSSSCG00000038994/ENSSSCG00000004755/ENSSSCG00000012131/ENSSSCG00000015874/ENSSSCG00000010606/…	EFNA1/PLAU/HIF1A/LMNA/F2R/ADAM10/SPAG9/SNAI1/CCL5/KANK1/STARD13/TGFBR1/OSBPL8/CCL20/DOCK8/SWAP70/CLIC4/DLL4/MOSPD2/ACVR1/SLK/MET/ANXA1/NR2F2/RGCC/PHLDA2/BMPR1A/KLF4/FER/KIF20B/RREB1/DLG5/TACR1/PTPRJ/CCR7/ANO6/NIPBL/SEMA3C/PLCB1/KIF14/SP1/PDPK1/PDCD10/PRKCA/CXCL8/CLASP1/-/SEMA3A/CCAR1/WNT5A/CSF1/SEMA6A/MYLK/ZNF609/CXCL2/TIAM1/ABHD2/SORL1/ADAMTS9/EGFR/NAV3/ACVR1B/-/DOCK5/SASH1/MACF1/RHOD/LRIG2/DAB2…	75	35	ENSSSCG00000035355/ENSSSCG00000005235/ENSSSCG00000009348/ENSSSCG00000005240/ENSSSCG00000013410/ENSSSCG00000015874/ENSSSCG00000002254/ENSSSCG00000001021/ENSSSCG00000026268/ENSSSCG00000036008/ENSSSCG00000023709/ENSSSCG00000000804/ENSSSCG00000010912/ENSSSCG00000000272/ENSSSCG00000037719/ENSSSCG00000017268/ENSSSCG00000039157/ENSSSCG00000035859/ENSSSCG00000014224/ENSSSCG00000011867/ENSSSCG00000004551/…	40	ENSSSCG00000006530/ENSSSCG00000010312/ENSSSCG00000005096/ENSSSCG00000006496/ENSSSCG00000004595/ENSSSCG00000033228/ENSSSCG00000032613/ENSSSCG00000017705/ENSSSCG00000005382/ENSSSCG00000027503/ENSSSCG00000016254/ENSSSCG00000038994/ENSSSCG00000004755/ENSSSCG00000012131/ENSSSCG00000010606/ENSSSCG00000024351/ENSSSCG00000005267/ENSSSCG00000009434/ENSSSCG00000021597/ENSSSCG00000010360/ENSSSCG00000005437/…
BP	GO:0010906	regulation of glucose metabolic process	12/1419	56/10877	0.0544259039129685	0.551456896491725	ENSSSCG00000008398/ENSSSCG00000003776/ENSSSCG00000021597/ENSSSCG00000025729/ENSSSCG00000035037/ENSSSCG00000006194/ENSSSCG00000022797/ENSSSCG00000000006/ENSSSCG00000012181/ENSSSCG00000010235/ENSSSCG00000013033/ENSSSCG00000004032	PPP4R3B/ACADM/PHLDA2/IRS1/-/NCOA2/PPP1R3B/PPARA/PDK3/SIRT1/BAD/PRKN	12	6	ENSSSCG00000025729/ENSSSCG00000006194/ENSSSCG00000022797/ENSSSCG00000000006/ENSSSCG00000012181/ENSSSCG00000004032	6	ENSSSCG00000008398/ENSSSCG00000003776/ENSSSCG00000021597/ENSSSCG00000035037/ENSSSCG00000010235/ENSSSCG00000013033
BP	GO:0070555	response to interleukin-1	12/1419	56/10877	0.0544259039129685	0.551456896491725	ENSSSCG00000005096/ENSSSCG00000017705/ENSSSCG00000016254/ENSSSCG00000030957/ENSSSCG00000007056/ENSSSCG00000014336/ENSSSCG00000017268/ENSSSCG00000008953/ENSSSCG00000014211/ENSSSCG00000005524/ENSSSCG00000024777/ENSSSCG00000004898	HIF1A/CCL5/CCL20/NFKB1/PLCB1/EGR1/PRKCA/CXCL8/YTHDC2/DAB2IP/HDAC4/TNFRSF11A	12	6	ENSSSCG00000030957/ENSSSCG00000014336/ENSSSCG00000017268/ENSSSCG00000005524/ENSSSCG00000024777/ENSSSCG00000004898	6	ENSSSCG00000005096/ENSSSCG00000017705/ENSSSCG00000016254/ENSSSCG00000007056/ENSSSCG00000008953/ENSSSCG00000014211
BP	GO:0010608	posttranscriptional regulation of gene expression	42/1419	252/10877	0.0548064697719817	0.554027438644083	ENSSSCG00000027594/ENSSSCG00000012252/ENSSSCG00000008452/ENSSSCG00000016907/ENSSSCG00000016291/ENSSSCG00000003155/ENSSSCG00000011769/ENSSSCG00000006033/ENSSSCG00000008180/ENSSSCG00000010949/ENSSSCG00000005575/ENSSSCG00000036381/ENSSSCG00000011162/ENSSSCG00000038410/ENSSSCG00000024916/ENSSSCG00000024596/ENSSSCG00000006983/ENSSSCG00000010030/ENSSSCG00000017066/ENSSSCG00000028225/ENSSSCG00000027709/…	USP16/DDX3X/LRPPRC/DHX29/GIGYF2/PPP1R15A/FXR1/EIF3E/EIF5B/DAPK1/RC3H2/RBMS3/LARP4B/CPEB2/DHX36/NOCT/CNOT7/EIF4ENIF1/GEMIN5/DICER1/PARP9/LARP4/FOXO3/TNRC6C/UHMK1/FMR1/TNRC6B/TPR/EIF4E/SECISBP2L/PER1/EIF2AK2/EGFR/PUM1/LIMD1/RPL26/NEURL1/UQCC2/LARP1/DROSHA/TRMT10C/NCOR1	42	17	ENSSSCG00000016291/ENSSSCG00000010949/ENSSSCG00000011162/ENSSSCG00000010030/ENSSSCG00000017066/ENSSSCG00000028225/ENSSSCG00000027709/ENSSSCG00000004387/ENSSSCG00000034373/ENSSSCG00000000078/ENSSSCG00000022126/ENSSSCG00000003591/ENSSSCG00000011313/ENSSSCG00000010603/ENSSSCG00000017069/ENSSSCG00000016809/ENSSSCG00000018039	25	ENSSSCG00000027594/ENSSSCG00000012252/ENSSSCG00000008452/ENSSSCG00000016907/ENSSSCG00000003155/ENSSSCG00000011769/ENSSSCG00000006033/ENSSSCG00000008180/ENSSSCG00000005575/ENSSSCG00000036381/ENSSSCG00000038410/ENSSSCG00000024916/ENSSSCG00000024596/ENSSSCG00000006983/ENSSSCG00000028516/ENSSSCG00000006342/ENSSSCG00000012727/ENSSSCG00000015576/ENSSSCG00000028420/ENSSSCG00000004653/ENSSSCG00000017983/…
BP	GO:0003007	heart morphogenesis	28/1419	158/10877	0.0549556069933286	0.554252045588605	ENSSSCG00000006530/ENSSSCG00000005096/ENSSSCG00000032613/ENSSSCG00000005382/ENSSSCG00000004755/ENSSSCG00000015874/ENSSSCG00000009217/ENSSSCG00000010360/ENSSSCG00000012026/ENSSSCG00000009142/ENSSSCG00000039756/ENSSSCG00000016842/ENSSSCG00000023784/ENSSSCG00000014283/ENSSSCG00000007248/ENSSSCG00000006709/ENSSSCG00000035859/ENSSSCG00000004166/ENSSSCG00000025334/ENSSSCG00000040746/ENSSSCG00000022155/…	EFNA1/HIF1A/SNAI1/TGFBR1/DLL4/ACVR1/PKD2/BMPR1A/ADAMTS1/SEC24B/FOXC1/NIPBL/SEMA3C/KIF3A/ASXL1/NOTCH2/WNT5A/AHI1/POU4F1/LRP2/RBPJ/TGFBR3/HEG1/CCDC39/CHD7/TNNC1/DCHS1/ZMIZ1	28	15	ENSSSCG00000015874/ENSSSCG00000009217/ENSSSCG00000012026/ENSSSCG00000009142/ENSSSCG00000039756/ENSSSCG00000007248/ENSSSCG00000006709/ENSSSCG00000035859/ENSSSCG00000025334/ENSSSCG00000040746/ENSSSCG00000006911/ENSSSCG00000011859/ENSSSCG00000006231/ENSSSCG00000029189/ENSSSCG00000010329	13	ENSSSCG00000006530/ENSSSCG00000005096/ENSSSCG00000032613/ENSSSCG00000005382/ENSSSCG00000004755/ENSSSCG00000010360/ENSSSCG00000016842/ENSSSCG00000023784/ENSSSCG00000014283/ENSSSCG00000004166/ENSSSCG00000022155/ENSSSCG00000011768/ENSSSCG00000011441
BP	GO:0019439	aromatic compound catabolic process	35/1419	205/10877	0.0560363519813178	0.556942443914266	ENSSSCG00000006752/ENSSSCG00000024411/ENSSSCG00000016911/ENSSSCG00000031882/ENSSSCG00000008452/ENSSSCG00000006033/ENSSSCG00000016929/ENSSSCG00000006078/ENSSSCG00000021586/ENSSSCG00000024596/ENSSSCG00000006983/ENSSSCG00000028225/ENSSSCG00000021354/ENSSSCG00000034373/ENSSSCG00000014187/ENSSSCG00000026568/ENSSSCG00000012727/ENSSSCG00000010240/ENSSSCG00000000078/ENSSSCG00000030388/ENSSSCG00000011117/…	CSDE1/-/SKIV2L2/PNPT1/LRPPRC/EIF3E/PDE4D/POP1/ZHX2/NOCT/CNOT7/DICER1/CNOT4/TNRC6C/NUDT12/DNPH1/FMR1/DNA2/TNRC6B/UPP1/-/ATM/TATDN1/RNASEH2C/NT5C/LSM3/EXOSC4/EXOSC8/-/DROSHA/ADA/PDE4B/DNASE1L2/CIDEA/DIS3L	35	10	ENSSSCG00000024411/ENSSSCG00000006078/ENSSSCG00000021586/ENSSSCG00000028225/ENSSSCG00000021354/ENSSSCG00000034373/ENSSSCG00000000078/ENSSSCG00000016809/ENSSSCG00000024587/ENSSSCG00000004941	25	ENSSSCG00000006752/ENSSSCG00000016911/ENSSSCG00000031882/ENSSSCG00000008452/ENSSSCG00000006033/ENSSSCG00000016929/ENSSSCG00000024596/ENSSSCG00000006983/ENSSSCG00000014187/ENSSSCG00000026568/ENSSSCG00000012727/ENSSSCG00000010240/ENSSSCG00000030388/ENSSSCG00000011117/ENSSSCG00000025606/ENSSSCG00000030603/ENSSSCG00000012979/ENSSSCG00000028210/ENSSSCG00000011601/ENSSSCG00000005925/ENSSSCG00000009358/…
BP	GO:0071901	negative regulation of protein serine/threonine kinase activity	16/1419	81/10877	0.0569704703213868	0.556942443914266	ENSSSCG00000013312/ENSSSCG00000037910/ENSSSCG00000009083/ENSSSCG00000014934/ENSSSCG00000034012/ENSSSCG00000002254/ENSSSCG00000032097/ENSSSCG00000023709/ENSSSCG00000001565/ENSSSCG00000004154/ENSSSCG00000011363/ENSSSCG00000008357/ENSSSCG00000015135/ENSSSCG00000010235/ENSSSCG00000005524/ENSSSCG00000003088	HIPK3/DUSP6/SPRY1/CHORDC1/CASP3/NR2F2/DUSP16/PTPRJ/CDKN1A/TNFAIP3/PRKAR2A/SPRED2/SORL1/SIRT1/DAB2IP/APOE	16	9	ENSSSCG00000037910/ENSSSCG00000009083/ENSSSCG00000002254/ENSSSCG00000032097/ENSSSCG00000023709/ENSSSCG00000011363/ENSSSCG00000008357/ENSSSCG00000015135/ENSSSCG00000005524	7	ENSSSCG00000013312/ENSSSCG00000014934/ENSSSCG00000034012/ENSSSCG00000001565/ENSSSCG00000004154/ENSSSCG00000010235/ENSSSCG00000003088
BP	GO:0072331	signal transduction by p53 class mediator	19/1419	100/10877	0.0571552302356657	0.556942443914266	ENSSSCG00000003112/ENSSSCG00000032613/ENSSSCG00000031888/ENSSSCG00000012434/ENSSSCG00000001565/ENSSSCG00000004387/ENSSSCG00000011679/ENSSSCG00000011004/ENSSSCG00000025334/ENSSSCG00000008357/ENSSSCG00000010235/ENSSSCG00000028850/ENSSSCG00000025606/ENSSSCG00000022774/ENSSSCG00000000068/ENSSSCG00000010894/ENSSSCG00000026733/ENSSSCG00000004032/ENSSSCG00000036139	-/SNAI1/DDIT4/ATRX/CDKN1A/FOXO3/ATR/TOPORS/POU4F1/SPRED2/SIRT1/RPL26/ATM/NOP53/EP300/TP53BP2/HIPK2/PRKN/RRM2B	19	7	ENSSSCG00000004387/ENSSSCG00000025334/ENSSSCG00000008357/ENSSSCG00000000068/ENSSSCG00000010894/ENSSSCG00000026733/ENSSSCG00000004032	12	ENSSSCG00000003112/ENSSSCG00000032613/ENSSSCG00000031888/ENSSSCG00000012434/ENSSSCG00000001565/ENSSSCG00000011679/ENSSSCG00000011004/ENSSSCG00000010235/ENSSSCG00000028850/ENSSSCG00000025606/ENSSSCG00000022774/ENSSSCG00000036139
BP	GO:0006970	response to osmotic stress	8/1419	33/10877	0.0573897327009827	0.556942443914266	ENSSSCG00000012252/ENSSSCG00000003928/ENSSSCG00000034012/ENSSSCG00000009217/ENSSSCG00000037719/ENSSSCG00000011867/ENSSSCG00000013033/ENSSSCG00000002243	DDX3X/PLK3/CASP3/PKD2/PDPK1/MYLK/BAD/SLC12A6	8	4	ENSSSCG00000009217/ENSSSCG00000037719/ENSSSCG00000011867/ENSSSCG00000002243	4	ENSSSCG00000012252/ENSSSCG00000003928/ENSSSCG00000034012/ENSSSCG00000013033
BP	GO:0016447	somatic recombination of immunoglobulin gene segments	8/1419	33/10877	0.0573897327009827	0.556942443914266	ENSSSCG00000006127/ENSSSCG00000013410/ENSSSCG00000011848/ENSSSCG00000008346/ENSSSCG00000020931/ENSSSCG00000035954/ENSSSCG00000006274/ENSSSCG00000016395	NBN/SWAP70/TFRC/APLF/MSH6/ATAD5/PRKDC/RIF1	8	3	ENSSSCG00000013410/ENSSSCG00000020931/ENSSSCG00000006274	5	ENSSSCG00000006127/ENSSSCG00000011848/ENSSSCG00000008346/ENSSSCG00000035954/ENSSSCG00000016395
BP	GO:0042771	intrinsic apoptotic signaling pathway in response to DNA damage by p53 class mediator	8/1419	33/10877	0.0573897327009827	0.556942443914266	ENSSSCG00000003112/ENSSSCG00000031888/ENSSSCG00000001565/ENSSSCG00000011004/ENSSSCG00000010235/ENSSSCG00000028850/ENSSSCG00000000068/ENSSSCG00000026733	-/DDIT4/CDKN1A/TOPORS/SIRT1/RPL26/EP300/HIPK2	8	2	ENSSSCG00000000068/ENSSSCG00000026733	6	ENSSSCG00000003112/ENSSSCG00000031888/ENSSSCG00000001565/ENSSSCG00000011004/ENSSSCG00000010235/ENSSSCG00000028850
BP	GO:0061647	histone H3-K9 modification	8/1419	33/10877	0.0573897327009827	0.556942443914266	ENSSSCG00000012434/ENSSSCG00000031159/ENSSSCG00000015215/ENSSSCG00000023324/ENSSSCG00000005073/ENSSSCG00000016395/ENSSSCG00000010235/ENSSSCG00000001061	ATRX/BEND3/CHEK1/KMT2A/ARID4A/RIF1/SIRT1/JARID2	8	3	ENSSSCG00000031159/ENSSSCG00000023324/ENSSSCG00000001061	5	ENSSSCG00000012434/ENSSSCG00000015215/ENSSSCG00000005073/ENSSSCG00000016395/ENSSSCG00000010235
BP	GO:0006270	DNA replication initiation	6/1419	22/10877	0.0574578019214578	0.556942443914266	ENSSSCG00000027251/ENSSSCG00000021966/ENSSSCG00000015668/ENSSSCG00000007047/ENSSSCG00000040355/ENSSSCG00000006095	CDC7/TOPBP1/ORC4/MCM8/TICRR/CCNE2	6	2	ENSSSCG00000027251/ENSSSCG00000040355	4	ENSSSCG00000021966/ENSSSCG00000015668/ENSSSCG00000007047/ENSSSCG00000006095
BP	GO:0034661	ncRNA catabolic process	6/1419	22/10877	0.0574578019214578	0.556942443914266	ENSSSCG00000031882/ENSSSCG00000006078/ENSSSCG00000005925/ENSSSCG00000009358/ENSSSCG00000016809/ENSSSCG00000004941	PNPT1/POP1/EXOSC4/EXOSC8/DROSHA/DIS3L	6	3	ENSSSCG00000006078/ENSSSCG00000016809/ENSSSCG00000004941	3	ENSSSCG00000031882/ENSSSCG00000005925/ENSSSCG00000009358
BP	GO:0043516	regulation of DNA damage response, signal transduction by p53 class mediator	6/1419	22/10877	0.0574578019214578	0.556942443914266	ENSSSCG00000032613/ENSSSCG00000011679/ENSSSCG00000008357/ENSSSCG00000010235/ENSSSCG00000028850/ENSSSCG00000025606	SNAI1/ATR/SPRED2/SIRT1/RPL26/ATM	6	1	ENSSSCG00000008357	5	ENSSSCG00000032613/ENSSSCG00000011679/ENSSSCG00000010235/ENSSSCG00000028850/ENSSSCG00000025606
BP	GO:0060317	cardiac epithelial to mesenchymal transition	6/1419	22/10877	0.0574578019214578	0.556942443914266	ENSSSCG00000006530/ENSSSCG00000032613/ENSSSCG00000005382/ENSSSCG00000015874/ENSSSCG00000022155/ENSSSCG00000006911	EFNA1/SNAI1/TGFBR1/ACVR1/RBPJ/TGFBR3	6	2	ENSSSCG00000015874/ENSSSCG00000006911	4	ENSSSCG00000006530/ENSSSCG00000032613/ENSSSCG00000005382/ENSSSCG00000022155
BP	GO:1900744	regulation of p38MAPK cascade	6/1419	22/10877	0.0574578019214578	0.556942443914266	ENSSSCG00000022689/ENSSSCG00000035249/ENSSSCG00000004037/ENSSSCG00000033175/ENSSSCG00000005524/ENSSSCG00000004896	GADD45B/GADD45G/MAP3K4/SASH1/DAB2IP/PHLPP1	6	4	ENSSSCG00000004037/ENSSSCG00000033175/ENSSSCG00000005524/ENSSSCG00000004896	2	ENSSSCG00000022689/ENSSSCG00000035249
BP	GO:0051607	defense response to virus	21/1419	113/10877	0.0579484438139508	0.556942443914266	ENSSSCG00000014277/ENSSSCG00000031888/ENSSSCG00000015801/ENSSSCG00000006983/ENSSSCG00000015782/ENSSSCG00000027709/ENSSSCG00000009055/ENSSSCG00000014119/ENSSSCG00000040575/ENSSSCG00000017330/ENSSSCG00000027660/ENSSSCG00000024592/ENSSSCG00000001880/ENSSSCG00000003591/ENSSSCG00000013664/ENSSSCG00000012076/ENSSSCG00000022774/ENSSSCG00000005925/ENSSSCG00000021285/ENSSSCG00000010454/ENSSSCG00000007260	IRF1/DDIT4/TLR3/CNOT7/IRF2/PARP9/ELMOD2/SERINC5/ISG15/MAP3K14/IFI44L/ANKRD17/SIN3A/PUM1/C19orf66/MX2/NOP53/EXOSC4/RNF216/IFIT5/BPIFA1	21	8	ENSSSCG00000015782/ENSSSCG00000027709/ENSSSCG00000014119/ENSSSCG00000024592/ENSSSCG00000001880/ENSSSCG00000003591/ENSSSCG00000012076/ENSSSCG00000021285	13	ENSSSCG00000014277/ENSSSCG00000031888/ENSSSCG00000015801/ENSSSCG00000006983/ENSSSCG00000009055/ENSSSCG00000040575/ENSSSCG00000017330/ENSSSCG00000027660/ENSSSCG00000013664/ENSSSCG00000022774/ENSSSCG00000005925/ENSSSCG00000010454/ENSSSCG00000007260
[truncated: 5,216 more rows]
