# Supplementary material for: Transcriptomic analysis reveals impact of gE/gI/TK deletions on host response to PRV infection
Source: Virol J. 2023 Dec 19;20:303. doi: 10.1186/s12985-023-02265-y (PMC10731697; doi:10.1186/s12985-023-02265-y)
Supplement: Supplementary file 7 — Supplementary Material 7: SD2017vsPK15_all_KEGGenrich [file 12985_2023_2265_MOESM7_ESM.xls]

KEGGID	Description	GeneRatio	BgRatio	pvalue	padj	geneID	geneName	keggID	Count	Up	Up_Gene_names	Down	Down_Gene_names
ssc03010	Ribosome	31/628	117/5126	1.73685698940781e-05	0.0048458310004478	ENSSSCG00000032111/ENSSSCG00000036114/ENSSSCG00000008990/novel.873/ENSSSCG00000002529/ENSSSCG00000004970/ENSSSCG00000031838/ENSSSCG00000029785/ENSSSCG00000033169/ENSSSCG00000001528/ENSSSCG00000012842/ENSSSCG00000020817/ENSSSCG00000039046/ENSSSCG00000003930/ENSSSCG00000040273/ENSSSCG00000034227/ENSSSCG00000035768/ENSSSCG00000009019/ENSSSCG00000009146/ENSSSCG00000014910/ENSSSCG00000028850/ENSSSCG00…	RPL7/-/MRPL1/-/RPS21/-/RPS27/RPS9/RPS15/RPS10/RPLP2/RPS16/RPL36A-HNRNPH2/-/-/RPL35/RPS15A/RPS3A/RPL34/-/RPL26/-/RPS26/MRPL12/RPL37/RPS19/-/-/-/RPL9/-	ssc:414418/ssc:100627256/ssc:100513028/ssc:100627662/ssc:100037996/ssc:100170119/ssc:100519021/ssc:100622613/ssc:397607/ssc:100155444/ssc:100513643/ssc:414397/ssc:100627401/ssc:100516861/ssc:100514796/ssc:397598/ssc:100626041/ssc:414390/ssc:100517840/ssc:100519675/ssc:100627662/ssc:100516385/ssc:100037997/ssc:100624982/ssc:100626973/ssc:100518254/ssc:100516393/ssc:100157118/ssc:100515520/ssc:1006…	31	1	novel.873	30	ENSSSCG00000032111/ENSSSCG00000036114/ENSSSCG00000008990/ENSSSCG00000002529/ENSSSCG00000004970/ENSSSCG00000031838/ENSSSCG00000029785/ENSSSCG00000033169/ENSSSCG00000001528/ENSSSCG00000012842/ENSSSCG00000020817/ENSSSCG00000039046/ENSSSCG00000003930/ENSSSCG00000040273/ENSSSCG00000034227/ENSSSCG00000035768/ENSSSCG00000009019/ENSSSCG00000009146/ENSSSCG00000014910/ENSSSCG00000028850/ENSSSCG00000036296/…
ssc04218	Cellular senescence	28/628	129/5126	0.00154953119435063	0.148050159800418	ENSSSCG00000022689/ENSSSCG00000013312/ENSSSCG00000006127/ENSSSCG00000008540/ENSSSCG00000012307/ENSSSCG00000010563/ENSSSCG00000005382/ENSSSCG00000030957/ENSSSCG00000004636/ENSSSCG00000035249/ENSSSCG00000026969/ENSSSCG00000003909/ENSSSCG00000001565/ENSSSCG00000004387/ENSSSCG00000011679/ENSSSCG00000015215/ENSSSCG00000030413/ENSSSCG00000008953/ENSSSCG00000021310/ENSSSCG00000005965/ENSSSCG00000029578/…	GADD45B/HIPK3/NBN/PPP1CB/CCNB3/BTRC/TGFBR1/NFKB1/TRPM7/GADD45G/KRAS/-/CDKN1A/FOXO3/ATR/CHEK1/PIK3CA/CXCL8/-/MYC/NFATC3/SIRT1/FBXW11/ATM/NFATC2/-/HIPK2/CCNE2	ssc:100621090/ssc:100515770/ssc:100153233/ssc:397378/ssc:100515638/ssc:100157842/ssc:396665/ssc:751869/ssc:100169932/ssc:100152997/ssc:100518251/ssc:100511937/ssc:100152215/ssc:733621/ssc:100516227/ssc:100511709/ssc:100621789/ssc:396880/ssc:100738197/ssc:448810/ssc:100739450/ssc:751859/ssc:100523218/ssc:100101922/ssc:100134969/ssc:100155762/ssc:100627515/ssc:100512048	28	10	ENSSSCG00000012307/ENSSSCG00000010563/ENSSSCG00000030957/ENSSSCG00000003909/ENSSSCG00000004387/ENSSSCG00000005965/ENSSSCG00000029578/ENSSSCG00000023307/ENSSSCG00000007477/ENSSSCG00000026733	18	ENSSSCG00000022689/ENSSSCG00000013312/ENSSSCG00000006127/ENSSSCG00000008540/ENSSSCG00000005382/ENSSSCG00000004636/ENSSSCG00000035249/ENSSSCG00000026969/ENSSSCG00000001565/ENSSSCG00000011679/ENSSSCG00000015215/ENSSSCG00000030413/ENSSSCG00000008953/ENSSSCG00000021310/ENSSSCG00000010235/ENSSSCG00000025606/ENSSSCG00000010214/ENSSSCG00000006095
ssc04110	Cell cycle	25/628	113/5126	0.00205899504646116	0.148050159800418	ENSSSCG00000022689/ENSSSCG00000010625/ENSSSCG00000036256/ENSSSCG00000027251/ENSSSCG00000012307/ENSSSCG00000004466/ENSSSCG00000012642/ENSSSCG00000035249/ENSSSCG00000017308/ENSSSCG00000008105/ENSSSCG00000001565/ENSSSCG00000011679/ENSSSCG00000015215/ENSSSCG00000004432/ENSSSCG00000033057/ENSSSCG00000027557/ENSSSCG00000006274/ENSSSCG00000005965/ENSSSCG00000015668/ENSSSCG00000012325/ENSSSCG00000025606/…	GADD45B/SMC3/MAD2L1/CDC7/CCNB3/TTK/STAG2/GADD45G/CDC27/ANAPC1/CDKN1A/ATR/CHEK1/HDAC2/ANAPC13/CDC14B/PRKDC/MYC/ORC4/SMC1A/ATM/CREBBP/EP300/-/CCNE2	ssc:100621090/ssc:100151864/ssc:100523455/ssc:100520671/ssc:100515638/ssc:100157649/ssc:100154944/ssc:100152997/ssc:100517185/ssc:100519830/ssc:100152215/ssc:100516227/ssc:100511709/ssc:100156170/ssc:100415776/ssc:100626260/ssc:100156379/ssc:448810/ssc:100519056/ssc:100523938/ssc:100101922/ssc:100620215/ssc:100156226/ssc:100155762/ssc:100512048	25	9	ENSSSCG00000027251/ENSSSCG00000012307/ENSSSCG00000008105/ENSSSCG00000027557/ENSSSCG00000006274/ENSSSCG00000005965/ENSSSCG00000012325/ENSSSCG00000007951/ENSSSCG00000000068	16	ENSSSCG00000022689/ENSSSCG00000010625/ENSSSCG00000036256/ENSSSCG00000004466/ENSSSCG00000012642/ENSSSCG00000035249/ENSSSCG00000017308/ENSSSCG00000001565/ENSSSCG00000011679/ENSSSCG00000015215/ENSSSCG00000004432/ENSSSCG00000033057/ENSSSCG00000015668/ENSSSCG00000025606/ENSSSCG00000010214/ENSSSCG00000006095
ssc04520	Adherens junction	16/628	61/5126	0.00212258293620671	0.148050159800418	ENSSSCG00000032613/ENSSSCG00000031942/ENSSSCG00000005382/ENSSSCG00000024351/ENSSSCG00000040184/ENSSSCG00000013174/ENSSSCG00000023709/ENSSSCG00000004018/ENSSSCG00000010494/ENSSSCG00000022126/ENSSSCG00000000504/ENSSSCG00000007951/ENSSSCG00000004854/ENSSSCG00000000068/ENSSSCG00000010313/ENSSSCG00000010638	SNAI1/YES1/TGFBR1/MET/LMO7/CTNND1/PTPRJ/AFDN/SORBS1/EGFR/PTPRB/CREBBP/-/EP300/VCL/TCF7L2	ssc:396583/ssc:100627112/ssc:396665/ssc:654328/ssc:100523918/ssc:100519699/ssc:100524973/ssc:100514741/ssc:100153151/ssc:397070/ssc:100156181/ssc:100620215/ssc:100736682/ssc:100156226/ssc:396974/ssc:100153922	16	12	ENSSSCG00000040184/ENSSSCG00000013174/ENSSSCG00000023709/ENSSSCG00000004018/ENSSSCG00000010494/ENSSSCG00000022126/ENSSSCG00000000504/ENSSSCG00000007951/ENSSSCG00000004854/ENSSSCG00000000068/ENSSSCG00000010313/ENSSSCG00000010638	4	ENSSSCG00000032613/ENSSSCG00000031942/ENSSSCG00000005382/ENSSSCG00000024351
ssc04668	TNF signaling pathway	19/628	89/5126	0.0100697603702172	0.455639237266185	ENSSSCG00000001952/ENSSSCG00000027529/ENSSSCG00000017705/ENSSSCG00000034012/ENSSSCG00000002383/ENSSSCG00000016254/ENSSSCG00000030957/ENSSSCG00000021068/ENSSSCG00000003909/ENSSSCG00000004154/ENSSSCG00000026940/ENSSSCG00000030413/ENSSSCG00000017330/ENSSSCG00000037449/ENSSSCG00000016520/ENSSSCG00000008959/ENSSSCG00000020705/ENSSSCG00000038073/ENSSSCG00000005524	NFKBIA/BIRC3/CCL5/CASP3/FOS/CCL20/NFKB1/TRAF5/-/TNFAIP3/CASP10/PIK3CA/MAP3K14/CSF1/CREB3L2/CXCL2/MAP3K8/NOD2/DAB2IP	ssc:406188/ssc:100622590/ssc:396613/ssc:397244/ssc:100144486/ssc:553951/ssc:751869/ssc:396616/ssc:100511937/ssc:100622156/ssc:100154896/ssc:100621789/ssc:100520402/ssc:100513084/ssc:100520468/ssc:414904/ssc:100622217/ssc:100125838/ssc:100628179	19	8	ENSSSCG00000002383/ENSSSCG00000030957/ENSSSCG00000021068/ENSSSCG00000003909/ENSSSCG00000026940/ENSSSCG00000016520/ENSSSCG00000038073/ENSSSCG00000005524	11	ENSSSCG00000001952/ENSSSCG00000027529/ENSSSCG00000017705/ENSSSCG00000034012/ENSSSCG00000016254/ENSSSCG00000004154/ENSSSCG00000030413/ENSSSCG00000017330/ENSSSCG00000037449/ENSSSCG00000008959/ENSSSCG00000020705
ssc05203	Viral carcinogenesis	27/628	143/5126	0.0133945816440222	0.455639237266185	ENSSSCG00000001952/ENSSSCG00000012252/ENSSSCG00000016916/ENSSSCG00000034012/ENSSSCG00000030957/ENSSSCG00000021068/ENSSSCG00000039888/ENSSSCG00000026969/ENSSSCG00000003909/ENSSSCG00000001565/ENSSSCG00000015215/ENSSSCG00000030413/ENSSSCG00000004432/ENSSSCG00000031122/ENSSSCG00000016520/ENSSSCG00000022155/ENSSSCG00000008496/ENSSSCG00000003488/ENSSSCG00000006138/ENSSSCG00000007951/ENSSSCG00000000068/…	NFKBIA/DDX3X/IL6ST/CASP3/NFKB1/TRAF5/STXBP5L/KRAS/-/CDKN1A/CHEK1/PIK3CA/HDAC2/HIST1H2BB/CREB3L2/RBPJ/EIF2AK2/UBR4/ATP6V0D2/CREBBP/EP300/-/HDAC4/CCNE2/GTF2A1/IRF7/-	ssc:406188/ssc:100515940/ssc:100037294/ssc:397244/ssc:751869/ssc:396616/ssc:100624061/ssc:100518251/ssc:100511937/ssc:100152215/ssc:100511709/ssc:100621789/ssc:100156170/ssc:110261486/ssc:100520468/ssc:100518262/ssc:397588/ssc:102161705/ssc:100521494/ssc:100620215/ssc:100156226/ssc:100155762/ssc:100624050/ssc:100512048/ssc:100154605/ssc:100037289/ssc:100158117	27	10	ENSSSCG00000030957/ENSSSCG00000021068/ENSSSCG00000039888/ENSSSCG00000003909/ENSSSCG00000016520/ENSSSCG00000003488/ENSSSCG00000007951/ENSSSCG00000000068/ENSSSCG00000024777/ENSSSCG00000012853	17	ENSSSCG00000001952/ENSSSCG00000012252/ENSSSCG00000016916/ENSSSCG00000034012/ENSSSCG00000026969/ENSSSCG00000001565/ENSSSCG00000015215/ENSSSCG00000030413/ENSSSCG00000004432/ENSSSCG00000031122/ENSSSCG00000022155/ENSSSCG00000008496/ENSSSCG00000006138/ENSSSCG00000010214/ENSSSCG00000006095/ENSSSCG00000002411/ENSSSCG00000034136
ssc04115	p53 signaling pathway	13/628	55/5126	0.0134711096989017	0.455639237266185	ENSSSCG00000022689/ENSSSCG00000003112/ENSSSCG00000034012/ENSSSCG00000017024/ENSSSCG00000035249/ENSSSCG00000001565/ENSSSCG00000011679/ENSSSCG00000015215/ENSSSCG00000025606/ENSSSCG00000010214/ENSSSCG00000036139/ENSSSCG00000006280/ENSSSCG00000006095	GADD45B/-/CASP3/CCNG1/GADD45G/CDKN1A/ATR/CHEK1/ATM/-/RRM2B/GORAB/CCNE2	ssc:100621090/ssc:100517403/ssc:397244/ssc:595110/ssc:100152997/ssc:100152215/ssc:100516227/ssc:100511709/ssc:100101922/ssc:100155762/ssc:100157205/ssc:100738993/ssc:100512048	13	0		13	ENSSSCG00000022689/ENSSSCG00000003112/ENSSSCG00000034012/ENSSSCG00000017024/ENSSSCG00000035249/ENSSSCG00000001565/ENSSSCG00000011679/ENSSSCG00000015215/ENSSSCG00000025606/ENSSSCG00000010214/ENSSSCG00000036139/ENSSSCG00000006280/ENSSSCG00000006095
ssc05210	Colorectal cancer	17/628	81/5126	0.0170590280794995	0.455639237266185	ENSSSCG00000022689/ENSSSCG00000003112/ENSSSCG00000038185/ENSSSCG00000034012/ENSSSCG00000002383/ENSSSCG00000005382/ENSSSCG00000035249/ENSSSCG00000026969/ENSSSCG00000003909/ENSSSCG00000001565/ENSSSCG00000020931/ENSSSCG00000030413/ENSSSCG00000032357/ENSSSCG00000005965/ENSSSCG00000022126/ENSSSCG00000040836/ENSSSCG00000010638	GADD45B/-/EREG/CASP3/FOS/TGFBR1/GADD45G/KRAS/-/CDKN1A/MSH6/PIK3CA/APPL1/MYC/EGFR/DCC/TCF7L2	ssc:100621090/ssc:100517403/ssc:100620969/ssc:397244/ssc:100144486/ssc:396665/ssc:100152997/ssc:100518251/ssc:100511937/ssc:100152215/ssc:100624450/ssc:100621789/ssc:100188978/ssc:448810/ssc:397070/ssc:100152102/ssc:100153922	17	7	ENSSSCG00000002383/ENSSSCG00000003909/ENSSSCG00000020931/ENSSSCG00000005965/ENSSSCG00000022126/ENSSSCG00000040836/ENSSSCG00000010638	10	ENSSSCG00000022689/ENSSSCG00000003112/ENSSSCG00000038185/ENSSSCG00000034012/ENSSSCG00000005382/ENSSSCG00000035249/ENSSSCG00000026969/ENSSSCG00000001565/ENSSSCG00000030413/ENSSSCG00000032357
ssc03460	Fanconi anemia pathway	11/628	45/5126	0.0173426573066351	0.455639237266185	ENSSSCG00000003820/ENSSSCG00000025703/ENSSSCG00000007954/ENSSSCG00000031356/ENSSSCG00000011679/ENSSSCG00000004529/ENSSSCG00000023886/ENSSSCG00000033654/ENSSSCG00000007881/ENSSSCG00000005000/ENSSSCG00000039950	USP1/REV3L/SLX4/HES1/ATR/POLI/-/FANCC/ERCC4/FANCM/RMI1	ssc:100523071/ssc:100513963/ssc:100515719/ssc:100499567/ssc:100516227/ssc:100525374/ssc:100624116/ssc:102158362/ssc:100516427/ssc:100155917/ssc:100517963	11	4	ENSSSCG00000007954/ENSSSCG00000031356/ENSSSCG00000033654/ENSSSCG00000007881	7	ENSSSCG00000003820/ENSSSCG00000025703/ENSSSCG00000011679/ENSSSCG00000004529/ENSSSCG00000023886/ENSSSCG00000005000/ENSSSCG00000039950
ssc04657	IL-17 signaling pathway	14/628	63/5126	0.0180462029656122	0.455639237266185	ENSSSCG00000001952/ENSSSCG00000004624/ENSSSCG00000034012/ENSSSCG00000002383/ENSSSCG00000016254/ENSSSCG00000030957/ENSSSCG00000021068/ENSSSCG00000031616/ENSSSCG00000004154/ENSSSCG00000008953/ENSSSCG00000012967/ENSSSCG00000008959/ENSSSCG00000024623/ENSSSCG00000037914	NFKBIA/-/CASP3/FOS/CCL20/NFKB1/TRAF5/FOSB/TNFAIP3/CXCL8/FOSL1/CXCL2/USP25/IL17RB	ssc:406188/ssc:396833/ssc:397244/ssc:100144486/ssc:553951/ssc:751869/ssc:396616/ssc:110261009/ssc:100622156/ssc:396880/ssc:100525205/ssc:414904/ssc:100628105/ssc:100156014	14	4	ENSSSCG00000002383/ENSSSCG00000030957/ENSSSCG00000021068/ENSSSCG00000037914	10	ENSSSCG00000001952/ENSSSCG00000004624/ENSSSCG00000034012/ENSSSCG00000016254/ENSSSCG00000031616/ENSSSCG00000004154/ENSSSCG00000008953/ENSSSCG00000012967/ENSSSCG00000008959/ENSSSCG00000024623
ssc04550	Signaling pathways regulating pluripotency of stem cells	21/628	108/5126	0.0200261502057265	0.455639237266185	ENSSSCG00000016916/ENSSSCG00000015874/ENSSSCG00000010360/ENSSSCG00000005437/ENSSSCG00000026969/ENSSSCG00000003909/ENSSSCG00000016140/ENSSSCG00000011746/ENSSSCG00000036083/ENSSSCG00000011081/ENSSSCG00000030413/ENSSSCG00000014319/ENSSSCG00000035859/ENSSSCG00000014920/ENSSSCG00000016395/ENSSSCG00000007023/ENSSSCG00000005965/ENSSSCG00000037564/ENSSSCG00000000233/ENSSSCG00000001061/ENSSSCG00000005215	IL6ST/ACVR1/BMPR1A/KLF4/KRAS/-/FZD5/SKIL/-/-/PIK3CA/SMAD5/WNT5A/FZD4/RIF1/KAT6A/MYC/OTX1/ACVR1B/JARID2/JAK2	ssc:100037294/ssc:100152307/ssc:100169652/ssc:595111/ssc:100518251/ssc:100511937/ssc:100519058/ssc:100153567/ssc:100522283/ssc:100520800/ssc:100621789/ssc:100624262/ssc:100627056/ssc:100520319/ssc:100622500/ssc:100523576/ssc:448810/ssc:100520485/ssc:100152462/ssc:100524569/ssc:397201	21	10	ENSSSCG00000015874/ENSSSCG00000003909/ENSSSCG00000016140/ENSSSCG00000035859/ENSSSCG00000014920/ENSSSCG00000007023/ENSSSCG00000005965/ENSSSCG00000037564/ENSSSCG00000000233/ENSSSCG00000001061	11	ENSSSCG00000016916/ENSSSCG00000010360/ENSSSCG00000005437/ENSSSCG00000026969/ENSSSCG00000011746/ENSSSCG00000036083/ENSSSCG00000011081/ENSSSCG00000030413/ENSSSCG00000014319/ENSSSCG00000016395/ENSSSCG00000005215
ssc01524	Platinum drug resistance	13/628	58/5126	0.0207795116187775	0.455639237266185	ENSSSCG00000027529/ENSSSCG00000003112/ENSSSCG00000011213/ENSSSCG00000034012/ENSSSCG00000025703/ENSSSCG00000025028/ENSSSCG00000003909/ENSSSCG00000017473/ENSSSCG00000001565/ENSSSCG00000020931/ENSSSCG00000037719/ENSSSCG00000030413/ENSSSCG00000025606	BIRC3/-/TOP2B/CASP3/REV3L/-/-/TOP2A/CDKN1A/MSH6/PDPK1/PIK3CA/ATM	ssc:100622590/ssc:100517403/ssc:100156319/ssc:397244/ssc:100513963/ssc:100037300/ssc:100511937/ssc:396917/ssc:100152215/ssc:100624450/ssc:100192445/ssc:100621789/ssc:100101922	13	3	ENSSSCG00000003909/ENSSSCG00000020931/ENSSSCG00000037719	10	ENSSSCG00000027529/ENSSSCG00000003112/ENSSSCG00000011213/ENSSSCG00000034012/ENSSSCG00000025703/ENSSSCG00000025028/ENSSSCG00000017473/ENSSSCG00000001565/ENSSSCG00000030413/ENSSSCG00000025606
ssc05166	HTLV-I infection	36/628	210/5126	0.0212305020948402	0.455639237266185	ENSSSCG00000001952/ENSSSCG00000038948/ENSSSCG00000036256/ENSSSCG00000002383/ENSSSCG00000005382/ENSSSCG00000030957/ENSSSCG00000025028/ENSSSCG00000011106/ENSSSCG00000026969/ENSSSCG00000017308/ENSSSCG00000003909/ENSSSCG00000034321/ENSSSCG00000008105/ENSSSCG00000001565/ENSSSCG00000016140/ENSSSCG00000028228/ENSSSCG00000011679/ENSSSCG00000005008/ENSSSCG00000014336/ENSSSCG00000015215/ENSSSCG00000030413/…	NFKBIA/ETS2/MAD2L1/FOS/TGFBR1/NFKB1/-/CREM/KRAS/CDC27/-/TP53INP1/ANAPC1/CDKN1A/FZD5/XPO1/ATR/POLE2/EGR1/CHEK1/PIK3CA/MAP3K14/FOSL1/WNT5A/FZD4/MYC/NFATC3/TRRAP/TSPO/NFYB/ATM/ELK4/CREBBP/NFATC2/EP300/CRTC3	ssc:406188/ssc:100154449/ssc:100523455/ssc:100144486/ssc:396665/ssc:751869/ssc:100037300/ssc:100512363/ssc:100518251/ssc:100517185/ssc:100511937/ssc:100157451/ssc:100519830/ssc:100152215/ssc:100519058/ssc:397330/ssc:100516227/ssc:100521651/ssc:100520726/ssc:100511709/ssc:100621789/ssc:100520402/ssc:100525205/ssc:100627056/ssc:100520319/ssc:448810/ssc:100739450/ssc:106509633/ssc:396592/ssc:1001575…	36	16	ENSSSCG00000002383/ENSSSCG00000030957/ENSSSCG00000003909/ENSSSCG00000034321/ENSSSCG00000008105/ENSSSCG00000016140/ENSSSCG00000014336/ENSSSCG00000035859/ENSSSCG00000014920/ENSSSCG00000005965/ENSSSCG00000029578/ENSSSCG00000007606/ENSSSCG00000007951/ENSSSCG00000007477/ENSSSCG00000000068/ENSSSCG00000034090	20	ENSSSCG00000001952/ENSSSCG00000038948/ENSSSCG00000036256/ENSSSCG00000005382/ENSSSCG00000025028/ENSSSCG00000011106/ENSSSCG00000026969/ENSSSCG00000017308/ENSSSCG00000001565/ENSSSCG00000028228/ENSSSCG00000011679/ENSSSCG00000005008/ENSSSCG00000015215/ENSSSCG00000030413/ENSSSCG00000017330/ENSSSCG00000012967/ENSSSCG00000000033/ENSSSCG00000000844/ENSSSCG00000025606/ENSSSCG00000025182
ssc05206	MicroRNAs in cancer	25/628	137/5126	0.0251543712966766	0.492797383113876	ENSSSCG00000010312/ENSSSCG00000011407/ENSSSCG00000031888/ENSSSCG00000034012/ENSSSCG00000017024/ENSSSCG00000030957/ENSSSCG00000024351/ENSSSCG00000025729/ENSSSCG00000021893/ENSSSCG00000026969/ENSSSCG00000016056/ENSSSCG00000028225/ENSSSCG00000001565/ENSSSCG00000011081/ENSSSCG00000006709/ENSSSCG00000015507/ENSSSCG00000005965/ENSSSCG00000010627/ENSSSCG00000022126/ENSSSCG00000010235/ENSSSCG00000025606/…	PLAU/RASSF1/DDIT4/CASP3/CCNG1/NFKB1/MET/IRS1/ROCK1/KRAS/GLS/DICER1/CDKN1A/-/NOTCH2/TNN/MYC/PDCD4/EGFR/SIRT1/ATM/CREBBP/EP300/CCNE2/CYP24A1	ssc:396985/ssc:100516830/ssc:100153821/ssc:397244/ssc:595110/ssc:751869/ssc:654328/ssc:100512686/ssc:397447/ssc:100518251/ssc:399525/ssc:100505387/ssc:100152215/ssc:100520800/ssc:100153369/ssc:102163961/ssc:448810/ssc:100157112/ssc:397070/ssc:751859/ssc:100101922/ssc:100620215/ssc:100156226/ssc:100512048/ssc:397145	25	10	ENSSSCG00000030957/ENSSSCG00000025729/ENSSSCG00000028225/ENSSSCG00000006709/ENSSSCG00000015507/ENSSSCG00000005965/ENSSSCG00000022126/ENSSSCG00000007951/ENSSSCG00000000068/ENSSSCG00000007486	15	ENSSSCG00000010312/ENSSSCG00000011407/ENSSSCG00000031888/ENSSSCG00000034012/ENSSSCG00000017024/ENSSSCG00000024351/ENSSSCG00000021893/ENSSSCG00000026969/ENSSSCG00000016056/ENSSSCG00000001565/ENSSSCG00000011081/ENSSSCG00000010627/ENSSSCG00000010235/ENSSSCG00000025606/ENSSSCG00000006095
ssc05202	Transcriptional misregulation in cancer	24/628	132/5126	0.0289991552937625	0.492797383113876	ENSSSCG00000010312/ENSSSCG00000022689/ENSSSCG00000005385/ENSSSCG00000037910/ENSSSCG00000040751/ENSSSCG00000023593/ENSSSCG00000030957/ENSSSCG00000024351/ENSSSCG00000035249/ENSSSCG00000011951/ENSSSCG00000001565/ENSSSCG00000011081/ENSSSCG00000000272/ENSSSCG00000008953/ENSSSCG00000010226/ENSSSCG00000038181/ENSSSCG00000004432/ENSSSCG00000023324/ENSSSCG00000005965/ENSSSCG00000001880/ENSSSCG00000025606/…	PLAU/GADD45B/NR4A3/DUSP6/DDIT3/AFF1/NFKB1/MET/GADD45G/NFKBIZ/CDKN1A/-/SP1/CXCL8/JMJD1C/CCNT1/HDAC2/KMT2A/MYC/SIN3A/ATM/ELK4/HIST1H3E/-	ssc:396985/ssc:100621090/ssc:397479/ssc:100622968/ssc:100240743/ssc:100739621/ssc:751869/ssc:654328/ssc:100152997/ssc:100520981/ssc:100152215/ssc:100520800/ssc:396575/ssc:396880/ssc:100157328/ssc:100737376/ssc:100156170/ssc:100623006/ssc:448810/ssc:100621221/ssc:100101922/ssc:100626141/ssc:100154511/ssc:100737861	24	8	ENSSSCG00000037910/ENSSSCG00000023593/ENSSSCG00000030957/ENSSSCG00000000272/ENSSSCG00000038181/ENSSSCG00000023324/ENSSSCG00000005965/ENSSSCG00000001880	16	ENSSSCG00000010312/ENSSSCG00000022689/ENSSSCG00000005385/ENSSSCG00000040751/ENSSSCG00000024351/ENSSSCG00000035249/ENSSSCG00000011951/ENSSSCG00000001565/ENSSSCG00000011081/ENSSSCG00000008953/ENSSSCG00000010226/ENSSSCG00000004432/ENSSSCG00000025606/ENSSSCG00000025182/ENSSSCG00000038945/ENSSSCG00000015697
ssc05161	Hepatitis B	21/628	113/5126	0.0318149528875474	0.492797383113876	ENSSSCG00000001952/ENSSSCG00000012252/ENSSSCG00000015801/ENSSSCG00000034012/ENSSSCG00000002383/ENSSSCG00000005382/ENSSSCG00000030957/ENSSSCG00000026969/ENSSSCG00000003909/ENSSSCG00000001565/ENSSSCG00000026940/ENSSSCG00000030413/ENSSSCG00000008953/ENSSSCG00000016520/ENSSSCG00000005965/ENSSSCG00000029578/ENSSSCG00000007951/ENSSSCG00000007477/ENSSSCG00000000068/ENSSSCG00000006095/ENSSSCG00000012853	NFKBIA/DDX3X/TLR3/CASP3/FOS/TGFBR1/NFKB1/KRAS/-/CDKN1A/CASP10/PIK3CA/CXCL8/CREB3L2/MYC/NFATC3/CREBBP/NFATC2/EP300/CCNE2/IRF7	ssc:406188/ssc:100515940/ssc:100037937/ssc:397244/ssc:100144486/ssc:396665/ssc:751869/ssc:100518251/ssc:100511937/ssc:100152215/ssc:100154896/ssc:100621789/ssc:396880/ssc:100520468/ssc:448810/ssc:100739450/ssc:100620215/ssc:100134969/ssc:100156226/ssc:100512048/ssc:100037289	21	11	ENSSSCG00000002383/ENSSSCG00000030957/ENSSSCG00000003909/ENSSSCG00000026940/ENSSSCG00000016520/ENSSSCG00000005965/ENSSSCG00000029578/ENSSSCG00000007951/ENSSSCG00000007477/ENSSSCG00000000068/ENSSSCG00000012853	10	ENSSSCG00000001952/ENSSSCG00000012252/ENSSSCG00000015801/ENSSSCG00000034012/ENSSSCG00000005382/ENSSSCG00000026969/ENSSSCG00000001565/ENSSSCG00000030413/ENSSSCG00000008953/ENSSSCG00000006095
ssc05167	Kaposi's sarcoma-associated herpesvirus infection	25/628	140/5126	0.0320067355624331	0.492797383113876	ENSSSCG00000001952/ENSSSCG00000005096/ENSSSCG00000016916/ENSSSCG00000015801/ENSSSCG00000034012/ENSSSCG00000002383/ENSSSCG00000030957/ENSSSCG00000037964/ENSSSCG00000003749/ENSSSCG00000026969/ENSSSCG00000003909/ENSSSCG00000001565/ENSSSCG00000030413/ENSSSCG00000008953/ENSSSCG00000008959/ENSSSCG00000005965/ENSSSCG00000029578/ENSSSCG00000008496/ENSSSCG00000007951/ENSSSCG00000007477/ENSSSCG00000000068/…	NFKBIA/HIF1A/IL6ST/TLR3/CASP3/FOS/NFKB1/GNG10/PIK3C3/KRAS/-/CDKN1A/PIK3CA/CXCL8/CXCL2/MYC/NFATC3/EIF2AK2/CREBBP/NFATC2/EP300/GNG11/GNB4/IRF7/JAK2	ssc:406188/ssc:396696/ssc:100037294/ssc:100037937/ssc:397244/ssc:100144486/ssc:751869/ssc:100515992/ssc:503700/ssc:100518251/ssc:100511937/ssc:100152215/ssc:100621789/ssc:396880/ssc:414904/ssc:448810/ssc:100739450/ssc:397588/ssc:100620215/ssc:100134969/ssc:100156226/ssc:100522202/ssc:100524280/ssc:100037289/ssc:397201	25	9	ENSSSCG00000002383/ENSSSCG00000030957/ENSSSCG00000003909/ENSSSCG00000005965/ENSSSCG00000029578/ENSSSCG00000007951/ENSSSCG00000007477/ENSSSCG00000000068/ENSSSCG00000012853	16	ENSSSCG00000001952/ENSSSCG00000005096/ENSSSCG00000016916/ENSSSCG00000015801/ENSSSCG00000034012/ENSSSCG00000037964/ENSSSCG00000003749/ENSSSCG00000026969/ENSSSCG00000001565/ENSSSCG00000030413/ENSSSCG00000008953/ENSSSCG00000008959/ENSSSCG00000008496/ENSSSCG00000015324/ENSSSCG00000037583/ENSSSCG00000005215
ssc05160	Hepatitis C	19/628	101/5126	0.0356608503035917	0.492797383113876	ENSSSCG00000007718/ENSSSCG00000001952/ENSSSCG00000014277/ENSSSCG00000015801/ENSSSCG00000006033/ENSSSCG00000040904/ENSSSCG00000030957/ENSSSCG00000012030/ENSSSCG00000026969/ENSSSCG00000003909/ENSSSCG00000001565/ENSSSCG00000037719/ENSSSCG00000030413/ENSSSCG00000008953/ENSSSCG00000000006/ENSSSCG00000008496/ENSSSCG00000022126/ENSSSCG00000017934/ENSSSCG00000012853	CLDN4/NFKBIA/IRF1/TLR3/EIF3E/CLDN1/NFKB1/CLDN8/KRAS/-/CDKN1A/PDPK1/PIK3CA/CXCL8/PPARA/EIF2AK2/EGFR/CLDN7/IRF7	ssc:733578/ssc:406188/ssc:396611/ssc:100037937/ssc:100156671/ssc:100625166/ssc:751869/ssc:100302021/ssc:100518251/ssc:100511937/ssc:100152215/ssc:100192445/ssc:100621789/ssc:396880/ssc:397239/ssc:397588/ssc:397070/ssc:100127486/ssc:100037289	19	8	ENSSSCG00000040904/ENSSSCG00000030957/ENSSSCG00000012030/ENSSSCG00000003909/ENSSSCG00000037719/ENSSSCG00000000006/ENSSSCG00000022126/ENSSSCG00000012853	11	ENSSSCG00000007718/ENSSSCG00000001952/ENSSSCG00000014277/ENSSSCG00000015801/ENSSSCG00000006033/ENSSSCG00000026969/ENSSSCG00000001565/ENSSSCG00000030413/ENSSSCG00000008953/ENSSSCG00000008496/ENSSSCG00000017934
ssc04919	Thyroid hormone signaling pathway	18/628	95/5126	0.0377086505384937	0.492797383113876	ENSSSCG00000005096/ENSSSCG00000015660/ENSSSCG00000026969/ENSSSCG00000003909/ENSSSCG00000007056/ENSSSCG00000037719/ENSSSCG00000006194/ENSSSCG00000030413/ENSSSCG00000006709/ENSSSCG00000004432/ENSSSCG00000017672/ENSSSCG00000015084/ENSSSCG00000007458/ENSSSCG00000005965/ENSSSCG00000001880/ENSSSCG00000007951/ENSSSCG00000000068/ENSSSCG00000029458	HIF1A/PFKFB2/KRAS/-/PLCB1/PDPK1/NCOA2/PIK3CA/NOTCH2/HDAC2/MED13/FXYD2/NCOA3/MYC/SIN3A/CREBBP/EP300/SLC16A2	ssc:396696/ssc:100523270/ssc:100518251/ssc:100511937/ssc:100152679/ssc:100192445/ssc:100135658/ssc:100621789/ssc:100153369/ssc:100156170/ssc:100628203/ssc:541593/ssc:100135659/ssc:448810/ssc:100621221/ssc:100620215/ssc:100156226/ssc:100513513	18	11	ENSSSCG00000015660/ENSSSCG00000003909/ENSSSCG00000037719/ENSSSCG00000006194/ENSSSCG00000006709/ENSSSCG00000007458/ENSSSCG00000005965/ENSSSCG00000001880/ENSSSCG00000007951/ENSSSCG00000000068/ENSSSCG00000029458	7	ENSSSCG00000005096/ENSSSCG00000026969/ENSSSCG00000007056/ENSSSCG00000030413/ENSSSCG00000004432/ENSSSCG00000017672/ENSSSCG00000015084
ssc03008	Ribosome biogenesis in eukaryotes	13/628	63/5126	0.0390068206329304	0.492797383113876	ENSSSCG00000006727/ENSSSCG00000006078/ENSSSCG00000022225/ENSSSCG00000039202/ENSSSCG00000001024/ENSSSCG00000028228/ENSSSCG00000036960/ENSSSCG00000022952/ENSSSCG00000007119/ENSSSCG00000026812/ENSSSCG00000004328/ENSSSCG00000014199/ENSSSCG00000037053	WDR3/POP1/NOP58/FCF1/RIOK1/XPO1/NOP10/NMD3/NXT1/EMG1/MDN1/WDR36/AK6	ssc:100154556/ssc:100739449/ssc:100156132/ssc:100524688/ssc:100157926/ssc:397330/ssc:100156164/ssc:100738482/ssc:100514739/ssc:100627558/ssc:100525725/ssc:100627271/ssc:106504175	13	4	ENSSSCG00000006727/ENSSSCG00000006078/ENSSSCG00000001024/ENSSSCG00000004328	9	ENSSSCG00000022225/ENSSSCG00000039202/ENSSSCG00000028228/ENSSSCG00000036960/ENSSSCG00000022952/ENSSSCG00000007119/ENSSSCG00000026812/ENSSSCG00000014199/ENSSSCG00000037053
ssc04024	cAMP signaling pathway	23/628	129/5126	0.0392310976839102	0.492797383113876	ENSSSCG00000001952/ENSSSCG00000035355/ENSSSCG00000008540/ENSSSCG00000002383/ENSSSCG00000016929/ENSSSCG00000032595/ENSSSCG00000030957/ENSSSCG00000021893/ENSSSCG00000003909/ENSSSCG00000030413/ENSSSCG00000000006/ENSSSCG00000023084/ENSSSCG00000012298/ENSSSCG00000015273/ENSSSCG00000004018/ENSSSCG00000015084/ENSSSCG00000016520/ENSSSCG00000012034/ENSSSCG00000007951/ENSSSCG00000000068/ENSSSCG00000015407/…	NFKBIA/F2R/PPP1CB/FOS/PDE4D/RAP1B/NFKB1/ROCK1/-/PIK3CA/PPARA/ATP2B2/CACNA1F/ATP2B4/AFDN/FXYD2/CREB3L2/TIAM1/CREBBP/EP300/GNAI1/ADORA2A/PDE4B	ssc:406188/ssc:100521609/ssc:397378/ssc:100144486/ssc:100037967/ssc:100152555/ssc:751869/ssc:397447/ssc:100511937/ssc:100621789/ssc:397239/ssc:100625418/ssc:100514745/ssc:100623420/ssc:100514741/ssc:541593/ssc:100520468/ssc:100524587/ssc:100620215/ssc:100156226/ssc:100144419/ssc:503661/ssc:100037941	23	12	ENSSSCG00000035355/ENSSSCG00000002383/ENSSSCG00000030957/ENSSSCG00000003909/ENSSSCG00000000006/ENSSSCG00000023084/ENSSSCG00000015273/ENSSSCG00000004018/ENSSSCG00000016520/ENSSSCG00000012034/ENSSSCG00000007951/ENSSSCG00000000068	11	ENSSSCG00000001952/ENSSSCG00000008540/ENSSSCG00000016929/ENSSSCG00000032595/ENSSSCG00000021893/ENSSSCG00000030413/ENSSSCG00000012298/ENSSSCG00000015084/ENSSSCG00000015407/ENSSSCG00000010054/ENSSSCG00000003805
ssc04068	FoxO signaling pathway	21/628	116/5126	0.0410307281672053	0.492797383113876	ENSSSCG00000022689/ENSSSCG00000003928/ENSSSCG00000016925/ENSSSCG00000012307/ENSSSCG00000005382/ENSSSCG00000006206/ENSSSCG00000009077/ENSSSCG00000035249/ENSSSCG00000025729/ENSSSCG00000026969/ENSSSCG00000003909/ENSSSCG00000001565/ENSSSCG00000004387/ENSSSCG00000030820/ENSSSCG00000037719/ENSSSCG00000030413/ENSSSCG00000022126/ENSSSCG00000010235/ENSSSCG00000025606/ENSSSCG00000007951/ENSSSCG00000000068	GADD45B/PLK3/PLK2/CCNB3/TGFBR1/-/HSPA4L/GADD45G/IRS1/KRAS/-/CDKN1A/FOXO3/STK4/PDPK1/PIK3CA/EGFR/SIRT1/ATM/CREBBP/EP300	ssc:100621090/ssc:397250/ssc:397251/ssc:100515638/ssc:396665/ssc:100521447/ssc:100517044/ssc:100152997/ssc:100512686/ssc:100518251/ssc:100511937/ssc:100152215/ssc:733621/ssc:100517317/ssc:100192445/ssc:100621789/ssc:397070/ssc:751859/ssc:100101922/ssc:100620215/ssc:100156226	21	10	ENSSSCG00000016925/ENSSSCG00000012307/ENSSSCG00000025729/ENSSSCG00000003909/ENSSSCG00000004387/ENSSSCG00000030820/ENSSSCG00000037719/ENSSSCG00000022126/ENSSSCG00000007951/ENSSSCG00000000068	11	ENSSSCG00000022689/ENSSSCG00000003928/ENSSSCG00000005382/ENSSSCG00000006206/ENSSSCG00000009077/ENSSSCG00000035249/ENSSSCG00000026969/ENSSSCG00000001565/ENSSSCG00000030413/ENSSSCG00000010235/ENSSSCG00000025606
ssc05213	Endometrial cancer	11/628	51/5126	0.041419344494905	0.492797383113876	ENSSSCG00000022689/ENSSSCG00000035249/ENSSSCG00000026969/ENSSSCG00000003909/ENSSSCG00000001565/ENSSSCG00000004387/ENSSSCG00000037719/ENSSSCG00000030413/ENSSSCG00000005965/ENSSSCG00000022126/ENSSSCG00000010638	GADD45B/GADD45G/KRAS/-/CDKN1A/FOXO3/PDPK1/PIK3CA/MYC/EGFR/TCF7L2	ssc:100621090/ssc:100152997/ssc:100518251/ssc:100511937/ssc:100152215/ssc:733621/ssc:100192445/ssc:100621789/ssc:448810/ssc:397070/ssc:100153922	11	6	ENSSSCG00000003909/ENSSSCG00000004387/ENSSSCG00000037719/ENSSSCG00000005965/ENSSSCG00000022126/ENSSSCG00000010638	5	ENSSSCG00000022689/ENSSSCG00000035249/ENSSSCG00000026969/ENSSSCG00000001565/ENSSSCG00000030413
ssc03013	RNA transport	23/628	130/5126	0.0423911727409785	0.492797383113876	ENSSSCG00000013223/ENSSSCG00000011769/ENSSSCG00000006033/ENSSSCG00000008180/ENSSSCG00000006078/ENSSSCG00000026034/ENSSSCG00000011803/ENSSSCG00000017066/ENSSSCG00000010189/ENSSSCG00000006251/ENSSSCG00000028228/ENSSSCG00000011529/ENSSSCG00000022952/ENSSSCG00000017514/ENSSSCG00000012727/ENSSSCG00000007119/ENSSSCG00000034444/ENSSSCG00000015576/ENSSSCG00000028420/ENSSSCG00000011117/ENSSSCG00000017054/…	NUP160/FXR1/EIF3E/EIF5B/POP1/NUP153/EIF4A2/GEMIN5/NUP133/TGS1/XPO1/TRNT1/NMD3/KPNB1/FMR1/NXT1/EIF4EBP2/TPR/EIF4E/-/CYFIP2/THOC2/-	ssc:100513973/ssc:100525539/ssc:100156671/ssc:100520783/ssc:100739449/ssc:100153581/ssc:100101928/ssc:100524914/ssc:100153047/ssc:100157730/ssc:397330/ssc:100153838/ssc:100738482/ssc:100518449/ssc:100155078/ssc:100514739/ssc:100523927/ssc:100520507/ssc:100038030/ssc:100621126/ssc:100523290/ssc:100154832/ssc:100524839	23	10	ENSSSCG00000013223/ENSSSCG00000006078/ENSSSCG00000026034/ENSSSCG00000017066/ENSSSCG00000010189/ENSSSCG00000006251/ENSSSCG00000017514/ENSSSCG00000034444/ENSSSCG00000017054/ENSSSCG00000024479	13	ENSSSCG00000011769/ENSSSCG00000006033/ENSSSCG00000008180/ENSSSCG00000011803/ENSSSCG00000028228/ENSSSCG00000011529/ENSSSCG00000022952/ENSSSCG00000012727/ENSSSCG00000007119/ENSSSCG00000015576/ENSSSCG00000028420/ENSSSCG00000011117/ENSSSCG00000012639
ssc05034	Alcoholism	18/628	97/5126	0.0452060189637798	0.504499171635783	ENSSSCG00000008540/ENSSSCG00000037964/ENSSSCG00000031616/ENSSSCG00000026969/ENSSSCG00000015952/ENSSSCG00000004432/ENSSSCG00000031122/ENSSSCG00000016520/ENSSSCG00000036080/ENSSSCG00000020671/ENSSSCG00000038945/ENSSSCG00000015407/ENSSSCG00000024777/ENSSSCG00000015324/ENSSSCG00000010054/ENSSSCG00000037583/ENSSSCG00000034595/ENSSSCG00000034136	PPP1CB/GNG10/FOSB/KRAS/HAT1/HDAC2/HIST1H2BB/CREB3L2/-/SLC18A2/HIST1H3E/GNAI1/HDAC4/GNG11/ADORA2A/GNB4/-/-	ssc:397378/ssc:100515992/ssc:110261009/ssc:100518251/ssc:100622317/ssc:100156170/ssc:110261486/ssc:100520468/ssc:100155734/ssc:100154950/ssc:100154511/ssc:100144419/ssc:100624050/ssc:100522202/ssc:503661/ssc:100524280/ssc:100157763/ssc:100158117	18	2	ENSSSCG00000016520/ENSSSCG00000024777	16	ENSSSCG00000008540/ENSSSCG00000037964/ENSSSCG00000031616/ENSSSCG00000026969/ENSSSCG00000015952/ENSSSCG00000004432/ENSSSCG00000031122/ENSSSCG00000036080/ENSSSCG00000020671/ENSSSCG00000038945/ENSSSCG00000015407/ENSSSCG00000015324/ENSSSCG00000010054/ENSSSCG00000037583/ENSSSCG00000034595/ENSSSCG00000034136
ssc05219	Bladder cancer	8/628	34/5126	0.0487778450301118	0.523423798592354	ENSSSCG00000011407/ENSSSCG00000010949/ENSSSCG00000026969/ENSSSCG00000001565/ENSSSCG00000008953/ENSSSCG00000005965/ENSSSCG00000022126/ENSSSCG00000031423	RASSF1/DAPK1/KRAS/CDKN1A/CXCL8/MYC/EGFR/UPK3A	ssc:100516830/ssc:100516103/ssc:100518251/ssc:100152215/ssc:396880/ssc:448810/ssc:397070/ssc:397558	8	3	ENSSSCG00000010949/ENSSSCG00000005965/ENSSSCG00000022126	5	ENSSSCG00000011407/ENSSSCG00000026969/ENSSSCG00000001565/ENSSSCG00000008953/ENSSSCG00000031423
ssc04210	Apoptosis	20/628	113/5126	0.0555610681911702	0.574131037975426	ENSSSCG00000022689/ENSSSCG00000001952/ENSSSCG00000027529/ENSSSCG00000003112/ENSSSCG00000006496/ENSSSCG00000040751/ENSSSCG00000034012/ENSSSCG00000002383/ENSSSCG00000030957/ENSSSCG00000035249/ENSSSCG00000025028/ENSSSCG00000026969/ENSSSCG00000003909/ENSSSCG00000026940/ENSSSCG00000037719/ENSSSCG00000030413/ENSSSCG00000017330/ENSSSCG00000006648/ENSSSCG00000025606/ENSSSCG00000005524	GADD45B/NFKBIA/BIRC3/-/LMNA/DDIT3/CASP3/FOS/NFKB1/GADD45G/-/KRAS/-/CASP10/PDPK1/PIK3CA/MAP3K14/CTSS/ATM/DAB2IP	ssc:100621090/ssc:406188/ssc:100622590/ssc:100517403/ssc:100126859/ssc:100240743/ssc:397244/ssc:100144486/ssc:751869/ssc:100152997/ssc:100037300/ssc:100518251/ssc:100511937/ssc:100154896/ssc:100192445/ssc:100621789/ssc:100520402/ssc:100153090/ssc:100101922/ssc:100628179	20	7	ENSSSCG00000002383/ENSSSCG00000030957/ENSSSCG00000003909/ENSSSCG00000026940/ENSSSCG00000037719/ENSSSCG00000006648/ENSSSCG00000005524	13	ENSSSCG00000022689/ENSSSCG00000001952/ENSSSCG00000027529/ENSSSCG00000003112/ENSSSCG00000006496/ENSSSCG00000040751/ENSSSCG00000034012/ENSSSCG00000035249/ENSSSCG00000025028/ENSSSCG00000026969/ENSSSCG00000030413/ENSSSCG00000017330/ENSSSCG00000025606
ssc04360	Axon guidance	24/628	142/5126	0.0610965856199672	0.608783835284673	ENSSSCG00000006530/ENSSSCG00000038562/ENSSSCG00000027206/ENSSSCG00000024351/ENSSSCG00000021893/ENSSSCG00000026969/ENSSSCG00000003909/ENSSSCG00000023784/ENSSSCG00000017791/ENSSSCG00000009943/ENSSSCG00000030413/ENSSSCG00000015398/ENSSSCG00000035859/ENSSSCG00000010651/ENSSSCG00000014224/ENSSSCG00000017948/ENSSSCG00000029578/ENSSSCG00000011681/ENSSSCG00000007477/ENSSSCG00000022726/ENSSSCG00000015407/…	EFNA1/RND1/PARD6B/MET/ROCK1/KRAS/-/SEMA3C/SSH2/SSH1/PIK3CA/SEMA3A/WNT5A/ABLIM1/SEMA6A/EFNB3/NFATC3/TRPC1/NFATC2/RHOD/GNAI1/DCC/SRGAP1/EPHA7	ssc:100144501/ssc:100737739/ssc:100151957/ssc:654328/ssc:397447/ssc:100518251/ssc:100511937/ssc:100624508/ssc:100520864/ssc:100157825/ssc:100621789/ssc:100620398/ssc:100627056/ssc:100154343/ssc:100522008/ssc:100135672/ssc:100739450/ssc:100156938/ssc:100134969/ssc:100625773/ssc:100144419/ssc:100152102/ssc:100623414/ssc:100154222	24	11	ENSSSCG00000003909/ENSSSCG00000017791/ENSSSCG00000009943/ENSSSCG00000035859/ENSSSCG00000010651/ENSSSCG00000014224/ENSSSCG00000017948/ENSSSCG00000029578/ENSSSCG00000007477/ENSSSCG00000040836/ENSSSCG00000029815	13	ENSSSCG00000006530/ENSSSCG00000038562/ENSSSCG00000027206/ENSSSCG00000024351/ENSSSCG00000021893/ENSSSCG00000026969/ENSSSCG00000023784/ENSSSCG00000030413/ENSSSCG00000015398/ENSSSCG00000011681/ENSSSCG00000022726/ENSSSCG00000015407/ENSSSCG00000004336
ssc04621	NOD-like receptor signaling pathway	20/628	115/5126	0.0646818934933225	0.622284423608172	ENSSSCG00000001952/ENSSSCG00000027529/ENSSSCG00000017705/ENSSSCG00000039285/ENSSSCG00000031262/ENSSSCG00000016954/ENSSSCG00000030957/ENSSSCG00000004636/ENSSSCG00000021068/ENSSSCG00000025028/ENSSSCG00000032360/ENSSSCG00000004154/ENSSSCG00000007056/ENSSSCG00000008953/ENSSSCG00000031493/ENSSSCG00000005453/ENSSSCG00000008959/ENSSSCG00000038073/ENSSSCG00000014997/ENSSSCG00000012853	NFKBIA/BIRC3/CCL5/MFN1/TXNIP/ERBIN/NFKB1/TRPM7/TRAF5/-/PANX1/TNFAIP3/PLCB1/CXCL8/CYBA/-/CXCL2/NOD2/-/IRF7	ssc:406188/ssc:100622590/ssc:396613/ssc:100627612/ssc:733688/ssc:100511418/ssc:751869/ssc:100169932/ssc:396616/ssc:100037300/ssc:100738603/ssc:100622156/ssc:100152679/ssc:396880/ssc:397507/ssc:397581/ssc:414904/ssc:100125838/ssc:100522887/ssc:100037289	20	6	ENSSSCG00000031262/ENSSSCG00000030957/ENSSSCG00000021068/ENSSSCG00000032360/ENSSSCG00000038073/ENSSSCG00000012853	14	ENSSSCG00000001952/ENSSSCG00000027529/ENSSSCG00000017705/ENSSSCG00000039285/ENSSSCG00000016954/ENSSSCG00000004636/ENSSSCG00000025028/ENSSSCG00000004154/ENSSSCG00000007056/ENSSSCG00000008953/ENSSSCG00000031493/ENSSSCG00000005453/ENSSSCG00000008959/ENSSSCG00000014997
ssc05222	Small cell lung cancer	14/628	75/5126	0.0688029237564366	0.629803519041119	ENSSSCG00000022689/ENSSSCG00000001952/ENSSSCG00000027529/ENSSSCG00000034012/ENSSSCG00000030957/ENSSSCG00000021068/ENSSSCG00000035249/ENSSSCG00000025028/ENSSSCG00000003909/ENSSSCG00000001565/ENSSSCG00000030413/ENSSSCG00000005965/ENSSSCG00000015555/ENSSSCG00000006095	GADD45B/NFKBIA/BIRC3/CASP3/NFKB1/TRAF5/GADD45G/-/-/CDKN1A/PIK3CA/MYC/LAMC1/CCNE2	ssc:100621090/ssc:406188/ssc:100622590/ssc:397244/ssc:751869/ssc:396616/ssc:100152997/ssc:100037300/ssc:100511937/ssc:100152215/ssc:100621789/ssc:448810/ssc:100514785/ssc:100512048	14	5	ENSSSCG00000030957/ENSSSCG00000021068/ENSSSCG00000003909/ENSSSCG00000005965/ENSSSCG00000015555	9	ENSSSCG00000022689/ENSSSCG00000001952/ENSSSCG00000027529/ENSSSCG00000034012/ENSSSCG00000035249/ENSSSCG00000025028/ENSSSCG00000001565/ENSSSCG00000030413/ENSSSCG00000006095
ssc04670	Leukocyte transendothelial migration	15/628	82/5126	0.0706838017378606	0.629803519041119	ENSSSCG00000007718/ENSSSCG00000040904/ENSSSCG00000032595/ENSSSCG00000012030/ENSSSCG00000021893/ENSSSCG00000013174/ENSSSCG00000001966/ENSSSCG00000003909/ENSSSCG00000003107/ENSSSCG00000030413/ENSSSCG00000031493/ENSSSCG00000004018/ENSSSCG00000017934/ENSSSCG00000010313/ENSSSCG00000015407	CLDN4/CLDN1/RAP1B/CLDN8/ROCK1/CTNND1/ARHGAP5/-/ARHGAP35/PIK3CA/CYBA/AFDN/CLDN7/VCL/GNAI1	ssc:733578/ssc:100625166/ssc:100152555/ssc:100302021/ssc:397447/ssc:100519699/ssc:100520849/ssc:100511937/ssc:100514580/ssc:100621789/ssc:397507/ssc:100514741/ssc:100127486/ssc:396974/ssc:100144419	15	7	ENSSSCG00000040904/ENSSSCG00000012030/ENSSSCG00000013174/ENSSSCG00000003909/ENSSSCG00000003107/ENSSSCG00000004018/ENSSSCG00000010313	8	ENSSSCG00000007718/ENSSSCG00000032595/ENSSSCG00000021893/ENSSSCG00000001966/ENSSSCG00000030413/ENSSSCG00000031493/ENSSSCG00000017934/ENSSSCG00000015407
ssc05223	Non-small cell lung cancer	11/628	56/5126	0.0741528927502006	0.629803519041119	ENSSSCG00000022689/ENSSSCG00000011407/ENSSSCG00000035249/ENSSSCG00000026969/ENSSSCG00000003909/ENSSSCG00000001565/ENSSSCG00000004387/ENSSSCG00000030820/ENSSSCG00000037719/ENSSSCG00000030413/ENSSSCG00000022126	GADD45B/RASSF1/GADD45G/KRAS/-/CDKN1A/FOXO3/STK4/PDPK1/PIK3CA/EGFR	ssc:100621090/ssc:100516830/ssc:100152997/ssc:100518251/ssc:100511937/ssc:100152215/ssc:733621/ssc:100517317/ssc:100192445/ssc:100621789/ssc:397070	11	5	ENSSSCG00000003909/ENSSSCG00000004387/ENSSSCG00000030820/ENSSSCG00000037719/ENSSSCG00000022126	6	ENSSSCG00000022689/ENSSSCG00000011407/ENSSSCG00000035249/ENSSSCG00000026969/ENSSSCG00000001565/ENSSSCG00000030413
ssc05224	Breast cancer	19/628	110/5126	0.0744928893489495	0.629803519041119	ENSSSCG00000022689/ENSSSCG00000002383/ENSSSCG00000004755/ENSSSCG00000031356/ENSSSCG00000035249/ENSSSCG00000026969/ENSSSCG00000003909/ENSSSCG00000001565/ENSSSCG00000016140/ENSSSCG00000000272/ENSSSCG00000030413/ENSSSCG00000006709/ENSSSCG00000035859/ENSSSCG00000014920/ENSSSCG00000007458/ENSSSCG00000005965/ENSSSCG00000022126/ENSSSCG00000003140/ENSSSCG00000010638	GADD45B/FOS/DLL4/HES1/GADD45G/KRAS/-/CDKN1A/FZD5/SP1/PIK3CA/NOTCH2/WNT5A/FZD4/NCOA3/MYC/EGFR/FGF21/TCF7L2	ssc:100621090/ssc:100144486/ssc:100152163/ssc:100499567/ssc:100152997/ssc:100518251/ssc:100511937/ssc:100152215/ssc:100519058/ssc:396575/ssc:100621789/ssc:100153369/ssc:100627056/ssc:100520319/ssc:100135659/ssc:448810/ssc:397070/ssc:100302504/ssc:100153922	19	13	ENSSSCG00000002383/ENSSSCG00000031356/ENSSSCG00000003909/ENSSSCG00000016140/ENSSSCG00000000272/ENSSSCG00000006709/ENSSSCG00000035859/ENSSSCG00000014920/ENSSSCG00000007458/ENSSSCG00000005965/ENSSSCG00000022126/ENSSSCG00000003140/ENSSSCG00000010638	6	ENSSSCG00000022689/ENSSSCG00000004755/ENSSSCG00000035249/ENSSSCG00000026969/ENSSSCG00000001565/ENSSSCG00000030413
ssc04120	Ubiquitin mediated proteolysis	20/628	118/5126	0.0802174749752161	0.658255162296626	ENSSSCG00000027529/ENSSSCG00000010563/ENSSSCG00000029198/ENSSSCG00000012110/ENSSSCG00000025028/ENSSSCG00000017308/ENSSSCG00000015853/ENSSSCG00000016564/ENSSSCG00000008105/ENSSSCG00000029478/ENSSSCG00000024373/ENSSSCG00000033057/ENSSSCG00000015115/ENSSSCG00000012328/ENSSSCG00000038913/ENSSSCG00000023307/ENSSSCG00000008924/ENSSSCG00000038953/ENSSSCG00000004032/ENSSSCG00000028327	BIRC3/BTRC/CUL5/MID1/-/CDC27/HERC2/UBE2H/ANAPC1/CUL4B/TRIP12/ANAPC13/CBL/HUWE1/HERC4/FBXW11/UBA6/UBE2B/PRKN/RHOBTB1	ssc:100622590/ssc:100157842/ssc:100525708/ssc:100524415/ssc:100037300/ssc:100517185/ssc:100737018/ssc:100626356/ssc:100519830/ssc:100513454/ssc:100622166/ssc:100415776/ssc:100518854/ssc:100517442/ssc:102167519/ssc:100523218/ssc:100512547/ssc:100513527/ssc:733673/ssc:100153330	20	11	ENSSSCG00000010563/ENSSSCG00000012110/ENSSSCG00000015853/ENSSSCG00000016564/ENSSSCG00000008105/ENSSSCG00000024373/ENSSSCG00000015115/ENSSSCG00000012328/ENSSSCG00000023307/ENSSSCG00000004032/ENSSSCG00000028327	9	ENSSSCG00000027529/ENSSSCG00000029198/ENSSSCG00000025028/ENSSSCG00000017308/ENSSSCG00000029478/ENSSSCG00000033057/ENSSSCG00000038913/ENSSSCG00000008924/ENSSSCG00000038953
ssc05200	Pathways in cancer	56/628	386/5126	0.0944515768597722	0.719672747730114	ENSSSCG00000022689/ENSSSCG00000001952/ENSSSCG00000027529/ENSSSCG00000011407/ENSSSCG00000003112/ENSSSCG00000005096/ENSSSCG00000016916/ENSSSCG00000035355/ENSSSCG00000034012/ENSSSCG00000006646/ENSSSCG00000002383/ENSSSCG00000005382/ENSSSCG00000010949/ENSSSCG00000004755/ENSSSCG00000030957/ENSSSCG00000024351/ENSSSCG00000037964/ENSSSCG00000031356/ENSSSCG00000021068/ENSSSCG00000035249/ENSSSCG00000025028/…	GADD45B/NFKBIA/BIRC3/RASSF1/-/HIF1A/IL6ST/F2R/CASP3/ARNT/FOS/TGFBR1/DAPK1/DLL4/NFKB1/MET/GNG10/HES1/TRAF5/GADD45G/-/ROCK1/KRAS/-/CDKN1A/FZD5/MSH6/PLCB1/SP1/STK4/PIK3CA/CXCL8/NOTCH2/HDAC2/APPL1/WNT5A/FZD4/TPR/CBL/NCOA3/MYC/EGFR/ARHGEF11/LAMC1/FGF21/CREBBP/EP300/GNAI1/DCC/GNG11/BMP2/GNB4/TCF7L2/CCNE2/LPAR6/JAK2	ssc:100621090/ssc:406188/ssc:100622590/ssc:100516830/ssc:100517403/ssc:396696/ssc:100037294/ssc:100521609/ssc:397244/ssc:396653/ssc:100144486/ssc:396665/ssc:100516103/ssc:100152163/ssc:751869/ssc:654328/ssc:100515992/ssc:100499567/ssc:396616/ssc:100152997/ssc:100037300/ssc:397447/ssc:100518251/ssc:100511937/ssc:100152215/ssc:100519058/ssc:100624450/ssc:100152679/ssc:396575/ssc:100517317/ssc:10062…	56	26	ENSSSCG00000035355/ENSSSCG00000006646/ENSSSCG00000002383/ENSSSCG00000010949/ENSSSCG00000030957/ENSSSCG00000031356/ENSSSCG00000021068/ENSSSCG00000003909/ENSSSCG00000016140/ENSSSCG00000020931/ENSSSCG00000000272/ENSSSCG00000030820/ENSSSCG00000006709/ENSSSCG00000035859/ENSSSCG00000014920/ENSSSCG00000015115/ENSSSCG00000007458/ENSSSCG00000005965/ENSSSCG00000022126/ENSSSCG00000006461/ENSSSCG00000015555/…	30	ENSSSCG00000022689/ENSSSCG00000001952/ENSSSCG00000027529/ENSSSCG00000011407/ENSSSCG00000003112/ENSSSCG00000005096/ENSSSCG00000016916/ENSSSCG00000034012/ENSSSCG00000005382/ENSSSCG00000004755/ENSSSCG00000024351/ENSSSCG00000037964/ENSSSCG00000035249/ENSSSCG00000025028/ENSSSCG00000021893/ENSSSCG00000026969/ENSSSCG00000001565/ENSSSCG00000007056/ENSSSCG00000030413/ENSSSCG00000008953/ENSSSCG00000004432/…
ssc04064	NF-kappa B signaling pathway	13/628	72/5126	0.0957603883371595	0.719672747730114	ENSSSCG00000010312/ENSSSCG00000001952/ENSSSCG00000027529/ENSSSCG00000030957/ENSSSCG00000021068/ENSSSCG00000025028/ENSSSCG00000004154/ENSSSCG00000017330/ENSSSCG00000008953/ENSSSCG00000000755/ENSSSCG00000025606/ENSSSCG00000006175/ENSSSCG00000004898	PLAU/NFKBIA/BIRC3/NFKB1/TRAF5/-/TNFAIP3/MAP3K14/CXCL8/ERC1/ATM/LY96/TNFRSF11A	ssc:396985/ssc:406188/ssc:100622590/ssc:751869/ssc:396616/ssc:100037300/ssc:100622156/ssc:100520402/ssc:396880/ssc:100513988/ssc:100101922/ssc:100125555/ssc:100521706	13	4	ENSSSCG00000030957/ENSSSCG00000021068/ENSSSCG00000000755/ENSSSCG00000004898	9	ENSSSCG00000010312/ENSSSCG00000001952/ENSSSCG00000027529/ENSSSCG00000025028/ENSSSCG00000004154/ENSSSCG00000017330/ENSSSCG00000008953/ENSSSCG00000025606/ENSSSCG00000006175
ssc04260	Cardiac muscle contraction	10/628	52/5126	0.0965369812495095	0.719672747730114	ENSSSCG00000015402/ENSSSCG00000012298/ENSSSCG00000017307/ENSSSCG00000015084/ENSSSCG00000004480/ENSSSCG00000032129/ENSSSCG00000006070/ENSSSCG00000018078/ENSSSCG00000008195/ENSSSCG00000011441	CACNA2D1/CACNA1F/MYL4/FXYD2/COX7A2/COX7B/COX6C/COX2/COX5B/TNNC1	ssc:397377/ssc:100514745/ssc:100516998/ssc:541593/ssc:100038000/ssc:100516480/ssc:100037989/ssc:808504/ssc:492822/ssc:100156435	10	0		10	ENSSSCG00000015402/ENSSSCG00000012298/ENSSSCG00000017307/ENSSSCG00000015084/ENSSSCG00000004480/ENSSSCG00000032129/ENSSSCG00000006070/ENSSSCG00000018078/ENSSSCG00000008195/ENSSSCG00000011441
ssc03030	DNA replication	7/628	33/5126	0.100599416349371	0.719672747730114	ENSSSCG00000008788/ENSSSCG00000026055/ENSSSCG00000005008/ENSSSCG00000010240/ENSSSCG00000022240/ENSSSCG00000023886/ENSSSCG00000012979	RFC1/PRIM1/POLE2/DNA2/POLA1/-/RNASEH2C	ssc:100511271/ssc:100157576/ssc:100521651/ssc:100153906/ssc:102166485/ssc:100624116/ssc:100517142	7	1	ENSSSCG00000022240	6	ENSSSCG00000008788/ENSSSCG00000026055/ENSSSCG00000005008/ENSSSCG00000010240/ENSSSCG00000023886/ENSSSCG00000012979
ssc05216	Thyroid cancer	7/628	33/5126	0.100599416349371	0.719672747730114	ENSSSCG00000022689/ENSSSCG00000035249/ENSSSCG00000026969/ENSSSCG00000001565/ENSSSCG00000015576/ENSSSCG00000005965/ENSSSCG00000010638	GADD45B/GADD45G/KRAS/CDKN1A/TPR/MYC/TCF7L2	ssc:100621090/ssc:100152997/ssc:100518251/ssc:100152215/ssc:100520507/ssc:448810/ssc:100153922	7	2	ENSSSCG00000005965/ENSSSCG00000010638	5	ENSSSCG00000022689/ENSSSCG00000035249/ENSSSCG00000026969/ENSSSCG00000001565/ENSSSCG00000015576
ssc04932	Non-alcoholic fatty liver disease (NAFLD)	21/628	130/5126	0.110185746757014	0.747871456043663	ENSSSCG00000040751/ENSSSCG00000034012/ENSSSCG00000030957/ENSSSCG00000025729/ENSSSCG00000003909/ENSSSCG00000030413/ENSSSCG00000008953/ENSSSCG00000000006/ENSSSCG00000004480/ENSSSCG00000032129/ENSSSCG00000006070/ENSSSCG00000027307/ENSSSCG00000013936/ENSSSCG00000037869/ENSSSCG00000018078/ENSSSCG00000008195/ENSSSCG00000016100/ENSSSCG00000037455/ENSSSCG00000032390/ENSSSCG00000024144/ENSSSCG00000009794	DDIT3/CASP3/NFKB1/IRS1/-/PIK3CA/CXCL8/PPARA/COX7A2/COX7B/COX6C/NDUFA11/NDUFA13/-/COX2/COX5B/-/NDUFS8/NDUFB2/NDUFS7/MLXIP	ssc:100240743/ssc:397244/ssc:751869/ssc:100512686/ssc:100511937/ssc:100621789/ssc:396880/ssc:397239/ssc:100038000/ssc:100516480/ssc:100037989/ssc:100514033/ssc:100622110/ssc:100525371/ssc:808504/ssc:492822/ssc:100525083/ssc:100521945/ssc:100513895/ssc:100624738/ssc:100156510	21	5	ENSSSCG00000030957/ENSSSCG00000025729/ENSSSCG00000003909/ENSSSCG00000000006/ENSSSCG00000009794	16	ENSSSCG00000040751/ENSSSCG00000034012/ENSSSCG00000030413/ENSSSCG00000008953/ENSSSCG00000004480/ENSSSCG00000032129/ENSSSCG00000006070/ENSSSCG00000027307/ENSSSCG00000013936/ENSSSCG00000037869/ENSSSCG00000018078/ENSSSCG00000008195/ENSSSCG00000016100/ENSSSCG00000037455/ENSSSCG00000032390/ENSSSCG00000024144
ssc04350	TGF-beta signaling pathway	12/628	67/5126	0.111709208471709	0.747871456043663	ENSSSCG00000005382/ENSSSCG00000015874/ENSSSCG00000010360/ENSSSCG00000021893/ENSSSCG00000014121/ENSSSCG00000000272/ENSSSCG00000014319/ENSSSCG00000005965/ENSSSCG00000000233/ENSSSCG00000007951/ENSSSCG00000000068/ENSSSCG00000039442	TGFBR1/ACVR1/BMPR1A/ROCK1/ZFYVE16/SP1/SMAD5/MYC/ACVR1B/CREBBP/EP300/BMP2	ssc:396665/ssc:100152307/ssc:100169652/ssc:397447/ssc:100511806/ssc:396575/ssc:100624262/ssc:448810/ssc:100152462/ssc:100620215/ssc:100156226/ssc:100157103	12	6	ENSSSCG00000015874/ENSSSCG00000000272/ENSSSCG00000005965/ENSSSCG00000000233/ENSSSCG00000007951/ENSSSCG00000000068	6	ENSSSCG00000005382/ENSSSCG00000010360/ENSSSCG00000021893/ENSSSCG00000014121/ENSSSCG00000014319/ENSSSCG00000039442
ssc05215	Prostate cancer	14/628	81/5126	0.113755890590748	0.747871456043663	ENSSSCG00000010312/ENSSSCG00000001952/ENSSSCG00000030957/ENSSSCG00000026969/ENSSSCG00000003909/ENSSSCG00000001565/ENSSSCG00000037719/ENSSSCG00000030413/ENSSSCG00000016520/ENSSSCG00000022126/ENSSSCG00000007951/ENSSSCG00000000068/ENSSSCG00000010638/ENSSSCG00000006095	PLAU/NFKBIA/NFKB1/KRAS/-/CDKN1A/PDPK1/PIK3CA/CREB3L2/EGFR/CREBBP/EP300/TCF7L2/CCNE2	ssc:396985/ssc:406188/ssc:751869/ssc:100518251/ssc:100511937/ssc:100152215/ssc:100192445/ssc:100621789/ssc:100520468/ssc:397070/ssc:100620215/ssc:100156226/ssc:100153922/ssc:100512048	14	8	ENSSSCG00000030957/ENSSSCG00000003909/ENSSSCG00000037719/ENSSSCG00000016520/ENSSSCG00000022126/ENSSSCG00000007951/ENSSSCG00000000068/ENSSSCG00000010638	6	ENSSSCG00000010312/ENSSSCG00000001952/ENSSSCG00000026969/ENSSSCG00000001565/ENSSSCG00000030413/ENSSSCG00000006095
ssc05016	Huntington's disease	26/628	167/5126	0.115263342687733	0.747871456043663	ENSSSCG00000003112/ENSSSCG00000040185/ENSSSCG00000034012/ENSSSCG00000007056/ENSSSCG00000000272/ENSSSCG00000002526/ENSSSCG00000004432/ENSSSCG00000007700/ENSSSCG00000016520/ENSSSCG00000004480/ENSSSCG00000032129/ENSSSCG00000001880/ENSSSCG00000006070/ENSSSCG00000027307/ENSSSCG00000013936/ENSSSCG00000007688/ENSSSCG00000037869/ENSSSCG00000018078/ENSSSCG00000007951/ENSSSCG00000008195/ENSSSCG00000016100/…	-/TFAM/CASP3/PLCB1/SP1/RCOR1/HDAC2/HIP1/CREB3L2/COX7A2/COX7B/SIN3A/COX6C/NDUFA11/NDUFA13/-/-/COX2/CREBBP/COX5B/-/NDUFS8/EP300/NDUFB2/NDUFS7/DNAL1	ssc:100517403/ssc:397279/ssc:397244/ssc:100152679/ssc:396575/ssc:100155804/ssc:100156170/ssc:100523598/ssc:100520468/ssc:100038000/ssc:100516480/ssc:100621221/ssc:100037989/ssc:100514033/ssc:100622110/ssc:100521614/ssc:100525371/ssc:808504/ssc:100620215/ssc:492822/ssc:100525083/ssc:100521945/ssc:100156226/ssc:100513895/ssc:100624738/ssc:100156521	26	7	ENSSSCG00000000272/ENSSSCG00000002526/ENSSSCG00000007700/ENSSSCG00000016520/ENSSSCG00000001880/ENSSSCG00000007951/ENSSSCG00000000068	19	ENSSSCG00000003112/ENSSSCG00000040185/ENSSSCG00000034012/ENSSSCG00000007056/ENSSSCG00000004432/ENSSSCG00000004480/ENSSSCG00000032129/ENSSSCG00000006070/ENSSSCG00000027307/ENSSSCG00000013936/ENSSSCG00000007688/ENSSSCG00000037869/ENSSSCG00000018078/ENSSSCG00000008195/ENSSSCG00000016100/ENSSSCG00000037455/ENSSSCG00000032390/ENSSSCG00000024144/ENSSSCG00000039469
ssc04960	Aldosterone-regulated sodium reabsorption	6/628	28/5126	0.119154438590976	0.755547462883686	ENSSSCG00000025729/ENSSSCG00000026969/ENSSSCG00000003909/ENSSSCG00000037719/ENSSSCG00000030413/ENSSSCG00000015084	IRS1/KRAS/-/PDPK1/PIK3CA/FXYD2	ssc:100512686/ssc:100518251/ssc:100511937/ssc:100192445/ssc:100621789/ssc:541593	6	3	ENSSSCG00000025729/ENSSSCG00000003909/ENSSSCG00000037719	3	ENSSSCG00000026969/ENSSSCG00000030413/ENSSSCG00000015084
ssc00220	Arginine biosynthesis	4/628	16/5126	0.122810216328407	0.761423341236122	ENSSSCG00000016056/ENSSSCG00000007738/ENSSSCG00000023325/ENSSSCG00000005701	GLS/-/-/ASS1	ssc:399525/ssc:100517757/ssc:396930/ssc:414411	4	0		4	ENSSSCG00000016056/ENSSSCG00000007738/ENSSSCG00000023325/ENSSSCG00000005701
ssc05165	Human papillomavirus infection	36/628	245/5126	0.137466116240288	0.833761878935661	ENSSSCG00000014277/ENSSSCG00000027206/ENSSSCG00000015375/ENSSSCG00000015801/ENSSSCG00000034012/ENSSSCG00000030957/ENSSSCG00000031356/ENSSSCG00000033185/ENSSSCG00000035420/ENSSSCG00000026969/ENSSSCG00000003909/ENSSSCG00000001565/ENSSSCG00000016140/ENSSSCG00000031498/ENSSSCG00000002287/ENSSSCG00000011679/ENSSSCG00000040575/ENSSSCG00000030413/ENSSSCG00000006709/ENSSSCG00000004432/ENSSSCG00000035859/…	IRF1/PARD6B/ITGB8/TLR3/CASP3/NFKB1/HES1/PPP2R3A/HES4/KRAS/-/CDKN1A/FZD5/PPP2R3C/MPP5/ATR/ISG15/PIK3CA/NOTCH2/HDAC2/WNT5A/FZD4/CREB3L2/TNN/RBPJ/EIF2AK2/EGFR/UBR4/ATM/LAMC1/CREBBP/EP300/HDAC4/TCF7L2/CCNE2/HES7	ssc:396611/ssc:100151957/ssc:100037284/ssc:100037937/ssc:397244/ssc:751869/ssc:100499567/ssc:102160080/ssc:100739264/ssc:100518251/ssc:100511937/ssc:100152215/ssc:100519058/ssc:110261574/ssc:100152635/ssc:100516227/ssc:100145895/ssc:100621789/ssc:100153369/ssc:100156170/ssc:100627056/ssc:100520319/ssc:100520468/ssc:102163961/ssc:100518262/ssc:397588/ssc:397070/ssc:102161705/ssc:100101922/ssc:1005…	36	16	ENSSSCG00000030957/ENSSSCG00000031356/ENSSSCG00000003909/ENSSSCG00000016140/ENSSSCG00000006709/ENSSSCG00000035859/ENSSSCG00000014920/ENSSSCG00000016520/ENSSSCG00000015507/ENSSSCG00000022126/ENSSSCG00000003488/ENSSSCG00000015555/ENSSSCG00000007951/ENSSSCG00000000068/ENSSSCG00000024777/ENSSSCG00000010638	20	ENSSSCG00000014277/ENSSSCG00000027206/ENSSSCG00000015375/ENSSSCG00000015801/ENSSSCG00000034012/ENSSSCG00000033185/ENSSSCG00000035420/ENSSSCG00000026969/ENSSSCG00000001565/ENSSSCG00000031498/ENSSSCG00000002287/ENSSSCG00000011679/ENSSSCG00000040575/ENSSSCG00000030413/ENSSSCG00000004432/ENSSSCG00000022155/ENSSSCG00000008496/ENSSSCG00000025606/ENSSSCG00000006095/ENSSSCG00000017982
ssc04062	Chemokine signaling pathway	20/628	127/5126	0.140791247038298	0.835760806886916	ENSSSCG00000001952/ENSSSCG00000017705/ENSSSCG00000016254/ENSSSCG00000032595/ENSSSCG00000030957/ENSSSCG00000037964/ENSSSCG00000021893/ENSSSCG00000026969/ENSSSCG00000003909/ENSSSCG00000017466/ENSSSCG00000007056/ENSSSCG00000004387/ENSSSCG00000030413/ENSSSCG00000008953/ENSSSCG00000008959/ENSSSCG00000012034/ENSSSCG00000015407/ENSSSCG00000015324/ENSSSCG00000037583/ENSSSCG00000005215	NFKBIA/CCL5/CCL20/RAP1B/NFKB1/GNG10/ROCK1/KRAS/-/CCR7/PLCB1/FOXO3/PIK3CA/CXCL8/CXCL2/TIAM1/GNAI1/GNG11/GNB4/JAK2	ssc:406188/ssc:396613/ssc:553951/ssc:100152555/ssc:751869/ssc:100515992/ssc:397447/ssc:100518251/ssc:100511937/ssc:396663/ssc:100152679/ssc:733621/ssc:100621789/ssc:396880/ssc:414904/ssc:100524587/ssc:100144419/ssc:100522202/ssc:100524280/ssc:397201	20	4	ENSSSCG00000030957/ENSSSCG00000003909/ENSSSCG00000004387/ENSSSCG00000012034	16	ENSSSCG00000001952/ENSSSCG00000017705/ENSSSCG00000016254/ENSSSCG00000032595/ENSSSCG00000037964/ENSSSCG00000021893/ENSSSCG00000026969/ENSSSCG00000017466/ENSSSCG00000007056/ENSSSCG00000030413/ENSSSCG00000008953/ENSSSCG00000008959/ENSSSCG00000015407/ENSSSCG00000015324/ENSSSCG00000037583/ENSSSCG00000005215
ssc04330	Notch signaling pathway	8/628	43/5126	0.148453336248915	0.855374713815843	ENSSSCG00000027516/ENSSSCG00000004755/ENSSSCG00000031356/ENSSSCG00000006709/ENSSSCG00000004432/ENSSSCG00000022155/ENSSSCG00000007951/ENSSSCG00000000068	CIR1/DLL4/HES1/NOTCH2/HDAC2/RBPJ/CREBBP/EP300	ssc:100511415/ssc:100152163/ssc:100499567/ssc:100153369/ssc:100156170/ssc:100518262/ssc:100620215/ssc:100156226	8	4	ENSSSCG00000031356/ENSSSCG00000006709/ENSSSCG00000007951/ENSSSCG00000000068	4	ENSSSCG00000027516/ENSSSCG00000004755/ENSSSCG00000004432/ENSSSCG00000022155
ssc05218	Melanoma	9/628	50/5126	0.151364005882739	0.855374713815843	ENSSSCG00000022689/ENSSSCG00000024351/ENSSSCG00000035249/ENSSSCG00000026969/ENSSSCG00000003909/ENSSSCG00000001565/ENSSSCG00000030413/ENSSSCG00000022126/ENSSSCG00000003140	GADD45B/MET/GADD45G/KRAS/-/CDKN1A/PIK3CA/EGFR/FGF21	ssc:100621090/ssc:654328/ssc:100152997/ssc:100518251/ssc:100511937/ssc:100152215/ssc:100621789/ssc:397070/ssc:100302504	9	3	ENSSSCG00000003909/ENSSSCG00000022126/ENSSSCG00000003140	6	ENSSSCG00000022689/ENSSSCG00000024351/ENSSSCG00000035249/ENSSSCG00000026969/ENSSSCG00000001565/ENSSSCG00000030413
ssc05220	Chronic myeloid leukemia	12/628	71/5126	0.153292959465205	0.855374713815843	ENSSSCG00000022689/ENSSSCG00000001952/ENSSSCG00000005382/ENSSSCG00000030957/ENSSSCG00000035249/ENSSSCG00000026969/ENSSSCG00000003909/ENSSSCG00000001565/ENSSSCG00000030413/ENSSSCG00000004432/ENSSSCG00000015115/ENSSSCG00000005965	GADD45B/NFKBIA/TGFBR1/NFKB1/GADD45G/KRAS/-/CDKN1A/PIK3CA/HDAC2/CBL/MYC	ssc:100621090/ssc:406188/ssc:396665/ssc:751869/ssc:100152997/ssc:100518251/ssc:100511937/ssc:100152215/ssc:100621789/ssc:100156170/ssc:100518854/ssc:448810	12	4	ENSSSCG00000030957/ENSSSCG00000003909/ENSSSCG00000015115/ENSSSCG00000005965	8	ENSSSCG00000022689/ENSSSCG00000001952/ENSSSCG00000005382/ENSSSCG00000035249/ENSSSCG00000026969/ENSSSCG00000001565/ENSSSCG00000030413/ENSSSCG00000004432
ssc04390	Hippo signaling pathway	19/628	122/5126	0.159829290328983	0.872076327098181	ENSSSCG00000011407/ENSSSCG00000003112/ENSSSCG00000027206/ENSSSCG00000039221/ENSSSCG00000008540/ENSSSCG00000010563/ENSSSCG00000005382/ENSSSCG00000010360/ENSSSCG00000004192/ENSSSCG00000016140/ENSSSCG00000002287/ENSSSCG00000035859/ENSSSCG00000014920/ENSSSCG00000005965/ENSSSCG00000011313/ENSSSCG00000023307/ENSSSCG00000010894/ENSSSCG00000039442/ENSSSCG00000010638	RASSF1/-/PARD6B/MOB1A/PPP1CB/BTRC/TGFBR1/BMPR1A/CTGF/FZD5/MPP5/WNT5A/FZD4/MYC/LIMD1/FBXW11/TP53BP2/BMP2/TCF7L2	ssc:100516830/ssc:100517403/ssc:100151957/ssc:100738341/ssc:397378/ssc:100157842/ssc:396665/ssc:100169652/ssc:100152141/ssc:100519058/ssc:100152635/ssc:100627056/ssc:100520319/ssc:448810/ssc:100738579/ssc:100523218/ssc:100519863/ssc:100157103/ssc:100153922	19	10	ENSSSCG00000010563/ENSSSCG00000004192/ENSSSCG00000016140/ENSSSCG00000035859/ENSSSCG00000014920/ENSSSCG00000005965/ENSSSCG00000011313/ENSSSCG00000023307/ENSSSCG00000010894/ENSSSCG00000010638	9	ENSSSCG00000011407/ENSSSCG00000003112/ENSSSCG00000027206/ENSSSCG00000039221/ENSSSCG00000008540/ENSSSCG00000005382/ENSSSCG00000010360/ENSSSCG00000002287/ENSSSCG00000039442
ssc00240	Pyrimidine metabolism	14/628	87/5126	0.172656541296657	0.872076327098181	ENSSSCG00000031882/ENSSSCG00000006294/ENSSSCG00000008098/ENSSSCG00000026055/ENSSSCG00000005008/ENSSSCG00000010497/ENSSSCG00000025298/ENSSSCG00000022240/ENSSSCG00000030388/ENSSSCG00000026233/ENSSSCG00000007688/ENSSSCG00000034147/ENSSSCG00000028210/ENSSSCG00000036139	PNPT1/NME7/POLR1B/PRIM1/POLE2/-/TWISTNB/POLA1/UPP1/POLR3G/-/DTYMK/NT5C/RRM2B	ssc:100642182/ssc:100152763/ssc:100517151/ssc:100157576/ssc:100521651/ssc:397298/ssc:100517907/ssc:102166485/ssc:100625277/ssc:100519356/ssc:100521614/ssc:110257191/ssc:100526240/ssc:100157205	14	3	ENSSSCG00000008098/ENSSSCG00000010497/ENSSSCG00000022240	11	ENSSSCG00000031882/ENSSSCG00000006294/ENSSSCG00000026055/ENSSSCG00000005008/ENSSSCG00000025298/ENSSSCG00000030388/ENSSSCG00000026233/ENSSSCG00000007688/ENSSSCG00000034147/ENSSSCG00000028210/ENSSSCG00000036139
ssc04014	Ras signaling pathway	25/628	168/5126	0.173182289046217	0.872076327098181	ENSSSCG00000006530/ENSSSCG00000011407/ENSSSCG00000038948/ENSSSCG00000037653/ENSSSCG00000010628/ENSSSCG00000015563/ENSSSCG00000032595/ENSSSCG00000030957/ENSSSCG00000024351/ENSSSCG00000037964/ENSSSCG00000026969/ENSSSCG00000003909/ENSSSCG00000030820/ENSSSCG00000030413/ENSSSCG00000037449/ENSSSCG00000004018/ENSSSCG00000012034/ENSSSCG00000026914/ENSSSCG00000022126/ENSSSCG00000009855/ENSSSCG00000003140/…	EFNA1/RASSF1/ETS2/RAB5A/SHOC2/RGL1/RAP1B/NFKB1/MET/GNG10/KRAS/-/STK4/PIK3CA/CSF1/AFDN/TIAM1/PLA2G16/EGFR/KSR2/FGF21/RAB5B/KSR1/GNG11/GNB4	ssc:100144501/ssc:100516830/ssc:100154449/ssc:100144499/ssc:100155918/ssc:100515847/ssc:100152555/ssc:751869/ssc:654328/ssc:100515992/ssc:100518251/ssc:100511937/ssc:100517317/ssc:100621789/ssc:100513084/ssc:100514741/ssc:100524587/ssc:100512584/ssc:397070/ssc:100519054/ssc:100302504/ssc:100625381/ssc:100511282/ssc:100522202/ssc:100524280	25	11	ENSSSCG00000015563/ENSSSCG00000030957/ENSSSCG00000003909/ENSSSCG00000030820/ENSSSCG00000004018/ENSSSCG00000012034/ENSSSCG00000022126/ENSSSCG00000009855/ENSSSCG00000003140/ENSSSCG00000037597/ENSSSCG00000017753	14	ENSSSCG00000006530/ENSSSCG00000011407/ENSSSCG00000038948/ENSSSCG00000037653/ENSSSCG00000010628/ENSSSCG00000032595/ENSSSCG00000024351/ENSSSCG00000037964/ENSSSCG00000026969/ENSSSCG00000030413/ENSSSCG00000037449/ENSSSCG00000026914/ENSSSCG00000015324/ENSSSCG00000037583
ssc03440	Homologous recombination	7/628	38/5126	0.17629081541324	0.872076327098181	ENSSSCG00000024419/ENSSSCG00000006127/ENSSSCG00000016170/ENSSSCG00000021966/ENSSSCG00000000754/ENSSSCG00000023886/ENSSSCG00000025606	-/NBN/BARD1/TOPBP1/RAD52/-/ATM	ssc:100621518/ssc:100153233/ssc:100511662/ssc:100626645/ssc:100141308/ssc:100624116/ssc:100101922	7	2	ENSSSCG00000016170/ENSSSCG00000000754	5	ENSSSCG00000024419/ENSSSCG00000006127/ENSSSCG00000021966/ENSSSCG00000023886/ENSSSCG00000025606
ssc04962	Vasopressin-regulated water reabsorption	7/628	38/5126	0.17629081541324	0.872076327098181	ENSSSCG00000037653/ENSSSCG00000038383/ENSSSCG00000016520/ENSSSCG00000040513/ENSSSCG00000037597/ENSSSCG00000038895/ENSSSCG00000007163	RAB5A/DYNC2LI1/CREB3L2/AQP3/RAB5B/DCTN6/AVP	ssc:100144499/ssc:100513078/ssc:100520468/ssc:100126235/ssc:100625381/ssc:100312966/ssc:396995	7	2	ENSSSCG00000016520/ENSSSCG00000037597	5	ENSSSCG00000037653/ENSSSCG00000038383/ENSSSCG00000040513/ENSSSCG00000038895/ENSSSCG00000007163
ssc04137	Mitophagy - animal	10/628	59/5126	0.179255405012863	0.872076327098181	ENSSSCG00000005096/ENSSSCG00000016692/ENSSSCG00000039285/ENSSSCG00000000512/ENSSSCG00000026969/ENSSSCG00000004387/ENSSSCG00000000272/ENSSSCG00000004639/ENSSSCG00000000457/ENSSSCG00000004032	HIF1A/TAX1BP1/MFN1/TBC1D15/KRAS/FOXO3/SP1/USP8/USP15/PRKN	ssc:396696/ssc:100516165/ssc:100627612/ssc:100157246/ssc:100518251/ssc:733621/ssc:396575/ssc:100157546/ssc:100524085/ssc:733673	10	3	ENSSSCG00000004387/ENSSSCG00000000272/ENSSSCG00000004032	7	ENSSSCG00000005096/ENSSSCG00000016692/ENSSSCG00000039285/ENSSSCG00000000512/ENSSSCG00000026969/ENSSSCG00000004639/ENSSSCG00000000457
ssc05211	Renal cell carcinoma	10/628	59/5126	0.179255405012863	0.872076327098181	ENSSSCG00000005096/ENSSSCG00000006646/ENSSSCG00000032595/ENSSSCG00000024351/ENSSSCG00000026969/ENSSSCG00000003909/ENSSSCG00000001565/ENSSSCG00000030413/ENSSSCG00000007951/ENSSSCG00000000068	HIF1A/ARNT/RAP1B/MET/KRAS/-/CDKN1A/PIK3CA/CREBBP/EP300	ssc:396696/ssc:396653/ssc:100152555/ssc:654328/ssc:100518251/ssc:100511937/ssc:100152215/ssc:100621789/ssc:100620215/ssc:100156226	10	4	ENSSSCG00000006646/ENSSSCG00000003909/ENSSSCG00000007951/ENSSSCG00000000068	6	ENSSSCG00000005096/ENSSSCG00000032595/ENSSSCG00000024351/ENSSSCG00000026969/ENSSSCG00000001565/ENSSSCG00000030413
ssc00190	Oxidative phosphorylation	18/628	117/5126	0.181291852945142	0.872076327098181	ENSSSCG00000018069/ENSSSCG00000018084/ENSSSCG00000016577/ENSSSCG00000004480/ENSSSCG00000032129/ENSSSCG00000006070/ENSSSCG00000006138/ENSSSCG00000027307/ENSSSCG00000013936/ENSSSCG00000037869/ENSSSCG00000034019/ENSSSCG00000018078/ENSSSCG00000008195/ENSSSCG00000016100/ENSSSCG00000037455/ENSSSCG00000032390/ENSSSCG00000024144/ENSSSCG00000023903	ND2/ND3/ATP6V1F/COX7A2/COX7B/COX6C/ATP6V0D2/NDUFA11/NDUFA13/-/-/COX2/COX5B/-/NDUFS8/NDUFB2/NDUFS7/ATP5I	ssc:808502/ssc:808508/ssc:100518811/ssc:100038000/ssc:100516480/ssc:100037989/ssc:100521494/ssc:100514033/ssc:100622110/ssc:100525371/ssc:100037979/ssc:808504/ssc:492822/ssc:100525083/ssc:100521945/ssc:100513895/ssc:100624738/ssc:396950	18	0		18	ENSSSCG00000018069/ENSSSCG00000018084/ENSSSCG00000016577/ENSSSCG00000004480/ENSSSCG00000032129/ENSSSCG00000006070/ENSSSCG00000006138/ENSSSCG00000027307/ENSSSCG00000013936/ENSSSCG00000037869/ENSSSCG00000034019/ENSSSCG00000018078/ENSSSCG00000008195/ENSSSCG00000016100/ENSSSCG00000037455/ENSSSCG00000032390/ENSSSCG00000024144/ENSSSCG00000023903
ssc04931	Insulin resistance	15/628	96/5126	0.191735199042233	0.906680009030221	ENSSSCG00000001952/ENSSSCG00000008540/ENSSSCG00000030957/ENSSSCG00000039862/ENSSSCG00000025729/ENSSSCG00000003909/ENSSSCG00000012403/ENSSSCG00000037719/ENSSSCG00000030413/ENSSSCG00000022797/ENSSSCG00000000006/ENSSSCG00000016520/ENSSSCG00000009794/ENSSSCG00000013022/ENSSSCG00000007530	NFKBIA/PPP1CB/NFKB1/TRIB3/IRS1/-/-/PDPK1/PIK3CA/PPP1R3B/PPARA/CREB3L2/MLXIP/PYGM/PPP1R3D	ssc:406188/ssc:397378/ssc:751869/ssc:100518810/ssc:100512686/ssc:100511937/ssc:664652/ssc:100192445/ssc:100621789/ssc:100515931/ssc:397239/ssc:100520468/ssc:100156510/ssc:733659/ssc:100521997	15	10	ENSSSCG00000030957/ENSSSCG00000025729/ENSSSCG00000003909/ENSSSCG00000012403/ENSSSCG00000037719/ENSSSCG00000022797/ENSSSCG00000000006/ENSSSCG00000016520/ENSSSCG00000009794/ENSSSCG00000007530	5	ENSSSCG00000001952/ENSSSCG00000008540/ENSSSCG00000039862/ENSSSCG00000030413/ENSSSCG00000013022
ssc05012	Parkinson's disease	19/628	126/5126	0.196836128664986	0.915287998292186	ENSSSCG00000018069/ENSSSCG00000018084/ENSSSCG00000034012/ENSSSCG00000004480/ENSSSCG00000032129/ENSSSCG00000020671/ENSSSCG00000006070/ENSSSCG00000027307/ENSSSCG00000013936/ENSSSCG00000037869/ENSSSCG00000018078/ENSSSCG00000008195/ENSSSCG00000016100/ENSSSCG00000037455/ENSSSCG00000032390/ENSSSCG00000024144/ENSSSCG00000015407/ENSSSCG00000004032/ENSSSCG00000010054	ND2/ND3/CASP3/COX7A2/COX7B/SLC18A2/COX6C/NDUFA11/NDUFA13/-/COX2/COX5B/-/NDUFS8/NDUFB2/NDUFS7/GNAI1/PRKN/ADORA2A	ssc:808502/ssc:808508/ssc:397244/ssc:100038000/ssc:100516480/ssc:100154950/ssc:100037989/ssc:100514033/ssc:100622110/ssc:100525371/ssc:808504/ssc:492822/ssc:100525083/ssc:100521945/ssc:100513895/ssc:100624738/ssc:100144419/ssc:733673/ssc:503661	19	1	ENSSSCG00000004032	18	ENSSSCG00000018069/ENSSSCG00000018084/ENSSSCG00000034012/ENSSSCG00000004480/ENSSSCG00000032129/ENSSSCG00000020671/ENSSSCG00000006070/ENSSSCG00000027307/ENSSSCG00000013936/ENSSSCG00000037869/ENSSSCG00000018078/ENSSSCG00000008195/ENSSSCG00000016100/ENSSSCG00000037455/ENSSSCG00000032390/ENSSSCG00000024144/ENSSSCG00000015407/ENSSSCG00000010054
ssc04015	Rap1 signaling pathway	23/628	157/5126	0.206715040838364	0.94546715399842	ENSSSCG00000006530/ENSSSCG00000035355/ENSSSCG00000027206/ENSSSCG00000032595/ENSSSCG00000024351/ENSSSCG00000026969/ENSSSCG00000013174/ENSSSCG00000003909/ENSSSCG00000007056/ENSSSCG00000030413/ENSSSCG00000014267/ENSSSCG00000037449/ENSSSCG00000004018/ENSSSCG00000001975/ENSSSCG00000012034/ENSSSCG00000022126/ENSSSCG00000006767/ENSSSCG00000008495/ENSSSCG00000002332/ENSSSCG00000003140/ENSSSCG00000002950/…	EFNA1/F2R/PARD6B/RAP1B/MET/KRAS/CTNND1/-/PLCB1/PIK3CA/-/CSF1/AFDN/PRKD1/TIAM1/EGFR/MAGI3/PRKD3/SIPA1L1/FGF21/SIPA1L3/GNAI1/ADORA2A	ssc:100144501/ssc:100521609/ssc:100151957/ssc:100152555/ssc:654328/ssc:100518251/ssc:100519699/ssc:100511937/ssc:100152679/ssc:100621789/ssc:100521255/ssc:100513084/ssc:100514741/ssc:102165436/ssc:100524587/ssc:397070/ssc:100153223/ssc:100523181/ssc:100157762/ssc:100302504/ssc:100514291/ssc:100144419/ssc:503661	23	11	ENSSSCG00000035355/ENSSSCG00000013174/ENSSSCG00000003909/ENSSSCG00000004018/ENSSSCG00000001975/ENSSSCG00000012034/ENSSSCG00000022126/ENSSSCG00000006767/ENSSSCG00000002332/ENSSSCG00000003140/ENSSSCG00000002950	12	ENSSSCG00000006530/ENSSSCG00000027206/ENSSSCG00000032595/ENSSSCG00000024351/ENSSSCG00000026969/ENSSSCG00000007056/ENSSSCG00000030413/ENSSSCG00000014267/ENSSSCG00000037449/ENSSSCG00000008495/ENSSSCG00000015407/ENSSSCG00000010054
ssc04660	T cell receptor signaling pathway	13/628	83/5126	0.210914288476485	0.949114298144183	ENSSSCG00000001952/ENSSSCG00000002383/ENSSSCG00000030957/ENSSSCG00000026969/ENSSSCG00000003909/ENSSSCG00000037719/ENSSSCG00000030413/ENSSSCG00000017330/ENSSSCG00000015115/ENSSSCG00000020705/ENSSSCG00000029578/ENSSSCG00000037319/ENSSSCG00000007477	NFKBIA/FOS/NFKB1/KRAS/-/PDPK1/PIK3CA/MAP3K14/CBL/MAP3K8/NFATC3/PDCD1/NFATC2	ssc:406188/ssc:100144486/ssc:751869/ssc:100518251/ssc:100511937/ssc:100192445/ssc:100621789/ssc:100520402/ssc:100518854/ssc:100622217/ssc:100739450/ssc:100533201/ssc:100134969	13	7	ENSSSCG00000002383/ENSSSCG00000030957/ENSSSCG00000003909/ENSSSCG00000037719/ENSSSCG00000015115/ENSSSCG00000029578/ENSSSCG00000007477	6	ENSSSCG00000001952/ENSSSCG00000026969/ENSSSCG00000030413/ENSSSCG00000017330/ENSSSCG00000020705/ENSSSCG00000037319
ssc03018	RNA degradation	11/628	69/5126	0.218699892222284	0.954432010002367	ENSSSCG00000016911/ENSSSCG00000031882/ENSSSCG00000024916/ENSSSCG00000006983/ENSSSCG00000039331/ENSSSCG00000014165/ENSSSCG00000021354/ENSSSCG00000011601/ENSSSCG00000005925/ENSSSCG00000026064/ENSSSCG00000004941	SKIV2L2/PNPT1/DHX36/CNOT7/-/-/CNOT4/LSM3/EXOSC4/-/DIS3L	ssc:100518521/ssc:100642182/ssc:100626674/ssc:100154442/ssc:100515656/ssc:100522857/ssc:100622832/ssc:100514071/ssc:100511875/ssc:100624767/ssc:100515640	11	2	ENSSSCG00000021354/ENSSSCG00000004941	9	ENSSSCG00000016911/ENSSSCG00000031882/ENSSSCG00000024916/ENSSSCG00000006983/ENSSSCG00000039331/ENSSSCG00000014165/ENSSSCG00000011601/ENSSSCG00000005925/ENSSSCG00000026064
ssc04723	Retrograde endocannabinoid signaling	16/628	106/5126	0.22109910587055	0.954432010002367	ENSSSCG00000018069/ENSSSCG00000018084/ENSSSCG00000037964/ENSSSCG00000007056/ENSSSCG00000012298/ENSSSCG00000027307/ENSSSCG00000013936/ENSSSCG00000037869/ENSSSCG00000016100/ENSSSCG00000037455/ENSSSCG00000032390/ENSSSCG00000024144/ENSSSCG00000015407/ENSSSCG00000015324/ENSSSCG00000037583/ENSSSCG00000012755	ND2/ND3/GNG10/PLCB1/CACNA1F/NDUFA11/NDUFA13/-/-/NDUFS8/NDUFB2/NDUFS7/GNAI1/GNG11/GNB4/GABRQ	ssc:808502/ssc:808508/ssc:100515992/ssc:100152679/ssc:100514745/ssc:100514033/ssc:100622110/ssc:100525371/ssc:100525083/ssc:100521945/ssc:100513895/ssc:100624738/ssc:100144419/ssc:100522202/ssc:100524280/ssc:100153018	16	1	ENSSSCG00000012755	15	ENSSSCG00000018069/ENSSSCG00000018084/ENSSSCG00000037964/ENSSSCG00000007056/ENSSSCG00000012298/ENSSSCG00000027307/ENSSSCG00000013936/ENSSSCG00000037869/ENSSSCG00000016100/ENSSSCG00000037455/ENSSSCG00000032390/ENSSSCG00000024144/ENSSSCG00000015407/ENSSSCG00000015324/ENSSSCG00000037583
ssc00562	Inositol phosphate metabolism	10/628	62/5126	0.22235871200772	0.954432010002367	ENSSSCG00000009994/ENSSSCG00000003749/ENSSSCG00000012742/ENSSSCG00000007056/ENSSSCG00000017642/ENSSSCG00000030413/ENSSSCG00000025406/ENSSSCG00000033291/ENSSSCG00000008190/ENSSSCG00000040863	MTMR3/PIK3C3/MTM1/PLCB1/MTMR4/PIK3CA/PIK3C2A/PIP4K2B/INPP4A/IPMK	ssc:100157292/ssc:503700/ssc:100516892/ssc:100152679/ssc:100517493/ssc:100621789/ssc:100514626/ssc:100623031/ssc:100233232/ssc:100623323	10	5	ENSSSCG00000009994/ENSSSCG00000012742/ENSSSCG00000017642/ENSSSCG00000033291/ENSSSCG00000008190	5	ENSSSCG00000003749/ENSSSCG00000007056/ENSSSCG00000030413/ENSSSCG00000025406/ENSSSCG00000040863
ssc04340	Hedgehog signaling pathway	7/628	41/5126	0.230615237724762	0.96032315410759	ENSSSCG00000010563/ENSSSCG00000004558/ENSSSCG00000014283/ENSSSCG00000032198/ENSSSCG00000006302/ENSSSCG00000040746/ENSSSCG00000023307	BTRC/CSNK1G1/KIF3A/SPOPL/GPR161/LRP2/FBXW11	ssc:100157842/ssc:100157196/ssc:100525739/ssc:100156406/ssc:100155594/ssc:100519689/ssc:100523218	7	5	ENSSSCG00000010563/ENSSSCG00000004558/ENSSSCG00000006302/ENSSSCG00000040746/ENSSSCG00000023307	2	ENSSSCG00000014283/ENSSSCG00000032198
ssc05134	Legionellosis	7/628	41/5126	0.230615237724762	0.96032315410759	ENSSSCG00000001952/ENSSSCG00000004169/ENSSSCG00000034012/ENSSSCG00000030957/ENSSSCG00000016095/ENSSSCG00000008953/ENSSSCG00000008959	NFKBIA/HBS1L/CASP3/NFKB1/CLK1/CXCL8/CXCL2	ssc:406188/ssc:100158211/ssc:397244/ssc:751869/ssc:100141471/ssc:396880/ssc:414904	7	1	ENSSSCG00000030957	6	ENSSSCG00000001952/ENSSSCG00000004169/ENSSSCG00000034012/ENSSSCG00000016095/ENSSSCG00000008953/ENSSSCG00000008959
ssc04725	Cholinergic synapse	13/628	85/5126	0.236636654478038	0.963066012969352	ENSSSCG00000039947/ENSSSCG00000002383/ENSSSCG00000037964/ENSSSCG00000026969/ENSSSCG00000003909/ENSSSCG00000007056/ENSSSCG00000030413/ENSSSCG00000012298/ENSSSCG00000016520/ENSSSCG00000015407/ENSSSCG00000015324/ENSSSCG00000037583/ENSSSCG00000005215	KCNJ2/FOS/GNG10/KRAS/-/PLCB1/PIK3CA/CACNA1F/CREB3L2/GNAI1/GNG11/GNB4/JAK2	ssc:397293/ssc:100144486/ssc:100515992/ssc:100518251/ssc:100511937/ssc:100152679/ssc:100621789/ssc:100514745/ssc:100520468/ssc:100144419/ssc:100522202/ssc:100524280/ssc:397201	13	4	ENSSSCG00000039947/ENSSSCG00000002383/ENSSSCG00000003909/ENSSSCG00000016520	9	ENSSSCG00000037964/ENSSSCG00000026969/ENSSSCG00000007056/ENSSSCG00000030413/ENSSSCG00000012298/ENSSSCG00000015407/ENSSSCG00000015324/ENSSSCG00000037583/ENSSSCG00000005215
ssc04261	Adrenergic signaling in cardiomyocytes	15/628	100/5126	0.2381776161107	0.963066012969352	ENSSSCG00000015402/ENSSSCG00000008540/ENSSSCG00000033185/ENSSSCG00000011106/ENSSSCG00000031498/ENSSSCG00000007056/ENSSSCG00000023084/ENSSSCG00000012298/ENSSSCG00000017307/ENSSSCG00000015273/ENSSSCG00000015084/ENSSSCG00000016520/ENSSSCG00000011259/ENSSSCG00000011441/ENSSSCG00000015407	CACNA2D1/PPP1CB/PPP2R3A/CREM/PPP2R3C/PLCB1/ATP2B2/CACNA1F/MYL4/ATP2B4/FXYD2/CREB3L2/SCN5A/TNNC1/GNAI1	ssc:397377/ssc:397378/ssc:102160080/ssc:100512363/ssc:110261574/ssc:100152679/ssc:100625418/ssc:100514745/ssc:100516998/ssc:100623420/ssc:541593/ssc:100520468/ssc:100152567/ssc:100156435/ssc:100144419	15	4	ENSSSCG00000023084/ENSSSCG00000015273/ENSSSCG00000016520/ENSSSCG00000011259	11	ENSSSCG00000015402/ENSSSCG00000008540/ENSSSCG00000033185/ENSSSCG00000011106/ENSSSCG00000031498/ENSSSCG00000007056/ENSSSCG00000012298/ENSSSCG00000017307/ENSSSCG00000015084/ENSSSCG00000011441/ENSSSCG00000015407
ssc04310	Wnt signaling pathway	17/628	116/5126	0.249784567484828	0.994749436492308	ENSSSCG00000010563/ENSSSCG00000006746/ENSSSCG00000016140/ENSSSCG00000007056/ENSSSCG00000034491/ENSSSCG00000011760/ENSSSCG00000012967/ENSSSCG00000035859/ENSSSCG00000014920/ENSSSCG00000005965/ENSSSCG00000029578/ENSSSCG00000023307/ENSSSCG00000007951/ENSSSCG00000007477/novel.1134/ENSSSCG00000000068/ENSSSCG00000010638	BTRC/VANGL1/FZD5/PLCB1/PRICKLE1/TBL1XR1/FOSL1/WNT5A/FZD4/MYC/NFATC3/FBXW11/CREBBP/NFATC2/-/EP300/TCF7L2	ssc:100157842/ssc:100157791/ssc:100519058/ssc:100152679/ssc:100157209/ssc:100522831/ssc:100525205/ssc:100627056/ssc:100520319/ssc:448810/ssc:100739450/ssc:100523218/ssc:100620215/ssc:100134969/ssc:100521810/ssc:100156226/ssc:100153922	17	14	ENSSSCG00000010563/ENSSSCG00000006746/ENSSSCG00000016140/ENSSSCG00000034491/ENSSSCG00000035859/ENSSSCG00000014920/ENSSSCG00000005965/ENSSSCG00000029578/ENSSSCG00000023307/ENSSSCG00000007951/ENSSSCG00000007477/novel.1134/ENSSSCG00000000068/ENSSSCG00000010638	3	ENSSSCG00000007056/ENSSSCG00000011760/ENSSSCG00000012967
ssc04917	Prolactin signaling pathway	10/628	64/5126	0.253144121831376	0.994749436492308	ENSSSCG00000014277/ENSSSCG00000002383/ENSSSCG00000030957/ENSSSCG00000032332/ENSSSCG00000026969/ENSSSCG00000003909/ENSSSCG00000004387/ENSSSCG00000030413/ENSSSCG00000004898/ENSSSCG00000005215	IRF1/FOS/NFKB1/SOCS4/KRAS/-/FOXO3/PIK3CA/TNFRSF11A/JAK2	ssc:396611/ssc:100144486/ssc:751869/ssc:100302366/ssc:100518251/ssc:100511937/ssc:733621/ssc:100621789/ssc:100521706/ssc:397201	10	5	ENSSSCG00000002383/ENSSSCG00000030957/ENSSSCG00000003909/ENSSSCG00000004387/ENSSSCG00000004898	5	ENSSSCG00000014277/ENSSSCG00000032332/ENSSSCG00000026969/ENSSSCG00000030413/ENSSSCG00000005215
ssc05217	Basal cell carcinoma	8/628	50/5126	0.264274096138587	0.999904640347203	ENSSSCG00000022689/ENSSSCG00000035249/ENSSSCG00000001565/ENSSSCG00000016140/ENSSSCG00000035859/ENSSSCG00000014920/ENSSSCG00000039442/ENSSSCG00000010638	GADD45B/GADD45G/CDKN1A/FZD5/WNT5A/FZD4/BMP2/TCF7L2	ssc:100621090/ssc:100152997/ssc:100152215/ssc:100519058/ssc:100627056/ssc:100520319/ssc:100157103/ssc:100153922	8	4	ENSSSCG00000016140/ENSSSCG00000035859/ENSSSCG00000014920/ENSSSCG00000010638	4	ENSSSCG00000022689/ENSSSCG00000035249/ENSSSCG00000001565/ENSSSCG00000039442
ssc04070	Phosphatidylinositol signaling system	12/628	80/5126	0.270462488469592	0.999904640347203	ENSSSCG00000009994/ENSSSCG00000024999/ENSSSCG00000003749/ENSSSCG00000003909/ENSSSCG00000012742/ENSSSCG00000007056/ENSSSCG00000017642/ENSSSCG00000030413/ENSSSCG00000025406/ENSSSCG00000033291/ENSSSCG00000008190/ENSSSCG00000040863	MTMR3/PPIP5K2/PIK3C3/-/MTM1/PLCB1/MTMR4/PIK3CA/PIK3C2A/PIP4K2B/INPP4A/IPMK	ssc:100157292/ssc:100625306/ssc:503700/ssc:100511937/ssc:100516892/ssc:100152679/ssc:100517493/ssc:100621789/ssc:100514626/ssc:100623031/ssc:100233232/ssc:100623323	12	6	ENSSSCG00000009994/ENSSSCG00000003909/ENSSSCG00000012742/ENSSSCG00000017642/ENSSSCG00000033291/ENSSSCG00000008190	6	ENSSSCG00000024999/ENSSSCG00000003749/ENSSSCG00000007056/ENSSSCG00000030413/ENSSSCG00000025406/ENSSSCG00000040863
ssc05032	Morphine addiction	9/628	58/5126	0.275809403684969	0.999904640347203	ENSSSCG00000016929/ENSSSCG00000037964/ENSSSCG00000023924/ENSSSCG00000006218/ENSSSCG00000015407/ENSSSCG00000015324/ENSSSCG00000037583/ENSSSCG00000003805/ENSSSCG00000012755	PDE4D/GNG10/PDE1A/PDE7A/GNAI1/GNG11/GNB4/PDE4B/GABRQ	ssc:100037967/ssc:100515992/ssc:100152819/ssc:100127143/ssc:100144419/ssc:100522202/ssc:100524280/ssc:100037941/ssc:100153018	9	2	ENSSSCG00000006218/ENSSSCG00000012755	7	ENSSSCG00000016929/ENSSSCG00000037964/ENSSSCG00000023924/ENSSSCG00000015407/ENSSSCG00000015324/ENSSSCG00000037583/ENSSSCG00000003805
ssc05323	Rheumatoid arthritis	9/628	58/5126	0.275809403684969	0.999904640347203	ENSSSCG00000017705/ENSSSCG00000002383/ENSSSCG00000016254/ENSSSCG00000008953/ENSSSCG00000037449/ENSSSCG00000016577/ENSSSCG00000006138/ENSSSCG00000040725/ENSSSCG00000004898	CCL5/FOS/CCL20/CXCL8/CSF1/ATP6V1F/ATP6V0D2/IL11/TNFRSF11A	ssc:396613/ssc:100144486/ssc:553951/ssc:396880/ssc:100513084/ssc:100518811/ssc:100521494/ssc:110261056/ssc:100521706	9	2	ENSSSCG00000002383/ENSSSCG00000004898	7	ENSSSCG00000017705/ENSSSCG00000016254/ENSSSCG00000008953/ENSSSCG00000037449/ENSSSCG00000016577/ENSSSCG00000006138/ENSSSCG00000040725
ssc04620	Toll-like receptor signaling pathway	11/628	73/5126	0.277705242535754	0.999904640347203	ENSSSCG00000001952/ENSSSCG00000017705/ENSSSCG00000015801/ENSSSCG00000002383/ENSSSCG00000030957/ENSSSCG00000003909/ENSSSCG00000030413/ENSSSCG00000008953/ENSSSCG00000020705/ENSSSCG00000006175/ENSSSCG00000012853	NFKBIA/CCL5/TLR3/FOS/NFKB1/-/PIK3CA/CXCL8/MAP3K8/LY96/IRF7	ssc:406188/ssc:396613/ssc:100037937/ssc:100144486/ssc:751869/ssc:100511937/ssc:100621789/ssc:396880/ssc:100622217/ssc:100125555/ssc:100037289	11	4	ENSSSCG00000002383/ENSSSCG00000030957/ENSSSCG00000003909/ENSSSCG00000012853	7	ENSSSCG00000001952/ENSSSCG00000017705/ENSSSCG00000015801/ENSSSCG00000030413/ENSSSCG00000008953/ENSSSCG00000020705/ENSSSCG00000006175
ssc04130	SNARE interactions in vesicular transport	5/628	29/5126	0.278203325432047	0.999904640347203	ENSSSCG00000038735/ENSSSCG00000029615/ENSSSCG00000004190/ENSSSCG00000033135/ENSSSCG00000022820	SNAP23/VAMP7/STX7/VAMP5/VAMP8	ssc:100512755/ssc:100627083/ssc:100153196/ssc:100628224/ssc:100620246	5	0		5	ENSSSCG00000038735/ENSSSCG00000029615/ENSSSCG00000004190/ENSSSCG00000033135/ENSSSCG00000022820
ssc05168	Herpes simplex infection	19/628	134/5126	0.281617979926606	0.999904640347203	ENSSSCG00000001952/ENSSSCG00000017705/ENSSSCG00000015801/ENSSSCG00000008540/ENSSSCG00000034012/ENSSSCG00000002383/ENSSSCG00000030957/ENSSSCG00000021068/ENSSSCG00000017983/ENSSSCG00000008496/ENSSSCG00000006954/ENSSSCG00000022774/ENSSSCG00000007951/ENSSSCG00000000068/ENSSSCG00000010214/ENSSSCG00000011127/ENSSSCG00000012853/ENSSSCG00000012793/ENSSSCG00000005215	NFKBIA/CCL5/TLR3/PPP1CB/CASP3/FOS/NFKB1/TRAF5/PER1/EIF2AK2/EEF1D/NOP53/CREBBP/EP300/-/TAF3/IRF7/HCFC1/JAK2	ssc:406188/ssc:396613/ssc:100037937/ssc:397378/ssc:397244/ssc:100144486/ssc:751869/ssc:396616/ssc:100620648/ssc:397588/ssc:100737048/ssc:100624752/ssc:100620215/ssc:100156226/ssc:100155762/ssc:100620508/ssc:100037289/ssc:100523834/ssc:397201	19	8	ENSSSCG00000002383/ENSSSCG00000030957/ENSSSCG00000021068/ENSSSCG00000007951/ENSSSCG00000000068/ENSSSCG00000011127/ENSSSCG00000012853/ENSSSCG00000012793	11	ENSSSCG00000001952/ENSSSCG00000017705/ENSSSCG00000015801/ENSSSCG00000008540/ENSSSCG00000034012/ENSSSCG00000017983/ENSSSCG00000008496/ENSSSCG00000006954/ENSSSCG00000022774/ENSSSCG00000010214/ENSSSCG00000005215
ssc05146	Amoebiasis	10/628	66/5126	0.285272595619092	0.999904640347203	ENSSSCG00000037653/ENSSSCG00000034012/ENSSSCG00000030957/ENSSSCG00000003909/ENSSSCG00000007056/ENSSSCG00000030413/ENSSSCG00000008953/ENSSSCG00000015555/ENSSSCG00000037597/ENSSSCG00000010313	RAB5A/CASP3/NFKB1/-/PLCB1/PIK3CA/CXCL8/LAMC1/RAB5B/VCL	ssc:100144499/ssc:397244/ssc:751869/ssc:100511937/ssc:100152679/ssc:100621789/ssc:396880/ssc:100514785/ssc:100625381/ssc:396974	10	5	ENSSSCG00000030957/ENSSSCG00000003909/ENSSSCG00000015555/ENSSSCG00000037597/ENSSSCG00000010313	5	ENSSSCG00000037653/ENSSSCG00000034012/ENSSSCG00000007056/ENSSSCG00000030413/ENSSSCG00000008953
ssc04371	Apelin signaling pathway	15/628	104/5126	0.288640068719799	0.999904640347203	ENSSSCG00000040185/ENSSSCG00000005382/ENSSSCG00000037964/ENSSSCG00000004192/ENSSSCG00000003749/ENSSSCG00000026969/ENSSSCG00000007056/ENSSSCG00000029094/ENSSSCG00000014336/ENSSSCG00000017307/ENSSSCG00000011867/ENSSSCG00000015407/ENSSSCG00000024777/ENSSSCG00000015324/ENSSSCG00000037583	TFAM/TGFBR1/GNG10/CTGF/PIK3C3/KRAS/PLCB1/PIK3R4/EGR1/MYL4/MYLK/GNAI1/HDAC4/GNG11/GNB4	ssc:397279/ssc:396665/ssc:100515992/ssc:100152141/ssc:503700/ssc:100518251/ssc:100152679/ssc:100516293/ssc:100520726/ssc:100516998/ssc:396848/ssc:100144419/ssc:100624050/ssc:100522202/ssc:100524280	15	5	ENSSSCG00000004192/ENSSSCG00000029094/ENSSSCG00000014336/ENSSSCG00000011867/ENSSSCG00000024777	10	ENSSSCG00000040185/ENSSSCG00000005382/ENSSSCG00000037964/ENSSSCG00000003749/ENSSSCG00000026969/ENSSSCG00000007056/ENSSSCG00000017307/ENSSSCG00000015407/ENSSSCG00000015324/ENSSSCG00000037583
ssc04933	AGE-RAGE signaling pathway in diabetic complications	12/628	82/5126	0.29989814908377	0.999904640347203	ENSSSCG00000034012/ENSSSCG00000005382/ENSSSCG00000030957/ENSSSCG00000022447/ENSSSCG00000026969/ENSSSCG00000003909/ENSSSCG00000007056/ENSSSCG00000014336/ENSSSCG00000030413/ENSSSCG00000008953/ENSSSCG00000007115/ENSSSCG00000005215	CASP3/TGFBR1/NFKB1/F3/KRAS/-/PLCB1/EGR1/PIK3CA/CXCL8/THBD/JAK2	ssc:397244/ssc:396665/ssc:751869/ssc:396677/ssc:100518251/ssc:100511937/ssc:100152679/ssc:100520726/ssc:100621789/ssc:396880/ssc:100157642/ssc:397201	12	4	ENSSSCG00000030957/ENSSSCG00000003909/ENSSSCG00000014336/ENSSSCG00000007115	8	ENSSSCG00000034012/ENSSSCG00000005382/ENSSSCG00000022447/ENSSSCG00000026969/ENSSSCG00000007056/ENSSSCG00000030413/ENSSSCG00000008953/ENSSSCG00000005215
ssc04392	Hippo signaling pathway - multiple species	4/628	23/5126	0.308780187650742	0.999904640347203	ENSSSCG00000011407/ENSSSCG00000039221/ENSSSCG00000011313/ENSSSCG00000029189	RASSF1/MOB1A/LIMD1/DCHS1	ssc:100516830/ssc:100738341/ssc:100738579/ssc:100623166	4	2	ENSSSCG00000011313/ENSSSCG00000029189	2	ENSSSCG00000011407/ENSSSCG00000039221
ssc00270	Cysteine and methionine metabolism	6/628	38/5126	0.319216484718843	0.999904640347203	ENSSSCG00000022300/ENSSSCG00000001488/ENSSSCG00000004392/ENSSSCG00000016568/ENSSSCG00000010143/ENSSSCG00000014108	MAT2A/GCLC/-/AHCYL2/MTR/BHMT	ssc:100312974/ssc:100522018/ssc:100155925/ssc:100514931/ssc:397300/ssc:397371	6	4	ENSSSCG00000022300/ENSSSCG00000001488/ENSSSCG00000016568/ENSSSCG00000010143	2	ENSSSCG00000004392/ENSSSCG00000014108
ssc05230	Central carbon metabolism in cancer	8/628	53/5126	0.32051059702673	0.999904640347203	ENSSSCG00000005096/ENSSSCG00000024351/ENSSSCG00000026969/ENSSSCG00000016056/ENSSSCG00000003909/ENSSSCG00000030413/ENSSSCG00000005965/ENSSSCG00000022126	HIF1A/MET/KRAS/GLS/-/PIK3CA/MYC/EGFR	ssc:396696/ssc:654328/ssc:100518251/ssc:399525/ssc:100511937/ssc:100621789/ssc:448810/ssc:397070	8	3	ENSSSCG00000003909/ENSSSCG00000005965/ENSSSCG00000022126	5	ENSSSCG00000005096/ENSSSCG00000024351/ENSSSCG00000026969/ENSSSCG00000016056/ENSSSCG00000030413
ssc04916	Melanogenesis	11/628	76/5126	0.324808855899297	0.999904640347203	ENSSSCG00000026969/ENSSSCG00000016140/ENSSSCG00000007056/ENSSSCG00000035859/ENSSSCG00000014920/ENSSSCG00000016520/ENSSSCG00000007951/ENSSSCG00000000068/ENSSSCG00000015407/ENSSSCG00000010638/ENSSSCG00000007277	KRAS/FZD5/PLCB1/WNT5A/FZD4/CREB3L2/CREBBP/EP300/GNAI1/TCF7L2/ASIP	ssc:100518251/ssc:100519058/ssc:100152679/ssc:100627056/ssc:100520319/ssc:100520468/ssc:100620215/ssc:100156226/ssc:100144419/ssc:100153922/ssc:414439	11	7	ENSSSCG00000016140/ENSSSCG00000035859/ENSSSCG00000014920/ENSSSCG00000016520/ENSSSCG00000007951/ENSSSCG00000000068/ENSSSCG00000010638	4	ENSSSCG00000026969/ENSSSCG00000007056/ENSSSCG00000015407/ENSSSCG00000007277
ssc04662	B cell receptor signaling pathway	9/628	61/5126	0.328715610490266	0.999904640347203	ENSSSCG00000001952/ENSSSCG00000002383/ENSSSCG00000030957/ENSSSCG00000026969/ENSSSCG00000003909/ENSSSCG00000030413/ENSSSCG00000029578/ENSSSCG00000007477/ENSSSCG00000033684	NFKBIA/FOS/NFKB1/KRAS/-/PIK3CA/NFATC3/NFATC2/CD79A	ssc:406188/ssc:100144486/ssc:751869/ssc:100518251/ssc:100511937/ssc:100621789/ssc:100739450/ssc:100134969/ssc:100190992	9	5	ENSSSCG00000002383/ENSSSCG00000030957/ENSSSCG00000003909/ENSSSCG00000029578/ENSSSCG00000007477	4	ENSSSCG00000001952/ENSSSCG00000026969/ENSSSCG00000030413/ENSSSCG00000033684
ssc04213	Longevity regulating pathway - multiple species	8/628	54/5126	0.339759388447004	0.999904640347203	ENSSSCG00000025729/ENSSSCG00000026969/ENSSSCG00000003909/ENSSSCG00000004387/ENSSSCG00000030413/ENSSSCG00000034444/ENSSSCG00000004432/ENSSSCG00000010235	IRS1/KRAS/-/FOXO3/PIK3CA/EIF4EBP2/HDAC2/SIRT1	ssc:100512686/ssc:100518251/ssc:100511937/ssc:733621/ssc:100621789/ssc:100523927/ssc:100156170/ssc:751859	8	4	ENSSSCG00000025729/ENSSSCG00000003909/ENSSSCG00000004387/ENSSSCG00000034444	4	ENSSSCG00000026969/ENSSSCG00000030413/ENSSSCG00000004432/ENSSSCG00000010235
ssc04914	Progesterone-mediated oocyte maturation	11/628	77/5126	0.340895022996139	0.999904640347203	ENSSSCG00000036256/ENSSSCG00000012307/ENSSSCG00000038410/ENSSSCG00000026969/ENSSSCG00000017308/ENSSSCG00000003909/ENSSSCG00000008105/ENSSSCG00000030413/ENSSSCG00000033057/ENSSSCG00000010214/ENSSSCG00000015407	MAD2L1/CCNB3/CPEB2/KRAS/CDC27/-/ANAPC1/PIK3CA/ANAPC13/-/GNAI1	ssc:100523455/ssc:100515638/ssc:100462674/ssc:100518251/ssc:100517185/ssc:100511937/ssc:100519830/ssc:100621789/ssc:100415776/ssc:100155762/ssc:100144419	11	3	ENSSSCG00000012307/ENSSSCG00000003909/ENSSSCG00000008105	8	ENSSSCG00000036256/ENSSSCG00000038410/ENSSSCG00000026969/ENSSSCG00000017308/ENSSSCG00000030413/ENSSSCG00000033057/ENSSSCG00000010214/ENSSSCG00000015407
ssc03420	Nucleotide excision repair	6/628	39/5126	0.342026163075004	0.999904640347203	ENSSSCG00000008788/ENSSSCG00000005008/ENSSSCG00000029478/ENSSSCG00000023886/ENSSSCG00000024019/ENSSSCG00000007881	RFC1/POLE2/CUL4B/-/-/ERCC4	ssc:100511271/ssc:100521651/ssc:100513454/ssc:100624116/ssc:100739493/ssc:100516427	6	1	ENSSSCG00000007881	5	ENSSSCG00000008788/ENSSSCG00000005008/ENSSSCG00000029478/ENSSSCG00000023886/ENSSSCG00000024019
ssc05226	Gastric cancer	16/628	116/5126	0.345103595219226	0.999904640347203	ENSSSCG00000022689/ENSSSCG00000005382/ENSSSCG00000024351/ENSSSCG00000035249/ENSSSCG00000026969/ENSSSCG00000003909/ENSSSCG00000001565/ENSSSCG00000016140/ENSSSCG00000030413/ENSSSCG00000035859/ENSSSCG00000014920/ENSSSCG00000005965/ENSSSCG00000022126/ENSSSCG00000003140/ENSSSCG00000010638/ENSSSCG00000006095	GADD45B/TGFBR1/MET/GADD45G/KRAS/-/CDKN1A/FZD5/PIK3CA/WNT5A/FZD4/MYC/EGFR/FGF21/TCF7L2/CCNE2	ssc:100621090/ssc:396665/ssc:654328/ssc:100152997/ssc:100518251/ssc:100511937/ssc:100152215/ssc:100519058/ssc:100621789/ssc:100627056/ssc:100520319/ssc:448810/ssc:397070/ssc:100302504/ssc:100153922/ssc:100512048	16	8	ENSSSCG00000003909/ENSSSCG00000016140/ENSSSCG00000035859/ENSSSCG00000014920/ENSSSCG00000005965/ENSSSCG00000022126/ENSSSCG00000003140/ENSSSCG00000010638	8	ENSSSCG00000022689/ENSSSCG00000005382/ENSSSCG00000024351/ENSSSCG00000035249/ENSSSCG00000026969/ENSSSCG00000001565/ENSSSCG00000030413/ENSSSCG00000006095
ssc04922	Glucagon signaling pathway	11/628	78/5126	0.357122943784761	0.999904640347203	ENSSSCG00000008398/ENSSSCG00000017694/ENSSSCG00000035037/ENSSSCG00000007056/ENSSSCG00000000006/ENSSSCG00000032941/ENSSSCG00000016520/ENSSSCG00000010235/ENSSSCG00000007951/ENSSSCG00000000068/ENSSSCG00000013022	PPP4R3B/ACACA/-/PLCB1/PPARA/SIK2/CREB3L2/SIRT1/CREBBP/EP300/PYGM	ssc:100512224/ssc:397324/ssc:100621265/ssc:100152679/ssc:397239/ssc:100624404/ssc:100520468/ssc:751859/ssc:100620215/ssc:100156226/ssc:733659	11	6	ENSSSCG00000017694/ENSSSCG00000000006/ENSSSCG00000032941/ENSSSCG00000016520/ENSSSCG00000007951/ENSSSCG00000000068	5	ENSSSCG00000008398/ENSSSCG00000035037/ENSSSCG00000007056/ENSSSCG00000010235/ENSSSCG00000013022
ssc04114	Oocyte meiosis	13/628	94/5126	0.364338037264092	0.999904640347203	ENSSSCG00000010625/ENSSSCG00000036256/ENSSSCG00000008540/ENSSSCG00000010563/ENSSSCG00000038410/ENSSSCG00000010606/ENSSSCG00000017308/ENSSSCG00000008105/ENSSSCG00000033057/ENSSSCG00000012325/ENSSSCG00000023307/ENSSSCG00000010214/ENSSSCG00000006095	SMC3/MAD2L1/PPP1CB/BTRC/CPEB2/SLK/CDC27/ANAPC1/ANAPC13/SMC1A/FBXW11/-/CCNE2	ssc:100151864/ssc:100523455/ssc:397378/ssc:100157842/ssc:100462674/ssc:100156642/ssc:100517185/ssc:100519830/ssc:100415776/ssc:100523938/ssc:100523218/ssc:100155762/ssc:100512048	13	4	ENSSSCG00000010563/ENSSSCG00000008105/ENSSSCG00000012325/ENSSSCG00000023307	9	ENSSSCG00000010625/ENSSSCG00000036256/ENSSSCG00000008540/ENSSSCG00000038410/ENSSSCG00000010606/ENSSSCG00000017308/ENSSSCG00000033057/ENSSSCG00000010214/ENSSSCG00000006095
ssc05169	Epstein-Barr virus infection	22/628	166/5126	0.379875944878733	0.999904640347203	ENSSSCG00000001952/ENSSSCG00000030957/ENSSSCG00000021068/ENSSSCG00000039888/ENSSSCG00000003909/ENSSSCG00000001565/ENSSSCG00000004154/ENSSSCG00000028228/ENSSSCG00000030413/ENSSSCG00000017330/ENSSSCG00000005038/ENSSSCG00000004432/ENSSSCG00000010497/ENSSSCG00000005965/ENSSSCG00000022155/ENSSSCG00000008496/ENSSSCG00000026233/ENSSSCG00000007688/ENSSSCG00000007951/ENSSSCG00000000068/ENSSSCG00000010214/…	NFKBIA/NFKB1/TRAF5/STXBP5L/-/CDKN1A/TNFAIP3/XPO1/PIK3CA/MAP3K14/PSMC6/HDAC2/-/MYC/RBPJ/EIF2AK2/POLR3G/-/CREBBP/EP300/-/HDAC4	ssc:406188/ssc:751869/ssc:396616/ssc:100624061/ssc:100511937/ssc:100152215/ssc:100622156/ssc:397330/ssc:100621789/ssc:100520402/ssc:100154148/ssc:100156170/ssc:397298/ssc:448810/ssc:100518262/ssc:397588/ssc:100519356/ssc:100521614/ssc:100620215/ssc:100156226/ssc:100155762/ssc:100624050	22	9	ENSSSCG00000030957/ENSSSCG00000021068/ENSSSCG00000039888/ENSSSCG00000003909/ENSSSCG00000010497/ENSSSCG00000005965/ENSSSCG00000007951/ENSSSCG00000000068/ENSSSCG00000024777	13	ENSSSCG00000001952/ENSSSCG00000001565/ENSSSCG00000004154/ENSSSCG00000028228/ENSSSCG00000030413/ENSSSCG00000017330/ENSSSCG00000005038/ENSSSCG00000004432/ENSSSCG00000022155/ENSSSCG00000008496/ENSSSCG00000026233/ENSSSCG00000007688/ENSSSCG00000010214
ssc05205	Proteoglycans in cancer	22/628	166/5126	0.379875944878733	0.999904640347203	ENSSSCG00000010312/ENSSSCG00000032434/ENSSSCG00000005096/ENSSSCG00000008540/ENSSSCG00000034012/ENSSSCG00000024351/ENSSSCG00000021893/ENSSSCG00000026969/ENSSSCG00000003909/ENSSSCG00000001565/ENSSSCG00000016140/ENSSSCG00000037719/ENSSSCG00000030413/ENSSSCG00000035859/ENSSSCG00000014920/ENSSSCG00000009125/ENSSSCG00000015115/ENSSSCG00000005965/ENSSSCG00000012034/ENSSSCG00000010627/ENSSSCG00000022126/…	PLAU/PLAUR/HIF1A/PPP1CB/CASP3/MET/ROCK1/KRAS/-/CDKN1A/FZD5/PDPK1/PIK3CA/WNT5A/FZD4/ANK2/CBL/MYC/TIAM1/PDCD4/EGFR/-	ssc:396985/ssc:100521017/ssc:396696/ssc:397378/ssc:397244/ssc:654328/ssc:397447/ssc:100518251/ssc:100511937/ssc:100152215/ssc:100519058/ssc:100192445/ssc:100621789/ssc:100627056/ssc:100520319/ssc:100512728/ssc:100518854/ssc:448810/ssc:100524587/ssc:100157112/ssc:397070/ssc:397190	22	10	ENSSSCG00000003909/ENSSSCG00000016140/ENSSSCG00000037719/ENSSSCG00000035859/ENSSSCG00000014920/ENSSSCG00000009125/ENSSSCG00000015115/ENSSSCG00000005965/ENSSSCG00000012034/ENSSSCG00000022126	12	ENSSSCG00000010312/ENSSSCG00000032434/ENSSSCG00000005096/ENSSSCG00000008540/ENSSSCG00000034012/ENSSSCG00000024351/ENSSSCG00000021893/ENSSSCG00000026969/ENSSSCG00000001565/ENSSSCG00000030413/ENSSSCG00000010627/novel.1331
ssc00100	Steroid biosynthesis	3/628	18/5126	0.382093935106253	0.999904640347203	ENSSSCG00000028517/ENSSSCG00000008857/ENSSSCG00000007486	SC5D/MSMO1/CYP24A1	ssc:100520925/ssc:396590/ssc:397145	3	1	ENSSSCG00000007486	2	ENSSSCG00000028517/ENSSSCG00000008857
ssc04140	Autophagy - animal	16/628	119/5126	0.385128419969717	0.999904640347203	ENSSSCG00000005096/ENSSSCG00000011853/ENSSSCG00000031888/ENSSSCG00000009994/ENSSSCG00000010949/ENSSSCG00000025729/ENSSSCG00000003749/ENSSSCG00000026969/ENSSSCG00000003909/ENSSSCG00000017642/ENSSSCG00000029094/ENSSSCG00000037719/ENSSSCG00000030413/ENSSSCG00000003816/ENSSSCG00000022820/ENSSSCG00000002502	HIF1A/RUBCN/DDIT4/MTMR3/DAPK1/IRS1/PIK3C3/KRAS/-/MTMR4/PIK3R4/PDPK1/PIK3CA/ATG4C/VAMP8/ATG2B	ssc:396696/ssc:100153714/ssc:100153821/ssc:100157292/ssc:100516103/ssc:100512686/ssc:503700/ssc:100518251/ssc:100511937/ssc:100517493/ssc:100516293/ssc:100192445/ssc:100621789/ssc:100462748/ssc:100620246/ssc:100462716	16	9	ENSSSCG00000011853/ENSSSCG00000009994/ENSSSCG00000010949/ENSSSCG00000025729/ENSSSCG00000003909/ENSSSCG00000017642/ENSSSCG00000029094/ENSSSCG00000037719/ENSSSCG00000002502	7	ENSSSCG00000005096/ENSSSCG00000031888/ENSSSCG00000003749/ENSSSCG00000026969/ENSSSCG00000030413/ENSSSCG00000003816/ENSSSCG00000022820
ssc04060	Cytokine-cytokine receptor interaction	18/628	135/5126	0.387784282830437	0.999904640347203	ENSSSCG00000016916/ENSSSCG00000017705/ENSSSCG00000005382/ENSSSCG00000016254/ENSSSCG00000015874/ENSSSCG00000024351/ENSSSCG00000010360/ENSSSCG00000017466/ENSSSCG00000021206/ENSSSCG00000008953/ENSSSCG00000037449/ENSSSCG00000022126/ENSSSCG00000000233/ENSSSCG00000027130/ENSSSCG00000040725/ENSSSCG00000037914/ENSSSCG00000039442/ENSSSCG00000004898	IL6ST/CCL5/TGFBR1/CCL20/ACVR1/MET/BMPR1A/CCR7/IL1RAP/CXCL8/CSF1/EGFR/ACVR1B/TNFRSF12A/IL11/IL17RB/BMP2/TNFRSF11A	ssc:100037294/ssc:396613/ssc:396665/ssc:553951/ssc:100152307/ssc:654328/ssc:100169652/ssc:396663/ssc:100628318/ssc:396880/ssc:100513084/ssc:397070/ssc:100152462/ssc:100217390/ssc:110261056/ssc:100156014/ssc:100157103/ssc:100521706	18	5	ENSSSCG00000015874/ENSSSCG00000022126/ENSSSCG00000000233/ENSSSCG00000037914/ENSSSCG00000004898	13	ENSSSCG00000016916/ENSSSCG00000017705/ENSSSCG00000005382/ENSSSCG00000016254/ENSSSCG00000024351/ENSSSCG00000010360/ENSSSCG00000017466/ENSSSCG00000021206/ENSSSCG00000008953/ENSSSCG00000037449/ENSSSCG00000027130/ENSSSCG00000040725/ENSSSCG00000039442
ssc04380	Osteoclast differentiation	13/628	96/5126	0.394321813599557	0.999904640347203	ENSSSCG00000001952/ENSSSCG00000002383/ENSSSCG00000005382/ENSSSCG00000030957/ENSSSCG00000031616/ENSSSCG00000003909/ENSSSCG00000030413/ENSSSCG00000017330/ENSSSCG00000012967/ENSSSCG00000031493/ENSSSCG00000037449/ENSSSCG00000007477/ENSSSCG00000004898	NFKBIA/FOS/TGFBR1/NFKB1/FOSB/-/PIK3CA/MAP3K14/FOSL1/CYBA/CSF1/NFATC2/TNFRSF11A	ssc:406188/ssc:100144486/ssc:396665/ssc:751869/ssc:110261009/ssc:100511937/ssc:100621789/ssc:100520402/ssc:100525205/ssc:397507/ssc:100513084/ssc:100134969/ssc:100521706	13	5	ENSSSCG00000002383/ENSSSCG00000030957/ENSSSCG00000003909/ENSSSCG00000007477/ENSSSCG00000004898	8	ENSSSCG00000001952/ENSSSCG00000005382/ENSSSCG00000031616/ENSSSCG00000030413/ENSSSCG00000017330/ENSSSCG00000012967/ENSSSCG00000031493/ENSSSCG00000037449
ssc03020	RNA polymerase	4/628	26/5126	0.396738945168423	0.999904640347203	ENSSSCG00000008098/ENSSSCG00000025298/ENSSSCG00000026233/ENSSSCG00000007688	POLR1B/TWISTNB/POLR3G/-	ssc:100517151/ssc:100517907/ssc:100519356/ssc:100521614	4	1	ENSSSCG00000008098	3	ENSSSCG00000025298/ENSSSCG00000026233/ENSSSCG00000007688
ssc00061	Fatty acid biosynthesis	2/628	11/5126	0.397860121984629	0.999904640347203	ENSSSCG00000017694/ENSSSCG00000012583	ACACA/ACSL4	ssc:397324/ssc:448980	2	1	ENSSSCG00000017694	1	ENSSSCG00000012583
ssc00120	Primary bile acid biosynthesis	2/628	11/5126	0.397860121984629	0.999904640347203	ENSSSCG00000007426/ENSSSCG00000016519	ACOT8/AKR1D1	ssc:100157173/ssc:100520813	2	1	ENSSSCG00000016519	1	ENSSSCG00000007426
ssc03450	Non-homologous end-joining	2/628	11/5126	0.397860121984629	0.999904640347203	ENSSSCG00000006274/ENSSSCG00000014136	PRKDC/VCAN	ssc:100156379/ssc:100514895	2	1	ENSSSCG00000006274	1	ENSSSCG00000014136
ssc04972	Pancreatic secretion	8/628	57/5126	0.398279397773736	0.999904640347203	ENSSSCG00000032595/ENSSSCG00000007056/ENSSSCG00000014255/ENSSSCG00000023084/ENSSSCG00000015273/ENSSSCG00000015084/ENSSSCG00000003459/ENSSSCG00000011681	RAP1B/PLCB1/SLC12A2/ATP2B2/ATP2B4/FXYD2/CELA2A/TRPC1	ssc:100152555/ssc:100152679/ssc:100516960/ssc:100625418/ssc:100623420/ssc:541593/ssc:397197/ssc:100156938	8	2	ENSSSCG00000023084/ENSSSCG00000015273	6	ENSSSCG00000032595/ENSSSCG00000007056/ENSSSCG00000014255/ENSSSCG00000015084/ENSSSCG00000003459/ENSSSCG00000011681
ssc04151	PI3K-Akt signaling pathway	32/628	248/5126	0.403962358755174	0.999904640347203	ENSSSCG00000006530/ENSSSCG00000035355/ENSSSCG00000038185/ENSSSCG00000015375/ENSSSCG00000031888/ENSSSCG00000006206/ENSSSCG00000030957/ENSSSCG00000024351/ENSSSCG00000037964/ENSSSCG00000033185/ENSSSCG00000025729/ENSSSCG00000026969/ENSSSCG00000003909/ENSSSCG00000001565/ENSSSCG00000031498/ENSSSCG00000004387/ENSSSCG00000037719/ENSSSCG00000030413/ENSSSCG00000037449/ENSSSCG00000028420/ENSSSCG00000016520/…	EFNA1/F2R/EREG/ITGB8/DDIT4/-/NFKB1/MET/GNG10/PPP2R3A/IRS1/KRAS/-/CDKN1A/PPP2R3C/FOXO3/PDPK1/PIK3CA/CSF1/EIF4E/CREB3L2/TNN/MYC/EGFR/LAMC1/FGF21/GNG11/PHLPP1/GNB4/CCNE2/LPAR6/JAK2	ssc:100144501/ssc:100521609/ssc:100620969/ssc:100037284/ssc:100153821/ssc:100521447/ssc:751869/ssc:654328/ssc:100515992/ssc:102160080/ssc:100512686/ssc:100518251/ssc:100511937/ssc:100152215/ssc:110261574/ssc:733621/ssc:100192445/ssc:100621789/ssc:100513084/ssc:100038030/ssc:100520468/ssc:102163961/ssc:448810/ssc:397070/ssc:100514785/ssc:100302504/ssc:100522202/ssc:100154633/ssc:100524280/ssc:1005…	32	13	ENSSSCG00000035355/ENSSSCG00000030957/ENSSSCG00000025729/ENSSSCG00000003909/ENSSSCG00000004387/ENSSSCG00000037719/ENSSSCG00000016520/ENSSSCG00000015507/ENSSSCG00000005965/ENSSSCG00000022126/ENSSSCG00000015555/ENSSSCG00000003140/ENSSSCG00000004896	19	ENSSSCG00000006530/ENSSSCG00000038185/ENSSSCG00000015375/ENSSSCG00000031888/ENSSSCG00000006206/ENSSSCG00000024351/ENSSSCG00000037964/ENSSSCG00000033185/ENSSSCG00000026969/ENSSSCG00000001565/ENSSSCG00000031498/ENSSSCG00000030413/ENSSSCG00000037449/ENSSSCG00000028420/ENSSSCG00000015324/ENSSSCG00000037583/ENSSSCG00000006095/ENSSSCG00000036063/ENSSSCG00000005215
ssc00230	Purine metabolism	19/628	145/5126	0.413566061406415	0.999904640347203	ENSSSCG00000031882/ENSSSCG00000006294/ENSSSCG00000016929/ENSSSCG00000008098/ENSSSCG00000023924/ENSSSCG00000006218/ENSSSCG00000026055/ENSSSCG00000040337/ENSSSCG00000005008/ENSSSCG00000010497/ENSSSCG00000025298/ENSSSCG00000022240/ENSSSCG00000026233/ENSSSCG00000002650/ENSSSCG00000007688/ENSSSCG00000028210/ENSSSCG00000003805/ENSSSCG00000036139/ENSSSCG00000037053	PNPT1/NME7/PDE4D/POLR1B/PDE1A/PDE7A/PRIM1/-/POLE2/-/TWISTNB/POLA1/POLR3G/APRT/-/NT5C/PDE4B/RRM2B/AK6	ssc:100642182/ssc:100152763/ssc:100037967/ssc:100517151/ssc:100152819/ssc:100127143/ssc:100157576/ssc:733667/ssc:100521651/ssc:397298/ssc:100517907/ssc:102166485/ssc:100519356/ssc:100622001/ssc:100521614/ssc:100526240/ssc:100037941/ssc:100157205/ssc:106504175	19	5	ENSSSCG00000008098/ENSSSCG00000006218/ENSSSCG00000040337/ENSSSCG00000010497/ENSSSCG00000022240	14	ENSSSCG00000031882/ENSSSCG00000006294/ENSSSCG00000016929/ENSSSCG00000023924/ENSSSCG00000026055/ENSSSCG00000005008/ENSSSCG00000025298/ENSSSCG00000026233/ENSSSCG00000002650/ENSSSCG00000007688/ENSSSCG00000028210/ENSSSCG00000003805/ENSSSCG00000036139/ENSSSCG00000037053
ssc03430	Mismatch repair	3/628	19/5126	0.416920954158478	0.999904640347203	ENSSSCG00000008788/ENSSSCG00000020931/ENSSSCG00000023886	RFC1/MSH6/-	ssc:100511271/ssc:100624450/ssc:100624116	3	1	ENSSSCG00000020931	2	ENSSSCG00000008788/ENSSSCG00000023886
ssc04926	Relaxin signaling pathway	14/628	106/5126	0.425024990463744	0.999904640347203	ENSSSCG00000001952/ENSSSCG00000002383/ENSSSCG00000005382/ENSSSCG00000030957/ENSSSCG00000037964/ENSSSCG00000026969/ENSSSCG00000003909/ENSSSCG00000007056/ENSSSCG00000030413/ENSSSCG00000016520/ENSSSCG00000022126/ENSSSCG00000015407/ENSSSCG00000015324/ENSSSCG00000037583	NFKBIA/FOS/TGFBR1/NFKB1/GNG10/KRAS/-/PLCB1/PIK3CA/CREB3L2/EGFR/GNAI1/GNG11/GNB4	ssc:406188/ssc:100144486/ssc:396665/ssc:751869/ssc:100515992/ssc:100518251/ssc:100511937/ssc:100152679/ssc:100621789/ssc:100520468/ssc:397070/ssc:100144419/ssc:100522202/ssc:100524280	14	5	ENSSSCG00000002383/ENSSSCG00000030957/ENSSSCG00000003909/ENSSSCG00000016520/ENSSSCG00000022126	9	ENSSSCG00000001952/ENSSSCG00000005382/ENSSSCG00000037964/ENSSSCG00000026969/ENSSSCG00000007056/ENSSSCG00000030413/ENSSSCG00000015407/ENSSSCG00000015324/ENSSSCG00000037583
ssc04910	Insulin signaling pathway	16/628	122/5126	0.425681925612472	0.999904640347203	ENSSSCG00000008540/ENSSSCG00000032332/ENSSSCG00000025729/ENSSSCG00000017694/ENSSSCG00000026969/ENSSSCG00000003909/ENSSSCG00000037719/ENSSSCG00000030413/ENSSSCG00000022797/ENSSSCG00000028420/ENSSSCG00000011363/ENSSSCG00000015115/ENSSSCG00000010494/ENSSSCG00000031261/ENSSSCG00000013022/ENSSSCG00000007530	PPP1CB/SOCS4/IRS1/ACACA/KRAS/-/PDPK1/PIK3CA/PPP1R3B/EIF4E/PRKAR2A/CBL/SORBS1/RHOQ/PYGM/PPP1R3D	ssc:397378/ssc:100302366/ssc:100512686/ssc:397324/ssc:100518251/ssc:100511937/ssc:100192445/ssc:100621789/ssc:100515931/ssc:100038030/ssc:397493/ssc:100518854/ssc:100153151/ssc:100523840/ssc:733659/ssc:100521997	16	9	ENSSSCG00000025729/ENSSSCG00000017694/ENSSSCG00000003909/ENSSSCG00000037719/ENSSSCG00000022797/ENSSSCG00000011363/ENSSSCG00000015115/ENSSSCG00000010494/ENSSSCG00000007530	7	ENSSSCG00000008540/ENSSSCG00000032332/ENSSSCG00000026969/ENSSSCG00000030413/ENSSSCG00000028420/ENSSSCG00000031261/ENSSSCG00000013022
ssc05212	Pancreatic cancer	9/628	67/5126	0.438357179192476	0.999904640347203	ENSSSCG00000022689/ENSSSCG00000005382/ENSSSCG00000030957/ENSSSCG00000035249/ENSSSCG00000026969/ENSSSCG00000003909/ENSSSCG00000001565/ENSSSCG00000030413/ENSSSCG00000022126	GADD45B/TGFBR1/NFKB1/GADD45G/KRAS/-/CDKN1A/PIK3CA/EGFR	ssc:100621090/ssc:396665/ssc:751869/ssc:100152997/ssc:100518251/ssc:100511937/ssc:100152215/ssc:100621789/ssc:397070	9	3	ENSSSCG00000030957/ENSSSCG00000003909/ENSSSCG00000022126	6	ENSSSCG00000022689/ENSSSCG00000005382/ENSSSCG00000035249/ENSSSCG00000026969/ENSSSCG00000001565/ENSSSCG00000030413
ssc04066	HIF-1 signaling pathway	11/628	83/5126	0.43933301013725	0.999904640347203	ENSSSCG00000005096/ENSSSCG00000006646/ENSSSCG00000030957/ENSSSCG00000011848/ENSSSCG00000003909/ENSSSCG00000001565/ENSSSCG00000030413/ENSSSCG00000028420/ENSSSCG00000022126/ENSSSCG00000007951/ENSSSCG00000000068	HIF1A/ARNT/NFKB1/TFRC/-/CDKN1A/PIK3CA/EIF4E/EGFR/CREBBP/EP300	ssc:396696/ssc:396653/ssc:751869/ssc:397062/ssc:100511937/ssc:100152215/ssc:100621789/ssc:100038030/ssc:397070/ssc:100620215/ssc:100156226	11	6	ENSSSCG00000006646/ENSSSCG00000030957/ENSSSCG00000003909/ENSSSCG00000022126/ENSSSCG00000007951/ENSSSCG00000000068	5	ENSSSCG00000005096/ENSSSCG00000011848/ENSSSCG00000001565/ENSSSCG00000030413/ENSSSCG00000028420
ssc00514	Other types of O-glycan biosynthesis	3/628	20/5126	0.451081671149567	0.999904640347203	ENSSSCG00000012403/ENSSSCG00000031701/ENSSSCG00000030217	-/GXYLT1/COLGALT2	ssc:664652/ssc:110260763/ssc:100624924	3	2	ENSSSCG00000012403/ENSSSCG00000030217	1	ENSSSCG00000031701
ssc05010	Alzheimer's disease	18/628	140/5126	0.451474762723876	0.999904640347203	ENSSSCG00000004595/ENSSSCG00000034012/ENSSSCG00000035639/ENSSSCG00000007056/ENSSSCG00000012298/ENSSSCG00000004480/ENSSSCG00000032129/ENSSSCG00000006070/ENSSSCG00000027307/ENSSSCG00000013936/ENSSSCG00000037869/ENSSSCG00000018078/ENSSSCG00000008195/ENSSSCG00000016100/ENSSSCG00000037455/ENSSSCG00000032390/ENSSSCG00000024144/ENSSSCG00000003088	ADAM10/CASP3/NAE1/PLCB1/CACNA1F/COX7A2/COX7B/COX6C/NDUFA11/NDUFA13/-/COX2/COX5B/-/NDUFS8/NDUFB2/NDUFS7/APOE	ssc:397345/ssc:397244/ssc:100623778/ssc:100152679/ssc:100514745/ssc:100038000/ssc:100516480/ssc:100037989/ssc:100514033/ssc:100622110/ssc:100525371/ssc:808504/ssc:492822/ssc:100525083/ssc:100521945/ssc:100513895/ssc:100624738/ssc:397576	18	0		18	ENSSSCG00000004595/ENSSSCG00000034012/ENSSSCG00000035639/ENSSSCG00000007056/ENSSSCG00000012298/ENSSSCG00000004480/ENSSSCG00000032129/ENSSSCG00000006070/ENSSSCG00000027307/ENSSSCG00000013936/ENSSSCG00000037869/ENSSSCG00000018078/ENSSSCG00000008195/ENSSSCG00000016100/ENSSSCG00000037455/ENSSSCG00000032390/ENSSSCG00000024144/ENSSSCG00000003088
ssc04010	MAPK signaling pathway	29/628	229/5126	0.45417061401972	0.999904640347203	ENSSSCG00000006530/ENSSSCG00000022689/ENSSSCG00000037910/ENSSSCG00000015402/ENSSSCG00000038185/ENSSSCG00000040751/ENSSSCG00000034012/ENSSSCG00000002383/ENSSSCG00000005382/ENSSSCG00000032595/ENSSSCG00000030957/ENSSSCG00000024351/ENSSSCG00000035249/ENSSSCG00000032097/ENSSSCG00000040815/ENSSSCG00000026969/ENSSSCG00000021206/ENSSSCG00000035971/ENSSSCG00000030820/ENSSSCG00000017330/ENSSSCG00000004037/…	EFNA1/GADD45B/DUSP6/CACNA2D1/EREG/DDIT3/CASP3/FOS/TGFBR1/RAP1B/NFKB1/MET/GADD45G/DUSP16/DUSP5/KRAS/IL1RAP/DUSP2/STK4/MAP3K14/MAP3K4/CACNA1F/CSF1/MAP3K8/MYC/NFATC3/EGFR/FGF21/ELK4	ssc:100144501/ssc:100621090/ssc:100622968/ssc:397377/ssc:100620969/ssc:100240743/ssc:397244/ssc:100144486/ssc:396665/ssc:100152555/ssc:751869/ssc:654328/ssc:100152997/ssc:100620494/ssc:100157144/ssc:100518251/ssc:100628318/ssc:100622812/ssc:100517317/ssc:100520402/ssc:100154202/ssc:100514745/ssc:100513084/ssc:100622217/ssc:448810/ssc:100739450/ssc:397070/ssc:100302504/ssc:100626141	29	10	ENSSSCG00000037910/ENSSSCG00000002383/ENSSSCG00000030957/ENSSSCG00000032097/ENSSSCG00000030820/ENSSSCG00000004037/ENSSSCG00000005965/ENSSSCG00000029578/ENSSSCG00000022126/ENSSSCG00000003140	19	ENSSSCG00000006530/ENSSSCG00000022689/ENSSSCG00000015402/ENSSSCG00000038185/ENSSSCG00000040751/ENSSSCG00000034012/ENSSSCG00000005382/ENSSSCG00000032595/ENSSSCG00000024351/ENSSSCG00000035249/ENSSSCG00000040815/ENSSSCG00000026969/ENSSSCG00000021206/ENSSSCG00000035971/ENSSSCG00000017330/ENSSSCG00000012298/ENSSSCG00000037449/ENSSSCG00000020705/ENSSSCG00000025182
ssc04215	Apoptosis - multiple species	4/628	28/5126	0.454504622762877	0.999904640347203	ENSSSCG00000027529/ENSSSCG00000003112/ENSSSCG00000034012/ENSSSCG00000025028	BIRC3/-/CASP3/-	ssc:100622590/ssc:100517403/ssc:397244/ssc:100037300	4	0		4	ENSSSCG00000027529/ENSSSCG00000003112/ENSSSCG00000034012/ENSSSCG00000025028
ssc04710	Circadian rhythm	4/628	28/5126	0.454504622762877	0.999904640347203	ENSSSCG00000010563/ENSSSCG00000009472/ENSSSCG00000017983/ENSSSCG00000023307	BTRC/FBXL3/PER1/FBXW11	ssc:100157842/ssc:100152980/ssc:100620648/ssc:100523218	4	2	ENSSSCG00000010563/ENSSSCG00000023307	2	ENSSSCG00000009472/ENSSSCG00000017983
ssc04623	Cytosolic DNA-sensing pathway	5/628	36/5126	0.456079457613604	0.999904640347203	ENSSSCG00000001952/ENSSSCG00000017705/ENSSSCG00000030957/ENSSSCG00000026233/ENSSSCG00000012853	NFKBIA/CCL5/NFKB1/POLR3G/IRF7	ssc:406188/ssc:396613/ssc:751869/ssc:100519356/ssc:100037289	5	2	ENSSSCG00000030957/ENSSSCG00000012853	3	ENSSSCG00000001952/ENSSSCG00000017705/ENSSSCG00000026233
ssc04726	Serotonergic synapse	10/628	76/5126	0.456257308713305	0.999904640347203	ENSSSCG00000034012/ENSSSCG00000037964/ENSSSCG00000026969/ENSSSCG00000007056/ENSSSCG00000012298/ENSSSCG00000020671/ENSSSCG00000011681/ENSSSCG00000015407/ENSSSCG00000015324/ENSSSCG00000037583	CASP3/GNG10/KRAS/PLCB1/CACNA1F/SLC18A2/TRPC1/GNAI1/GNG11/GNB4	ssc:397244/ssc:100515992/ssc:100518251/ssc:100152679/ssc:100514745/ssc:100154950/ssc:100156938/ssc:100144419/ssc:100522202/ssc:100524280	10	0		10	ENSSSCG00000034012/ENSSSCG00000037964/ENSSSCG00000026969/ENSSSCG00000007056/ENSSSCG00000012298/ENSSSCG00000020671/ENSSSCG00000011681/ENSSSCG00000015407/ENSSSCG00000015324/ENSSSCG00000037583
ssc04658	Th1 and Th2 cell differentiation	9/628	68/5126	0.456645187157613	0.999904640347203	ENSSSCG00000001952/ENSSSCG00000002383/ENSSSCG00000004755/ENSSSCG00000030957/ENSSSCG00000006709/ENSSSCG00000022155/ENSSSCG00000029578/ENSSSCG00000007477/ENSSSCG00000005215	NFKBIA/FOS/DLL4/NFKB1/NOTCH2/RBPJ/NFATC3/NFATC2/JAK2	ssc:406188/ssc:100144486/ssc:100152163/ssc:751869/ssc:100153369/ssc:100518262/ssc:100739450/ssc:100134969/ssc:397201	9	5	ENSSSCG00000002383/ENSSSCG00000030957/ENSSSCG00000006709/ENSSSCG00000029578/ENSSSCG00000007477	4	ENSSSCG00000001952/ENSSSCG00000004755/ENSSSCG00000022155/ENSSSCG00000005215
ssc04622	RIG-I-like receptor signaling pathway	7/628	52/5126	0.456987352966699	0.999904640347203	ENSSSCG00000001952/ENSSSCG00000012252/ENSSSCG00000030957/ENSSSCG00000026940/ENSSSCG00000040575/ENSSSCG00000008953/ENSSSCG00000012853	NFKBIA/DDX3X/NFKB1/CASP10/ISG15/CXCL8/IRF7	ssc:406188/ssc:100515940/ssc:751869/ssc:100154896/ssc:100145895/ssc:396880/ssc:100037289	7	3	ENSSSCG00000030957/ENSSSCG00000026940/ENSSSCG00000012853	4	ENSSSCG00000001952/ENSSSCG00000012252/ENSSSCG00000040575/ENSSSCG00000008953
ssc00640	Propanoate metabolism	4/628	29/5126	0.482712830335809	0.999904640347203	ENSSSCG00000015443/ENSSSCG00000003776/ENSSSCG00000017694/ENSSSCG00000016049	DLD/ACADM/ACACA/HIBCH	ssc:397129/ssc:397104/ssc:397324/ssc:100514687	4	1	ENSSSCG00000017694	3	ENSSSCG00000015443/ENSSSCG00000003776/ENSSSCG00000016049
ssc00450	Selenocompound metabolism	2/628	13/5126	0.485437620280719	0.999904640347203	ENSSSCG00000034494/ENSSSCG00000010143	MARS2/MTR	ssc:110257078/ssc:397300	2	2	ENSSSCG00000034494/ENSSSCG00000010143	0
ssc05133	Pertussis	7/628	54/5126	0.49830817550169	0.999904640347203	ENSSSCG00000014277/ENSSSCG00000034012/ENSSSCG00000002383/ENSSSCG00000030957/ENSSSCG00000008953/ENSSSCG00000006175/ENSSSCG00000015407	IRF1/CASP3/FOS/NFKB1/CXCL8/LY96/GNAI1	ssc:396611/ssc:397244/ssc:100144486/ssc:751869/ssc:396880/ssc:100125555/ssc:100144419	7	2	ENSSSCG00000002383/ENSSSCG00000030957	5	ENSSSCG00000014277/ENSSSCG00000034012/ENSSSCG00000008953/ENSSSCG00000006175/ENSSSCG00000015407
ssc05031	Amphetamine addiction	6/628	46/5126	0.501601792768279	0.999904640347203	ENSSSCG00000008540/ENSSSCG00000002383/ENSSSCG00000031616/ENSSSCG00000016520/ENSSSCG00000020671/ENSSSCG00000010235	PPP1CB/FOS/FOSB/CREB3L2/SLC18A2/SIRT1	ssc:397378/ssc:100144486/ssc:110261009/ssc:100520468/ssc:100154950/ssc:751859	6	2	ENSSSCG00000002383/ENSSSCG00000016520	4	ENSSSCG00000008540/ENSSSCG00000031616/ENSSSCG00000020671/ENSSSCG00000010235
ssc05152	Tuberculosis	17/628	136/5126	0.504394314965287	0.999904640347203	ENSSSCG00000037653/ENSSSCG00000003928/ENSSSCG00000034012/ENSSSCG00000030957/ENSSSCG00000003749/ENSSSCG00000026940/novel.1326/ENSSSCG00000038073/ENSSSCG00000006138/ENSSSCG00000000844/ENSSSCG00000006648/ENSSSCG00000037597/ENSSSCG00000007951/ENSSSCG00000000068/novel.1322/ENSSSCG00000017753/ENSSSCG00000005215	RAB5A/PLK3/CASP3/NFKB1/PIK3C3/CASP10/-/NOD2/ATP6V0D2/NFYB/CTSS/RAB5B/CREBBP/EP300/-/KSR1/JAK2	ssc:100144499/ssc:397250/ssc:397244/ssc:751869/ssc:503700/ssc:100154896/ssc:100153403/ssc:100125838/ssc:100521494/ssc:100157587/ssc:100153090/ssc:100625381/ssc:100620215/ssc:100156226/ssc:100153403/ssc:100511282/ssc:397201	17	8	ENSSSCG00000030957/ENSSSCG00000026940/ENSSSCG00000038073/ENSSSCG00000006648/ENSSSCG00000037597/ENSSSCG00000007951/ENSSSCG00000000068/ENSSSCG00000017753	9	ENSSSCG00000037653/ENSSSCG00000003928/ENSSSCG00000034012/ENSSSCG00000003749/novel.1326/ENSSSCG00000006138/ENSSSCG00000000844/novel.1322/ENSSSCG00000005215
ssc04216	Ferroptosis	5/628	38/5126	0.505501626735133	0.999904640347203	ENSSSCG00000001488/ENSSSCG00000011848/ENSSSCG00000012583/ENSSSCG00000012173/ENSSSCG00000011700	GCLC/TFRC/ACSL4/SAT1/CP	ssc:100522018/ssc:397062/ssc:448980/ssc:397645/ssc:406870	5	1	ENSSSCG00000001488	4	ENSSSCG00000011848/ENSSSCG00000012583/ENSSSCG00000012173/ENSSSCG00000011700
ssc01522	Endocrine resistance	10/628	79/5126	0.507560744793899	0.999904640347203	ENSSSCG00000002383/ENSSSCG00000004755/ENSSSCG00000026969/ENSSSCG00000003909/ENSSSCG00000001565/ENSSSCG00000000272/ENSSSCG00000030413/ENSSSCG00000006709/ENSSSCG00000007458/ENSSSCG00000022126	FOS/DLL4/KRAS/-/CDKN1A/SP1/PIK3CA/NOTCH2/NCOA3/EGFR	ssc:100144486/ssc:100152163/ssc:100518251/ssc:100511937/ssc:100152215/ssc:396575/ssc:100621789/ssc:100153369/ssc:100135659/ssc:397070	10	6	ENSSSCG00000002383/ENSSSCG00000003909/ENSSSCG00000000272/ENSSSCG00000006709/ENSSSCG00000007458/ENSSSCG00000022126	4	ENSSSCG00000004755/ENSSSCG00000026969/ENSSSCG00000001565/ENSSSCG00000030413
ssc04973	Carbohydrate digestion and absorption	4/628	30/5126	0.510323974611765	0.999904640347203	ENSSSCG00000011735/ENSSSCG00000003909/ENSSSCG00000030413/ENSSSCG00000015084	SI/-/PIK3CA/FXYD2	ssc:100623884/ssc:100511937/ssc:100621789/ssc:541593	4	1	ENSSSCG00000003909	3	ENSSSCG00000011735/ENSSSCG00000030413/ENSSSCG00000015084
ssc05020	Prion diseases	3/628	22/5126	0.516701202188468	0.999904640347203	ENSSSCG00000017705/ENSSSCG00000014336/ENSSSCG00000015555	CCL5/EGR1/LAMC1	ssc:396613/ssc:100520726/ssc:100514785	3	2	ENSSSCG00000014336/ENSSSCG00000015555	1	ENSSSCG00000017705
ssc04144	Endocytosis	26/628	211/5126	0.520040312977739	0.999904640347203	ENSSSCG00000006775/ENSSSCG00000011027/ENSSSCG00000006201/ENSSSCG00000027206/ENSSSCG00000037653/ENSSSCG00000005382/ENSSSCG00000036828/ENSSSCG00000036075/ENSSSCG00000031147/ENSSSCG00000009925/ENSSSCG00000028113/ENSSSCG00000011848/ENSSSCG00000003807/ENSSSCG00000010250/ENSSSCG00000016399/ENSSSCG00000014121/ENSSSCG00000010995/ENSSSCG00000004893/ENSSSCG00000004639/ENSSSCG00000000840/ENSSSCG00000015115/…	CAPZA1/KIF5B/ARFGEF1/PARD6B/RAB5A/TGFBR1/SNX4/-/ACAP2/GIT2/CAPZA2/TFRC/DNAJC6/VPS26A/STAM2/ZFYVE16/CHMP5/VPS4B/USP8/WASHC4/CBL/EGFR/RAB5B/ARFGAP1/WIPF2/ASAP1	ssc:100037957/ssc:595132/ssc:100156861/ssc:100151957/ssc:100144499/ssc:396665/ssc:110256410/ssc:102165500/ssc:100627914/ssc:100154195/ssc:100037958/ssc:397062/ssc:406190/ssc:100155086/ssc:100157042/ssc:100511806/ssc:100513035/ssc:100625338/ssc:100157546/ssc:100520136/ssc:100518854/ssc:397070/ssc:100625381/ssc:110257378/ssc:100525252/ssc:106509950	26	7	ENSSSCG00000009925/ENSSSCG00000003807/ENSSSCG00000015115/ENSSSCG00000022126/ENSSSCG00000037597/ENSSSCG00000017479/ENSSSCG00000028759	19	ENSSSCG00000006775/ENSSSCG00000011027/ENSSSCG00000006201/ENSSSCG00000027206/ENSSSCG00000037653/ENSSSCG00000005382/ENSSSCG00000036828/ENSSSCG00000036075/ENSSSCG00000031147/ENSSSCG00000028113/ENSSSCG00000011848/ENSSSCG00000010250/ENSSSCG00000016399/ENSSSCG00000014121/ENSSSCG00000010995/ENSSSCG00000004893/ENSSSCG00000004639/ENSSSCG00000000840/ENSSSCG00000032235
ssc04211	Longevity regulating pathway	10/628	80/5126	0.524371938804002	0.999904640347203	ENSSSCG00000030957/ENSSSCG00000025729/ENSSSCG00000026969/ENSSSCG00000003909/ENSSSCG00000004387/ENSSSCG00000030413/ENSSSCG00000032357/ENSSSCG00000028420/ENSSSCG00000016520/ENSSSCG00000010235	NFKB1/IRS1/KRAS/-/FOXO3/PIK3CA/APPL1/EIF4E/CREB3L2/SIRT1	ssc:751869/ssc:100512686/ssc:100518251/ssc:100511937/ssc:733621/ssc:100621789/ssc:100188978/ssc:100038030/ssc:100520468/ssc:751859	10	5	ENSSSCG00000030957/ENSSSCG00000025729/ENSSSCG00000003909/ENSSSCG00000004387/ENSSSCG00000016520	5	ENSSSCG00000026969/ENSSSCG00000030413/ENSSSCG00000032357/ENSSSCG00000028420/ENSSSCG00000010235
ssc04921	Oxytocin signaling pathway	14/628	113/5126	0.525789844457007	0.999904640347203	ENSSSCG00000039947/ENSSSCG00000015402/ENSSSCG00000008540/ENSSSCG00000002383/ENSSSCG00000021893/ENSSSCG00000026969/ENSSSCG00000001565/ENSSSCG00000007056/ENSSSCG00000012298/ENSSSCG00000011867/ENSSSCG00000029578/ENSSSCG00000022126/ENSSSCG00000007477/ENSSSCG00000015407	KCNJ2/CACNA2D1/PPP1CB/FOS/ROCK1/KRAS/CDKN1A/PLCB1/CACNA1F/MYLK/NFATC3/EGFR/NFATC2/GNAI1	ssc:397293/ssc:397377/ssc:397378/ssc:100144486/ssc:397447/ssc:100518251/ssc:100152215/ssc:100152679/ssc:100514745/ssc:396848/ssc:100739450/ssc:397070/ssc:100134969/ssc:100144419	14	6	ENSSSCG00000039947/ENSSSCG00000002383/ENSSSCG00000011867/ENSSSCG00000029578/ENSSSCG00000022126/ENSSSCG00000007477	8	ENSSSCG00000015402/ENSSSCG00000008540/ENSSSCG00000021893/ENSSSCG00000026969/ENSSSCG00000001565/ENSSSCG00000007056/ENSSSCG00000012298/ENSSSCG00000015407
ssc00532	Glycosaminoglycan biosynthesis - chondroitin sulfate / dermatan sulfate	2/628	14/5126	0.526160853348621	0.999904640347203	ENSSSCG00000004825/ENSSSCG00000035371	CHSY1/-	ssc:100520288/ssc:102166124	2	2	ENSSSCG00000004825/ENSSSCG00000035371	0
ssc04923	Regulation of lipolysis in adipocytes	5/628	39/5126	0.529542136096917	0.999904640347203	ENSSSCG00000025729/ENSSSCG00000003909/ENSSSCG00000030413/ENSSSCG00000026914/ENSSSCG00000015407	IRS1/-/PIK3CA/PLA2G16/GNAI1	ssc:100512686/ssc:100511937/ssc:100621789/ssc:100512584/ssc:100144419	5	2	ENSSSCG00000025729/ENSSSCG00000003909	3	ENSSSCG00000030413/ENSSSCG00000026914/ENSSSCG00000015407
ssc04713	Circadian entrainment	8/628	64/5126	0.533152695758915	0.999904640347203	ENSSSCG00000002383/ENSSSCG00000037964/ENSSSCG00000007056/ENSSSCG00000006344/ENSSSCG00000017983/ENSSSCG00000015407/ENSSSCG00000015324/ENSSSCG00000037583	FOS/GNG10/PLCB1/NOS1AP/PER1/GNAI1/GNG11/GNB4	ssc:100144486/ssc:100515992/ssc:100152679/ssc:100620568/ssc:100620648/ssc:100144419/ssc:100522202/ssc:100524280	8	2	ENSSSCG00000002383/ENSSSCG00000006344	6	ENSSSCG00000037964/ENSSSCG00000007056/ENSSSCG00000017983/ENSSSCG00000015407/ENSSSCG00000015324/ENSSSCG00000037583
ssc04136	Autophagy - other	4/628	31/5126	0.537246405538433	0.999904640347203	ENSSSCG00000003749/ENSSSCG00000029094/ENSSSCG00000003816/ENSSSCG00000002502	PIK3C3/PIK3R4/ATG4C/ATG2B	ssc:503700/ssc:100516293/ssc:100462748/ssc:100462716	4	2	ENSSSCG00000029094/ENSSSCG00000002502	2	ENSSSCG00000003749/ENSSSCG00000003816
ssc04727	GABAergic synapse	7/628	56/5126	0.538585163807232	0.999904640347203	ENSSSCG00000037964/ENSSSCG00000016056/ENSSSCG00000012298/ENSSSCG00000015407/ENSSSCG00000015324/ENSSSCG00000037583/ENSSSCG00000012755	GNG10/GLS/CACNA1F/GNAI1/GNG11/GNB4/GABRQ	ssc:100515992/ssc:399525/ssc:100514745/ssc:100144419/ssc:100522202/ssc:100524280/ssc:100153018	7	1	ENSSSCG00000012755	6	ENSSSCG00000037964/ENSSSCG00000016056/ENSSSCG00000012298/ENSSSCG00000015407/ENSSSCG00000015324/ENSSSCG00000037583
ssc05214	Glioma	7/628	56/5126	0.538585163807232	0.999904640347203	ENSSSCG00000022689/ENSSSCG00000035249/ENSSSCG00000026969/ENSSSCG00000003909/ENSSSCG00000001565/ENSSSCG00000030413/ENSSSCG00000022126	GADD45B/GADD45G/KRAS/-/CDKN1A/PIK3CA/EGFR	ssc:100621090/ssc:100152997/ssc:100518251/ssc:100511937/ssc:100152215/ssc:100621789/ssc:397070	7	2	ENSSSCG00000003909/ENSSSCG00000022126	5	ENSSSCG00000022689/ENSSSCG00000035249/ENSSSCG00000026969/ENSSSCG00000001565/ENSSSCG00000030413
ssc04810	Regulation of actin cytoskeleton	19/628	156/5126	0.548830786394545	0.999904640347203	ENSSSCG00000035355/ENSSSCG00000015375/ENSSSCG00000016019/ENSSSCG00000008540/ENSSSCG00000021893/ENSSSCG00000026969/ENSSSCG00000003909/ENSSSCG00000003107/ENSSSCG00000017791/ENSSSCG00000009943/ENSSSCG00000012474/ENSSSCG00000030413/ENSSSCG00000033291/ENSSSCG00000011867/ENSSSCG00000012034/ENSSSCG00000022126/ENSSSCG00000017054/ENSSSCG00000003140/ENSSSCG00000010313	F2R/ITGB8/NCKAP1/PPP1CB/ROCK1/KRAS/-/ARHGAP35/SSH2/SSH1/DIAPH2/PIK3CA/PIP4K2B/MYLK/TIAM1/EGFR/CYFIP2/FGF21/VCL	ssc:100521609/ssc:100037284/ssc:100158033/ssc:397378/ssc:397447/ssc:100518251/ssc:100511937/ssc:100514580/ssc:100520864/ssc:100157825/ssc:100155257/ssc:100621789/ssc:100623031/ssc:396848/ssc:100524587/ssc:397070/ssc:100523290/ssc:100302504/ssc:396974	19	12	ENSSSCG00000035355/ENSSSCG00000003909/ENSSSCG00000003107/ENSSSCG00000017791/ENSSSCG00000009943/ENSSSCG00000033291/ENSSSCG00000011867/ENSSSCG00000012034/ENSSSCG00000022126/ENSSSCG00000017054/ENSSSCG00000003140/ENSSSCG00000010313	7	ENSSSCG00000015375/ENSSSCG00000016019/ENSSSCG00000008540/ENSSSCG00000021893/ENSSSCG00000026969/ENSSSCG00000012474/ENSSSCG00000030413
ssc05030	Cocaine addiction	5/628	40/5126	0.553049432105506	0.999904640347203	ENSSSCG00000030957/ENSSSCG00000031616/ENSSSCG00000016520/ENSSSCG00000020671/ENSSSCG00000015407	NFKB1/FOSB/CREB3L2/SLC18A2/GNAI1	ssc:751869/ssc:110261009/ssc:100520468/ssc:100154950/ssc:100144419	5	2	ENSSSCG00000030957/ENSSSCG00000016520	3	ENSSSCG00000031616/ENSSSCG00000020671/ENSSSCG00000015407
ssc04659	Th17 cell differentiation	10/628	82/5126	0.557403569954098	0.999904640347203	ENSSSCG00000001952/ENSSSCG00000005096/ENSSSCG00000016916/ENSSSCG00000002383/ENSSSCG00000005382/ENSSSCG00000030957/ENSSSCG00000021206/ENSSSCG00000029578/ENSSSCG00000007477/ENSSSCG00000005215	NFKBIA/HIF1A/IL6ST/FOS/TGFBR1/NFKB1/IL1RAP/NFATC3/NFATC2/JAK2	ssc:406188/ssc:396696/ssc:100037294/ssc:100144486/ssc:396665/ssc:751869/ssc:100628318/ssc:100739450/ssc:100134969/ssc:397201	10	4	ENSSSCG00000002383/ENSSSCG00000030957/ENSSSCG00000029578/ENSSSCG00000007477	6	ENSSSCG00000001952/ENSSSCG00000005096/ENSSSCG00000016916/ENSSSCG00000005382/ENSSSCG00000021206/ENSSSCG00000005215
ssc05142	Chagas disease (American trypanosomiasis)	10/628	82/5126	0.557403569954098	0.999904640347203	ENSSSCG00000001952/ENSSSCG00000017705/ENSSSCG00000002383/ENSSSCG00000005382/ENSSSCG00000030957/ENSSSCG00000003909/ENSSSCG00000007056/ENSSSCG00000030413/ENSSSCG00000008953/ENSSSCG00000015407	NFKBIA/CCL5/FOS/TGFBR1/NFKB1/-/PLCB1/PIK3CA/CXCL8/GNAI1	ssc:406188/ssc:396613/ssc:100144486/ssc:396665/ssc:751869/ssc:100511937/ssc:100152679/ssc:100621789/ssc:396880/ssc:100144419	10	3	ENSSSCG00000002383/ENSSSCG00000030957/ENSSSCG00000003909	7	ENSSSCG00000001952/ENSSSCG00000017705/ENSSSCG00000005382/ENSSSCG00000007056/ENSSSCG00000030413/ENSSSCG00000008953/ENSSSCG00000015407
ssc05221	Acute myeloid leukemia	7/628	57/5126	0.558227971051922	0.999904640347203	ENSSSCG00000037910/ENSSSCG00000030957/ENSSSCG00000026969/ENSSSCG00000003909/ENSSSCG00000030413/ENSSSCG00000005965/ENSSSCG00000010638	DUSP6/NFKB1/KRAS/-/PIK3CA/MYC/TCF7L2	ssc:100622968/ssc:751869/ssc:100518251/ssc:100511937/ssc:100621789/ssc:448810/ssc:100153922	7	5	ENSSSCG00000037910/ENSSSCG00000030957/ENSSSCG00000003909/ENSSSCG00000005965/ENSSSCG00000010638	2	ENSSSCG00000026969/ENSSSCG00000030413
ssc05225	Hepatocellular carcinoma	16/628	132/5126	0.559230291998102	0.999904640347203	ENSSSCG00000022689/ENSSSCG00000005382/ENSSSCG00000024351/ENSSSCG00000035249/ENSSSCG00000026969/ENSSSCG00000003909/ENSSSCG00000001565/ENSSSCG00000016140/ENSSSCG00000011340/ENSSSCG00000030413/ENSSSCG00000035859/ENSSSCG00000014920/ENSSSCG00000005965/ENSSSCG00000022126/ENSSSCG00000003559/ENSSSCG00000010638	GADD45B/TGFBR1/MET/GADD45G/KRAS/-/CDKN1A/FZD5/SMARCC1/PIK3CA/WNT5A/FZD4/MYC/EGFR/ARID1A/TCF7L2	ssc:100621090/ssc:396665/ssc:654328/ssc:100152997/ssc:100518251/ssc:100511937/ssc:100152215/ssc:100519058/ssc:100519869/ssc:100621789/ssc:100627056/ssc:100520319/ssc:448810/ssc:397070/ssc:100513359/ssc:100153922	16	9	ENSSSCG00000003909/ENSSSCG00000016140/ENSSSCG00000011340/ENSSSCG00000035859/ENSSSCG00000014920/ENSSSCG00000005965/ENSSSCG00000022126/ENSSSCG00000003559/ENSSSCG00000010638	7	ENSSSCG00000022689/ENSSSCG00000005382/ENSSSCG00000024351/ENSSSCG00000035249/ENSSSCG00000026969/ENSSSCG00000001565/ENSSSCG00000030413
ssc04150	mTOR signaling pathway	15/628	124/5126	0.563215974964899	0.999904640347203	ENSSSCG00000016266/ENSSSCG00000009793/ENSSSCG00000031888/ENSSSCG00000031175/ENSSSCG00000025729/ENSSSCG00000026969/ENSSSCG00000003909/ENSSSCG00000016140/ENSSSCG00000037719/ENSSSCG00000030413/ENSSSCG00000035859/ENSSSCG00000014920/ENSSSCG00000016577/ENSSSCG00000028420/ENSSSCG00000016853	CAB39/CLIP1/DDIT4/FNIP2/IRS1/KRAS/-/FZD5/PDPK1/PIK3CA/WNT5A/FZD4/ATP6V1F/EIF4E/RICTOR	ssc:100620726/ssc:100153677/ssc:100153821/ssc:106504653/ssc:100512686/ssc:100518251/ssc:100511937/ssc:100519058/ssc:100192445/ssc:100621789/ssc:100627056/ssc:100520319/ssc:100518811/ssc:100038030/ssc:100519575	15	7	ENSSSCG00000031175/ENSSSCG00000025729/ENSSSCG00000003909/ENSSSCG00000016140/ENSSSCG00000037719/ENSSSCG00000035859/ENSSSCG00000014920	8	ENSSSCG00000016266/ENSSSCG00000009793/ENSSSCG00000031888/ENSSSCG00000026969/ENSSSCG00000030413/ENSSSCG00000016577/ENSSSCG00000028420/ENSSSCG00000016853
ssc00140	Steroid hormone biosynthesis	4/628	32/5126	0.563402832349502	0.999904640347203	ENSSSCG00000023280/ENSSSCG00000001476/ENSSSCG00000039341/ENSSSCG00000016519	SULT2B1/HSD17B8/-/AKR1D1	ssc:100626471/ssc:100154372/ssc:397052/ssc:100520813	4	1	ENSSSCG00000016519	3	ENSSSCG00000023280/ENSSSCG00000001476/ENSSSCG00000039341
ssc04720	Long-term potentiation	6/628	49/5126	0.566151737242149	0.999904640347203	ENSSSCG00000008540/ENSSSCG00000032595/ENSSSCG00000026969/ENSSSCG00000007056/ENSSSCG00000007951/ENSSSCG00000000068	PPP1CB/RAP1B/KRAS/PLCB1/CREBBP/EP300	ssc:397378/ssc:100152555/ssc:100518251/ssc:100152679/ssc:100620215/ssc:100156226	6	2	ENSSSCG00000007951/ENSSSCG00000000068	4	ENSSSCG00000008540/ENSSSCG00000032595/ENSSSCG00000026969/ENSSSCG00000007056
ssc05164	Influenza A	14/628	116/5126	0.567530836024008	0.999904640347203	ENSSSCG00000001952/ENSSSCG00000017705/ENSSSCG00000015801/ENSSSCG00000030957/ENSSSCG00000003909/ENSSSCG00000028228/ENSSSCG00000030413/ENSSSCG00000008953/ENSSSCG00000007119/ENSSSCG00000008496/ENSSSCG00000007951/ENSSSCG00000000068/ENSSSCG00000012853/ENSSSCG00000005215	NFKBIA/CCL5/TLR3/NFKB1/-/XPO1/PIK3CA/CXCL8/NXT1/EIF2AK2/CREBBP/EP300/IRF7/JAK2	ssc:406188/ssc:396613/ssc:100037937/ssc:751869/ssc:100511937/ssc:397330/ssc:100621789/ssc:396880/ssc:100514739/ssc:397588/ssc:100620215/ssc:100156226/ssc:100037289/ssc:397201	14	5	ENSSSCG00000030957/ENSSSCG00000003909/ENSSSCG00000007951/ENSSSCG00000000068/ENSSSCG00000012853	9	ENSSSCG00000001952/ENSSSCG00000017705/ENSSSCG00000015801/ENSSSCG00000028228/ENSSSCG00000030413/ENSSSCG00000008953/ENSSSCG00000007119/ENSSSCG00000008496/ENSSSCG00000005215
ssc01521	EGFR tyrosine kinase inhibitor resistance	8/628	66/5126	0.569763604455892	0.999904640347203	ENSSSCG00000024351/ENSSSCG00000026969/ENSSSCG00000003909/ENSSSCG00000004387/ENSSSCG00000030413/ENSSSCG00000028420/ENSSSCG00000022126/ENSSSCG00000005215	MET/KRAS/-/FOXO3/PIK3CA/EIF4E/EGFR/JAK2	ssc:654328/ssc:100518251/ssc:100511937/ssc:733621/ssc:100621789/ssc:100038030/ssc:397070/ssc:397201	8	3	ENSSSCG00000003909/ENSSSCG00000004387/ENSSSCG00000022126	5	ENSSSCG00000024351/ENSSSCG00000026969/ENSSSCG00000030413/ENSSSCG00000028420/ENSSSCG00000005215
ssc04217	Necroptosis	13/628	108/5126	0.57223214282353	0.999904640347203	ENSSSCG00000027529/ENSSSCG00000015801/ENSSSCG00000004636/ENSSSCG00000021068/ENSSSCG00000025028/ENSSSCG00000010995/ENSSSCG00000004154/ENSSSCG00000004893/ENSSSCG00000036080/ENSSSCG00000008496/ENSSSCG00000013022/ENSSSCG00000034595/ENSSSCG00000005215	BIRC3/TLR3/TRPM7/TRAF5/-/CHMP5/TNFAIP3/VPS4B/-/EIF2AK2/PYGM/-/JAK2	ssc:100622590/ssc:100037937/ssc:100169932/ssc:396616/ssc:100037300/ssc:100513035/ssc:100622156/ssc:100625338/ssc:100155734/ssc:397588/ssc:733659/ssc:100157763/ssc:397201	13	1	ENSSSCG00000021068	12	ENSSSCG00000027529/ENSSSCG00000015801/ENSSSCG00000004636/ENSSSCG00000025028/ENSSSCG00000010995/ENSSSCG00000004154/ENSSSCG00000004893/ENSSSCG00000036080/ENSSSCG00000008496/ENSSSCG00000013022/ENSSSCG00000034595/ENSSSCG00000005215
ssc04728	Dopaminergic synapse	12/628	100/5126	0.577392529968748	0.999904640347203	ENSSSCG00000011027/ENSSSCG00000008540/ENSSSCG00000002383/ENSSSCG00000037964/ENSSSCG00000033185/ENSSSCG00000031498/ENSSSCG00000007056/ENSSSCG00000016520/ENSSSCG00000020671/ENSSSCG00000015407/ENSSSCG00000015324/ENSSSCG00000037583	KIF5B/PPP1CB/FOS/GNG10/PPP2R3A/PPP2R3C/PLCB1/CREB3L2/SLC18A2/GNAI1/GNG11/GNB4	ssc:595132/ssc:397378/ssc:100144486/ssc:100515992/ssc:102160080/ssc:110261574/ssc:100152679/ssc:100520468/ssc:100154950/ssc:100144419/ssc:100522202/ssc:100524280	12	2	ENSSSCG00000002383/ENSSSCG00000016520	10	ENSSSCG00000011027/ENSSSCG00000008540/ENSSSCG00000037964/ENSSSCG00000033185/ENSSSCG00000031498/ENSSSCG00000007056/ENSSSCG00000020671/ENSSSCG00000015407/ENSSSCG00000015324/ENSSSCG00000037583
ssc04721	Synaptic vesicle cycle	6/628	50/5126	0.586762392597256	0.999904640347203	ENSSSCG00000005305/ENSSSCG00000016577/ENSSSCG00000020671/ENSSSCG00000006138/ENSSSCG00000000948/ENSSSCG00000013880	UNC13B/ATP6V1F/SLC18A2/ATP6V0D2/SYT1/UNC13A	ssc:100621404/ssc:100518811/ssc:100154950/ssc:100521494/ssc:100513599/ssc:100627038	6	3	ENSSSCG00000005305/ENSSSCG00000000948/ENSSSCG00000013880	3	ENSSSCG00000016577/ENSSSCG00000020671/ENSSSCG00000006138
ssc04714	Thermogenesis	23/628	193/5126	0.591526928846786	0.999904640347203	ENSSSCG00000018069/ENSSSCG00000018084/ENSSSCG00000026969/ENSSSCG00000012583/ENSSSCG00000011340/ENSSSCG00000016520/ENSSSCG00000004480/ENSSSCG00000032129/ENSSSCG00000014331/ENSSSCG00000006070/ENSSSCG00000027307/ENSSSCG00000013936/ENSSSCG00000037869/ENSSSCG00000034019/ENSSSCG00000018078/ENSSSCG00000003140/ENSSSCG00000008195/ENSSSCG00000016100/ENSSSCG00000037455/ENSSSCG00000032390/ENSSSCG00000024144/…	ND2/ND3/KRAS/ACSL4/SMARCC1/CREB3L2/COX7A2/COX7B/KDM3B/COX6C/NDUFA11/NDUFA13/-/-/COX2/FGF21/COX5B/-/NDUFS8/NDUFB2/NDUFS7/ARID1A/ATP5I	ssc:808502/ssc:808508/ssc:100518251/ssc:448980/ssc:100519869/ssc:100520468/ssc:100038000/ssc:100516480/ssc:100515884/ssc:100037989/ssc:100514033/ssc:100622110/ssc:100525371/ssc:100037979/ssc:808504/ssc:100302504/ssc:492822/ssc:100525083/ssc:100521945/ssc:100513895/ssc:100624738/ssc:100513359/ssc:396950	23	5	ENSSSCG00000011340/ENSSSCG00000016520/ENSSSCG00000014331/ENSSSCG00000003140/ENSSSCG00000003559	18	ENSSSCG00000018069/ENSSSCG00000018084/ENSSSCG00000026969/ENSSSCG00000012583/ENSSSCG00000004480/ENSSSCG00000032129/ENSSSCG00000006070/ENSSSCG00000027307/ENSSSCG00000013936/ENSSSCG00000037869/ENSSSCG00000034019/ENSSSCG00000018078/ENSSSCG00000008195/ENSSSCG00000016100/ENSSSCG00000037455/ENSSSCG00000032390/ENSSSCG00000024144/ENSSSCG00000023903
ssc04915	Estrogen signaling pathway	12/628	101/5126	0.591910748273028	0.999904640347203	ENSSSCG00000002383/ENSSSCG00000026969/ENSSSCG00000003909/ENSSSCG00000007056/ENSSSCG00000000272/ENSSSCG00000006194/ENSSSCG00000030413/ENSSSCG00000016520/ENSSSCG00000007458/ENSSSCG00000017448/ENSSSCG00000022126/ENSSSCG00000015407	FOS/KRAS/-/PLCB1/SP1/NCOA2/PIK3CA/CREB3L2/NCOA3/KRT14/EGFR/GNAI1	ssc:100144486/ssc:100518251/ssc:100511937/ssc:100152679/ssc:396575/ssc:100135658/ssc:100621789/ssc:100520468/ssc:100135659/ssc:100515339/ssc:397070/ssc:100144419	12	7	ENSSSCG00000002383/ENSSSCG00000003909/ENSSSCG00000000272/ENSSSCG00000006194/ENSSSCG00000016520/ENSSSCG00000007458/ENSSSCG00000022126	5	ENSSSCG00000026969/ENSSSCG00000007056/ENSSSCG00000030413/ENSSSCG00000017448/ENSSSCG00000015407
ssc05162	Measles	11/628	93/5126	0.598154875263164	0.999904640347203	ENSSSCG00000001952/ENSSSCG00000003112/ENSSSCG00000030957/ENSSSCG00000003909/ENSSSCG00000036008/ENSSSCG00000004154/ENSSSCG00000030413/ENSSSCG00000008496/ENSSSCG00000006095/ENSSSCG00000012853/ENSSSCG00000005215	NFKBIA/-/NFKB1/-/TACR1/TNFAIP3/PIK3CA/EIF2AK2/CCNE2/IRF7/JAK2	ssc:406188/ssc:100517403/ssc:751869/ssc:100511937/ssc:110259991/ssc:100622156/ssc:100621789/ssc:397588/ssc:100512048/ssc:100037289/ssc:397201	11	4	ENSSSCG00000030957/ENSSSCG00000003909/ENSSSCG00000036008/ENSSSCG00000012853	7	ENSSSCG00000001952/ENSSSCG00000003112/ENSSSCG00000004154/ENSSSCG00000030413/ENSSSCG00000008496/ENSSSCG00000006095/ENSSSCG00000005215
ssc04977	Vitamin digestion and absorption	2/628	16/5126	0.600830077033039	0.999904640347203	ENSSSCG00000021968/ENSSSCG00000011030	SLC19A3/CUBN	ssc:100513826/ssc:100521743	2	2	ENSSSCG00000021968/ENSSSCG00000011030	0
ssc00760	Nicotinate and nicotinamide metabolism	3/628	25/5126	0.606558236635243	0.999904640347203	ENSSSCG00000016836/ENSSSCG00000014187/ENSSSCG00000028210	NADK2/NUDT12/NT5C	ssc:100515177/ssc:100512459/ssc:100526240	3	0		3	ENSSSCG00000016836/ENSSSCG00000014187/ENSSSCG00000028210
ssc00310	Lysine degradation	6/628	51/5126	0.60685692437023	0.999904640347203	ENSSSCG00000011689/ENSSSCG00000020663/ENSSSCG00000029082/ENSSSCG00000023324/ENSSSCG00000017382/ENSSSCG00000030217	PLOD2/KMT2C/KMT2E/KMT2A/EZH1/COLGALT2	ssc:641354/ssc:100514805/ssc:100628131/ssc:100623006/ssc:100518394/ssc:100624924	6	4	ENSSSCG00000020663/ENSSSCG00000023324/ENSSSCG00000017382/ENSSSCG00000030217	2	ENSSSCG00000011689/ENSSSCG00000029082
ssc05145	Toxoplasmosis	10/628	86/5126	0.620489241448083	0.999904640347203	ENSSSCG00000001952/ENSSSCG00000027529/ENSSSCG00000034012/ENSSSCG00000030957/ENSSSCG00000025028/ENSSSCG00000037719/ENSSSCG00000015555/ENSSSCG00000006175/ENSSSCG00000015407/ENSSSCG00000005215	NFKBIA/BIRC3/CASP3/NFKB1/-/PDPK1/LAMC1/LY96/GNAI1/JAK2	ssc:406188/ssc:100622590/ssc:397244/ssc:751869/ssc:100037300/ssc:100192445/ssc:100514785/ssc:100125555/ssc:100144419/ssc:397201	10	3	ENSSSCG00000030957/ENSSSCG00000037719/ENSSSCG00000015555	7	ENSSSCG00000001952/ENSSSCG00000027529/ENSSSCG00000034012/ENSSSCG00000025028/ENSSSCG00000006175/ENSSSCG00000015407/ENSSSCG00000005215
ssc04611	Platelet activation	12/628	104/5126	0.634074348163179	0.999904640347203	ENSSSCG00000035355/ENSSSCG00000008540/ENSSSCG00000032595/ENSSSCG00000038735/ENSSSCG00000021893/ENSSSCG00000003909/ENSSSCG00000003107/ENSSSCG00000007056/ENSSSCG00000030413/ENSSSCG00000011867/ENSSSCG00000022820/ENSSSCG00000015407	F2R/PPP1CB/RAP1B/SNAP23/ROCK1/-/ARHGAP35/PLCB1/PIK3CA/MYLK/VAMP8/GNAI1	ssc:100521609/ssc:397378/ssc:100152555/ssc:100512755/ssc:397447/ssc:100511937/ssc:100514580/ssc:100152679/ssc:100621789/ssc:396848/ssc:100620246/ssc:100144419	12	4	ENSSSCG00000035355/ENSSSCG00000003909/ENSSSCG00000003107/ENSSSCG00000011867	8	ENSSSCG00000008540/ENSSSCG00000032595/ENSSSCG00000038735/ENSSSCG00000021893/ENSSSCG00000007056/ENSSSCG00000030413/ENSSSCG00000022820/ENSSSCG00000015407
ssc05322	Systemic lupus erythematosus	5/628	44/5126	0.640778066662586	0.999904640347203	ENSSSCG00000031122/ENSSSCG00000036080/ENSSSCG00000038945/ENSSSCG00000034595/ENSSSCG00000034136	HIST1H2BB/-/HIST1H3E/-/-	ssc:110261486/ssc:100155734/ssc:100154511/ssc:100157763/ssc:100158117	5	0		5	ENSSSCG00000031122/ENSSSCG00000036080/ENSSSCG00000038945/ENSSSCG00000034595/ENSSSCG00000034136
ssc03022	Basal transcription factors	4/628	36/5126	0.659279486593512	0.999904640347203	ENSSSCG00000039888/ENSSSCG00000024019/ENSSSCG00000011127/ENSSSCG00000002411	STXBP5L/-/TAF3/GTF2A1	ssc:100624061/ssc:100739493/ssc:100620508/ssc:100154605	4	2	ENSSSCG00000039888/ENSSSCG00000011127	2	ENSSSCG00000024019/ENSSSCG00000002411
ssc00410	beta-Alanine metabolism	3/628	27/5126	0.659940968772608	0.999904640347203	ENSSSCG00000003776/ENSSSCG00000016049/ENSSSCG00000017384	ACADM/HIBCH/AOC2	ssc:397104/ssc:100514687/ssc:100520513	3	0		3	ENSSSCG00000003776/ENSSSCG00000016049/ENSSSCG00000017384
ssc00520	Amino sugar and nucleotide sugar metabolism	5/628	45/5126	0.660958844826935	0.999904640347203	ENSSSCG00000008808/ENSSSCG00000039380/ENSSSCG00000017203/ENSSSCG00000031698/ENSSSCG00000003783	GNPDA2/NANP/GALK1/TSTA3/FPGT	ssc:100516092/ssc:100518994/ssc:100521514/ssc:100620054/ssc:100513664	5	1	ENSSSCG00000039380	4	ENSSSCG00000008808/ENSSSCG00000017203/ENSSSCG00000031698/ENSSSCG00000003783
ssc04924	Renin secretion	5/628	45/5126	0.660958844826935	0.999904640347203	ENSSSCG00000039947/ENSSSCG00000023924/ENSSSCG00000007056/ENSSSCG00000012298/ENSSSCG00000015407	KCNJ2/PDE1A/PLCB1/CACNA1F/GNAI1	ssc:397293/ssc:100152819/ssc:100152679/ssc:100514745/ssc:100144419	5	1	ENSSSCG00000039947	4	ENSSSCG00000023924/ENSSSCG00000007056/ENSSSCG00000012298/ENSSSCG00000015407
ssc04971	Gastric acid secretion	5/628	45/5126	0.660958844826935	0.999904640347203	ENSSSCG00000039947/ENSSSCG00000034358/ENSSSCG00000007056/ENSSSCG00000011867/ENSSSCG00000015407	KCNJ2/KCNJ16/PLCB1/MYLK/GNAI1	ssc:397293/ssc:100519442/ssc:100152679/ssc:396848/ssc:100144419	5	3	ENSSSCG00000039947/ENSSSCG00000034358/ENSSSCG00000011867	2	ENSSSCG00000007056/ENSSSCG00000015407
ssc04510	Focal adhesion	17/628	150/5126	0.67382822857086	0.999904640347203	ENSSSCG00000027529/ENSSSCG00000015375/ENSSSCG00000008540/ENSSSCG00000032595/ENSSSCG00000024351/ENSSSCG00000025028/ENSSSCG00000021893/ENSSSCG00000001966/ENSSSCG00000003909/ENSSSCG00000003107/ENSSSCG00000037719/ENSSSCG00000030413/ENSSSCG00000011867/ENSSSCG00000015507/ENSSSCG00000022126/ENSSSCG00000015555/ENSSSCG00000010313	BIRC3/ITGB8/PPP1CB/RAP1B/MET/-/ROCK1/ARHGAP5/-/ARHGAP35/PDPK1/PIK3CA/MYLK/TNN/EGFR/LAMC1/VCL	ssc:100622590/ssc:100037284/ssc:397378/ssc:100152555/ssc:654328/ssc:100037300/ssc:397447/ssc:100520849/ssc:100511937/ssc:100514580/ssc:100192445/ssc:100621789/ssc:396848/ssc:102163961/ssc:397070/ssc:100514785/ssc:396974	17	8	ENSSSCG00000003909/ENSSSCG00000003107/ENSSSCG00000037719/ENSSSCG00000011867/ENSSSCG00000015507/ENSSSCG00000022126/ENSSSCG00000015555/ENSSSCG00000010313	9	ENSSSCG00000027529/ENSSSCG00000015375/ENSSSCG00000008540/ENSSSCG00000032595/ENSSSCG00000024351/ENSSSCG00000025028/ENSSSCG00000021893/ENSSSCG00000001966/ENSSSCG00000030413
ssc05412	Arrhythmogenic right ventricular cardiomyopathy (ARVC)	5/628	46/5126	0.680392631663357	0.999904640347203	ENSSSCG00000006496/ENSSSCG00000015402/ENSSSCG00000015375/ENSSSCG00000012298/ENSSSCG00000010638	LMNA/CACNA2D1/ITGB8/CACNA1F/TCF7L2	ssc:100126859/ssc:397377/ssc:100037284/ssc:100514745/ssc:100153922	5	1	ENSSSCG00000010638	4	ENSSSCG00000006496/ENSSSCG00000015402/ENSSSCG00000015375/ENSSSCG00000012298
ssc04022	cGMP-PKG signaling pathway	14/628	125/5126	0.682758644442994	0.999904640347203	ENSSSCG00000008540/ENSSSCG00000025729/ENSSSCG00000021893/ENSSSCG00000007056/ENSSSCG00000023084/ENSSSCG00000012298/ENSSSCG00000015273/ENSSSCG00000015084/ENSSSCG00000011867/ENSSSCG00000016520/ENSSSCG00000029578/ENSSSCG00000008122/ENSSSCG00000007477/ENSSSCG00000015407	PPP1CB/IRS1/ROCK1/PLCB1/ATP2B2/CACNA1F/ATP2B4/FXYD2/MYLK/CREB3L2/NFATC3/ADRA2B/NFATC2/GNAI1	ssc:397378/ssc:100512686/ssc:397447/ssc:100152679/ssc:100625418/ssc:100514745/ssc:100623420/ssc:541593/ssc:396848/ssc:100520468/ssc:100739450/ssc:641353/ssc:100134969/ssc:100144419	14	8	ENSSSCG00000025729/ENSSSCG00000023084/ENSSSCG00000015273/ENSSSCG00000011867/ENSSSCG00000016520/ENSSSCG00000029578/ENSSSCG00000008122/ENSSSCG00000007477	6	ENSSSCG00000008540/ENSSSCG00000021893/ENSSSCG00000007056/ENSSSCG00000012298/ENSSSCG00000015084/ENSSSCG00000015407
ssc04152	AMPK signaling pathway	12/628	108/5126	0.686605253430117	0.999904640347203	ENSSSCG00000016266/ENSSSCG00000015660/ENSSSCG00000033185/ENSSSCG00000025729/ENSSSCG00000017694/ENSSSCG00000003909/ENSSSCG00000031498/ENSSSCG00000004387/ENSSSCG00000037719/ENSSSCG00000030413/ENSSSCG00000016520/ENSSSCG00000010235	CAB39/PFKFB2/PPP2R3A/IRS1/ACACA/-/PPP2R3C/FOXO3/PDPK1/PIK3CA/CREB3L2/SIRT1	ssc:100620726/ssc:100523270/ssc:102160080/ssc:100512686/ssc:397324/ssc:100511937/ssc:110261574/ssc:733621/ssc:100192445/ssc:100621789/ssc:100520468/ssc:751859	12	7	ENSSSCG00000015660/ENSSSCG00000025729/ENSSSCG00000017694/ENSSSCG00000003909/ENSSSCG00000004387/ENSSSCG00000037719/ENSSSCG00000016520	5	ENSSSCG00000016266/ENSSSCG00000033185/ENSSSCG00000031498/ENSSSCG00000030413/ENSSSCG00000010235
ssc04964	Proximal tubule bicarbonate reclamation	2/628	19/5126	0.695609103796644	0.999904640347203	ENSSSCG00000016056/ENSSSCG00000015084	GLS/FXYD2	ssc:399525/ssc:541593	2	0		2	ENSSSCG00000016056/ENSSSCG00000015084
ssc04630	Jak-STAT signaling pathway	12/628	109/5126	0.699017569493696	0.999904640347203	ENSSSCG00000016916/ENSSSCG00000032332/ENSSSCG00000016399/ENSSSCG00000003909/ENSSSCG00000001565/ENSSSCG00000030413/ENSSSCG00000005965/ENSSSCG00000022126/ENSSSCG00000007951/ENSSSCG00000040725/ENSSSCG00000000068/ENSSSCG00000005215	IL6ST/SOCS4/STAM2/-/CDKN1A/PIK3CA/MYC/EGFR/CREBBP/IL11/EP300/JAK2	ssc:100037294/ssc:100302366/ssc:100157042/ssc:100511937/ssc:100152215/ssc:100621789/ssc:448810/ssc:397070/ssc:100620215/ssc:110261056/ssc:100156226/ssc:397201	12	5	ENSSSCG00000003909/ENSSSCG00000005965/ENSSSCG00000022126/ENSSSCG00000007951/ENSSSCG00000000068	7	ENSSSCG00000016916/ENSSSCG00000032332/ENSSSCG00000016399/ENSSSCG00000001565/ENSSSCG00000030413/ENSSSCG00000040725/ENSSSCG00000005215
ssc04610	Complement and coagulation cascades	5/628	47/5126	0.699066956020203	0.999904640347203	ENSSSCG00000010312/ENSSSCG00000032434/ENSSSCG00000035355/ENSSSCG00000022447/ENSSSCG00000007115	PLAU/PLAUR/F2R/F3/THBD	ssc:396985/ssc:100521017/ssc:100521609/ssc:396677/ssc:100157642	5	2	ENSSSCG00000035355/ENSSSCG00000007115	3	ENSSSCG00000010312/ENSSSCG00000032434/ENSSSCG00000022447
ssc05014	Amyotrophic lateral sclerosis (ALS)	4/628	38/5126	0.701524241531217	0.999904640347203	ENSSSCG00000016109/ENSSSCG00000037653/ENSSSCG00000034012/ENSSSCG00000012934	ALS2/RAB5A/CASP3/CCS	ssc:100626864/ssc:100144499/ssc:397244/ssc:414913	4	1	ENSSSCG00000016109	3	ENSSSCG00000037653/ENSSSCG00000034012/ENSSSCG00000012934
ssc04514	Cell adhesion molecules (CAMs)	9/628	83/5126	0.703262026373646	0.999904640347203	ENSSSCG00000007718/ENSSSCG00000015375/ENSSSCG00000040904/ENSSSCG00000012030/ENSSSCG00000014136/ENSSSCG00000037319/ENSSSCG00000017934/ENSSSCG00000039500/ENSSSCG00000025784	CLDN4/ITGB8/CLDN1/CLDN8/VCAN/PDCD1/CLDN7/-/CDH4	ssc:733578/ssc:100037284/ssc:100625166/ssc:100302021/ssc:100514895/ssc:100533201/ssc:100127486/ssc:492312/ssc:100626354	9	3	ENSSSCG00000040904/ENSSSCG00000012030/ENSSSCG00000025784	6	ENSSSCG00000007718/ENSSSCG00000015375/ENSSSCG00000014136/ENSSSCG00000037319/ENSSSCG00000017934/ENSSSCG00000039500
ssc00051	Fructose and mannose metabolism	3/628	29/5126	0.707887234135079	0.999904640347203	ENSSSCG00000015660/ENSSSCG00000031698/ENSSSCG00000003783	PFKFB2/TSTA3/FPGT	ssc:100523270/ssc:100620054/ssc:100513664	3	1	ENSSSCG00000015660	2	ENSSSCG00000031698/ENSSSCG00000003783
ssc05231	Choline metabolism in cancer	9/628	84/5126	0.716913991088488	0.999904640347203	ENSSSCG00000005096/ENSSSCG00000002383/ENSSSCG00000026969/ENSSSCG00000003909/ENSSSCG00000000272/ENSSSCG00000037719/ENSSSCG00000030413/ENSSSCG00000011845/ENSSSCG00000022126	HIF1A/FOS/KRAS/-/SP1/PDPK1/PIK3CA/PCYT1A/EGFR	ssc:396696/ssc:100144486/ssc:100518251/ssc:100511937/ssc:396575/ssc:100192445/ssc:100621789/ssc:100512194/ssc:397070	9	6	ENSSSCG00000002383/ENSSSCG00000003909/ENSSSCG00000000272/ENSSSCG00000037719/ENSSSCG00000011845/ENSSSCG00000022126	3	ENSSSCG00000005096/ENSSSCG00000026969/ENSSSCG00000030413
ssc04012	ErbB signaling pathway	8/628	76/5126	0.729601301826601	0.999904640347203	ENSSSCG00000038185/ENSSSCG00000026969/ENSSSCG00000003909/ENSSSCG00000001565/ENSSSCG00000030413/ENSSSCG00000015115/ENSSSCG00000005965/ENSSSCG00000022126	EREG/KRAS/-/CDKN1A/PIK3CA/CBL/MYC/EGFR	ssc:100620969/ssc:100518251/ssc:100511937/ssc:100152215/ssc:100621789/ssc:100518854/ssc:448810/ssc:397070	8	4	ENSSSCG00000003909/ENSSSCG00000015115/ENSSSCG00000005965/ENSSSCG00000022126	4	ENSSSCG00000038185/ENSSSCG00000026969/ENSSSCG00000001565/ENSSSCG00000030413
ssc04920	Adipocytokine signaling pathway	6/628	58/5126	0.731113700412261	0.999904640347203	ENSSSCG00000001952/ENSSSCG00000030957/ENSSSCG00000025729/ENSSSCG00000012583/ENSSSCG00000000006/ENSSSCG00000005215	NFKBIA/NFKB1/IRS1/ACSL4/PPARA/JAK2	ssc:406188/ssc:751869/ssc:100512686/ssc:448980/ssc:397239/ssc:397201	6	3	ENSSSCG00000030957/ENSSSCG00000025729/ENSSSCG00000000006	3	ENSSSCG00000001952/ENSSSCG00000012583/ENSSSCG00000005215
ssc04970	Salivary secretion	5/628	49/5126	0.734113691075027	0.999904640347203	ENSSSCG00000007056/ENSSSCG00000014255/ENSSSCG00000023084/ENSSSCG00000015273/ENSSSCG00000015084	PLCB1/SLC12A2/ATP2B2/ATP2B4/FXYD2	ssc:100152679/ssc:100516960/ssc:100625418/ssc:100623420/ssc:541593	5	2	ENSSSCG00000023084/ENSSSCG00000015273	3	ENSSSCG00000007056/ENSSSCG00000014255/ENSSSCG00000015084
ssc04925	Aldosterone synthesis and secretion	7/628	68/5126	0.744122372074831	0.999904640347203	ENSSSCG00000007056/ENSSSCG00000023084/ENSSSCG00000012298/ENSSSCG00000015273/ENSSSCG00000016520/ENSSSCG00000001975/ENSSSCG00000008495	PLCB1/ATP2B2/CACNA1F/ATP2B4/CREB3L2/PRKD1/PRKD3	ssc:100152679/ssc:100625418/ssc:100514745/ssc:100623420/ssc:100520468/ssc:102165436/ssc:100523181	7	4	ENSSSCG00000023084/ENSSSCG00000015273/ENSSSCG00000016520/ENSSSCG00000001975	3	ENSSSCG00000007056/ENSSSCG00000012298/ENSSSCG00000008495
ssc03060	Protein export	2/628	21/5126	0.747872170428495	0.999904640347203	ENSSSCG00000029608/ENSSSCG00000013322	SEC62/-	ssc:100125961/ssc:100514893	2	0		2	ENSSSCG00000029608/ENSSSCG00000013322
ssc04966	Collecting duct acid secretion	2/628	21/5126	0.747872170428495	0.999904640347203	ENSSSCG00000016577/ENSSSCG00000006138	ATP6V1F/ATP6V0D2	ssc:100518811/ssc:100521494	2	0		2	ENSSSCG00000016577/ENSSSCG00000006138
ssc04530	Tight junction	14/628	132/5126	0.758873866150533	0.999904640347203	ENSSSCG00000007718/ENSSSCG00000027206/ENSSSCG00000040904/ENSSSCG00000012030/ENSSSCG00000021893/ENSSSCG00000002287/ENSSSCG00000026571/ENSSSCG00000014267/ENSSSCG00000004018/ENSSSCG00000012034/ENSSSCG00000035038/ENSSSCG00000017934/ENSSSCG00000004854/ENSSSCG00000031488	CLDN4/PARD6B/CLDN1/CLDN8/ROCK1/MPP5/RAB8B/-/AFDN/TIAM1/CGNL1/CLDN7/-/ARHGAP17	ssc:733578/ssc:100151957/ssc:100625166/ssc:100302021/ssc:397447/ssc:100152635/ssc:100153972/ssc:100521255/ssc:100514741/ssc:100524587/ssc:100621470/ssc:100127486/ssc:100736682/ssc:100521615	14	7	ENSSSCG00000040904/ENSSSCG00000012030/ENSSSCG00000004018/ENSSSCG00000012034/ENSSSCG00000035038/ENSSSCG00000004854/ENSSSCG00000031488	7	ENSSSCG00000007718/ENSSSCG00000027206/ENSSSCG00000021893/ENSSSCG00000002287/ENSSSCG00000026571/ENSSSCG00000014267/ENSSSCG00000017934
ssc05410	Hypertrophic cardiomyopathy (HCM)	5/628	51/5126	0.766097919877157	0.999904640347203	ENSSSCG00000006496/ENSSSCG00000015402/ENSSSCG00000015375/ENSSSCG00000012298/ENSSSCG00000011441	LMNA/CACNA2D1/ITGB8/CACNA1F/TNNC1	ssc:100126859/ssc:397377/ssc:100037284/ssc:100514745/ssc:100156435	5	0		5	ENSSSCG00000006496/ENSSSCG00000015402/ENSSSCG00000015375/ENSSSCG00000012298/ENSSSCG00000011441
ssc04722	Neurotrophin signaling pathway	10/628	97/5126	0.766709764647262	0.999904640347203	ENSSSCG00000001952/ENSSSCG00000032595/ENSSSCG00000030957/ENSSSCG00000025729/ENSSSCG00000026969/ENSSSCG00000003909/ENSSSCG00000004387/ENSSSCG00000037719/ENSSSCG00000030413/ENSSSCG00000008644	NFKBIA/RAP1B/NFKB1/IRS1/KRAS/-/FOXO3/PDPK1/PIK3CA/KIDINS220	ssc:406188/ssc:100152555/ssc:751869/ssc:100512686/ssc:100518251/ssc:100511937/ssc:733621/ssc:100192445/ssc:100621789/ssc:100514284	10	6	ENSSSCG00000030957/ENSSSCG00000025729/ENSSSCG00000003909/ENSSSCG00000004387/ENSSSCG00000037719/ENSSSCG00000008644	4	ENSSSCG00000001952/ENSSSCG00000032595/ENSSSCG00000026969/ENSSSCG00000030413
ssc05132	Salmonella infection	6/628	61/5126	0.774987331280305	0.999904640347203	ENSSSCG00000002383/ENSSSCG00000030957/ENSSSCG00000021893/ENSSSCG00000008953/ENSSSCG00000008959/ENSSSCG00000004854	FOS/NFKB1/ROCK1/CXCL8/CXCL2/-	ssc:100144486/ssc:751869/ssc:397447/ssc:396880/ssc:414904/ssc:100736682	6	3	ENSSSCG00000002383/ENSSSCG00000030957/ENSSSCG00000004854	3	ENSSSCG00000021893/ENSSSCG00000008953/ENSSSCG00000008959
ssc04141	Protein processing in endoplasmic reticulum	15/628	143/5126	0.779053866155403	0.999904640347203	ENSSSCG00000040663/ENSSSCG00000004908/ENSSSCG00000003155/ENSSSCG00000040751/ENSSSCG00000029608/ENSSSCG00000016017/ENSSSCG00000009077/ENSSSCG00000009142/ENSSSCG00000002446/ENSSSCG00000008496/ENSSSCG00000039613/ENSSSCG00000015659/ENSSSCG00000012784/ENSSSCG00000009502/ENSSSCG00000004032	HERPUD1/LMAN1/PPP1R15A/DDIT3/SEC62/DNAJC10/HSPA4L/SEC24B/-/EIF2AK2/SVIP/YOD1/SSR4/UGGT2/PRKN	ssc:100622579/ssc:100153007/ssc:100522679/ssc:100240743/ssc:100125961/ssc:100523288/ssc:100517044/ssc:100622653/ssc:100144422/ssc:397588/ssc:100625679/ssc:100520400/ssc:100523300/ssc:100154594/ssc:733673	15	2	ENSSSCG00000009142/ENSSSCG00000004032	13	ENSSSCG00000040663/ENSSSCG00000004908/ENSSSCG00000003155/ENSSSCG00000040751/ENSSSCG00000029608/ENSSSCG00000016017/ENSSSCG00000009077/ENSSSCG00000002446/ENSSSCG00000008496/ENSSSCG00000039613/ENSSSCG00000015659/ENSSSCG00000012784/ENSSSCG00000009502
ssc04918	Thyroid hormone synthesis	5/628	52/5126	0.78095885504112	0.999904640347203	ENSSSCG00000021973/ENSSSCG00000007056/ENSSSCG00000015084/ENSSSCG00000016520/ENSSSCG00000040746	GPX8/PLCB1/FXYD2/CREB3L2/LRP2	ssc:100519691/ssc:100152679/ssc:541593/ssc:100520468/ssc:100519689	5	2	ENSSSCG00000016520/ENSSSCG00000040746	3	ENSSSCG00000021973/ENSSSCG00000007056/ENSSSCG00000015084
ssc04020	Calcium signaling pathway	13/628	126/5126	0.787136195849999	0.999904640347203	ENSSSCG00000035355/ENSSSCG00000023924/ENSSSCG00000036008/ENSSSCG00000039548/ENSSSCG00000007056/ENSSSCG00000023084/ENSSSCG00000012298/ENSSSCG00000015273/ENSSSCG00000011867/ENSSSCG00000022126/ENSSSCG00000007424/ENSSSCG00000011441/ENSSSCG00000010054	F2R/PDE1A/TACR1/PTGFR/PLCB1/ATP2B2/CACNA1F/ATP2B4/MYLK/EGFR/TNNC2/TNNC1/ADORA2A	ssc:100521609/ssc:100152819/ssc:110259991/ssc:397126/ssc:100152679/ssc:100625418/ssc:100514745/ssc:100623420/ssc:396848/ssc:397070/ssc:414905/ssc:100156435/ssc:503661	13	7	ENSSSCG00000035355/ENSSSCG00000036008/ENSSSCG00000023084/ENSSSCG00000015273/ENSSSCG00000011867/ENSSSCG00000022126/ENSSSCG00000007424	6	ENSSSCG00000023924/ENSSSCG00000039548/ENSSSCG00000007056/ENSSSCG00000012298/ENSSSCG00000011441/ENSSSCG00000010054
ssc00250	Alanine, aspartate and glutamate metabolism	3/628	33/5126	0.787935364049635	0.999904640347203	ENSSSCG00000016056/ENSSSCG00000007738/ENSSSCG00000005701	GLS/-/ASS1	ssc:399525/ssc:100517757/ssc:414411	3	0		3	ENSSSCG00000016056/ENSSSCG00000007738/ENSSSCG00000005701
ssc04978	Mineral absorption	3/628	33/5126	0.787935364049635	0.999904640347203	ENSSSCG00000004636/ENSSSCG00000015084/ENSSSCG00000026414	TRPM7/FXYD2/ATOX1	ssc:100169932/ssc:541593/ssc:100312962	3	0		3	ENSSSCG00000004636/ENSSSCG00000015084/ENSSSCG00000026414
ssc04930	Type II diabetes mellitus	4/628	43/5126	0.790193443456327	0.999904640347203	ENSSSCG00000032332/ENSSSCG00000025729/ENSSSCG00000003909/ENSSSCG00000030413	SOCS4/IRS1/-/PIK3CA	ssc:100302366/ssc:100512686/ssc:100511937/ssc:100621789	4	2	ENSSSCG00000025729/ENSSSCG00000003909	2	ENSSSCG00000032332/ENSSSCG00000030413
ssc05140	Leishmaniasis	5/628	53/5126	0.795081478405205	0.999904640347203	ENSSSCG00000001952/ENSSSCG00000002383/ENSSSCG00000030957/ENSSSCG00000031493/ENSSSCG00000005215	NFKBIA/FOS/NFKB1/CYBA/JAK2	ssc:406188/ssc:100144486/ssc:751869/ssc:397507/ssc:397201	5	2	ENSSSCG00000002383/ENSSSCG00000030957	3	ENSSSCG00000001952/ENSSSCG00000031493/ENSSSCG00000005215
ssc03320	PPAR signaling pathway	5/628	54/5126	0.808481031543344	0.999904640347203	ENSSSCG00000003776/ENSSSCG00000012583/ENSSSCG00000037719/ENSSSCG00000000006/ENSSSCG00000010494	ACADM/ACSL4/PDPK1/PPARA/SORBS1	ssc:397104/ssc:448980/ssc:100192445/ssc:397239/ssc:100153151	5	3	ENSSSCG00000037719/ENSSSCG00000000006/ENSSSCG00000010494	2	ENSSSCG00000003776/ENSSSCG00000012583
ssc05414	Dilated cardiomyopathy (DCM)	5/628	54/5126	0.808481031543344	0.999904640347203	ENSSSCG00000006496/ENSSSCG00000015402/ENSSSCG00000015375/ENSSSCG00000012298/ENSSSCG00000011441	LMNA/CACNA2D1/ITGB8/CACNA1F/TNNC1	ssc:100126859/ssc:397377/ssc:100037284/ssc:100514745/ssc:100156435	5	0		5	ENSSSCG00000006496/ENSSSCG00000015402/ENSSSCG00000015375/ENSSSCG00000012298/ENSSSCG00000011441
ssc00040	Pentose and glucuronate interconversions	1/628	13/5126	0.817523570322475	0.999904640347203	ENSSSCG00000039873	DCXR	ssc:110255927	1	0		1	ENSSSCG00000039873
ssc00592	alpha-Linolenic acid metabolism	1/628	13/5126	0.817523570322475	0.999904640347203	ENSSSCG00000026914	PLA2G16	ssc:100512584	1	0		1	ENSSSCG00000026914
ssc00730	Thiamine metabolism	1/628	13/5126	0.817523570322475	0.999904640347203	ENSSSCG00000040337	-	ssc:733667	1	1	ENSSSCG00000040337	0
ssc00565	Ether lipid metabolism	3/628	35/5126	0.820611278491159	0.999904640347203	ENSSSCG00000023983/ENSSSCG00000026914/ENSSSCG00000029070	AGPS/PLA2G16/PAFAH1B3	ssc:100627169/ssc:100512584/ssc:100514845	3	0		3	ENSSSCG00000023983/ENSSSCG00000026914/ENSSSCG00000029070
ssc04071	Sphingolipid signaling pathway	10/628	103/5126	0.82749020596338	0.999904640347203	ENSSSCG00000030957/ENSSSCG00000033185/ENSSSCG00000021893/ENSSSCG00000026969/ENSSSCG00000003909/ENSSSCG00000031498/ENSSSCG00000007056/ENSSSCG00000037719/ENSSSCG00000030413/ENSSSCG00000015407	NFKB1/PPP2R3A/ROCK1/KRAS/-/PPP2R3C/PLCB1/PDPK1/PIK3CA/GNAI1	ssc:751869/ssc:102160080/ssc:397447/ssc:100518251/ssc:100511937/ssc:110261574/ssc:100152679/ssc:100192445/ssc:100621789/ssc:100144419	10	3	ENSSSCG00000030957/ENSSSCG00000003909/ENSSSCG00000037719	7	ENSSSCG00000033185/ENSSSCG00000021893/ENSSSCG00000026969/ENSSSCG00000031498/ENSSSCG00000007056/ENSSSCG00000030413/ENSSSCG00000015407
ssc00563	Glycosylphosphatidylinositol (GPI)-anchor biosynthesis	2/628	25/5126	0.829565919460409	0.999904640347203	ENSSSCG00000016073/ENSSSCG00000038329	PGAP1/PIGK	ssc:100620753/ssc:606750	2	0		2	ENSSSCG00000016073/ENSSSCG00000038329
ssc04672	Intestinal immune network for IgA production	2/628	25/5126	0.829565919460409	0.999904640347203	ENSSSCG00000017330/ENSSSCG00000039500	MAP3K14/-	ssc:100520402/ssc:492312	2	0		2	ENSSSCG00000017330/ENSSSCG00000039500
ssc00983	Drug metabolism - other enzymes	4/628	46/5126	0.832420785081275	0.999904640347203	ENSSSCG00000001073/ENSSSCG00000006294/ENSSSCG00000030388/ENSSSCG00000036139	TPMT/NME7/UPP1/RRM2B	ssc:100157630/ssc:100152763/ssc:100625277/ssc:100157205	4	0		4	ENSSSCG00000001073/ENSSSCG00000006294/ENSSSCG00000030388/ENSSSCG00000036139
ssc04927	Cortisol synthesis and secretion	4/628	46/5126	0.832420785081275	0.999904640347203	ENSSSCG00000007056/ENSSSCG00000000272/ENSSSCG00000012298/ENSSSCG00000016520	PLCB1/SP1/CACNA1F/CREB3L2	ssc:100152679/ssc:396575/ssc:100514745/ssc:100520468	4	2	ENSSSCG00000000272/ENSSSCG00000016520	2	ENSSSCG00000007056/ENSSSCG00000012298
ssc00260	Glycine, serine and threonine metabolism	3/628	36/5126	0.835277805027308	0.999904640347203	ENSSSCG00000015443/ENSSSCG00000014108/ENSSSCG00000017384	DLD/BHMT/AOC2	ssc:397129/ssc:397371/ssc:100520513	3	0		3	ENSSSCG00000015443/ENSSSCG00000014108/ENSSSCG00000017384
ssc00670	One carbon pool by folate	1/628	14/5126	0.839936087012771	0.999904640347203	ENSSSCG00000010143	MTR	ssc:397300	1	1	ENSSSCG00000010143	0
ssc04370	VEGF signaling pathway	4/628	47/5126	0.844825792435793	0.999904640347203	ENSSSCG00000026969/ENSSSCG00000003909/ENSSSCG00000030413/ENSSSCG00000007477	KRAS/-/PIK3CA/NFATC2	ssc:100518251/ssc:100511937/ssc:100621789/ssc:100134969	4	2	ENSSSCG00000003909/ENSSSCG00000007477	2	ENSSSCG00000026969/ENSSSCG00000030413
ssc00052	Galactose metabolism	2/628	26/5126	0.845869248556707	0.999904640347203	ENSSSCG00000011735/ENSSSCG00000017203	SI/GALK1	ssc:100623884/ssc:100521514	2	0		2	ENSSSCG00000011735/ENSSSCG00000017203
ssc00630	Glyoxylate and dicarboxylate metabolism	2/628	26/5126	0.845869248556707	0.999904640347203	ENSSSCG00000015443/ENSSSCG00000003940	DLD/HYI	ssc:397129/ssc:100517478	2	0		2	ENSSSCG00000015443/ENSSSCG00000003940
ssc03015	mRNA surveillance pathway	7/628	77/5126	0.849136766127048	0.999904640347203	ENSSSCG00000010430/ENSSSCG00000004169/ENSSSCG00000008540/ENSSSCG00000033185/ENSSSCG00000031498/ENSSSCG00000007119/ENSSSCG00000011117	CSTF2T/HBS1L/PPP1CB/PPP2R3A/PPP2R3C/NXT1/-	ssc:100157243/ssc:100158211/ssc:397378/ssc:102160080/ssc:110261574/ssc:100514739/ssc:100621126	7	1	ENSSSCG00000010430	6	ENSSSCG00000004169/ENSSSCG00000008540/ENSSSCG00000033185/ENSSSCG00000031498/ENSSSCG00000007119/ENSSSCG00000011117
ssc00591	Linoleic acid metabolism	1/628	15/5126	0.859599650658307	0.999904640347203	ENSSSCG00000026914	PLA2G16	ssc:100512584	1	0		1	ENSSSCG00000026914
ssc01210	2-Oxocarboxylic acid metabolism	1/628	15/5126	0.859599650658307	0.999904640347203	ENSSSCG00000023325	-	ssc:396930	1	0		1	ENSSSCG00000023325
ssc00500	Starch and sucrose metabolism	2/628	27/5126	0.860743510939435	0.999904640347203	ENSSSCG00000011735/ENSSSCG00000013022	SI/PYGM	ssc:100623884/ssc:733659	2	0		2	ENSSSCG00000011735/ENSSSCG00000013022
ssc03040	Spliceosome	11/628	117/5126	0.86501810741944	0.999904640347203	ENSSSCG00000015867/ENSSSCG00000017033/ENSSSCG00000011684/ENSSSCG00000026644/ENSSSCG00000036293/ENSSSCG00000033500/ENSSSCG00000012639/ENSSSCG00000008587/ENSSSCG00000011601/ENSSSCG00000026064/ENSSSCG00000024776	-/SLU7/U2SURP/DDX46/SRSF10/SNRPD2/THOC2/SF3B6/LSM3/-/-	ssc:100157937/ssc:100517791/ssc:100517309/ssc:100626833/ssc:100625186/ssc:100626720/ssc:100154832/ssc:100521960/ssc:100514071/ssc:100624767/ssc:100525867	11	0		11	ENSSSCG00000015867/ENSSSCG00000017033/ENSSSCG00000011684/ENSSSCG00000026644/ENSSSCG00000036293/ENSSSCG00000033500/ENSSSCG00000012639/ENSSSCG00000008587/ENSSSCG00000011601/ENSSSCG00000026064/ENSSSCG00000024776
ssc04540	Gap junction	6/628	69/5126	0.865494295555373	0.999904640347203	ENSSSCG00000026969/ENSSSCG00000007056/ENSSSCG00000022126/ENSSSCG00000004854/ENSSSCG00000010214/ENSSSCG00000015407	KRAS/PLCB1/EGFR/-/-/GNAI1	ssc:100518251/ssc:100152679/ssc:397070/ssc:100736682/ssc:100155762/ssc:100144419	6	2	ENSSSCG00000022126/ENSSSCG00000004854	4	ENSSSCG00000026969/ENSSSCG00000007056/ENSSSCG00000010214/ENSSSCG00000015407
ssc05100	Bacterial invasion of epithelial cells	6/628	69/5126	0.865494295555373	0.999904640347203	ENSSSCG00000030197/ENSSSCG00000024351/ENSSSCG00000003909/ENSSSCG00000030413/ENSSSCG00000015115/ENSSSCG00000010313	CD2AP/MET/-/PIK3CA/CBL/VCL	ssc:100154585/ssc:654328/ssc:100511937/ssc:100621789/ssc:100518854/ssc:396974	6	3	ENSSSCG00000003909/ENSSSCG00000015115/ENSSSCG00000010313	3	ENSSSCG00000030197/ENSSSCG00000024351/ENSSSCG00000030413
ssc00360	Phenylalanine metabolism	1/628	16/5126	0.876850955566659	0.999904640347203	ENSSSCG00000017384	AOC2	ssc:100520513	1	0		1	ENSSSCG00000017384
ssc04744	Phototransduction	1/628	16/5126	0.876850955566659	0.999904640347203	ENSSSCG00000016301	SAG	ssc:397151	1	0		1	ENSSSCG00000016301
ssc00480	Glutathione metabolism	3/628	40/5126	0.884042185848725	0.999904640347203	ENSSSCG00000001488/ENSSSCG00000021973/ENSSSCG00000036139	GCLC/GPX8/RRM2B	ssc:100522018/ssc:100519691/ssc:100157205	3	1	ENSSSCG00000001488	2	ENSSSCG00000021973/ENSSSCG00000036139
ssc04979	Cholesterol metabolism	3/628	40/5126	0.884042185848725	0.999904640347203	ENSSSCG00000040746/ENSSSCG00000000033/ENSSSCG00000003088	LRP2/TSPO/APOE	ssc:100519689/ssc:396592/ssc:397576	3	1	ENSSSCG00000040746	2	ENSSSCG00000000033/ENSSSCG00000003088
ssc04724	Glutamatergic synapse	7/628	82/5126	0.890536004014493	0.999904640347203	ENSSSCG00000037964/ENSSSCG00000016056/ENSSSCG00000007056/ENSSSCG00000011681/ENSSSCG00000015407/ENSSSCG00000015324/ENSSSCG00000037583	GNG10/GLS/PLCB1/TRPC1/GNAI1/GNG11/GNB4	ssc:100515992/ssc:399525/ssc:100152679/ssc:100156938/ssc:100144419/ssc:100522202/ssc:100524280	7	0		7	ENSSSCG00000037964/ENSSSCG00000016056/ENSSSCG00000007056/ENSSSCG00000011681/ENSSSCG00000015407/ENSSSCG00000015324/ENSSSCG00000037583
ssc00511	Other glycan degradation	1/628	17/5126	0.891985515234788	0.999904640347203	ENSSSCG00000021638	NEU3	ssc:100739223	1	1	ENSSSCG00000021638	0
ssc00534	Glycosaminoglycan biosynthesis - heparan sulfate / heparin	1/628	17/5126	0.891985515234788	0.999904640347203	ENSSSCG00000039318	-	ssc:100737777	1	1	ENSSSCG00000039318	0
ssc00770	Pantothenate and CoA biosynthesis	1/628	17/5126	0.891985515234788	0.999904640347203	ENSSSCG00000017014	PANK3	ssc:100512746	1	0		1	ENSSSCG00000017014
ssc03050	Proteasome	3/628	41/5126	0.89402616821226	0.999904640347203	ENSSSCG00000005038/ENSSSCG00000005072/ENSSSCG00000031781	PSMC6/PSMA3/PSMB10	ssc:100154148/ssc:100154408/ssc:733626	3	0		3	ENSSSCG00000005038/ENSSSCG00000005072/ENSSSCG00000031781
ssc05418	Fluid shear stress and atherosclerosis	10/628	113/5126	0.900901334635027	0.999904640347203	ENSSSCG00000002383/ENSSSCG00000015874/ENSSSCG00000030957/ENSSSCG00000010360/ENSSSCG00000003909/ENSSSCG00000030413/ENSSSCG00000031493/ENSSSCG00000005453/ENSSSCG00000007115/ENSSSCG00000005701	FOS/ACVR1/NFKB1/BMPR1A/-/PIK3CA/CYBA/-/THBD/ASS1	ssc:100144486/ssc:100152307/ssc:751869/ssc:100169652/ssc:100511937/ssc:100621789/ssc:397507/ssc:397581/ssc:100157642/ssc:414411	10	5	ENSSSCG00000002383/ENSSSCG00000015874/ENSSSCG00000030957/ENSSSCG00000003909/ENSSSCG00000007115	5	ENSSSCG00000010360/ENSSSCG00000030413/ENSSSCG00000031493/ENSSSCG00000005453/ENSSSCG00000005701
ssc04270	Vascular smooth muscle contraction	7/628	84/5126	0.904193628982448	0.999904640347203	ENSSSCG00000008540/ENSSSCG00000021893/ENSSSCG00000007056/ENSSSCG00000012298/ENSSSCG00000011867/ENSSSCG00000006461/ENSSSCG00000010054	PPP1CB/ROCK1/PLCB1/CACNA1F/MYLK/ARHGEF11/ADORA2A	ssc:397378/ssc:397447/ssc:100152679/ssc:100514745/ssc:396848/ssc:100157291/ssc:503661	7	2	ENSSSCG00000011867/ENSSSCG00000006461	5	ENSSSCG00000008540/ENSSSCG00000021893/ENSSSCG00000007056/ENSSSCG00000012298/ENSSSCG00000010054
ssc04072	Phospholipase D signaling pathway	10/628	114/5126	0.906553160601919	0.999904640347203	ENSSSCG00000035355/ENSSSCG00000026969/ENSSSCG00000003909/ENSSSCG00000039548/ENSSSCG00000007056/ENSSSCG00000030413/ENSSSCG00000008953/ENSSSCG00000022126/ENSSSCG00000007163/ENSSSCG00000036063	F2R/KRAS/-/PTGFR/PLCB1/PIK3CA/CXCL8/EGFR/AVP/LPAR6	ssc:100521609/ssc:100518251/ssc:100511937/ssc:397126/ssc:100152679/ssc:100621789/ssc:396880/ssc:397070/ssc:396995/ssc:100738399	10	3	ENSSSCG00000035355/ENSSSCG00000003909/ENSSSCG00000022126	7	ENSSSCG00000026969/ENSSSCG00000039548/ENSSSCG00000007056/ENSSSCG00000030413/ENSSSCG00000008953/ENSSSCG00000007163/ENSSSCG00000036063
ssc04664	Fc epsilon RI signaling pathway	4/628	54/5126	0.911660167544161	0.999904640347203	ENSSSCG00000026969/ENSSSCG00000003909/ENSSSCG00000037719/ENSSSCG00000030413	KRAS/-/PDPK1/PIK3CA	ssc:100518251/ssc:100511937/ssc:100192445/ssc:100621789	4	2	ENSSSCG00000003909/ENSSSCG00000037719	2	ENSSSCG00000026969/ENSSSCG00000030413
ssc00590	Arachidonic acid metabolism	3/628	43/5126	0.911709981095142	0.999904640347203	ENSSSCG00000021973/ENSSSCG00000026914/ENSSSCG00000026554	GPX8/PLA2G16/FAM213B	ssc:100519691/ssc:100512584/ssc:100134955	3	0		3	ENSSSCG00000021973/ENSSSCG00000026914/ENSSSCG00000026554
ssc01230	Biosynthesis of amino acids	5/628	65/5126	0.914107954504045	0.999904640347203	ENSSSCG00000022300/ENSSSCG00000010143/ENSSSCG00000007738/ENSSSCG00000023325/ENSSSCG00000005701	MAT2A/MTR/-/-/ASS1	ssc:100312974/ssc:397300/ssc:100517757/ssc:396930/ssc:414411	5	2	ENSSSCG00000022300/ENSSSCG00000010143	3	ENSSSCG00000007738/ENSSSCG00000023325/ENSSSCG00000005701
ssc04145	Phagosome	9/628	106/5126	0.916258120858736	0.999904640347203	ENSSSCG00000037653/ENSSSCG00000011848/ENSSSCG00000003749/ENSSSCG00000031493/ENSSSCG00000016577/ENSSSCG00000004190/ENSSSCG00000006138/ENSSSCG00000006648/ENSSSCG00000037597	RAB5A/TFRC/PIK3C3/CYBA/ATP6V1F/STX7/ATP6V0D2/CTSS/RAB5B	ssc:100144499/ssc:397062/ssc:503700/ssc:397507/ssc:100518811/ssc:100153196/ssc:100521494/ssc:100153090/ssc:100625381	9	2	ENSSSCG00000006648/ENSSSCG00000037597	7	ENSSSCG00000037653/ENSSSCG00000011848/ENSSSCG00000003749/ENSSSCG00000031493/ENSSSCG00000016577/ENSSSCG00000004190/ENSSSCG00000006138
ssc05143	African trypanosomiasis	1/628	19/5126	0.91691011363691	0.999904640347203	ENSSSCG00000007056	PLCB1	ssc:100152679	1	0		1	ENSSSCG00000007056
ssc05144	Malaria	2/628	32/5126	0.917190600623011	0.999904640347203	ENSSSCG00000024351/ENSSSCG00000008953	MET/CXCL8	ssc:654328/ssc:396880	2	0		2	ENSSSCG00000024351/ENSSSCG00000008953
ssc04512	ECM-receptor interaction	4/628	55/5126	0.918757043849778	0.999904640347203	ENSSSCG00000015375/ENSSSCG00000017022/ENSSSCG00000015507/ENSSSCG00000015555	ITGB8/HMMR/TNN/LAMC1	ssc:100037284/ssc:100515063/ssc:102163961/ssc:100514785	4	2	ENSSSCG00000015507/ENSSSCG00000015555	2	ENSSSCG00000015375/ENSSSCG00000017022
ssc04912	GnRH signaling pathway	5/628	66/5126	0.920524507394666	0.999904640347203	ENSSSCG00000026969/ENSSSCG00000007056/ENSSSCG00000004037/ENSSSCG00000012298/ENSSSCG00000022126	KRAS/PLCB1/MAP3K4/CACNA1F/EGFR	ssc:100518251/ssc:100152679/ssc:100154202/ssc:100514745/ssc:397070	5	2	ENSSSCG00000004037/ENSSSCG00000022126	3	ENSSSCG00000026969/ENSSSCG00000007056/ENSSSCG00000012298
ssc04911	Insulin secretion	4/628	56/5126	0.92533968379035	0.999904640347203	ENSSSCG00000007056/ENSSSCG00000012298/ENSSSCG00000015084/ENSSSCG00000016520	PLCB1/CACNA1F/FXYD2/CREB3L2	ssc:100152679/ssc:100514745/ssc:541593/ssc:100520468	4	1	ENSSSCG00000016520	3	ENSSSCG00000007056/ENSSSCG00000012298/ENSSSCG00000015084
ssc00280	Valine, leucine and isoleucine degradation	3/628	45/5126	0.926672952264613	0.999904640347203	ENSSSCG00000015443/ENSSSCG00000003776/ENSSSCG00000016049	DLD/ACADM/HIBCH	ssc:397129/ssc:397104/ssc:100514687	3	0		3	ENSSSCG00000015443/ENSSSCG00000003776/ENSSSCG00000016049
ssc01212	Fatty acid metabolism	3/628	45/5126	0.926672952264613	0.999904640347203	ENSSSCG00000003776/ENSSSCG00000017694/ENSSSCG00000012583	ACADM/ACACA/ACSL4	ssc:397104/ssc:397324/ssc:448980	3	1	ENSSSCG00000017694	2	ENSSSCG00000003776/ENSSSCG00000012583
ssc04730	Long-term depression	3/628	45/5126	0.926672952264613	0.999904640347203	ENSSSCG00000026969/ENSSSCG00000007056/ENSSSCG00000015407	KRAS/PLCB1/GNAI1	ssc:100518251/ssc:100152679/ssc:100144419	3	0		3	ENSSSCG00000026969/ENSSSCG00000007056/ENSSSCG00000015407
ssc00340	Histidine metabolism	1/628	20/5126	0.92712755022121	0.999904640347203	ENSSSCG00000005271	CARNMT1	ssc:100518712	1	0		1	ENSSSCG00000005271
ssc04950	Maturity onset diabetes of the young	1/628	20/5126	0.92712755022121	0.999904640347203	ENSSSCG00000031356	HES1	ssc:100499567	1	1	ENSSSCG00000031356	0
ssc00071	Fatty acid degradation	2/628	34/5126	0.933072276101965	0.999904640347203	ENSSSCG00000003776/ENSSSCG00000012583	ACADM/ACSL4	ssc:397104/ssc:448980	2	0		2	ENSSSCG00000003776/ENSSSCG00000012583
ssc00620	Pyruvate metabolism	2/628	34/5126	0.933072276101965	0.999904640347203	ENSSSCG00000015443/ENSSSCG00000017694	DLD/ACACA	ssc:397129/ssc:397324	2	1	ENSSSCG00000017694	1	ENSSSCG00000015443
ssc00512	Mucin type O-glycan biosynthesis	1/628	21/5126	0.936090319210846	0.999904640347203	ENSSSCG00000003743	GALNT1	ssc:100738545	1	0		1	ENSSSCG00000003743
ssc05033	Nicotine addiction	1/628	21/5126	0.936090319210846	0.999904640347203	ENSSSCG00000012755	GABRQ	ssc:100153018	1	1	ENSSSCG00000012755	0
ssc00830	Retinol metabolism	2/628	35/5126	0.939888094138984	0.999904640347203	ENSSSCG00000028996/ENSSSCG00000008311	ALDH1A1/CYP26B1	ssc:100517137/ssc:100521659	2	1	ENSSSCG00000008311	1	ENSSSCG00000028996
ssc04961	Endocrine and other factor-regulated calcium reabsorption	2/628	35/5126	0.939888094138984	0.999904640347203	ENSSSCG00000007056/ENSSSCG00000015084	PLCB1/FXYD2	ssc:100152679/ssc:541593	2	0		2	ENSSSCG00000007056/ENSSSCG00000015084
ssc00860	Porphyrin and chlorophyll metabolism	1/628	22/5126	0.943952274066005	0.999904640347203	ENSSSCG00000011700	CP	ssc:406870	1	0		1	ENSSSCG00000011700
ssc04650	Natural killer cell mediated cytotoxicity	5/628	71/5126	0.946650026671973	0.999904640347203	ENSSSCG00000034012/ENSSSCG00000026969/ENSSSCG00000003909/ENSSSCG00000030413/ENSSSCG00000007477	CASP3/KRAS/-/PIK3CA/NFATC2	ssc:397244/ssc:100518251/ssc:100511937/ssc:100621789/ssc:100134969	5	2	ENSSSCG00000003909/ENSSSCG00000007477	3	ENSSSCG00000034012/ENSSSCG00000026969/ENSSSCG00000030413
ssc04750	Inflammatory mediator regulation of TRP channels	5/628	71/5126	0.946650026671973	0.999904640347203	ENSSSCG00000008540/ENSSSCG00000003909/ENSSSCG00000021206/ENSSSCG00000007056/ENSSSCG00000030413	PPP1CB/-/IL1RAP/PLCB1/PIK3CA	ssc:397378/ssc:100511937/ssc:100628318/ssc:100152679/ssc:100621789	5	1	ENSSSCG00000003909	4	ENSSSCG00000008540/ENSSSCG00000021206/ENSSSCG00000007056/ENSSSCG00000030413
ssc01523	Antifolate resistance	1/628	23/5126	0.950848428432492	0.999904640347203	ENSSSCG00000030957	NFKB1	ssc:751869	1	1	ENSSSCG00000030957	0
ssc05321	Inflammatory bowel disease (IBD)	2/628	37/5126	0.95159257810215	0.999904640347203	ENSSSCG00000030957/ENSSSCG00000038073	NFKB1/NOD2	ssc:751869/ssc:100125838	2	2	ENSSSCG00000030957/ENSSSCG00000038073	0
ssc05340	Primary immunodeficiency	1/628	24/5126	0.956897259893279	0.999904640347203	ENSSSCG00000033684	CD79A	ssc:100190992	1	0		1	ENSSSCG00000033684
ssc04146	Peroxisome	5/628	74/5126	0.958321982760818	0.999904640347203	ENSSSCG00000023983/ENSSSCG00000012583/ENSSSCG00000021170/ENSSSCG00000014187/ENSSSCG00000007426	AGPS/ACSL4/FAR1/NUDT12/ACOT8	ssc:100627169/ssc:448980/ssc:100625473/ssc:100512459/ssc:100157173	5	0		5	ENSSSCG00000023983/ENSSSCG00000012583/ENSSSCG00000021170/ENSSSCG00000014187/ENSSSCG00000007426
ssc00350	Tyrosine metabolism	1/628	25/5126	0.962202732411315	0.999904640347203	ENSSSCG00000017384	AOC2	ssc:100520513	1	0		1	ENSSSCG00000017384
ssc00600	Sphingolipid metabolism	2/628	40/5126	0.965158055339043	0.999904640347203	ENSSSCG00000021638/ENSSSCG00000022780	NEU3/UGCG	ssc:100739223/ssc:100152737	2	1	ENSSSCG00000021638	1	ENSSSCG00000022780
ssc04612	Antigen processing and presentation	2/628	40/5126	0.965158055339043	0.999904640347203	ENSSSCG00000000844/ENSSSCG00000006648	NFYB/CTSS	ssc:100157587/ssc:100153090	2	1	ENSSSCG00000006648	1	ENSSSCG00000000844
ssc04974	Protein digestion and absorption	3/628	54/5126	0.969252738139503	0.999904640347203	ENSSSCG00000015084/ENSSSCG00000003459/ENSSSCG00000004484	FXYD2/CELA2A/COL12A1	ssc:541593/ssc:397197/ssc:100156689	3	1	ENSSSCG00000004484	2	ENSSSCG00000015084/ENSSSCG00000003459
ssc00510	N-Glycan biosynthesis	2/628	42/5126	0.972084532487574	0.999904640347203	ENSSSCG00000003815/ENSSSCG00000032321	ALG6/MGAT4C	ssc:100521457/ssc:414851	2	0		2	ENSSSCG00000003815/ENSSSCG00000032321
ssc00020	Citrate cycle (TCA cycle)	1/628	28/5126	0.974516724077916	0.999904640347203	ENSSSCG00000015443	DLD	ssc:397129	1	0		1	ENSSSCG00000015443
ssc03410	Base excision repair	1/628	28/5126	0.974516724077916	0.999904640347203	ENSSSCG00000005008	POLE2	ssc:100521651	1	0		1	ENSSSCG00000005008
ssc00330	Arginine and proline metabolism	2/628	45/5126	0.980045631675254	0.999904640347203	ENSSSCG00000004392/ENSSSCG00000012173	-/SAT1	ssc:100155925/ssc:397645	2	0		2	ENSSSCG00000004392/ENSSSCG00000012173
ssc04080	Neuroactive ligand-receptor interaction	9/628	129/5126	0.982704797704135	0.999904640347203	ENSSSCG00000035355/ENSSSCG00000036008/ENSSSCG00000039548/ENSSSCG00000000033/ENSSSCG00000008122/ENSSSCG00000033221/ENSSSCG00000010054/ENSSSCG00000012755/ENSSSCG00000036063	F2R/TACR1/PTGFR/TSPO/ADRA2B/UTS2R/ADORA2A/GABRQ/LPAR6	ssc:100521609/ssc:110259991/ssc:397126/ssc:396592/ssc:641353/ssc:106507947/ssc:503661/ssc:100153018/ssc:100738399	9	5	ENSSSCG00000035355/ENSSSCG00000036008/ENSSSCG00000008122/ENSSSCG00000033221/ENSSSCG00000012755	4	ENSSSCG00000039548/ENSSSCG00000000033/ENSSSCG00000010054/ENSSSCG00000036063
ssc04742	Taste transduction	1/628	31/5126	0.982823193835209	0.999904640347203	ENSSSCG00000023924	PDE1A	ssc:100152819	1	0		1	ENSSSCG00000023924
ssc04640	Hematopoietic cell lineage	3/628	60/5126	0.983208034463316	0.999904640347203	ENSSSCG00000011848/ENSSSCG00000037449/ENSSSCG00000040725	TFRC/CSF1/IL11	ssc:397062/ssc:100513084/ssc:110261056	3	0		3	ENSSSCG00000011848/ENSSSCG00000037449/ENSSSCG00000040725
ssc00980	Metabolism of xenobiotics by cytochrome P450	1/628	32/5126	0.984940374261409	0.999904640347203	ENSSSCG00000002994	CYP2F1	ssc:100523190	1	1	ENSSSCG00000002994	0
ssc00564	Glycerophospholipid metabolism	4/628	75/5126	0.986691292326281	0.999904640347203	ENSSSCG00000039397/ENSSSCG00000001078/ENSSSCG00000011845/ENSSSCG00000026914	ETNK1/MBOAT1/PCYT1A/PLA2G16	ssc:110260724/ssc:100152017/ssc:100512194/ssc:100512584	4	2	ENSSSCG00000001078/ENSSSCG00000011845	2	ENSSSCG00000039397/ENSSSCG00000026914
ssc04666	Fc gamma R-mediated phagocytosis	4/628	75/5126	0.986691292326281	0.999904640347203	ENSSSCG00000003909/ENSSSCG00000030413/ENSSSCG00000016794/ENSSSCG00000028759	-/PIK3CA/MYO10/ASAP1	ssc:100511937/ssc:100621789/ssc:396902/ssc:106509950	4	3	ENSSSCG00000003909/ENSSSCG00000016794/ENSSSCG00000028759	1	ENSSSCG00000030413
ssc02010	ABC transporters	1/628	34/5126	0.988424980160176	0.999904640347203	ENSSSCG00000017255	ABCA5	ssc:100520049	1	0		1	ENSSSCG00000017255
ssc04976	Bile secretion	2/628	55/5126	0.993637046792499	0.999904640347203	ENSSSCG00000015084/ENSSSCG00000000584	FXYD2/SLCO1A2	ssc:541593/ssc:397534	2	0		2	ENSSSCG00000015084/ENSSSCG00000000584
ssc00970	Aminoacyl-tRNA biosynthesis	1/628	39/5126	0.994007878140225	0.999904640347203	ENSSSCG00000034494	MARS2	ssc:110257078	1	1	ENSSSCG00000034494	0
ssc05204	Chemical carcinogenesis	1/628	40/5126	0.994747617186409	0.999904640347203	ENSSSCG00000006646	ARNT	ssc:396653	1	1	ENSSSCG00000006646	0
ssc05416	Viral myocarditis	1/628	42/5126	0.995964737823018	0.999904640347203	ENSSSCG00000034012	CASP3	ssc:397244	1	0		1	ENSSSCG00000034012
ssc04740	Olfactory transduction	1/628	48/5126	0.998171357232149	0.999904640347203	ENSSSCG00000023924	PDE1A	ssc:100152819	1	0		1	ENSSSCG00000023924
ssc00561	Glycerolipid metabolism	1/628	49/5126	0.998397506830064	0.999904640347203	ENSSSCG00000001078	MBOAT1	ssc:100152017	1	1	ENSSSCG00000001078	0
ssc00010	Glycolysis / Gluconeogenesis	1/628	51/5126	0.998769463232383	0.999904640347203	ENSSSCG00000015443	DLD	ssc:397129	1	0		1	ENSSSCG00000015443
ssc04142	Lysosome	3/628	102/5126	0.999830342191268	0.999904640347203	ENSSSCG00000002740/ENSSSCG00000006138/ENSSSCG00000006648	AP1G1/ATP6V0D2/CTSS	ssc:100514713/ssc:100521494/ssc:100153090	3	2	ENSSSCG00000002740/ENSSSCG00000006648	1	ENSSSCG00000006138
ssc01200	Carbon metabolism	3/628	107/5126	0.999904640347203	0.999904640347203	ENSSSCG00000015443/ENSSSCG00000003776/ENSSSCG00000016049	DLD/ACADM/HIBCH	ssc:397129/ssc:397104/ssc:100514687	3	0		3	ENSSSCG00000015443/ENSSSCG00000003776/ENSSSCG00000016049
